# Supplementary material for: Viral-eukaryotic gene exchange drives infection mode and cellular evolution
Source: Research Square preprint supplement (doi:10.21203/rs.3.rs-380297/v1), 2021-04-29
Supplement: Supplementary file 1 [file 40ec913f34291ad59631d2ec.xlsx]

## Sheet: Sheet1
Supplementary Table 5. Summary of viral-derived glycosyltransferases.
HGT characteristics						Topology notes and statistics				PANTHER annotations			EggNOG annotations
COG	Direction	Recipient_taxaID	Recipient_name	Donor_taxaID	Donor_name	Notes	Recipient_branch_length	Sister_support	Cousin_support	TopAnnotation	%withTopAnnotation	TotalAnnotatedSequences	TopAnnotation	%withTopAnnotation	TotalAnnotatedSequences	TotalSequences	DeepLoc_predicted_localization
COG001908	VtoE	2925	Alexandrium catenella	2732007	Nucleocytoviricota	origin = virus	0.62573	88.7	88.6	MANNOSYL PHOSPHORYLINOSITOL CERAMIDE SYNTHASE	0.3889	18	O-methyltransferase	0.531915	94	174	Cytoplasm
COG001908	VtoE	1775427	Amoebophrya sp. AT5.2	2732007	Nucleocytoviricota	origin = virus	0.950373	89.8	86.3	MANNOSYL PHOSPHORYLINOSITOL CERAMIDE SYNTHASE	0.3889	18	O-methyltransferase	0.531915	94	174	Plastid
COG004568	VtoE	44056	Aureococcus anophagefferens	10501	Phycodnaviridae	origin = virus	1.94216	98.9	root	GLYCOSYLTRANSFERASE-LIKE KOBITO 1	0.8889	9	spermidine synthase activity	0.925926	27	33	Cytoplasm
COG003192	VtoE	227086	Bigelowiella natans	2732523	Megaviricetes	origin = virus	1.33617	94.7	root	PTHR40743	1	34	Exostosin family	0.925926	54	82	Nucleus
COG002311	VtoE	2511126	Chlorella clade	2732523	Megaviricetes	origin = virus, cousin unclear	0.711821	94.9	92.6	PROCOLLAGEN-LYSINE,2-OXOGLUTARATE 5-DIOXYGENASE/GLYCOSYLTRANSFERASE 25 FAMILY MEMBER	1	48	Glycosyltransferase family 25 (LPS biosynthesis protein)	0.259259	135	149	Unknown
COG001274	VtoE	1460289	Chrysochromulina tobinii	2732007	Nucleocytoviricota	origin = unkn	0.946237	92.2	95.3	RIBITOL-5-PHOSPHATE XYLOSYLTRANSFERASE 1	0.8384	99	Haloacid dehalogenase-like hydrolase	0.357143	14	258	Unknown
COG002014	VtoE	1460289	Chrysochromulina tobinii	2732007	Nucleocytoviricota	origin = unkn	1.51802	87.8	89.2	MANNOSYL PHOSPHORYLINOSITOL CERAMIDE SYNTHASE	0.9744	39	Capsular polysaccharide synthesis protein	0.987261	157	164	Cytoplasm
COG002429	VtoE	1460289	Chrysochromulina tobinii	181086	Prymnesiovirus	origin = prokaryotic	0.386536	94.5	99.4	PTHR35609	1	65	response to abiotic stimulus	0.5	2	140	Cytoplasm
COG004676	VtoE	1460289	Chrysochromulina tobinii	10501	Phycodnaviridae	origin = virus	1.52173	90	root	GLYCOGENIN SUBFAMILY MEMBER	1	10	transferase activity, transferring glycosyl groups	0.9	10	31	Nucleus
COG001308	VtoE	574566	Coccomyxa subellipsoidea C-169	2732007	Nucleocytoviricota	origin = unkn	0.543021	94.9	100	BETA-1,4-MANNOSYL-GLYCOPROTEIN BETA-1,4-N-ACETYLGLUCOSAMINYL-TRANSFERASE	1	147	Glycosyltransferase family 17	0.814655	232	252	Unknown
COG000770	VtoE	33083	Dictyostelia	181083	Chlorovirus	origin = eukaryotic, cousin unclear	0.723265	93	95	GLCNAC TRANSFERASE-RELATED	1	318	Glycosyltransferase (GlcNAc)	0.845758	389	396	Nucleus
COG000401	VtoE	2864	Dinophyceae	2732007	Nucleocytoviricota	origin = eukaryotic, cousin unclear	0.761853	99.4	97.6	BETA-1,4-GALACTOSYLTRANSFERASE	0.9967	610	N-terminal region of glycosyl transferase group 7	0.248387	620	630	Plastid
COG000404	VtoE	2864	Dinophyceae	10501	Phycodnaviridae	origin = virus	1.11439	84.1	83	L-FUCOSYLTRANSFERASE	0.625	8	Glycosyltransferase family 25 (LPS biosynthesis protein)	0.850168	594	627	Extracellular
COG002534	VtoE	2864	Dinophyceae	455363	unclassified Phycodnaviridae	origin = virus	0.286843	90.9	90.7	BETA1,3-GALACTOSYLTRANSFERASE	0.5	2	Glycosyl transferase, family 2	0.84	25	131	Cytoplasm
COG003312	VtoE	2864	Dinophyceae	2732007	Nucleocytoviricota	origin = unkn	1.07211	91	80.1	ALPHA- 1,3 -FUCOSYLTRANSFERASE	0.7778	9	Glycosyltransferase family 10 (fucosyltransferase) C-term	0.818182	11	75	Cytoplasm
COG003246	VtoE	2877	Ectocarpales	1586712	Yellowstone lake mimivirus	origin = prokaryotic, cousin unclear	0.181178	99.6	98.5	CELLULOSE SYNTHASE CATALYTIC SUBUNIT A [UDP-FORMING]	1	52	Belongs to the glycosyl hydrolase 12 (cellulase H) family	0.544304	79	79	Cell_membrane
COG003419	VtoE	2903	Emiliania huxleyi	2732523	Megaviricetes	origin = virus	1.59973	97.6	root	MANNOSYL PHOSPHORYLINOSITOL CERAMIDE SYNTHASE	0.9844	64	Glycosyltransferase sugar-binding region containing DXD motif	0.446154	65	69	Unknown
COG003902	VtoE	2903	Emiliania huxleyi	2732007	Nucleocytoviricota	origin = virus	1.80524	100	root	MANNOSYL PHOSPHORYLINOSITOL CERAMIDE SYNTHASE	0.7949	39	Glycosyltransferase sugar-binding region containing DXD motif	0.731707	41	50	Mitochondrion
COG004137	VtoE	2903	Emiliania huxleyi	2732007	Nucleocytoviricota	origin = virus	1.90944	96.8	94.6	ALPHA-1,6-MANNOSYLTRANSFERASE MNN11-RELATED	0.9583	24	galactosyl transferase GMA12/MNN10 family	0.4	10	43	Unknown
COG000378	VtoE	2759	Eukaryota	10239	Viruses	origin = prokaryotic	0.6099	96.6	92.4	NICOTINAMIDE PHOSPHORIBOSYLTRANSFERASE	1	487	nicotinate-nucleotide diphosphorylase (carboxylating) activity	0.483721	645	651	Cytoplasm
COG000617	VtoE	2759	Eukaryota	2732523	Megaviricetes	origin = prokaryotic	0.466476	84	82.7	MANNOSYL PHOSPHORYLINOSITOL CERAMIDE SYNTHASE	0.8295	387	Glycosyltransferase sugar-binding region containing DXD motif	0.876126	444	477	Golgi_apparatus
COG000770	VtoE	2759	Eukaryota	455363	unclassified Phycodnaviridae	origin = eukaryotic	0.347001	94.3	94.1	GLCNAC TRANSFERASE-RELATED	1	318	Glycosyltransferase (GlcNAc)	0.845758	389	396	Extracellular
COG001340	VtoE	2759	Eukaryota	10239	Viruses	origin = virus	0.243654	80.3	95.3	BETA-1,3-GALACTOSYLTRANSFERASE 6	0.3333	3	negative regulation of septation initiation signaling	0.589109	202	246	Golgi_apparatus
COG002219	VtoE	2759	Eukaryota	2732007	Nucleocytoviricota	origin = prokaryotic	0.203494	84.6	92.1	KDEL LYS-ASP-GLU-LEU CONTAINING - RELATED	0.9091	22	Glycosyl transferase family 90	0.635762	151	153	Nucleus
COG002535	VtoE	2759	Eukaryota	455363	unclassified Phycodnaviridae	origin = virus	0.24629	89	99.9	BETA-1,4-MANNOSYL-GLYCOPROTEIN BETA-1,4-N-ACETYLGLUCOSAMINYL-TRANSFERASE	0.5385	13	transferase activity, transferring glycosyl groups	0.967213	122	131	Cytoplasm
COG003142	VtoE	2759	Eukaryota	2732007	Nucleocytoviricota	origin = virus	0.223365	100	root	PROTEIN STAR	0.6667	3	transferase activity	0.25	8	85	Golgi_apparatus
COG001274	VtoE	635003	Fragilariopsis cylindrus CCMP1102	10487	Iridovirus	origin = unkn, cousin unclear	1.67518	95.4	82.5	RIBITOL-5-PHOSPHATE XYLOSYLTRANSFERASE 1	0.8384	99	Haloacid dehalogenase-like hydrolase	0.357143	14	258	Nucleus
COG001340	VtoE	635003	Fragilariopsis cylindrus CCMP1102	10239	Viruses	origin = unkn, cousin unclear	1.77373	85.9	root	BETA-1,3-GALACTOSYLTRANSFERASE 6	0.3333	3	negative regulation of septation initiation signaling	0.589109	202	246	Golgi_apparatus
COG001438	VtoE	130081	Galdieria sulphuraria	2732555	Pimascovirales	origin = eukaryotic, cousin unclear	2.09487	95.1	85.1	MANNOSYL PHOSPHORYLINOSITOL CERAMIDE SYNTHASE	1	181	Glycosyltransferase sugar-binding region containing DXD motif	0.502242	223	229	Golgi_apparatus
COG000231	VtoE	905079	Guillardia theta CCMP2712	2732523	Megaviricetes	origin = unkn, cousin unclear	1.3266	80.4	83.2	GALACTOSIDE 2-L-FUCOSYLTRANSFERASE	0.9983	577	N-acetyllactosaminide 3-alpha-galactosyltransferase activity	0.931767	894	921	Extracellular
COG001308	VtoE	905079	Guillardia theta CCMP2712	12429	unclassified viruses	origin = unkn	1.14933	97.4	88	BETA-1,4-MANNOSYL-GLYCOPROTEIN BETA-1,4-N-ACETYLGLUCOSAMINYL-TRANSFERASE	1	147	Glycosyltransferase family 17	0.814655	232	252	Cytoplasm
COG001340	VtoE	905079	Guillardia theta CCMP2712	10239	Viruses	origin = virus	1.62351	80.3	95.3	BETA-1,3-GALACTOSYLTRANSFERASE 6	0.3333	3	negative regulation of septation initiation signaling	0.589109	202	246	Extracellular
COG003057	VtoE	905079	Guillardia theta CCMP2712	2732007	Nucleocytoviricota	origin = unkn	1.11647	80.2	84.5	UNCHARACTERIZED	0.5	4	Expressed protein	0.844156	77	89	Cytoplasm
COG000770	VtoE	42384	Hyphochytrium catenoides	2732007	Nucleocytoviricota	origin = eukaryotic, cousin unclear	0.678618	97.8	95	GLCNAC TRANSFERASE-RELATED	1	318	Glycosyltransferase (GlcNAc)	0.845758	389	396	Unknown
COG000231	VtoE	5653	Kinetoplastea	10239	Viruses	origin = virus, cousin unclear	1.15024	83.7	83.2	GALACTOSIDE 2-L-FUCOSYLTRANSFERASE	0.9983	577	N-acetyllactosaminide 3-alpha-galactosyltransferase activity	0.931767	894	921	Mitochondrion
COG002758	VtoE	5653	Kinetoplastea	2732007	Nucleocytoviricota	origin = virus	0.381739	root	root	INITIATION-SPECIFIC ALPHA-1,6-MANNOSYLTRANSFERASE	0.5	2	Glycosyltransferase sugar-binding region containing DXD motif	0.5	2	110	Mitochondrion
COG001340	VtoE	564608	Micromonas pusilla CCMP1545	10239	Viruses	origin = unkn	2.05722	90.2	84.3	BETA-1,3-GALACTOSYLTRANSFERASE 6	0.3333	3	negative regulation of septation initiation signaling	0.589109	202	246	Golgi_apparatus
COG003142	VtoE	564608	Micromonas pusilla CCMP1545	2732007	Nucleocytoviricota	origin = virus	0.978591	94.4	100	PROTEIN STAR	0.6667	3	transferase activity	0.25	8	85	Golgi_apparatus
COG001438	VtoE	5762	Naegleria gruberi	549779	Mimiviridae	origin = eukaryotic	1.32187	93.3	85.1	MANNOSYL PHOSPHORYLINOSITOL CERAMIDE SYNTHASE	1	181	Glycosyltransferase sugar-binding region containing DXD motif	0.502242	223	229	Unknown
COG002895	VtoE	45351	Nematostella vectensis	10239	Viruses	origin = unkn	0.653808	88.2	86.9	GLYCOGENIN SUBFAMILY MEMBER	1	98	transferase activity, transferring glycosyl groups	0.836735	98	100	Unknown
COG002012	VtoE	33154	Opisthokonta	2732007	Nucleocytoviricota	origin = prokaryotic	0.134379	84	93	HYALURONAN SYNTHASE	1	117	extracellular polysaccharide metabolic process	0.164634	164	164	Endoplasmic_reticulum
COG003057	VtoE	1137138	Pleurotus ostreatus PC15	2732007	Nucleocytoviricota	origin = unkn, cousin unclear	0.510078	92.5	87.5	UNCHARACTERIZED	0.5	4	Expressed protein	0.844156	77	89	Golgi_apparatus
COG001293	VtoE	89957	Polarella glacialis	10239	Viruses	origin = unkn	1.33009	89.9	81.2	RIBITOL-5-PHOSPHATE XYLOSYLTRANSFERASE 1	0.5714	7	alpha-(1->3)-fucosyltransferase activity	0.882353	51	254	Cytoplasm
COG001340	VtoE	133427	Protoceratium reticulatum	2732523	Megaviricetes	origin = unkn	1.83168	85.9	86	BETA-1,3-GALACTOSYLTRANSFERASE 6	0.3333	3	negative regulation of septation initiation signaling	0.589109	202	246	Unknown
COG001340	VtoE	2608131	Prymnesiophyceae	455363	unclassified Phycodnaviridae	origin = unkn, cousin unclear	0.733258	83.1	84.3	BETA-1,3-GALACTOSYLTRANSFERASE 6	0.3333	3	negative regulation of septation initiation signaling	0.589109	202	246	Cytoplasm
COG004568	VtoE	2608131	Prymnesiophyceae	10501	Phycodnaviridae	origin = virus	0.443887	98.9	root	GLYCOSYLTRANSFERASE-LIKE KOBITO 1	0.8889	9	spermidine synthase activity	0.925926	27	33	Nucleus
COG003057	VtoE	947166	Ramazzottius varieornatus	2732007	Nucleocytoviricota	origin = unkn, cousin unclear	0.202732	95.2	80.8	UNCHARACTERIZED	0.5	4	Expressed protein	0.844156	77	89	Golgi_apparatus
COG002014	VtoE	988480	Rozella allomycis CSF55	455363	unclassified Phycodnaviridae	origin = unkn, cousin unclear	1.34847	91.2	root	MANNOSYL PHOSPHORYLINOSITOL CERAMIDE SYNTHASE	0.9744	39	Capsular polysaccharide synthesis protein	0.987261	157	164	Unknown
COG003419	VtoE	946362	Salpingoeca rosetta	2732523	Megaviricetes	origin = eukaryotic	1.69331	97.6	root	MANNOSYL PHOSPHORYLINOSITOL CERAMIDE SYNTHASE	0.9844	64	Glycosyltransferase sugar-binding region containing DXD motif	0.446154	65	69	Golgi_apparatus
COG002311	VtoE	2698737	Sar	2732007	Nucleocytoviricota	origin = virus	0.244214	93.4	root	PROCOLLAGEN-LYSINE,2-OXOGLUTARATE 5-DIOXYGENASE/GLYCOSYLTRANSFERASE 25 FAMILY MEMBER	1	48	Glycosyltransferase family 25 (LPS biosynthesis protein)	0.259259	135	149	Nucleus
COG001340	VtoE	667725	Sphaeroforma arctica JP610	2732007	Nucleocytoviricota	origin = eukaryotic	0.439031	90.8	96.9	BETA-1,3-GALACTOSYLTRANSFERASE 6	0.3333	3	negative regulation of septation initiation signaling	0.589109	202	246	Endoplasmic_reticulum
COG001851	VtoE	33634	Stramenopiles	2732007	Nucleocytoviricota	origin = virus	0.25304	87.3	87.2	KDEL LYS-ASP-GLU-LEU CONTAINING - RELATED	0.9568	162	Glycosyl transferase family 90	0.793103	174	178	Nucleus
COG002014	VtoE	47790	Tetrabaena socialis	2732007	Nucleocytoviricota	origin = unkn	0.579606	82.9	84.6	MANNOSYL PHOSPHORYLINOSITOL CERAMIDE SYNTHASE	0.9744	39	Capsular polysaccharide synthesis protein	0.987261	157	164	Endoplasmic_reticulum
COG002014	VtoE	47790	Tetrabaena socialis	2732007	Nucleocytoviricota	origin = unkn	0.568746	91.9	91.7	MANNOSYL PHOSPHORYLINOSITOL CERAMIDE SYNTHASE	0.9744	39	Capsular polysaccharide synthesis protein	0.987261	157	164	Cytoplasm
COG002014	VtoE	47790	Tetrabaena socialis	455363	unclassified Phycodnaviridae	origin = unkn	1.08841	99.3	88.6	MANNOSYL PHOSPHORYLINOSITOL CERAMIDE SYNTHASE	0.9744	39	Capsular polysaccharide synthesis protein	0.987261	157	164	Endoplasmic_reticulum
COG002311	VtoE	47790	Tetrabaena socialis	2732007	Nucleocytoviricota	origin = virus	1.00317	97.2	92.6	PROCOLLAGEN-LYSINE,2-OXOGLUTARATE 5-DIOXYGENASE/GLYCOSYLTRANSFERASE 25 FAMILY MEMBER	1	48	Glycosyltransferase family 25 (LPS biosynthesis protein)	0.259259	135	149	Unknown
COG004568	VtoE	47790	Tetrabaena socialis	2732007	Nucleocytoviricota	origin = unkn	1.01486	88.8	98.9	GLYCOSYLTRANSFERASE-LIKE KOBITO 1	0.8889	9	spermidine synthase activity	0.925926	27	33	Unknown
COG002958	VtoE	159749	Thalassiosira oceanica	10239	Viruses	origin = virus	1.54178	99.1	100	INOSITOL PHOSPHOCERAMIDE MANNOSYLTRANSFERASE 1	0.6667	3	O-methyltransferase	0.488372	43	96	Mitochondrion
COG001293	VtoE	35128	Thalassiosira pseudonana	455363	unclassified Phycodnaviridae	origin = prokaryotic	0.87885	89.9	83.3	RIBITOL-5-PHOSPHATE XYLOSYLTRANSFERASE 1	0.5714	7	alpha-(1->3)-fucosyltransferase activity	0.882353	51	254	Mitochondrion
