# Supplementary material for: Viral-eukaryotic gene exchange drives infection mode and cellular evolution
Source: Research Square preprint supplement (doi:10.21203/rs.3.rs-380297/v1), 2021-04-29
Supplement: Supplementary file 6 [file 4ce56c1d2cb2ae744b4bb754.xlsx]

## Sheet: contamination_analysis.2020_08_
Supplementary Table 2. Contamination scores for individual eukaryotic proteins involved in HGT.
Sequence (TaxaID.ProteinID)	Sister species score	Contig size score	GC content score	Upstream score	Downstream score	Total score	Contig size	L50	Contig GC	Genome GC	Upstream id	Downstream id
133427	3	1	1	1	1	7	1505	852	0.665116	0.662944	eukaryotic	eukaryotic
10090.A3KFX0	3	1	1	1	1	7	156508117	130694994	0.410915	0.416058	eukaryotic	eukaryotic
10090.D3Z7P3	3	1	1	1	1	7	195471972	130694994	0.403959	0.416058	eukaryotic	eukaryotic
10090.O08582	3	1	1	1	1	7	104043686	130694994	0.405895	0.416058	eukaryotic	eukaryotic
10090.P52432	3	1	1	1	1	7	94987272	130694994	0.412197	0.416058	eukaryotic	eukaryotic
10090.P53798	3	1	1	1	1	7	124902245	130694994	0.400215	0.416058	eukaryotic	eukaryotic
10090.Q571F8	3	1	1	1	1	7	130694994	130694994	0.402534	0.416058	eukaryotic	eukaryotic
10090.Q60710	3	1	1	1	1	7	182113225	130694994	0.412087	0.416058	eukaryotic	eukaryotic
10090.Q68FE2	3	1	1	1	1	7	195471972	130694994	0.403959	0.416058	eukaryotic	eukaryotic
10090.Q6EBV9	3	1	1	1	1	7	151834685	130694994	0.41437	0.416058	eukaryotic	eukaryotic
10090.Q6P6J4	3	1	1	1	1	7	151834685	130694994	0.41437	0.416058	eukaryotic	eukaryotic
10090.Q8BMJ2	3	1	1	1	1	7	90702640	130694994	0.39954	0.416058	eukaryotic	eukaryotic
10090.Q91YE9	3	1	1	1	1	7	120129023	130694994	0.406228	0.416058	eukaryotic	eukaryotic
10090.Q99J62	3	1	1	1	1	7	98207769	130694994	0.396095	0.416058	eukaryotic	eukaryotic
10090.Q9D0L8	3	1	1	1	1	7	90702640	130694994	0.39954	0.416058	eukaryotic	eukaryotic
10090.Q9EQC1	3	1	1	1	1	7	145441460	130694994	0.419922	0.416058	eukaryotic	eukaryotic
10090.Q9Z0G2	3	1	1	1	1	7	171031300	130694994	0.375225	0.416058	eukaryotic	eukaryotic
10116.A0A0G2JX62	3	1	1	1	1	7	184226340	145729303	0.39917	0.37177	eukaryotic	eukaryotic
10116.A0A0G2JX78	3	1	1	1	1	7	147991368	145729303	0.401234	0.37177	eukaryotic	eukaryotic
10116.A0A0G2KAH6	3	1	1	1	1	7	159970022	145729303	0.358095	0.37177	eukaryotic	eukaryotic
10116.B5DF60	3	1	1	1	1	7	88201930	145729303	0.400322	0.37177	eukaryotic	eukaryotic
10116.D2XV59	3	1	1	1	1	7	145729303	145729303	0.403889	0.37177	eukaryotic	eukaryotic
10116.D3Z898	3	1	1	1	1	7	177699993	145729303	0.406209	0.37177	eukaryotic	eukaryotic
10116.D3ZVD3	3	1	1	1	1	7	173707220	145729303	0.404852	0.37177	eukaryotic	eukaryotic
10116.D4A5A6	3	1	1	1	1	7	112626472	145729303	0.438368	0.37177	eukaryotic	eukaryotic
10116.D4ABD5	3	1	1	1	1	7	184226340	145729303	0.39917	0.37177	eukaryotic	eukaryotic
10116.D4ABV1	3	1	1	1	1	7	122095298	145729303	0.400418	0.37177	eukaryotic	eukaryotic
10116.G3V762	3	1	1	1	1	7	145729303	145729303	0.403889	0.37177	eukaryotic	eukaryotic
10116.O35048	3	1	1	1	1	7	282763075	145729303	0.405326	0.37177	eukaryotic	eukaryotic
10116.O88426	3	1	1	1	1	7	133307653	145729303	0.413156	0.37177	eukaryotic	eukaryotic
10116.Q5FWU3	3	1	1	1	1	7	122095298	145729303	0.400418	0.37177	eukaryotic	eukaryotic
10116.Q5RJK9	3	1	1	1	1	7	122095298	145729303	0.400418	0.37177	eukaryotic	eukaryotic
10116.Q6VV72	3	1	1	1	1	7	88201930	145729303	0.400322	0.37177	eukaryotic	eukaryotic
1054147.F4PG52	3	1	1	1	1	7	2485437	2485437	0.343678	0.334786	eukaryotic	eukaryotic
1054147.F4PGW8	3	1	1	1	1	7	2485437	2485437	0.343678	0.334786	eukaryotic	eukaryotic
1054147.F4PHB5	3	1	1	1	1	7	2485437	2485437	0.343678	0.334786	eukaryotic	eukaryotic
1054147.F4PHP1	3	1	1	1	1	7	2485437	2485437	0.343678	0.334786	eukaryotic	eukaryotic
1054147.F4PK46	3	1	1	1	1	7	1770756	2485437	0.343406	0.334786	eukaryotic	eukaryotic
1054147.F4PL06	3	1	1	1	1	7	2750716	2485437	0.341534	0.334786	eukaryotic	eukaryotic
1054147.F4PLY2	3	1	1	1	1	7	2750716	2485437	0.341534	0.334786	eukaryotic	eukaryotic
1054147.F4PM15	3	1	1	1	1	7	2750716	2485437	0.341534	0.334786	eukaryotic	eukaryotic
1054147.F4PMR9	3	1	1	1	1	7	2750716	2485437	0.341534	0.334786	eukaryotic	eukaryotic
1054147.F4PNZ4	3	1	1	1	1	7	1429295	2485437	0.334205	0.334786	eukaryotic	eukaryotic
1054147.F4PQ15	3	1	1	1	1	7	1429295	2485437	0.334205	0.334786	eukaryotic	eukaryotic
1054147.F4PQB6	3	1	1	1	1	7	1429295	2485437	0.334205	0.334786	eukaryotic	eukaryotic
1054147.F4PSX7	3	1	1	1	1	7	4166813	2485437	0.339716	0.334786	eukaryotic	eukaryotic
1054147.F4PTN3	3	1	1	1	1	7	4166813	2485437	0.339716	0.334786	eukaryotic	eukaryotic
1054147.F4PUR4	3	1	1	1	1	7	4166813	2485437	0.339716	0.334786	eukaryotic	eukaryotic
1054147.F4PUX7	3	1	1	1	1	7	4166813	2485437	0.339716	0.334786	eukaryotic	eukaryotic
1054147.F4Q4V8	3	1	1	1	1	7	3468651	2485437	0.339089	0.334786	eukaryotic	eukaryotic
1054147.F4QC73	3	1	1	1	1	7	3408801	2485437	0.340342	0.334786	eukaryotic	eukaryotic
1054147.F4QCU7	3	1	1	1	1	7	3408801	2485437	0.340342	0.334786	eukaryotic	eukaryotic
1054147.F4QDY8	3	1	1	1	1	7	3408801	2485437	0.340342	0.334786	eukaryotic	eukaryotic
1054147.F4QE48	3	1	1	1	1	7	3408801	2485437	0.340342	0.334786	eukaryotic	eukaryotic
1054147.F4QF64	3	1	1	1	1	7	3408801	2485437	0.340342	0.334786	eukaryotic	eukaryotic
109478.S7MIB2	3	1	1	1	1	7	7351771	3225833	0.398841	0.425532	eukaryotic	eukaryotic
109478.S7NJJ2	3	1	1	1	1	7	2022071	3225833	0.466967	0.425532	eukaryotic	eukaryotic
109478.S7NR28	3	1	1	1	1	7	12238382	3225833	0.386953	0.425532	eukaryotic	eukaryotic
109478.S7PE67	3	1	1	1	1	7	5353504	3225833	0.460569	0.425532	eukaryotic	eukaryotic
109478.S7PZ99	3	1	1	1	1	7	1731029	3225833	0.456069	0.425532	eukaryotic	eukaryotic
109478.S7Q4Y9	3	1	1	1	1	7	8413827	3225833	0.40363	0.425532	eukaryotic	eukaryotic
109478.S7Q633	3	1	1	1	1	7	1731029	3225833	0.456069	0.425532	eukaryotic	eukaryotic
110365.A0A023AYY8	3	1	1	1	1	7	100593	199433	0.545545	0.500498	eukaryotic	eukaryotic
110365.A0A023B423	3	1	1	1	1	7	188891	199433	0.525674	0.500498	eukaryotic	eukaryotic
110365.A0A023B933	3	1	1	1	1	7	359231	199433	0.520721	0.500498	eukaryotic	eukaryotic
110365.A0A023BAD6	3	1	1	1	1	7	391707	199433	0.537861	0.500498	eukaryotic	eukaryotic
110365.A0A023BCI2	3	1	1	1	1	7	698521	199433	0.533925	0.500498	eukaryotic	eukaryotic
112090.W4FSI9	3	1	1	1	1	7	427436	657537	0.386334	0.444495	eukaryotic	eukaryotic
112090.W4G195	3	1	1	1	1	7	588937	657537	0.429484	0.444495	eukaryotic	eukaryotic
112090.W4G3T7	3	1	1	1	1	7	638067	657537	0.36205	0.444495	eukaryotic	eukaryotic
112090.W4G4W0	3	1	1	1	1	7	638067	657537	0.36205	0.444495	eukaryotic	eukaryotic
112090.W4G5M1	3	1	1	1	1	7	638067	657537	0.36205	0.444495	eukaryotic	eukaryotic
112090.W4G5M7	3	1	1	1	1	7	638067	657537	0.36205	0.444495	eukaryotic	eukaryotic
112090.W4G7T6	3	1	1	1	1	7	717046	657537	0.377624	0.444495	eukaryotic	eukaryotic
112090.W4GHK4	3	1	1	1	1	7	1313121	657537	0.39834	0.444495	eukaryotic	eukaryotic
112090.W4GL75	3	1	1	1	1	7	1282489	657537	0.415512	0.444495	eukaryotic	eukaryotic
112090.W4GLI5	3	1	1	1	1	7	1183922	657537	0.438303	0.444495	eukaryotic	eukaryotic
112090.W4GTK0	3	1	1	1	1	7	1535167	657537	0.376092	0.444495	eukaryotic	eukaryotic
112090.W4H949	3	1	1	1	1	7	2059304	657537	0.448052	0.444495	eukaryotic	eukaryotic
1137138.A0A067NCG2	3	1	1	1	1	7	2851239	2851239	0.506918	0.502314	eukaryotic	eukaryotic
1137138.A0A067NEA6	3	1	1	1	1	7	2726769	2851239	0.50814	0.502314	eukaryotic	eukaryotic
1137138.A0A067NEW1	3	1	1	1	1	7	2726769	2851239	0.50814	0.502314	eukaryotic	eukaryotic
1137138.A0A067NG73	3	1	1	1	1	7	2726769	2851239	0.50814	0.502314	eukaryotic	eukaryotic
1137138.A0A067NNS4	3	1	1	1	1	7	2650207	2851239	0.503818	0.502314	eukaryotic	eukaryotic
1137138.A0A067NYQ3	3	1	1	1	1	7	4773662	2851239	0.505453	0.502314	eukaryotic	eukaryotic
1137138.A0A067PAN8	3	1	1	1	1	7	4773662	2851239	0.505453	0.502314	eukaryotic	eukaryotic
1137138.A0A067PCA6	3	1	1	1	1	7	4773662	2851239	0.505453	0.502314	eukaryotic	eukaryotic
1195612.AFP65338	3	1	1	1	1	7	243994	232700	0.261203	0.261203	eukaryotic	eukaryotic
1195612.AFP65565	3	1	1	1	1	7	226161	232700	0.261553	0.261203	eukaryotic	eukaryotic
1195612.AFP65662	3	1	1	1	1	7	226161	232700	0.261553	0.261203	eukaryotic	eukaryotic
126793.A5K132	3	1	1	1	1	7	2031769	1678597	0.456523	0.302857	eukaryotic	eukaryotic
126793.A5K433	3	1	1	1	1	7	3004885	1678597	0.445369	0.302857	eukaryotic	eukaryotic
126793.A5K620	3	1	1	1	1	7	1370937	1678597	0.442769	0.302857	eukaryotic	eukaryotic
126793.A5K7N6	3	1	1	1	1	7	1678597	1678597	0.45387	0.302857	eukaryotic	eukaryotic
126793.A5K7P4	3	1	1	1	1	7	1678597	1678597	0.45387	0.302857	eukaryotic	eukaryotic
126793.A5K8S0	3	1	1	1	1	7	3120418	1678597	0.429634	0.302857	eukaryotic	eukaryotic
126793.A5KB42	3	1	1	1	1	7	1678597	1678597	0.45387	0.302857	eukaryotic	eukaryotic
126793.A5KC08	3	1	1	1	1	7	876623	1678597	0.449661	0.302857	eukaryotic	eukaryotic
126793.A5KC67	3	1	1	1	1	7	1011128	1678597	0.439778	0.302857	eukaryotic	eukaryotic
126957.T1IIR6	3	1	1	1	1	7	627494	139452	0.34812	0.381613	eukaryotic	eukaryotic
126957.T1IJ10	3	1	1	1	1	7	184661	139452	0.334369	0.381613	eukaryotic	eukaryotic
126957.T1IJZ0	3	1	1	1	1	7	81988	139452	0.35149	0.381613	eukaryotic	eukaryotic
126957.T1IJZ1	3	1	1	1	1	7	81988	139452	0.35149	0.381613	eukaryotic	eukaryotic
126957.T1IKT6	3	1	1	1	1	7	75460	139452	0.354082	0.381613	eukaryotic	eukaryotic
126957.T1IMB1	3	1	1	1	1	7	129453	139452	0.343762	0.381613	eukaryotic	eukaryotic
126957.T1IWA4	3	1	1	1	1	7	646139	139452	0.330624	0.381613	eukaryotic	eukaryotic
126957.T1IZJ8	3	1	1	1	1	7	70041	139452	0.354464	0.381613	eukaryotic	eukaryotic
126957.T1J2I6	3	1	1	1	1	7	913934	139452	0.343623	0.381613	eukaryotic	eukaryotic
126957.T1J2J8	3	1	1	1	1	7	913934	139452	0.343623	0.381613	eukaryotic	eukaryotic
126957.T1J348	3	1	1	1	1	7	567149	139452	0.34152	0.381613	eukaryotic	eukaryotic
126957.T1J353	3	1	1	1	1	7	567149	139452	0.34152	0.381613	eukaryotic	eukaryotic
126957.T1J4Y8	3	1	1	1	1	7	1211296	139452	0.343146	0.381613	eukaryotic	eukaryotic
126957.T1J5T2	3	1	1	1	1	7	681752	139452	0.337564	0.381613	eukaryotic	eukaryotic
126957.T1J712	3	1	1	1	1	7	124955	139452	0.341291	0.381613	eukaryotic	eukaryotic
126957.T1J9I4	3	1	1	1	1	7	449816	139452	0.339661	0.381613	eukaryotic	eukaryotic
126957.T1JBI6	3	1	1	1	1	7	890881	139452	0.338329	0.381613	eukaryotic	eukaryotic
126957.T1JCL4	3	1	1	1	1	7	662827	139452	0.327212	0.381613	eukaryotic	eukaryotic
126957.T1JDI6	3	1	1	1	1	7	603278	139452	0.3407	0.381613	eukaryotic	eukaryotic
126957.T1JEM6	3	1	1	1	1	7	459528	139452	0.330613	0.381613	eukaryotic	eukaryotic
126957.T1JEU2	3	1	1	1	1	7	591455	139452	0.35437	0.381613	eukaryotic	eukaryotic
126957.T1JFI1	3	1	1	1	1	7	117243	139452	0.374956	0.381613	eukaryotic	eukaryotic
126957.T1JGS1	3	1	1	1	1	7	479787	139452	0.387728	0.381613	eukaryotic	eukaryotic
126957.T1JGS6	3	1	1	1	1	7	479787	139452	0.387728	0.381613	eukaryotic	eukaryotic
126957.T1JHZ9	3	1	1	1	1	7	418144	139452	0.335279	0.381613	eukaryotic	eukaryotic
126957.T1JIQ5	3	1	1	1	1	7	1344238	139452	0.331993	0.381613	eukaryotic	eukaryotic
126957.T1JJE3	3	1	1	1	1	7	110190	139452	0.335693	0.381613	eukaryotic	eukaryotic
126957.T1JKE3	3	1	1	1	1	7	81988	139452	0.35149	0.381613	eukaryotic	eukaryotic
126957.T1JL00	3	1	1	1	1	7	913934	139452	0.343623	0.381613	eukaryotic	eukaryotic
1291522.A0A059LKK1	3	1	1	1	1	7	3372	3037	0.613879	0.628175	eukaryotic	eukaryotic
1291522.A0A059LSA6	3	1	1	1	1	7	13142	3037	0.613073	0.628175	eukaryotic	eukaryotic
1296120.A0A1B9GPF5	3	1	1	1	1	7	466033	709379	0.518918	0.518275	eukaryotic	eukaryotic
1296120.A0A1B9GPM2	3	1	1	1	1	7	479196	709379	0.518024	0.518275	eukaryotic	eukaryotic
1296120.A0A1B9GU92	3	1	1	1	1	7	709379	709379	0.519199	0.518275	eukaryotic	eukaryotic
1296120.A0A1B9GUT7	3	1	1	1	1	7	777093	709379	0.519449	0.518275	eukaryotic	eukaryotic
1296120.A0A1B9GW05	3	1	1	1	1	7	787043	709379	0.51825	0.518275	eukaryotic	eukaryotic
1296120.A0A1B9GWP7	3	1	1	1	1	7	794851	709379	0.516753	0.518275	eukaryotic	eukaryotic
1296120.A0A1B9GY86	3	1	1	1	1	7	929515	709379	0.516482	0.518275	eukaryotic	eukaryotic
1296120.A0A1B9GZ53	3	1	1	1	1	7	1021252	709379	0.518255	0.518275	eukaryotic	eukaryotic
1296120.A0A1B9GZD6	3	1	1	1	1	7	1050523	709379	0.519096	0.518275	eukaryotic	eukaryotic
1296120.A0A1B9GZZ7	3	1	1	1	1	7	1050523	709379	0.519096	0.518275	eukaryotic	eukaryotic
1296120.A0A1B9H0T8	3	1	1	1	1	7	1098305	709379	0.516573	0.518275	eukaryotic	eukaryotic
1296120.A0A1B9H220	3	1	1	1	1	7	1143825	709379	0.518237	0.518275	eukaryotic	eukaryotic
1296120.A0A1B9H249	3	1	1	1	1	7	1143825	709379	0.518237	0.518275	eukaryotic	eukaryotic
1296120.A0A1B9H3R7	3	1	1	1	1	7	1516622	709379	0.518583	0.518275	eukaryotic	eukaryotic
130081.M2X7I9	3	1	1	1	1	7	309570	172323	0.379943	0.357655	eukaryotic	eukaryotic
130081.M2X9S1	3	1	1	1	1	7	89228	172323	0.38136	0.357655	eukaryotic	eukaryotic
130081.M2XFN2	3	1	1	1	1	7	160525	172323	0.37553	0.357655	eukaryotic	eukaryotic
130081.M2XL49	3	1	1	1	1	7	208298	172323	0.382049	0.357655	eukaryotic	eukaryotic
130081.M2XY78	3	1	1	1	1	7	153349	172323	0.357655	0.357655	eukaryotic	eukaryotic
130081.M2Y2S3	3	1	1	1	1	7	190680	172323	0.369389	0.357655	eukaryotic	eukaryotic
130081.M2Y4X0	3	1	1	1	1	7	208298	172323	0.382049	0.357655	eukaryotic	eukaryotic
130081.M2Y9W2	3	1	1	1	1	7	465834	172323	0.380743	0.357655	eukaryotic	eukaryotic
130081.M2YA99	3	1	1	1	1	7	465834	172323	0.380743	0.357655	eukaryotic	eukaryotic
1314962.A0A0L1KHU6	3	1	1	1	1	7	48699	57462	0.454835	0.440347	eukaryotic	eukaryotic
1314962.A0A0L1KHV7	3	1	1	1	1	7	48699	57462	0.454835	0.440347	eukaryotic	eukaryotic
1314962.A0A0L1KIL2	3	1	1	1	1	7	48699	57462	0.454835	0.440347	eukaryotic	eukaryotic
1314962.A0A0L1KIR1	3	1	1	1	1	7	51175	57462	0.477772	0.440347	eukaryotic	eukaryotic
1314962.A0A0L1KLF9	3	1	1	1	1	7	59069	57462	0.496487	0.440347	eukaryotic	eukaryotic
1314962.A0A0L1KVR2	3	1	1	1	1	7	120588	57462	0.476018	0.440347	eukaryotic	eukaryotic
13333.U5D0I9	3	1	1	1	1	7	5900638	4927028	0.334384	0.339754	eukaryotic	eukaryotic
13333.U5D7G9	3	1	1	1	1	7	4818898	4927028	0.376569	0.339754	eukaryotic	eukaryotic
13333.U5DAW0	3	1	1	1	1	7	3857697	4927028	0.337555	0.339754	eukaryotic	eukaryotic
13333.W1NDX9	3	1	1	1	1	7	10537364	4927028	0.391306	0.339754	eukaryotic	eukaryotic
13333.W1NHD7	3	1	1	1	1	7	9389331	4927028	0.336204	0.339754	eukaryotic	eukaryotic
13333.W1NK02	3	1	1	1	1	7	6666512	4927028	0.34015	0.339754	eukaryotic	eukaryotic
13333.W1NS55	3	1	1	1	1	7	3666728	4927028	0.351644	0.339754	eukaryotic	eukaryotic
13333.W1P062	3	1	1	1	1	7	11522363	4927028	0.33695	0.339754	eukaryotic	eukaryotic
134013.W6KV51	3	1	1	1	1	7	2329562	1237165	0.404549	0.39934	eukaryotic	eukaryotic
134013.W6KVX6	3	1	1	1	1	7	2329562	1237165	0.404549	0.39934	eukaryotic	eukaryotic
134013.W6KY65	3	1	1	1	1	7	2329562	1237165	0.404549	0.39934	eukaryotic	eukaryotic
134013.W6KYZ9	3	1	1	1	1	7	2061618	1237165	0.426954	0.39934	eukaryotic	eukaryotic
134013.W6L4I6	3	1	1	1	1	7	1647181	1237165	0.421143	0.39934	eukaryotic	eukaryotic
134013.W6L7R1	3	1	1	1	1	7	1214750	1237165	0.406719	0.39934	eukaryotic	eukaryotic
134013.W6LC94	3	1	1	1	1	7	687303	1237165	0.442167	0.39934	eukaryotic	eukaryotic
134013.W6LES8	3	1	1	1	1	7	1974835	1237165	0.409777	0.39934	eukaryotic	eukaryotic
134013.W6LGG4	3	1	1	1	1	7	1060350	1237165	0.417856	0.39934	eukaryotic	eukaryotic
13616.F6UGX0	3	1	1	1	1	7	527952103	527952103	0.363747	0.425968	eukaryotic	eukaryotic
13616.F6V9Y7	3	1	1	1	1	7	527952103	527952103	0.363747	0.425968	eukaryotic	eukaryotic
13616.F6VFX4	3	1	1	1	1	7	748055162	527952103	0.370709	0.425968	eukaryotic	eukaryotic
13616.F7BRL6	3	1	1	1	1	7	435153694	527952103	0.365892	0.425968	eukaryotic	eukaryotic
13616.F7CNU8	3	1	1	1	1	7	312544903	527952103	0.367545	0.425968	eukaryotic	eukaryotic
13616.F7E5C1	3	1	1	1	1	7	748055162	527952103	0.370709	0.425968	eukaryotic	eukaryotic
13616.F7EQC4	3	1	1	1	1	7	292091737	527952103	0.369846	0.425968	eukaryotic	eukaryotic
13616.F7G057	3	1	1	1	1	7	541556284	527952103	0.369787	0.425968	eukaryotic	eukaryotic
13616.K7DZJ3	3	1	1	1	1	7	292091737	527952103	0.369846	0.425968	eukaryotic	eukaryotic
13616.K7E3A1	3	1	1	1	1	7	435153694	527952103	0.365892	0.425968	eukaryotic	eukaryotic
145388.A0A0D2KA48	3	1	1	1	1	7	47243	15660	0.624727	0.634587	eukaryotic	eukaryotic
145388.A0A0D2KX20	3	1	1	1	1	7	14273	15660	0.609122	0.634587	eukaryotic	eukaryotic
145388.A0A0D2LIH2	3	1	1	1	1	7	37303	15660	0.653862	0.634587	eukaryotic	eukaryotic
145388.A0A0D2M8W3	3	1	1	1	1	7	13999	15660	0.635403	0.634587	eukaryotic	eukaryotic
145388.A0A0D2MYG3	3	1	1	1	1	7	13015	15660	0.588398	0.634587	eukaryotic	eukaryotic
145388.A0A0D2N2R1	3	1	1	1	1	7	41518	15660	0.639458	0.634587	eukaryotic	eukaryotic
1460289.A0A0M0J3J2	3	1	1	1	1	7	48999	24115	0.616931	0.633453	eukaryotic	eukaryotic
1460289.A0A0M0J5T3	3	1	1	1	1	7	39930	24115	0.632582	0.633453	eukaryotic	eukaryotic
1460289.A0A0M0J7F8	3	1	1	1	1	7	33043	24115	0.616954	0.633453	eukaryotic	eukaryotic
1460289.A0A0M0J7N1	3	1	1	1	1	7	38873	24115	0.634528	0.633453	eukaryotic	eukaryotic
1460289.A0A0M0J7U3	3	1	1	1	1	7	38793	24115	0.647024	0.633453	eukaryotic	eukaryotic
1460289.A0A0M0J979	3	1	1	1	1	7	23169	24115	0.626527	0.633453	eukaryotic	eukaryotic
1460289.A0A0M0J9P1	3	1	1	1	1	7	43830	24115	0.61823	0.633453	eukaryotic	eukaryotic
1460289.A0A0M0JCH7	3	1	1	1	1	7	34688	24115	0.63411	0.633453	eukaryotic	eukaryotic
1460289.A0A0M0JED5	3	1	1	1	1	7	31052	24115	0.640538	0.633453	eukaryotic	eukaryotic
1460289.A0A0M0JER0	3	1	1	1	1	7	28918	24115	0.620513	0.633453	eukaryotic	eukaryotic
1460289.A0A0M0JHT2	3	1	1	1	1	7	33179	24115	0.635975	0.633453	eukaryotic	eukaryotic
1460289.A0A0M0JIP0	3	1	1	1	1	7	87022	24115	0.63207	0.633453	eukaryotic	eukaryotic
1460289.A0A0M0JIT8	3	1	1	1	1	7	35377	24115	0.659242	0.633453	eukaryotic	eukaryotic
1460289.A0A0M0JIU7	3	1	1	1	1	7	24356	24115	0.623419	0.633453	eukaryotic	eukaryotic
1460289.A0A0M0JK97	3	1	1	1	1	7	21299	24115	0.60369	0.633453	eukaryotic	eukaryotic
1460289.A0A0M0JMK7	3	1	1	1	1	7	17321	24115	0.626696	0.633453	eukaryotic	eukaryotic
1460289.A0A0M0JQ12	3	1	1	1	1	7	25068	24115	0.643929	0.633453	eukaryotic	eukaryotic
1460289.A0A0M0JR08	3	1	1	1	1	7	28674	24115	0.654914	0.633453	eukaryotic	eukaryotic
1460289.A0A0M0JVM9	3	1	1	1	1	7	15970	24115	0.62392	0.633453	eukaryotic	eukaryotic
1460289.A0A0M0JW73	3	1	1	1	1	7	35741	24115	0.627207	0.633453	eukaryotic	eukaryotic
1460289.A0A0M0JYA9	3	1	1	1	1	7	22376	24115	0.621961	0.633453	eukaryotic	eukaryotic
1460289.A0A0M0K488	3	1	1	1	1	7	23135	24115	0.645861	0.633453	eukaryotic	eukaryotic
1460289.A0A0M0K7F7	3	1	1	1	1	7	21232	24115	0.637434	0.633453	eukaryotic	eukaryotic
1460289.A0A0M0LRD5	3	1	1	1	1	7	13427	24115	0.602592	0.633453	eukaryotic	eukaryotic
1460289.A0A0M0LRP9	3	1	1	1	1	7	14142	24115	0.622472	0.633453	eukaryotic	eukaryotic
1485682.A0A098VR89	3	1	1	1	1	7	44251	32180	0.440171	0.403099	eukaryotic	eukaryotic
1485682.A0A098VRB5	3	1	1	1	1	7	39433	32180	0.440114	0.403099	eukaryotic	eukaryotic
1519565.A0A1Z5JCQ8	3	1	1	1	1	7	497172	330810	0.455066	0.455066	eukaryotic	eukaryotic
1519565.A0A1Z5JJ25	3	1	1	1	1	7	603766	330810	0.446671	0.455066	eukaryotic	eukaryotic
1519565.A0A1Z5JQQ5	3	1	1	1	1	7	451832	330810	0.462736	0.455066	eukaryotic	eukaryotic
1519565.A0A1Z5JT63	3	1	1	1	1	7	904707	330810	0.448487	0.455066	eukaryotic	eukaryotic
1519565.A0A1Z5JTE9	3	1	1	1	1	7	904707	330810	0.448487	0.455066	eukaryotic	eukaryotic
1519565.A0A1Z5JU50	3	1	1	1	1	7	336278	330810	0.455816	0.455066	eukaryotic	eukaryotic
1519565.A0A1Z5JU99	3	1	1	1	1	7	331160	330810	0.447811	0.455066	eukaryotic	eukaryotic
1519565.A0A1Z5JUP1	3	1	1	1	1	7	206433	330810	0.465861	0.455066	eukaryotic	eukaryotic
1519565.A0A1Z5JVZ7	3	1	1	1	1	7	553718	330810	0.461731	0.455066	eukaryotic	eukaryotic
1519565.A0A1Z5JZZ2	3	1	1	1	1	7	704127	330810	0.462189	0.455066	eukaryotic	eukaryotic
1519565.A0A1Z5K3U2	3	1	1	1	1	7	579597	330810	0.451817	0.455066	eukaryotic	eukaryotic
1519565.A0A1Z5K436	3	1	1	1	1	7	609190	330810	0.451078	0.455066	eukaryotic	eukaryotic
1519565.A0A1Z5K4X7	3	1	1	1	1	7	609190	330810	0.451078	0.455066	eukaryotic	eukaryotic
1519565.A0A1Z5K8A3	3	1	1	1	1	7	514141	330810	0.462984	0.455066	eukaryotic	eukaryotic
1519565.A0A1Z5K9U5	3	1	1	1	1	7	368576	330810	0.461294	0.455066	eukaryotic	eukaryotic
1519565.A0A1Z5KDJ6	3	1	1	1	1	7	755833	330810	0.45255	0.455066	eukaryotic	eukaryotic
1519565.A0A1Z5KDK2	3	1	1	1	1	7	755833	330810	0.45255	0.455066	eukaryotic	eukaryotic
1519565.A0A1Z5KFS1	3	1	1	1	1	7	245678	330810	0.441395	0.455066	eukaryotic	eukaryotic
1519565.A0A1Z5KG88	3	1	1	1	1	7	541043	330810	0.45455	0.455066	eukaryotic	eukaryotic
1519565.A0A1Z5KH56	3	1	1	1	1	7	904707	330810	0.448487	0.455066	eukaryotic	eukaryotic
1519565.A0A1Z5KIZ3	3	1	1	1	1	7	440185	330810	0.464064	0.455066	eukaryotic	eukaryotic
1519565.A0A1Z5KT21	3	1	1	1	1	7	597693	330810	0.457044	0.455066	eukaryotic	eukaryotic
1519565.A0A1Z5KTZ1	3	1	1	1	1	7	597693	330810	0.457044	0.455066	eukaryotic	eukaryotic
154548.SymbC1.scaffold1622.14	3	1	1	1	1	7	162402	98035	0.411547	0.399518	eukaryotic	eukaryotic
157538.A0A0M9FT94	3	1	1	1	1	7	483363	910097	0.573234	0.565974	eukaryotic	eukaryotic
157538.A0A0M9FW01	3	1	1	1	1	7	618648	910097	0.560624	0.565974	eukaryotic	eukaryotic
157538.A0A0M9FXQ8	3	1	1	1	1	7	713074	910097	0.572276	0.565974	eukaryotic	eukaryotic
157538.A0A0M9FZ82	3	1	1	1	1	7	820049	910097	0.571338	0.565974	eukaryotic	eukaryotic
157538.A0A0M9G6K5	3	1	1	1	1	7	1967655	910097	0.569293	0.565974	eukaryotic	eukaryotic
157538.A0A0M9G7U4	3	1	1	1	1	7	1967655	910097	0.569293	0.565974	eukaryotic	eukaryotic
157538.A0A0N0DSJ8	3	1	1	1	1	7	570706	910097	0.576085	0.565974	eukaryotic	eukaryotic
157538.A0A0N0DTP6	3	1	1	1	1	7	726779	910097	0.573754	0.565974	eukaryotic	eukaryotic
157538.A0A0N0DV52	3	1	1	1	1	7	910097	910097	0.553258	0.565974	eukaryotic	eukaryotic
157538.A0A0N0DWW7	3	1	1	1	1	7	1491554	910097	0.553429	0.565974	eukaryotic	eukaryotic
157538.A0A0N0DX85	3	1	1	1	1	7	1863169	910097	0.560639	0.565974	eukaryotic	eukaryotic
157538.A0A0N1J4Z3	3	1	1	1	1	7	1478622	910097	0.548871	0.565974	eukaryotic	eukaryotic
157538.A0A0N1J5J5	3	1	1	1	1	7	2995729	910097	0.548786	0.565974	eukaryotic	eukaryotic
159749.E7BWN3	3	1	1	1	1	7	141791	3635	0.303947	0.52674	eukaryotic	eukaryotic
159749.K0RI16	3	1	1	1	1	7	7111	3635	0.520039	0.52674	eukaryotic	eukaryotic
159749.K0SUD5	3	1	1	1	1	7	8778	3635	0.574277	0.52674	eukaryotic	eukaryotic
159749.K0TFT7	3	1	1	1	1	7	12463	3635	0.501886	0.52674	eukaryotic	eukaryotic
1775427.g2470.t1	3	1	1	1	1	7	346044	83971	0.557455	0.541442	eukaryotic	eukaryotic
1775427.g5049.t1	3	1	1	1	1	7	114203	83971	0.550835	0.541442	eukaryotic	eukaryotic
1775427.g5244.t1	3	1	1	1	1	7	74739	83971	0.53941	0.541442	eukaryotic	eukaryotic
184922.A8B9V6	3	1	1	1	1	7	1886628	1312035	0.496906	0.509942	eukaryotic	eukaryotic
184922.A8BBJ5	3	1	1	1	1	7	1312035	1312035	0.485901	0.509942	eukaryotic	eukaryotic
184922.A8BBJ7	3	1	1	1	1	7	1312035	1312035	0.485901	0.509942	eukaryotic	eukaryotic
184922.A8BEL5	3	1	1	1	1	7	1886628	1312035	0.496906	0.509942	eukaryotic	eukaryotic
184922.A8BLK0	3	1	1	1	1	7	1227665	1312035	0.487918	0.509942	eukaryotic	eukaryotic
184922.A8BRC3	3	1	1	1	1	7	1415970	1312035	0.48953	0.509942	eukaryotic	eukaryotic
184922.E2RU19	3	1	1	1	1	7	1886628	1312035	0.496906	0.509942	eukaryotic	eukaryotic
185431.P86927	3	1	1	1	1	7	3057548	2481191	0.452467	0.46269	eukaryotic	eukaryotic
185431.Q382D8	3	1	1	1	1	7	5261802	2481191	0.468951	0.46269	eukaryotic	eukaryotic
185431.Q384L3	3	1	1	1	1	7	5261802	2481191	0.468951	0.46269	eukaryotic	eukaryotic
185431.Q385F6	3	1	1	1	1	7	5261802	2481191	0.468951	0.46269	eukaryotic	eukaryotic
185431.Q385S9	3	1	1	1	1	7	5261802	2481191	0.468951	0.46269	eukaryotic	eukaryotic
185431.Q386D9	3	1	1	1	1	7	5261802	2481191	0.468951	0.46269	eukaryotic	eukaryotic
185431.Q387X6	3	1	1	1	1	7	4054026	2481191	0.476485	0.46269	eukaryotic	eukaryotic
185431.Q388C5	3	1	1	1	1	7	4054026	2481191	0.476485	0.46269	eukaryotic	eukaryotic
185431.Q38AG5	3	1	1	1	1	7	4054026	2481191	0.476485	0.46269	eukaryotic	eukaryotic
185431.Q38DH5	3	1	1	1	1	7	3057548	2481191	0.452467	0.46269	eukaryotic	eukaryotic
185431.Q38EJ2	3	1	1	1	1	7	3057548	2481191	0.452467	0.46269	eukaryotic	eukaryotic
185431.Q57U92	3	1	1	1	1	7	1608199	2481191	0.459799	0.46269	eukaryotic	eukaryotic
185431.Q57VU2	3	1	1	1	1	7	2205234	2481191	0.469716	0.46269	eukaryotic	eukaryotic
185431.Q57X05	3	1	1	1	1	7	2481191	2481191	0.473702	0.46269	eukaryotic	eukaryotic
185431.Q57X97	3	1	1	1	1	7	2205234	2481191	0.469716	0.46269	eukaryotic	eukaryotic
185431.Q57YI9	3	1	1	1	1	7	2481191	2481191	0.473702	0.46269	eukaryotic	eukaryotic
185431.Q57YZ9	3	1	1	1	1	7	2481191	2481191	0.473702	0.46269	eukaryotic	eukaryotic
185431.Q57ZS7	3	1	1	1	1	7	1608199	2481191	0.459799	0.46269	eukaryotic	eukaryotic
185431.Q583P4	3	1	1	1	1	7	1618916	2481191	0.452474	0.46269	eukaryotic	eukaryotic
1890364.A0A2P6MSU1	3	1	1	1	1	7	144068	115215	0.477913	0.475377	eukaryotic	eukaryotic
1890364.A0A2P6NC13	3	1	1	1	1	7	83225	115215	0.485263	0.475377	eukaryotic	eukaryotic
1890364.A0A2P6NGE8	3	1	1	1	1	7	95885	115215	0.48165	0.475377	eukaryotic	eukaryotic
1890364.A0A2P6NMQ6	3	1	1	1	1	7	140084	115215	0.481568	0.475377	eukaryotic	eukaryotic
1890364.A0A2P6NSA4	3	1	1	1	1	7	189435	115215	0.483153	0.475377	eukaryotic	eukaryotic
1890364.A0A2P6NVS6	3	1	1	1	1	7	274813	115215	0.481222	0.475377	eukaryotic	eukaryotic
1890364.A0A2P6NXL0	3	1	1	1	1	7	266591	115215	0.487725	0.475377	eukaryotic	eukaryotic
1890364.A0A2P6NZZ1	3	1	1	1	1	7	366691	115215	0.481138	0.475377	eukaryotic	eukaryotic
1890364.A0A2P6NZZ7	3	1	1	1	1	7	366691	115215	0.481138	0.475377	eukaryotic	eukaryotic
214684.P0CO64	3	1	1	1	1	7	2105743	1438951	0.483843	0.485405	eukaryotic	eukaryotic
214684.P0CQ68	3	1	1	1	1	7	2300534	1438951	0.485919	0.485405	eukaryotic	eukaryotic
214684.Q5K7U0	3	1	1	1	1	7	788000	1438951	0.485942	0.485405	eukaryotic	eukaryotic
214684.Q5K8B0	3	1	1	1	1	7	906720	1438951	0.48414	0.485405	eukaryotic	eukaryotic
214684.Q5KCE8	3	1	1	1	1	7	1194301	1438951	0.485531	0.485405	eukaryotic	eukaryotic
214684.Q5KDH4	3	1	1	1	1	7	1347794	1438951	0.485225	0.485405	eukaryotic	eukaryotic
214684.Q5KDT3	3	1	1	1	1	7	1347794	1438951	0.485225	0.485405	eukaryotic	eukaryotic
214684.Q5KGG3	3	1	1	1	1	7	1507551	1438951	0.487476	0.485405	eukaryotic	eukaryotic
214684.Q5KGK0	3	1	1	1	1	7	1507551	1438951	0.487476	0.485405	eukaryotic	eukaryotic
214684.Q5KIF9	3	1	1	1	1	7	1783082	1438951	0.484868	0.485405	eukaryotic	eukaryotic
214684.Q5KIG6	3	1	1	1	1	7	1783082	1438951	0.484868	0.485405	eukaryotic	eukaryotic
214684.Q5KJR0	3	1	1	1	1	7	2105743	1438951	0.483843	0.485405	eukaryotic	eukaryotic
214684.Q5KLM1	3	1	1	1	1	7	1632308	1438951	0.484159	0.485405	eukaryotic	eukaryotic
214684.Q5KN82	3	1	1	1	1	7	2300534	1438951	0.485919	0.485405	eukaryotic	eukaryotic
214684.Q5KNR3	3	1	1	1	1	7	2300534	1438951	0.485919	0.485405	eukaryotic	eukaryotic
214684.Q5KP58	3	1	1	1	1	7	2300534	1438951	0.485919	0.485405	eukaryotic	eukaryotic
214687.M0RFZ5	3	1	1	1	1	7	33665773	28617405	0.323007	0.380343	eukaryotic	eukaryotic
214687.M0RFZ6	3	1	1	1	1	7	33665773	28617405	0.323007	0.380343	eukaryotic	eukaryotic
214687.M0RGS2	3	1	1	1	1	7	33665773	28617405	0.323007	0.380343	eukaryotic	eukaryotic
214687.M0RLA8	3	1	1	1	1	7	33665773	28617405	0.323007	0.380343	eukaryotic	eukaryotic
214687.M0RPV2	3	1	1	1	1	7	25514025	28617405	0.345654	0.380343	eukaryotic	eukaryotic
214687.M0RS96	3	1	1	1	1	7	25514025	28617405	0.345654	0.380343	eukaryotic	eukaryotic
214687.M0RWI8	3	1	1	1	1	7	27573630	28617405	0.337821	0.380343	eukaryotic	eukaryotic
214687.M0RZZ7	3	1	1	1	1	7	27573630	28617405	0.337821	0.380343	eukaryotic	eukaryotic
214687.M0S7D9	3	1	1	1	1	7	22054698	28617405	0.338957	0.380343	eukaryotic	eukaryotic
214687.M0SIY2	3	1	1	1	1	7	30470408	28617405	0.340217	0.380343	eukaryotic	eukaryotic
214687.M0SMR0	3	1	1	1	1	7	30051517	28617405	0.34299	0.380343	eukaryotic	eukaryotic
214687.M0SPN0	3	1	1	1	1	7	34899180	28617405	0.339327	0.380343	eukaryotic	eukaryotic
214687.M0SPP0	3	1	1	1	1	7	30051517	28617405	0.34299	0.380343	eukaryotic	eukaryotic
214687.M0SV59	3	1	1	1	1	7	29377370	28617405	0.340893	0.380343	eukaryotic	eukaryotic
214687.M0SXI6	3	1	1	1	1	7	29377370	28617405	0.340893	0.380343	eukaryotic	eukaryotic
214687.M0TK46	3	1	1	1	1	7	28617405	28617405	0.33166	0.380343	eukaryotic	eukaryotic
214687.M0TML2	3	1	1	1	1	7	35439740	28617405	0.333055	0.380343	eukaryotic	eukaryotic
214687.M0TTX4	3	1	1	1	1	7	35439740	28617405	0.333055	0.380343	eukaryotic	eukaryotic
214687.M0TYW1	3	1	1	1	1	7	34148864	28617405	0.324893	0.380343	eukaryotic	eukaryotic
214687.M0TZE3	3	1	1	1	1	7	34148864	28617405	0.324893	0.380343	eukaryotic	eukaryotic
225164.V3ZTB4	3	1	1	1	1	7	1823452	1870056	0.292649	0.278481	eukaryotic	eukaryotic
225164.V4A1T3	3	1	1	1	1	7	1846361	1870056	0.309361	0.278481	eukaryotic	eukaryotic
225164.V4A217	3	1	1	1	1	7	7124671	1870056	0.291924	0.278481	eukaryotic	eukaryotic
225164.V4A2Y4	3	1	1	1	1	7	2536314	1870056	0.275462	0.278481	eukaryotic	eukaryotic
225164.V4A700	3	1	1	1	1	7	2314329	1870056	0.285045	0.278481	eukaryotic	eukaryotic
225164.V4AQ46	3	1	1	1	1	7	3719821	1870056	0.259043	0.278481	eukaryotic	eukaryotic
225164.V4B407	3	1	1	1	1	7	9386849	1870056	0.296344	0.278481	eukaryotic	eukaryotic
2315210.A0A2R5G770	3	1	1	1	1	7	279658	236569	0.564318	0.551111	eukaryotic	eukaryotic
2315210.A0A2R5GHQ2	3	1	1	1	1	7	303034	236569	0.565953	0.551111	eukaryotic	eukaryotic
2315210.A0A2R5GKU4	3	1	1	1	1	7	139858	236569	0.557394	0.551111	eukaryotic	eukaryotic
237561.A0A1D8PHP6	3	1	1	1	1	7	2231884	2231884	0.334333	0.334244	eukaryotic	eukaryotic
237561.A0A1D8PI71	3	1	1	1	1	7	2231884	2231884	0.334333	0.334244	eukaryotic	eukaryotic
237561.A0A1D8PJL5	3	1	1	1	1	7	1799299	2231884	0.334156	0.334244	eukaryotic	eukaryotic
237561.A0A1D8PL06	3	1	1	1	1	7	1603260	2231884	0.333682	0.334244	eukaryotic	eukaryotic
237561.A0A1D8PM62	3	1	1	1	1	7	1603260	2231884	0.333682	0.334244	eukaryotic	eukaryotic
237561.A0A1D8PU93	3	1	1	1	1	7	2286238	2231884	0.337405	0.334244	eukaryotic	eukaryotic
237561.Q59SI6	3	1	1	1	1	7	1603260	2231884	0.333682	0.334244	eukaryotic	eukaryotic
237561.Q59VG1	3	1	1	1	1	7	3188342	2231884	0.332731	0.334244	eukaryotic	eukaryotic
237561.Q5A2A5	3	1	1	1	1	7	3188342	2231884	0.332731	0.334244	eukaryotic	eukaryotic
237561.Q5A4Z2	3	1	1	1	1	7	1190846	2231884	0.332815	0.334244	eukaryotic	eukaryotic
237561.Q5A5P8	3	1	1	1	1	7	2231884	2231884	0.334333	0.334244	eukaryotic	eukaryotic
237561.Q5ADX5	3	1	1	1	1	7	1799299	2231884	0.334156	0.334244	eukaryotic	eukaryotic
237631.A0A0D1BVD8	3	1	1	1	1	7	470506	884985	0.541092	0.539902	eukaryotic	eukaryotic
237631.A0A0D1C0X1	3	1	1	1	1	7	606073	884985	0.539095	0.539902	eukaryotic	eukaryotic
237631.A0A0D1C3I0	3	1	1	1	1	7	692355	884985	0.542075	0.539902	eukaryotic	eukaryotic
237631.A0A0D1CD13	3	1	1	1	1	7	1879392	884985	0.538384	0.539902	eukaryotic	eukaryotic
237631.A0A0D1CLN0	3	1	1	1	1	7	650985	884985	0.539868	0.539902	eukaryotic	eukaryotic
237631.A0A0D1DPL5	3	1	1	1	1	7	470506	884985	0.541092	0.539902	eukaryotic	eukaryotic
237631.A0A0D1DT93	3	1	1	1	1	7	606073	884985	0.539095	0.539902	eukaryotic	eukaryotic
237631.A0A0D1DVJ2	3	1	1	1	1	7	560725	884985	0.542376	0.539902	eukaryotic	eukaryotic
237631.A0A0D1DVJ8	3	1	1	1	1	7	650985	884985	0.539868	0.539902	eukaryotic	eukaryotic
237631.A0A0D1E2D9	3	1	1	1	1	7	1642071	884985	0.536853	0.539902	eukaryotic	eukaryotic
237631.A0A0D1E3N7	3	1	1	1	1	7	957189	884985	0.540635	0.539902	eukaryotic	eukaryotic
237631.A0A0D1E528	3	1	1	1	1	7	1642071	884985	0.536853	0.539902	eukaryotic	eukaryotic
237631.A0A0D1E6I1	3	1	1	1	1	7	1393420	884985	0.537292	0.539902	eukaryotic	eukaryotic
237631.A0A0D1E6Y0	3	1	1	1	1	7	884985	884985	0.544049	0.539902	eukaryotic	eukaryotic
237631.A0A0D1E7S0	3	1	1	1	1	7	1879392	884985	0.538384	0.539902	eukaryotic	eukaryotic
237631.P41511	3	1	1	1	1	7	884985	884985	0.544049	0.539902	eukaryotic	eukaryotic
237631.Q92459	3	1	1	1	1	7	611468	884985	0.540799	0.539902	eukaryotic	eukaryotic
246409.I1BIU6	3	1	1	1	1	7	5735492	3104120	0.350449	0.351557	eukaryotic	eukaryotic
246409.I1BMS3	3	1	1	1	1	7	5735492	3104120	0.350449	0.351557	eukaryotic	eukaryotic
246409.I1BPZ7	3	1	1	1	1	7	5107422	3104120	0.349397	0.351557	eukaryotic	eukaryotic
246409.I1BQX4	3	1	1	1	1	7	5107422	3104120	0.349397	0.351557	eukaryotic	eukaryotic
246409.I1BR04	3	1	1	1	1	7	5107422	3104120	0.349397	0.351557	eukaryotic	eukaryotic
246409.I1BT36	3	1	1	1	1	7	5107422	3104120	0.349397	0.351557	eukaryotic	eukaryotic
246409.I1BWH0	3	1	1	1	1	7	3411801	3104120	0.349891	0.351557	eukaryotic	eukaryotic
246409.I1BY28	3	1	1	1	1	7	3274888	3104120	0.351652	0.351557	eukaryotic	eukaryotic
246409.I1C2G9	3	1	1	1	1	7	3273656	3104120	0.3349	0.351557	eukaryotic	eukaryotic
246409.I1C2J7	3	1	1	1	1	7	3273656	3104120	0.3349	0.351557	eukaryotic	eukaryotic
246409.I1C700	3	1	1	1	1	7	3104120	3104120	0.344536	0.351557	eukaryotic	eukaryotic
246409.I1C9L4	3	1	1	1	1	7	2712544	3104120	0.341607	0.351557	eukaryotic	eukaryotic
246409.I1CAS5	3	1	1	1	1	7	2362745	3104120	0.35334	0.351557	eukaryotic	eukaryotic
246409.I1CBU2	3	1	1	1	1	7	2362745	3104120	0.35334	0.351557	eukaryotic	eukaryotic
246409.I1CJJ9	3	1	1	1	1	7	1651896	3104120	0.351474	0.351557	eukaryotic	eukaryotic
259920.XP_020367748.1	3	1	1	1	1	7	153222	144423	0.433946	0.425004	eukaryotic	eukaryotic
259920.XP_020372333.1	3	1	1	1	1	7	177513	144423	0.389904	0.425004	eukaryotic	eukaryotic
259920.XP_020377221.1	3	1	1	1	1	7	76740	144423	0.435496	0.425004	eukaryotic	eukaryotic
266149.A0A0V0QE01	3	1	1	1	1	7	1054568	367842	0.185075	0.187665	eukaryotic	eukaryotic
266149.A0A0V0QMF3	3	1	1	1	1	7	452813	367842	0.183042	0.187665	eukaryotic	eukaryotic
2769.CCP38092	3	1	1	1	1	7	180087	242695	0.287278	0.522976	eukaryotic	eukaryotic
2769.CDF32709	3	1	1	1	1	7	277727	242695	0.525408	0.522976	eukaryotic	eukaryotic
2769.CDF32772	3	1	1	1	1	7	272143	242695	0.540955	0.522976	eukaryotic	eukaryotic
2769.CDF34679	3	1	1	1	1	7	196613	242695	0.541958	0.522976	eukaryotic	eukaryotic
2769.CDF35709	3	1	1	1	1	7	173328	242695	0.523689	0.522976	eukaryotic	eukaryotic
2769.CDF35765	3	1	1	1	1	7	172212	242695	0.541832	0.522976	eukaryotic	eukaryotic
2769.CDF35932	3	1	1	1	1	7	166720	242695	0.537128	0.522976	eukaryotic	eukaryotic
2769.CDF39016	3	1	1	1	1	7	830469	242695	0.517142	0.522976	eukaryotic	eukaryotic
2769.CDF39626	3	1	1	1	1	7	412375	242695	0.527583	0.522976	eukaryotic	eukaryotic
2769.CDF41030	3	1	1	1	1	7	333639	242695	0.509605	0.522976	eukaryotic	eukaryotic
2769.CDF41361	3	1	1	1	1	7	308000	242695	0.532497	0.522976	eukaryotic	eukaryotic
2769.CDF77540	3	1	1	1	1	7	506328	242695	0.532224	0.522976	eukaryotic	eukaryotic
28005.S9TTW9	3	1	1	1	1	7	96712	23371	0.584529	0.539502	eukaryotic	eukaryotic
28005.S9U558	3	1	1	1	1	7	15646	23371	0.567941	0.539502	eukaryotic	eukaryotic
28005.S9UCZ6	3	1	1	1	1	7	17027	23371	0.582839	0.539502	eukaryotic	eukaryotic
28005.S9UEK1	3	1	1	1	1	7	36876	23371	0.616363	0.539502	eukaryotic	eukaryotic
28005.S9UGB4	3	1	1	1	1	7	36742	23371	0.586032	0.539502	eukaryotic	eukaryotic
28005.S9UQE6	3	1	1	1	1	7	30521	23371	0.643622	0.539502	eukaryotic	eukaryotic
28005.S9UYJ0	3	1	1	1	1	7	21634	23371	0.469908	0.539502	eukaryotic	eukaryotic
28005.S9V7U5	3	1	1	1	1	7	21634	23371	0.469908	0.539502	eukaryotic	eukaryotic
28005.S9VL27	3	1	1	1	1	7	22293	23371	0.593236	0.539502	eukaryotic	eukaryotic
28005.S9VVJ7	3	1	1	1	1	7	21634	23371	0.469908	0.539502	eukaryotic	eukaryotic
28005.S9W488	3	1	1	1	1	7	36742	23371	0.586032	0.539502	eukaryotic	eukaryotic
28005.S9W9C1	3	1	1	1	1	7	51629	23371	0.577466	0.539502	eukaryotic	eukaryotic
28005.S9WBE5	3	1	1	1	1	7	51629	23371	0.577466	0.539502	eukaryotic	eukaryotic
280699.M1URK9	3	1	1	1	1	7	839708	859120	0.551108	0.549151	eukaryotic	eukaryotic
280699.M1UTH2	3	1	1	1	1	7	866984	859120	0.547894	0.549151	eukaryotic	eukaryotic
280699.M1VAF2	3	1	1	1	1	7	1232259	859120	0.553124	0.549151	eukaryotic	eukaryotic
280699.M1VBY5	3	1	1	1	1	7	1282940	859120	0.551693	0.549151	eukaryotic	eukaryotic
280699.M1VEY8	3	1	1	1	1	7	902901	859120	0.54915	0.549151	eukaryotic	eukaryotic
280699.M1VI08	3	1	1	1	1	7	859120	859120	0.550021	0.549151	eukaryotic	eukaryotic
280699.M1VIF9	3	1	1	1	1	7	859120	859120	0.550021	0.549151	eukaryotic	eukaryotic
284813.Q8SQM0	3	1	1	1	1	7	251003	220295	0.465473	0.472248	eukaryotic	eukaryotic
284813.Q8SQZ6	3	1	1	1	1	7	262798	220295	0.473428	0.472248	eukaryotic	eukaryotic
284813.Q8SR03	3	1	1	1	1	7	262798	220295	0.473428	0.472248	eukaryotic	eukaryotic
284813.Q8SR66	3	1	1	1	1	7	262798	220295	0.473428	0.472248	eukaryotic	eukaryotic
284813.Q8SSC4	3	1	1	1	1	7	194440	220295	0.469322	0.472248	eukaryotic	eukaryotic
284813.Q8SSI2	3	1	1	1	1	7	197427	220295	0.466294	0.472248	eukaryotic	eukaryotic
284813.Q8SSL9	3	1	1	1	1	7	209983	220295	0.493307	0.472248	eukaryotic	eukaryotic
284813.Q8SWJ6	3	1	1	1	1	7	209983	220295	0.493307	0.472248	eukaryotic	eukaryotic
2880.D7FJG6	3	1	1	1	1	7	5807720	3939082	0.532722	0.52317	eukaryotic	eukaryotic
2880.D7FMZ4	3	1	1	1	1	7	2246854	3939082	0.517608	0.52317	eukaryotic	eukaryotic
2880.D7FYW5	3	1	1	1	1	7	4484618	3939082	0.524085	0.52317	eukaryotic	eukaryotic
2898.AEA38967	3	1	1	1	1	7	160190	160190	0.260928	0.260928	eukaryotic	eukaryotic
2898.AEA39075	3	1	1	1	1	7	149540	160190	0.26843	0.260928	eukaryotic	eukaryotic
2903.R1DDU0	3	1	1	1	1	7	1185518	404809	0.608159	0.634146	eukaryotic	eukaryotic
2903.R1DKB5	3	1	1	1	1	7	1211353	404809	0.614151	0.634146	eukaryotic	eukaryotic
2903.R1DPB5	3	1	1	1	1	7	618385	404809	0.643599	0.634146	eukaryotic	eukaryotic
2903.R1DQ22	3	1	1	1	1	7	408688	404809	0.627819	0.634146	eukaryotic	eukaryotic
2903.R1DQZ8	3	1	1	1	1	7	398280	404809	0.644798	0.634146	eukaryotic	eukaryotic
2903.R1FSL1	3	1	1	1	1	7	3018815	404809	0.646813	0.634146	eukaryotic	eukaryotic
2903.R1G284	3	1	1	1	1	7	3018815	404809	0.646813	0.634146	eukaryotic	eukaryotic
29159.K1QI91	3	1	1	1	1	7	1012107	286863	0.318631	0.323645	eukaryotic	eukaryotic
29159.K1QN08	3	1	1	1	1	7	946232	286863	0.323327	0.323645	eukaryotic	eukaryotic
29159.K1QQL6	3	1	1	1	1	7	207939	286863	0.329385	0.323645	eukaryotic	eukaryotic
296587.C1DY95	3	1	1	1	1	7	1914326	1394111	0.655163	0.655163	eukaryotic	eukaryotic
296587.C1DYE0	3	1	1	1	1	7	1914326	1394111	0.655163	0.655163	eukaryotic	eukaryotic
296587.C1DYM1	3	1	1	1	1	7	1914326	1394111	0.655163	0.655163	eukaryotic	eukaryotic
296587.C1E159	3	1	1	1	1	7	1759952	1394111	0.652696	0.655163	eukaryotic	eukaryotic
296587.C1E3L9	3	1	1	1	1	7	1584432	1394111	0.649258	0.655163	eukaryotic	eukaryotic
296587.C1E4N6	3	1	1	1	1	7	1584432	1394111	0.649258	0.655163	eukaryotic	eukaryotic
296587.C1E5W1	3	1	1	1	1	7	1518632	1394111	0.653053	0.655163	eukaryotic	eukaryotic
296587.C1E7F4	3	1	1	1	1	7	1518632	1394111	0.653053	0.655163	eukaryotic	eukaryotic
296587.C1EAC1	3	1	1	1	1	7	1394111	1394111	0.655504	0.655163	eukaryotic	eukaryotic
296587.C1EBV1	3	1	1	1	1	7	1260463	1394111	0.656334	0.655163	eukaryotic	eukaryotic
296587.C1EC00	3	1	1	1	1	7	1260463	1394111	0.656334	0.655163	eukaryotic	eukaryotic
296587.C1ED74	3	1	1	1	1	7	1260463	1394111	0.656334	0.655163	eukaryotic	eukaryotic
296587.C1ED82	3	1	1	1	1	7	1260463	1394111	0.656334	0.655163	eukaryotic	eukaryotic
296587.C1EFG5	3	1	1	1	1	7	1011178	1394111	0.657706	0.655163	eukaryotic	eukaryotic
296587.C1EGN1	3	1	1	1	1	7	832469	1394111	0.661906	0.655163	eukaryotic	eukaryotic
296587.C1EHE2	3	1	1	1	1	7	832469	1394111	0.661906	0.655163	eukaryotic	eukaryotic
296587.C1FIZ1	3	1	1	1	1	7	1084120	1394111	0.658767	0.655163	eukaryotic	eukaryotic
29760.D7T9J5	3	1	1	1	1	7	23037640	22385790	0.337717	0.340282	eukaryotic	eukaryotic
29760.D7TDM6	3	1	1	1	1	7	24396256	22385790	0.335997	0.340282	eukaryotic	eukaryotic
29760.D7TZR0	3	1	1	1	1	7	23006713	22385790	0.328755	0.340282	eukaryotic	eukaryotic
29760.D7U5I9	3	1	1	1	1	7	19341863	22385790	0.337973	0.340282	eukaryotic	eukaryotic
29760.D7U8I2	3	1	1	1	1	7	22385790	22385790	0.340878	0.340282	eukaryotic	eukaryotic
29760.E0CR43	3	1	1	1	1	7	29360088	22385790	0.339229	0.340282	eukaryotic	eukaryotic
29760.F6H1J8	3	1	1	1	1	7	29360088	22385790	0.339229	0.340282	eukaryotic	eukaryotic
29760.F6H2K4	3	1	1	1	1	7	24021854	22385790	0.332144	0.340282	eukaryotic	eukaryotic
29760.F6H5P5	3	1	1	1	1	7	30274278	22385790	0.338306	0.340282	eukaryotic	eukaryotic
29760.F6H5P8	3	1	1	1	1	7	30274278	22385790	0.338306	0.340282	eukaryotic	eukaryotic
29760.F6H5P9	3	1	1	1	1	7	30274278	22385790	0.338306	0.340282	eukaryotic	eukaryotic
29760.F6HAZ6	3	1	1	1	1	7	25021644	22385790	0.340834	0.340282	eukaryotic	eukaryotic
29760.F6HK37	3	1	1	1	1	7	22702308	22385790	0.340167	0.340282	eukaryotic	eukaryotic
29760.F6HKF5	3	1	1	1	1	7	22385790	22385790	0.340878	0.340282	eukaryotic	eukaryotic
29760.F6HXJ2	3	1	1	1	1	7	23006713	22385790	0.328755	0.340282	eukaryotic	eukaryotic
29760.F6HXL6	3	1	1	1	1	7	23006713	22385790	0.328755	0.340282	eukaryotic	eukaryotic
29760.F6HZI0	3	1	1	1	1	7	21026614	22385790	0.336098	0.340282	eukaryotic	eukaryotic
29760.F6I1E3	3	1	1	1	1	7	20304915	22385790	0.336302	0.340282	eukaryotic	eukaryotic
299123.A0A218U8T0	3	1	1	1	1	7	113230791	71975343	0.390545	0.452774	eukaryotic	eukaryotic
299123.A0A218UAJ4	3	1	1	1	1	7	72268310	71975343	0.392837	0.452774	eukaryotic	eukaryotic
299123.A0A218UH57	3	1	1	1	1	7	152210353	71975343	0.385953	0.452774	eukaryotic	eukaryotic
299123.A0A218V2D2	3	1	1	1	1	7	114882318	71975343	0.388132	0.452774	eukaryotic	eukaryotic
299123.A0A218V3I1	3	1	1	1	1	7	62001666	71975343	0.404158	0.452774	eukaryotic	eukaryotic
299123.A0A218V5N0	3	1	1	1	1	7	113230791	71975343	0.390545	0.452774	eukaryotic	eukaryotic
299123.A0A218VBC0	3	1	1	1	1	7	38543003	71975343	0.405052	0.452774	eukaryotic	eukaryotic
3055.A0A2K3DFK8	3	1	1	1	1	7	7956128	7783581	0.616725	0.616725	eukaryotic	eukaryotic
3055.A0A2K3DXL6	3	1	1	1	1	7	9219487	7783581	0.623964	0.616725	eukaryotic	eukaryotic
3055.A0A2K3E803	3	1	1	1	1	7	8033586	7783581	0.611792	0.616725	eukaryotic	eukaryotic
3055.A8J1W1	3	1	1	1	1	7	9023764	7783581	0.623957	0.616725	eukaryotic	eukaryotic
3055.A8J3U8	3	1	1	1	1	7	7783581	7783581	0.62855	0.616725	eukaryotic	eukaryotic
3068.D8TI36	3	1	1	1	1	7	5981845	1491502	0.540056	0.385974	eukaryotic	eukaryotic
3068.D8TIN1	3	1	1	1	1	7	5981845	1491502	0.540056	0.385974	eukaryotic	eukaryotic
3068.D8U5K5	3	1	1	1	1	7	1267046	1491502	0.545369	0.385974	eukaryotic	eukaryotic
3075.A0A087SAQ8	3	1	1	1	1	7	240458	285544	0.61946	0.604582	eukaryotic	eukaryotic
3075.A0A087SB47	3	1	1	1	1	7	230410	285544	0.608446	0.604582	eukaryotic	eukaryotic
3075.A0A087SC15	3	1	1	1	1	7	597312	285544	0.614803	0.604582	eukaryotic	eukaryotic
3075.A0A087SEQ7	3	1	1	1	1	7	544132	285544	0.611504	0.604582	eukaryotic	eukaryotic
3075.A0A087SN79	3	1	1	1	1	7	658714	285544	0.615505	0.604582	eukaryotic	eukaryotic
3075.A0A087SQ71	3	1	1	1	1	7	202718	285544	0.606754	0.604582	eukaryotic	eukaryotic
3075.A0A087STF5	3	1	1	1	1	7	347927	285544	0.607254	0.604582	eukaryotic	eukaryotic
3075.A0A087STG1	3	1	1	1	1	7	347927	285544	0.607254	0.604582	eukaryotic	eukaryotic
3076.A0A2P6TBP2	3	1	1	1	1	7	4172217	4091731	0.646272	0.637722	eukaryotic	eukaryotic
3076.A0A2P6TDD5	3	1	1	1	1	7	4323391	4091731	0.631252	0.637722	eukaryotic	eukaryotic
3076.A0A2P6TDH8	3	1	1	1	1	7	4323391	4091731	0.631252	0.637722	eukaryotic	eukaryotic
3076.A0A2P6TFV7	3	1	1	1	1	7	3448385	4091731	0.639808	0.637722	eukaryotic	eukaryotic
3076.A0A2P6TSF6	3	1	1	1	1	7	4353048	4091731	0.64575	0.637722	eukaryotic	eukaryotic
307972.A0A2G8KJ22	3	1	1	1	1	7	412618	487242	0.372032	0.368322	eukaryotic	eukaryotic
309737.Cok_S_s011_4185	3	1	1	1	1	7	1284827	505946	0.538283	0.533501	eukaryotic	eukaryotic
309737.Cok_S_s081_9723	3	1	1	1	1	7	483675	505946	0.529335	0.533501	eukaryotic	eukaryotic
309737.Cok_S_s093_10328	3	1	1	1	1	7	434681	505946	0.527856	0.533501	eukaryotic	eukaryotic
309737.Cok_S_s104_10809	3	1	1	1	1	7	409097	505946	0.526748	0.533501	eukaryotic	eukaryotic
31033.H2RJE4	3	1	1	1	1	7	16705554	16705554	0.454552	0.455864	eukaryotic	eukaryotic
31033.H2RRL9	3	1	1	1	1	7	17484281	16705554	0.450754	0.455864	eukaryotic	eukaryotic
31033.H2RSR9	3	1	1	1	1	7	17484281	16705554	0.450754	0.455864	eukaryotic	eukaryotic
31033.H2RYS6	3	1	1	1	1	7	16056981	16705554	0.454807	0.455864	eukaryotic	eukaryotic
31033.H2RZ84	3	1	1	1	1	7	16363588	16705554	0.44744	0.455864	eukaryotic	eukaryotic
31033.H2RZX8	3	1	1	1	1	7	17484281	16705554	0.450754	0.455864	eukaryotic	eukaryotic
31033.H2S101	3	1	1	1	1	7	17484281	16705554	0.450754	0.455864	eukaryotic	eukaryotic
31033.H2S1R4	3	1	1	1	1	7	17484281	16705554	0.450754	0.455864	eukaryotic	eukaryotic
31033.H2S6U1	3	1	1	1	1	7	15473625	16705554	0.450512	0.455864	eukaryotic	eukaryotic
31033.H2SGX0	3	1	1	1	1	7	16056981	16705554	0.454807	0.455864	eukaryotic	eukaryotic
31033.H2SI13	3	1	1	1	1	7	16367602	16705554	0.45576	0.455864	eukaryotic	eukaryotic
31033.H2STZ1	3	1	1	1	1	7	18239319	16705554	0.450596	0.455864	eukaryotic	eukaryotic
31033.H2SWC0	3	1	1	1	1	7	14586309	16705554	0.45439	0.455864	eukaryotic	eukaryotic
31033.H2SYJ1	3	1	1	1	1	7	14586309	16705554	0.45439	0.455864	eukaryotic	eukaryotic
31033.H2T8I8	3	1	1	1	1	7	16705554	16705554	0.454552	0.455864	eukaryotic	eukaryotic
31033.H2T9E1	3	1	1	1	1	7	17484281	16705554	0.450754	0.455864	eukaryotic	eukaryotic
31033.H2TAY4	3	1	1	1	1	7	14586309	16705554	0.45439	0.455864	eukaryotic	eukaryotic
31033.H2TEV7	3	1	1	1	1	7	16036329	16705554	0.447184	0.455864	eukaryotic	eukaryotic
31033.H2TJS8	3	1	1	1	1	7	17484281	16705554	0.450754	0.455864	eukaryotic	eukaryotic
31033.H2TNI2	3	1	1	1	1	7	12913241	16705554	0.456595	0.455864	eukaryotic	eukaryotic
31033.H2TXG0	3	1	1	1	1	7	14586309	16705554	0.45439	0.455864	eukaryotic	eukaryotic
31033.H2U1X3	3	1	1	1	1	7	13527505	16705554	0.45906	0.455864	eukaryotic	eukaryotic
31033.H2U2V2	3	1	1	1	1	7	19418398	16705554	0.444211	0.455864	eukaryotic	eukaryotic
31033.H2UN41	3	1	1	1	1	7	10237709	16705554	0.473993	0.455864	eukaryotic	eukaryotic
31033.H2US31	3	1	1	1	1	7	16842302	16705554	0.456082	0.455864	eukaryotic	eukaryotic
31033.H2UXG4	3	1	1	1	1	7	17484281	16705554	0.450754	0.455864	eukaryotic	eukaryotic
31033.H2UXR7	3	1	1	1	1	7	20050448	16705554	0.434438	0.455864	eukaryotic	eukaryotic
31033.H2V2B9	3	1	1	1	1	7	16705554	16705554	0.454552	0.455864	eukaryotic	eukaryotic
31033.H2V2K6	3	1	1	1	1	7	21507416	16705554	0.447165	0.455864	eukaryotic	eukaryotic
31033.H2V3V7	3	1	1	1	1	7	21507416	16705554	0.447165	0.455864	eukaryotic	eukaryotic
31033.H2V9T7	3	1	1	1	1	7	21507416	16705554	0.447165	0.455864	eukaryotic	eukaryotic
312017.I7M435	3	1	1	1	1	7	531141	520944	0.226979	0.211948	eukaryotic	eukaryotic
312017.I7M7K1	3	1	1	1	1	7	595842	520944	0.218598	0.211948	eukaryotic	eukaryotic
312017.I7MHL5	3	1	1	1	1	7	466183	520944	0.224779	0.211948	eukaryotic	eukaryotic
312017.Q23AG3	3	1	1	1	1	7	583022	520944	0.223702	0.211948	eukaryotic	eukaryotic
312017.Q240U0	3	1	1	1	1	7	453052	520944	0.225277	0.211948	eukaryotic	eukaryotic
3218.A0A2K1IK37	3	1	1	1	1	7	15138417	17435540	0.331626	0.344539	eukaryotic	eukaryotic
3218.A0A2K1IMN8	3	1	1	1	1	7	15354561	17435540	0.331824	0.344539	eukaryotic	eukaryotic
3218.A0A2K1KU92	3	1	1	1	1	7	25551833	17435540	0.334786	0.344539	eukaryotic	eukaryotic
3218.A0A2K1KWS9	3	1	1	1	1	7	25551833	17435540	0.334786	0.344539	eukaryotic	eukaryotic
3218.A0A2K1LAK1	3	1	1	1	1	7	30242099	17435540	0.33351	0.344539	eukaryotic	eukaryotic
3218.A9RMQ9	3	1	1	1	1	7	15735162	17435540	0.333738	0.344539	eukaryotic	eukaryotic
3218.A9SKH1	3	1	1	1	1	7	11183740	17435540	0.328819	0.344539	eukaryotic	eukaryotic
33097.A0A150GTZ7	3	1	1	1	1	7	3622473	1267137	0.498421	0.597839	eukaryotic	eukaryotic
33097.A0A150H0N0	3	1	1	1	1	7	4638508	1267137	0.571439	0.597839	eukaryotic	eukaryotic
33097.A0A150H4E9	3	1	1	1	1	7	6378021	1267137	0.546958	0.597839	eukaryotic	eukaryotic
33097.A0A150H4R9	3	1	1	1	1	7	6378021	1267137	0.546958	0.597839	eukaryotic	eukaryotic
34765.E4WQB5	3	1	1	1	1	7	3167016	395388	0.396366	0.373585	eukaryotic	eukaryotic
34765.E4WV66	3	1	1	1	1	7	2515154	395388	0.392312	0.373585	eukaryotic	eukaryotic
34765.E4WVE3	3	1	1	1	1	7	2515154	395388	0.392312	0.373585	eukaryotic	eukaryotic
34765.E4WVJ8	3	1	1	1	1	7	2515154	395388	0.392312	0.373585	eukaryotic	eukaryotic
34765.E4WW83	3	1	1	1	1	7	2515154	395388	0.392312	0.373585	eukaryotic	eukaryotic
34765.E4WXX0	3	1	1	1	1	7	2289854	395388	0.392825	0.373585	eukaryotic	eukaryotic
34765.E4WYL5	3	1	1	1	1	7	1792779	395388	0.38961	0.373585	eukaryotic	eukaryotic
34765.E4X0I0	3	1	1	1	1	7	1516149	395388	0.402662	0.373585	eukaryotic	eukaryotic
34765.E4X426	3	1	1	1	1	7	1154402	395388	0.399262	0.373585	eukaryotic	eukaryotic
34765.E4X722	3	1	1	1	1	7	1019698	395388	0.403069	0.373585	eukaryotic	eukaryotic
34765.E4X809	3	1	1	1	1	7	941620	395388	0.389507	0.373585	eukaryotic	eukaryotic
34765.E4XGJ7	3	1	1	1	1	7	403864	395388	0.371239	0.373585	eukaryotic	eukaryotic
34765.E4XHV6	3	1	1	1	1	7	350212	395388	0.381235	0.373585	eukaryotic	eukaryotic
34765.E4XKC2	3	1	1	1	1	7	292974	395388	0.365783	0.373585	eukaryotic	eukaryotic
35128.B5YN42	3	1	1	1	1	7	1992435	1992435	0.469974	0.467687	eukaryotic	eukaryotic
35128.B8BRT9	3	1	1	1	1	7	3042586	1992435	0.467153	0.467687	eukaryotic	eukaryotic
35128.B8BS17	3	1	1	1	1	7	3042586	1992435	0.467153	0.467687	eukaryotic	eukaryotic
35128.B8BT46	3	1	1	1	1	7	3042586	1992435	0.467153	0.467687	eukaryotic	eukaryotic
35128.B8BZ18	3	1	1	1	1	7	2402324	1992435	0.47024	0.467687	eukaryotic	eukaryotic
35128.B8C300	3	1	1	1	1	7	2305973	1992435	0.468613	0.467687	eukaryotic	eukaryotic
35128.B8C3A1	3	1	1	1	1	7	2305973	1992435	0.468613	0.467687	eukaryotic	eukaryotic
35128.B8C663	3	1	1	1	1	7	2071481	1992435	0.469227	0.467687	eukaryotic	eukaryotic
35128.B8C6I3	3	1	1	1	1	7	1267199	1992435	0.467702	0.467687	eukaryotic	eukaryotic
35128.B8C9M7	3	1	1	1	1	7	1105669	1992435	0.470392	0.467687	eukaryotic	eukaryotic
35128.B8C9X7	3	1	1	1	1	7	1128383	1992435	0.459692	0.467687	eukaryotic	eukaryotic
35128.B8CFU3	3	1	1	1	1	7	1057566	1992435	0.45559	0.467687	eukaryotic	eukaryotic
353152.A3FQ78	3	1	1	1	1	7	985970	1104418	0.303653	0.301741	eukaryotic	eukaryotic
353152.Q5CQ80	3	1	1	1	1	7	1080901	1104418	0.287323	0.301741	eukaryotic	eukaryotic
353152.Q5CS14	3	1	1	1	1	7	1080901	1104418	0.287323	0.301741	eukaryotic	eukaryotic
353152.Q5CSF5	3	1	1	1	1	7	875660	1104418	0.302381	0.301741	eukaryotic	eukaryotic
353152.Q5CSZ5	3	1	1	1	1	7	875660	1104418	0.302381	0.301741	eukaryotic	eukaryotic
353152.Q5CTL9	3	1	1	1	1	7	985970	1104418	0.303653	0.301741	eukaryotic	eukaryotic
353152.Q5CUE4	3	1	1	1	1	7	1099353	1104418	0.306494	0.301741	eukaryotic	eukaryotic
353152.Q5CUJ2	3	1	1	1	1	7	1099353	1104418	0.306494	0.301741	eukaryotic	eukaryotic
353152.Q5CV46	3	1	1	1	1	7	1099353	1104418	0.306494	0.301741	eukaryotic	eukaryotic
353152.Q5CVP1	3	1	1	1	1	7	1344713	1104418	0.300513	0.301741	eukaryotic	eukaryotic
353152.Q5CVS5	3	1	1	1	1	7	1344713	1104418	0.300513	0.301741	eukaryotic	eukaryotic
353152.Q5CWB8	3	1	1	1	1	7	1344713	1104418	0.300513	0.301741	eukaryotic	eukaryotic
353153.Q4CL52	3	1	1	1	1	7	67310	88625	0.473199	0.517815	eukaryotic	eukaryotic
353153.Q4CTE5	3	1	1	1	1	7	70492	88625	0.517775	0.517815	eukaryotic	eukaryotic
353153.Q4CTR0	3	1	1	1	1	7	215138	88625	0.48765	0.517815	eukaryotic	eukaryotic
353153.Q4CWB4	3	1	1	1	1	7	123271	88625	0.538886	0.517815	eukaryotic	eukaryotic
353153.Q4CXJ7	3	1	1	1	1	7	99012	88625	0.503383	0.517815	eukaryotic	eukaryotic
353153.Q4CYB9	3	1	1	1	1	7	213134	88625	0.514357	0.517815	eukaryotic	eukaryotic
353153.Q4CYZ2	3	1	1	1	1	7	123156	88625	0.514112	0.517815	eukaryotic	eukaryotic
353153.Q4D0Z5	3	1	1	1	1	7	578483	88625	0.531122	0.517815	eukaryotic	eukaryotic
353153.Q4D2V5	3	1	1	1	1	7	854814	88625	0.476552	0.517815	eukaryotic	eukaryotic
353153.Q4D449	3	1	1	1	1	7	137574	88625	0.51445	0.517815	eukaryotic	eukaryotic
353153.Q4D5R2	3	1	1	1	1	7	221438	88625	0.480428	0.517815	eukaryotic	eukaryotic
353153.Q4D6X2	3	1	1	1	1	7	432269	88625	0.486514	0.517815	eukaryotic	eukaryotic
353153.Q4DB46	3	1	1	1	1	7	708952	88625	0.486497	0.517815	eukaryotic	eukaryotic
353153.Q4DDL2	3	1	1	1	1	7	990721	88625	0.474774	0.517815	eukaryotic	eukaryotic
353153.Q4DJA9	3	1	1	1	1	7	73980	88625	0.519248	0.517815	eukaryotic	eukaryotic
353153.Q4DMJ6	3	1	1	1	1	7	267673	88625	0.475513	0.517815	eukaryotic	eukaryotic
353153.Q4DN47	3	1	1	1	1	7	111346	88625	0.491423	0.517815	eukaryotic	eukaryotic
353153.Q4DND3	3	1	1	1	1	7	51032	88625	0.514442	0.517815	eukaryotic	eukaryotic
353153.Q4DNQ1	3	1	1	1	1	7	578483	88625	0.531122	0.517815	eukaryotic	eukaryotic
353153.Q4DQ62	3	1	1	1	1	7	94216	88625	0.540333	0.517815	eukaryotic	eukaryotic
353153.Q4DRD4	3	1	1	1	1	7	119322	88625	0.483767	0.517815	eukaryotic	eukaryotic
353153.Q4DRV3	3	1	1	1	1	7	99610	88625	0.504106	0.517815	eukaryotic	eukaryotic
353153.Q4DUZ8	3	1	1	1	1	7	266239	88625	0.480715	0.517815	eukaryotic	eukaryotic
353153.Q4DVT8	3	1	1	1	1	7	509309	88625	0.472093	0.517815	eukaryotic	eukaryotic
353153.Q4DX78	3	1	1	1	1	7	509309	88625	0.472093	0.517815	eukaryotic	eukaryotic
353153.Q4DY29	3	1	1	1	1	7	462297	88625	0.46986	0.517815	eukaryotic	eukaryotic
353153.Q4E0H4	3	1	1	1	1	7	158613	88625	0.506163	0.517815	eukaryotic	eukaryotic
353153.Q4E128	3	1	1	1	1	7	204475	88625	0.478533	0.517815	eukaryotic	eukaryotic
353153.Q4E1M2	3	1	1	1	1	7	504134	88625	0.501904	0.517815	eukaryotic	eukaryotic
353153.Q4E1S0	3	1	1	1	1	7	198482	88625	0.476376	0.517815	eukaryotic	eukaryotic
36022.A0A061AUH7	3	1	1	1	1	7	1873954	1964509	0.445547	0.441297	eukaryotic	eukaryotic
36022.A0A061AW61	3	1	1	1	1	7	3147267	1964509	0.447005	0.441297	eukaryotic	eukaryotic
36022.A0A061B035	3	1	1	1	1	7	3147267	1964509	0.447005	0.441297	eukaryotic	eukaryotic
36022.A0A061B2J5	3	1	1	1	1	7	3147267	1964509	0.447005	0.441297	eukaryotic	eukaryotic
36022.A0A061BBE2	3	1	1	1	1	7	1873954	1964509	0.445547	0.441297	eukaryotic	eukaryotic
36022.A0A061BD79	3	1	1	1	1	7	2138411	1964509	0.446193	0.441297	eukaryotic	eukaryotic
36022.A0A1V2KYH2	3	1	1	1	1	7	2138411	1964509	0.446193	0.441297	eukaryotic	eukaryotic
36022.A0A1V2L129	3	1	1	1	1	7	1133956	1964509	0.435337	0.441297	eukaryotic	eukaryotic
36022.A0A1V2L1J4	3	1	1	1	1	7	1133956	1964509	0.435337	0.441297	eukaryotic	eukaryotic
36022.A0A1V2L267	3	1	1	1	1	7	1593030	1964509	0.439346	0.441297	eukaryotic	eukaryotic
36022.A0A1V2L4B1	3	1	1	1	1	7	1593030	1964509	0.439346	0.441297	eukaryotic	eukaryotic
36022.A0A1V2L4C2	3	1	1	1	1	7	1593030	1964509	0.439346	0.441297	eukaryotic	eukaryotic
36022.A0A1V2L5P3	3	1	1	1	1	7	3147267	1964509	0.447005	0.441297	eukaryotic	eukaryotic
36022.A0A1V2L710	3	1	1	1	1	7	1964509	1964509	0.443247	0.441297	eukaryotic	eukaryotic
36022.A0A1V2L737	3	1	1	1	1	7	1964509	1964509	0.443247	0.441297	eukaryotic	eukaryotic
36022.A0A1V2L7A5	3	1	1	1	1	7	1964509	1964509	0.443247	0.441297	eukaryotic	eukaryotic
36022.A0A1V2L7D1	3	1	1	1	1	7	1964509	1964509	0.443247	0.441297	eukaryotic	eukaryotic
36022.A0A1V2L8L3	3	1	1	1	1	7	3147267	1964509	0.447005	0.441297	eukaryotic	eukaryotic
36022.A0A1V2L923	3	1	1	1	1	7	3147267	1964509	0.447005	0.441297	eukaryotic	eukaryotic
36022.A0A1V2L9H9	3	1	1	1	1	7	1964509	1964509	0.443247	0.441297	eukaryotic	eukaryotic
36022.A0A1V2LC56	3	1	1	1	1	7	2138411	1964509	0.446193	0.441297	eukaryotic	eukaryotic
36022.A0A1V2LDD4	3	1	1	1	1	7	2138411	1964509	0.446193	0.441297	eukaryotic	eukaryotic
361077.A0A151Z6J1	3	1	1	1	1	7	878591	1098391	0.298806	0.294537	eukaryotic	eukaryotic
361077.A0A151Z721	3	1	1	1	1	7	878591	1098391	0.298806	0.294537	eukaryotic	eukaryotic
361077.A0A151Z9G8	3	1	1	1	1	7	2033624	1098391	0.297016	0.294537	eukaryotic	eukaryotic
361077.A0A151ZAY5	3	1	1	1	1	7	1536113	1098391	0.301352	0.294537	eukaryotic	eukaryotic
361077.A0A151ZBI6	3	1	1	1	1	7	1536113	1098391	0.301352	0.294537	eukaryotic	eukaryotic
361077.A0A151ZHG0	3	1	1	1	1	7	1864557	1098391	0.297148	0.294537	eukaryotic	eukaryotic
361077.A0A151ZHP0	3	1	1	1	1	7	1864557	1098391	0.297148	0.294537	eukaryotic	eukaryotic
361077.A0A151ZSB2	3	1	1	1	1	7	774047	1098391	0.297121	0.294537	eukaryotic	eukaryotic
361077.A0A152A0P7	3	1	1	1	1	7	705217	1098391	0.298423	0.294537	eukaryotic	eukaryotic
361077.A0A152A2Y3	3	1	1	1	1	7	1224150	1098391	0.301623	0.294537	eukaryotic	eukaryotic
361077.A0A152A3M8	3	1	1	1	1	7	1224150	1098391	0.301623	0.294537	eukaryotic	eukaryotic
361077.A0A152A3Y7	3	1	1	1	1	7	1224150	1098391	0.301623	0.294537	eukaryotic	eukaryotic
361077.A0A152A541	3	1	1	1	1	7	701018	1098391	0.291032	0.294537	eukaryotic	eukaryotic
361077.A0A152A5U0	3	1	1	1	1	7	1030051	1098391	0.296222	0.294537	eukaryotic	eukaryotic
361077.A0A152A6F4	3	1	1	1	1	7	1030051	1098391	0.296222	0.294537	eukaryotic	eukaryotic
361077.A0A152A6Z8	3	1	1	1	1	7	1465624	1098391	0.302027	0.294537	eukaryotic	eukaryotic
361077.A0A152A910	3	1	1	1	1	7	1401371	1098391	0.300333	0.294537	eukaryotic	eukaryotic
36329.O77367	3	1	1	1	1	7	1067972	1687657	0.200642	0.196066	eukaryotic	eukaryotic
36329.O77375	3	1	1	1	1	7	1067972	1687657	0.200642	0.196066	eukaryotic	eukaryotic
36329.O96154	3	1	1	1	1	7	947103	1687657	0.197491	0.196066	eukaryotic	eukaryotic
36329.Q7KWI9	3	1	1	1	1	7	947103	1687657	0.197491	0.196066	eukaryotic	eukaryotic
36329.Q8I1R6	3	1	1	1	1	7	1200491	1687657	0.205149	0.196066	eukaryotic	eukaryotic
36329.Q8I512	3	1	1	1	1	7	2271495	1687657	0.193032	0.196066	eukaryotic	eukaryotic
36329.Q8ILB8	3	1	1	1	1	7	3291937	1687657	0.184364	0.196066	eukaryotic	eukaryotic
36329.Q8ILP6	3	1	1	1	1	7	3291937	1687657	0.184364	0.196066	eukaryotic	eukaryotic
367110.A7UWD6	3	1	1	1	1	7	6436247	6000762	0.488346	0.28787	eukaryotic	eukaryotic
367110.P10857	3	1	1	1	1	7	4478684	6000762	0.481812	0.28787	eukaryotic	eukaryotic
367110.Q1K4T9	3	1	1	1	1	7	4478684	6000762	0.481812	0.28787	eukaryotic	eukaryotic
367110.Q1K5F7	3	1	1	1	1	7	4478684	6000762	0.481812	0.28787	eukaryotic	eukaryotic
367110.Q1K8P6	3	1	1	1	1	7	4478684	6000762	0.481812	0.28787	eukaryotic	eukaryotic
367110.Q7RXM3	3	1	1	1	1	7	5274803	6000762	0.487609	0.28787	eukaryotic	eukaryotic
367110.Q7S1Q2	3	1	1	1	1	7	5274803	6000762	0.487609	0.28787	eukaryotic	eukaryotic
367110.Q7S239	3	1	1	1	1	7	9798894	6000762	0.487116	0.28787	eukaryotic	eukaryotic
367110.Q7S2B6	3	1	1	1	1	7	6436247	6000762	0.488346	0.28787	eukaryotic	eukaryotic
367110.Q7S4D7	3	1	1	1	1	7	4255304	6000762	0.476909	0.28787	eukaryotic	eukaryotic
367110.Q7S830	3	1	1	1	1	7	6000762	6000762	0.484669	0.28787	eukaryotic	eukaryotic
367110.Q7SCW9	3	1	1	1	1	7	9798894	6000762	0.487116	0.28787	eukaryotic	eukaryotic
367110.Q7SF16	3	1	1	1	1	7	9798894	6000762	0.487116	0.28787	eukaryotic	eukaryotic
367110.Q7SF69	3	1	1	1	1	7	9798894	6000762	0.487116	0.28787	eukaryotic	eukaryotic
367110.Q7SH42	3	1	1	1	1	7	9798894	6000762	0.487116	0.28787	eukaryotic	eukaryotic
3694.A0A2K1X1B7	3	1	1	1	1	7	16080359	19465462	0.328893	0.318157	eukaryotic	eukaryotic
3694.A0A2K1X7G0	3	1	1	1	1	7	24267052	19465462	0.327342	0.318157	eukaryotic	eukaryotic
3694.A0A2K1X983	3	1	1	1	1	7	14494362	19465462	0.330792	0.318157	eukaryotic	eukaryotic
3694.A0A2K1XFG1	3	1	1	1	1	7	14494362	19465462	0.330792	0.318157	eukaryotic	eukaryotic
3694.A0A2K1XL71	3	1	1	1	1	7	15278578	19465462	0.331821	0.318157	eukaryotic	eukaryotic
3694.A0A2K1XLV6	3	1	1	1	1	7	15278578	19465462	0.331821	0.318157	eukaryotic	eukaryotic
3694.A0A2K1XZR5	3	1	1	1	1	7	16320718	19465462	0.324463	0.318157	eukaryotic	eukaryotic
3694.A0A2K1ZXQ8	3	1	1	1	1	7	27912126	19465462	0.326743	0.318157	eukaryotic	eukaryotic
3694.A0A2K2A0R3	3	1	1	1	1	7	27912126	19465462	0.326743	0.318157	eukaryotic	eukaryotic
3694.A0A2K2AL37	3	1	1	1	1	7	25890705	19465462	0.331888	0.318157	eukaryotic	eukaryotic
3694.A0A2K2ARQ7	3	1	1	1	1	7	24267052	19465462	0.327342	0.318157	eukaryotic	eukaryotic
3694.A0A2K2AYS8	3	1	1	1	1	7	24267052	19465462	0.327342	0.318157	eukaryotic	eukaryotic
3694.A0A2K2AZI7	3	1	1	1	1	7	21816809	19465462	0.329905	0.318157	eukaryotic	eukaryotic
3694.A0A2K2B3T9	3	1	1	1	1	7	21816809	19465462	0.329905	0.318157	eukaryotic	eukaryotic
3694.A0A2K2C3V9	3	1	1	1	1	7	50495392	19465462	0.329527	0.318157	eukaryotic	eukaryotic
3694.B9GP45	3	1	1	1	1	7	21816809	19465462	0.329905	0.318157	eukaryotic	eukaryotic
3694.B9GWE8	3	1	1	1	1	7	21816809	19465462	0.329905	0.318157	eukaryotic	eukaryotic
3694.B9GY21	3	1	1	1	1	7	21816809	19465462	0.329905	0.318157	eukaryotic	eukaryotic
3694.B9GZ90	3	1	1	1	1	7	21816809	19465462	0.329905	0.318157	eukaryotic	eukaryotic
3694.B9H4T8	3	1	1	1	1	7	21816809	19465462	0.329905	0.318157	eukaryotic	eukaryotic
3694.B9H7H0	3	1	1	1	1	7	25890705	19465462	0.331888	0.318157	eukaryotic	eukaryotic
3694.B9H7Q8	3	1	1	1	1	7	25890705	19465462	0.331888	0.318157	eukaryotic	eukaryotic
3694.B9HF25	3	1	1	1	1	7	15610914	19465462	0.327494	0.318157	eukaryotic	eukaryotic
3694.B9HGA8	3	1	1	1	1	7	15610914	19465462	0.327494	0.318157	eukaryotic	eukaryotic
3694.B9HI65	3	1	1	1	1	7	19465462	19465462	0.342484	0.318157	eukaryotic	eukaryotic
3694.B9IB37	3	1	1	1	1	7	18920895	19465462	0.334564	0.318157	eukaryotic	eukaryotic
3694.B9ILE1	3	1	1	1	1	7	16958301	19465462	0.321915	0.318157	eukaryotic	eukaryotic
3694.B9MW00	3	1	1	1	1	7	18920895	19465462	0.334564	0.318157	eukaryotic	eukaryotic
3694.B9NAS8	3	1	1	1	1	7	15610914	19465462	0.327494	0.318157	eukaryotic	eukaryotic
3694.U5GEY7	3	1	1	1	1	7	25890705	19465462	0.331888	0.318157	eukaryotic	eukaryotic
3702.B3H4K2	3	1	1	1	1	7	18585057	23459831	0.361981	0.361981	eukaryotic	eukaryotic
3702.F4I116	3	1	1	1	1	7	30427672	23459831	0.356798	0.361981	eukaryotic	eukaryotic
3702.F4J982	3	1	1	1	1	7	23459831	23459831	0.363218	0.361981	eukaryotic	eukaryotic
3702.F4JEB4	3	1	1	1	1	7	23459831	23459831	0.363218	0.361981	eukaryotic	eukaryotic
3702.F4JN22	3	1	1	1	1	7	18585057	23459831	0.361981	0.361981	eukaryotic	eukaryotic
3702.F4KHB6	3	1	1	1	1	7	26975503	23459831	0.359252	0.361981	eukaryotic	eukaryotic
3702.O65688	3	1	1	1	1	7	18585057	23459831	0.361981	0.361981	eukaryotic	eukaryotic
3702.O80501	3	1	1	1	1	7	19698290	23459831	0.358597	0.361981	eukaryotic	eukaryotic
3702.O80585	3	1	1	1	1	7	19698290	23459831	0.358597	0.361981	eukaryotic	eukaryotic
3702.P52420	3	1	1	1	1	7	30427672	23459831	0.356798	0.361981	eukaryotic	eukaryotic
3702.Q1PEM2	3	1	1	1	1	7	23459831	23459831	0.363218	0.361981	eukaryotic	eukaryotic
3702.Q2V2U9	3	1	1	1	1	7	26975503	23459831	0.359252	0.361981	eukaryotic	eukaryotic
3702.Q3EC48	3	1	1	1	1	7	19698290	23459831	0.358597	0.361981	eukaryotic	eukaryotic
3702.Q5XF36	3	1	1	1	1	7	18585057	23459831	0.361981	0.361981	eukaryotic	eukaryotic
3702.Q67Z55	3	1	1	1	1	7	30427672	23459831	0.356798	0.361981	eukaryotic	eukaryotic
3702.Q71N54	3	1	1	1	1	7	18585057	23459831	0.361981	0.361981	eukaryotic	eukaryotic
3702.Q7Y217	3	1	1	1	1	7	30427672	23459831	0.356798	0.361981	eukaryotic	eukaryotic
3702.Q8VXX4	3	1	1	1	1	7	26975503	23459831	0.359252	0.361981	eukaryotic	eukaryotic
3702.Q93V61	3	1	1	1	1	7	23459831	23459831	0.363218	0.361981	eukaryotic	eukaryotic
3702.Q940X7	3	1	1	1	1	7	26975503	23459831	0.359252	0.361981	eukaryotic	eukaryotic
3702.Q94AE4	3	1	1	1	1	7	26975503	23459831	0.359252	0.361981	eukaryotic	eukaryotic
3702.Q94AQ6	3	1	1	1	1	7	26975503	23459831	0.359252	0.361981	eukaryotic	eukaryotic
3702.Q9C6C2	3	1	1	1	1	7	30427672	23459831	0.356798	0.361981	eukaryotic	eukaryotic
3702.Q9CAM7	3	1	1	1	1	7	30427672	23459831	0.356798	0.361981	eukaryotic	eukaryotic
3702.Q9CAQ8	3	1	1	1	1	7	30427672	23459831	0.356798	0.361981	eukaryotic	eukaryotic
3702.Q9FE52	3	1	1	1	1	7	26975503	23459831	0.359252	0.361981	eukaryotic	eukaryotic
3702.Q9FJ79	3	1	1	1	1	7	26975503	23459831	0.359252	0.361981	eukaryotic	eukaryotic
3702.Q9FL05	3	1	1	1	1	7	26975503	23459831	0.359252	0.361981	eukaryotic	eukaryotic
3702.Q9FYC5	3	1	1	1	1	7	23459831	23459831	0.363218	0.361981	eukaryotic	eukaryotic
3702.Q9LFT9	3	1	1	1	1	7	19698290	23459831	0.358597	0.361981	eukaryotic	eukaryotic
3702.Q9LSX2	3	1	1	1	1	7	26975503	23459831	0.359252	0.361981	eukaryotic	eukaryotic
3702.Q9LYG8	3	1	1	1	1	7	26975503	23459831	0.359252	0.361981	eukaryotic	eukaryotic
3702.Q9LYV5	3	1	1	1	1	7	26975503	23459831	0.359252	0.361981	eukaryotic	eukaryotic
3702.Q9M1T1	3	1	1	1	1	7	23459831	23459831	0.363218	0.361981	eukaryotic	eukaryotic
3702.Q9MA74	3	1	1	1	1	7	30427672	23459831	0.356798	0.361981	eukaryotic	eukaryotic
3702.Q9SFV7	3	1	1	1	1	7	23459831	23459831	0.363218	0.361981	eukaryotic	eukaryotic
3702.Q9SID8	3	1	1	1	1	7	19698290	23459831	0.358597	0.361981	eukaryotic	eukaryotic
3702.Q9SJB9	3	1	1	1	1	7	19698290	23459831	0.358597	0.361981	eukaryotic	eukaryotic
370355.A0A0A1TW25	3	1	1	1	1	7	774237	243236	0.322959	0.26275	eukaryotic	eukaryotic
370355.A0A0A1TY01	3	1	1	1	1	7	313109	243236	0.297459	0.26275	eukaryotic	eukaryotic
370355.A0A0A1TZJ3	3	1	1	1	1	7	326045	243236	0.344084	0.26275	eukaryotic	eukaryotic
370355.A0A0A1U1B8	3	1	1	1	1	7	164754	243236	0.338675	0.26275	eukaryotic	eukaryotic
370355.A0A0A1U2H5	3	1	1	1	1	7	939560	243236	0.341958	0.26275	eukaryotic	eukaryotic
370355.A0A0A1U4N3	3	1	1	1	1	7	487713	243236	0.315585	0.26275	eukaryotic	eukaryotic
370355.A0A0A1U683	3	1	1	1	1	7	939560	243236	0.341958	0.26275	eukaryotic	eukaryotic
370355.A0A0A1UA84	3	1	1	1	1	7	155173	243236	0.307573	0.26275	eukaryotic	eukaryotic
370355.A0A0A1UB36	3	1	1	1	1	7	186701	243236	0.294524	0.26275	eukaryotic	eukaryotic
370355.A0A0A1UBX1	3	1	1	1	1	7	536646	243236	0.332957	0.26275	eukaryotic	eukaryotic
3708.A0A078F649	3	1	1	1	1	7	46347055	45943548	0.343584	0.350463	eukaryotic	eukaryotic
3708.A0A078F6R8	3	1	1	1	1	7	49139118	45943548	0.342188	0.350463	eukaryotic	eukaryotic
3708.A0A078FLU7	3	1	1	1	1	7	23556787	45943548	0.319972	0.350463	eukaryotic	eukaryotic
3708.A0A078FTS9	3	1	1	1	1	7	45943548	45943548	0.330156	0.350463	eukaryotic	eukaryotic
3708.A0A078FVS0	3	1	1	1	1	7	31473443	45943548	0.336968	0.350463	eukaryotic	eukaryotic
3708.A0A078FWD4	3	1	1	1	1	7	31473443	45943548	0.336968	0.350463	eukaryotic	eukaryotic
3708.A0A078FXG5	3	1	1	1	1	7	70552673	45943548	0.339245	0.350463	eukaryotic	eukaryotic
3708.A0A078G3W5	3	1	1	1	1	7	35822560	45943548	0.337747	0.350463	eukaryotic	eukaryotic
3708.A0A078G7Z3	3	1	1	1	1	7	35332831	45943548	0.333872	0.350463	eukaryotic	eukaryotic
3708.A0A078G839	3	1	1	1	1	7	46347055	45943548	0.343584	0.350463	eukaryotic	eukaryotic
3708.A0A078GAF4	3	1	1	1	1	7	23556787	45943548	0.319972	0.350463	eukaryotic	eukaryotic
3708.A0A078GMQ2	3	1	1	1	1	7	27426921	45943548	0.337195	0.350463	eukaryotic	eukaryotic
3708.A0A078GU16	3	1	1	1	1	7	45505716	45943548	0.337592	0.350463	eukaryotic	eukaryotic
3708.A0A078GUG9	3	1	1	1	1	7	80379030	45943548	0.339567	0.350463	eukaryotic	eukaryotic
3708.A0A078H0V0	3	1	1	1	1	7	50776418	45943548	0.341997	0.350463	eukaryotic	eukaryotic
3708.A0A078H1S0	3	1	1	1	1	7	51699380	45943548	0.335991	0.350463	eukaryotic	eukaryotic
3708.A0A078HBK9	3	1	1	1	1	7	36080979	45943548	0.33692	0.350463	eukaryotic	eukaryotic
3708.A0A078HBS9	3	1	1	1	1	7	31473443	45943548	0.336968	0.350463	eukaryotic	eukaryotic
3708.A0A078HG89	3	1	1	1	1	7	23556787	45943548	0.319972	0.350463	eukaryotic	eukaryotic
3708.A0A078HQ66	3	1	1	1	1	7	35332831	45943548	0.333872	0.350463	eukaryotic	eukaryotic
3708.A0A078HQK3	3	1	1	1	1	7	35332831	45943548	0.333872	0.350463	eukaryotic	eukaryotic
3708.A0A078HS08	3	1	1	1	1	7	70552673	45943548	0.339245	0.350463	eukaryotic	eukaryotic
3708.A0A078HSN3	3	1	1	1	1	7	68396430	45943548	0.339372	0.350463	eukaryotic	eukaryotic
3708.A0A078HTC6	3	1	1	1	1	7	36080979	45943548	0.33692	0.350463	eukaryotic	eukaryotic
3708.A0A078HU21	3	1	1	1	1	7	45943548	45943548	0.330156	0.350463	eukaryotic	eukaryotic
3708.A0A078HV64	3	1	1	1	1	7	51699380	45943548	0.335991	0.350463	eukaryotic	eukaryotic
3708.A0A078I1P3	3	1	1	1	1	7	35332831	45943548	0.333872	0.350463	eukaryotic	eukaryotic
3708.A0A078I1W7	3	1	1	1	1	7	35822560	45943548	0.337747	0.350463	eukaryotic	eukaryotic
3708.A0A078I828	3	1	1	1	1	7	62442588	45943548	0.339503	0.350463	eukaryotic	eukaryotic
3708.A0A078IHR1	3	1	1	1	1	7	51699380	45943548	0.335991	0.350463	eukaryotic	eukaryotic
3708.A0A078IKZ9	3	1	1	1	1	7	35332831	45943548	0.333872	0.350463	eukaryotic	eukaryotic
3708.A0A078IMA2	3	1	1	1	1	7	35332831	45943548	0.333872	0.350463	eukaryotic	eukaryotic
3708.A0A078IZT0	3	1	1	1	1	7	45943548	45943548	0.330156	0.350463	eukaryotic	eukaryotic
3708.A0A078J3C3	3	1	1	1	1	7	70552673	45943548	0.339245	0.350463	eukaryotic	eukaryotic
3708.A0A078J412	3	1	1	1	1	7	36080979	45943548	0.33692	0.350463	eukaryotic	eukaryotic
3708.A0A078J7Q7	3	1	1	1	1	7	51699380	45943548	0.335991	0.350463	eukaryotic	eukaryotic
3708.A0A078K020	3	1	1	1	1	7	23556787	45943548	0.319972	0.350463	eukaryotic	eukaryotic
3708.Q42622	3	1	1	1	1	7	31473443	45943548	0.336968	0.350463	eukaryotic	eukaryotic
37653.A0A0L8G0T6	3	1	1	1	1	7	410458	475183	0.327809	0.338793	eukaryotic	eukaryotic
37653.A0A0L8GLN7	3	1	1	1	1	7	428527	475183	0.333125	0.338793	eukaryotic	eukaryotic
37653.A0A0L8HAC3	3	1	1	1	1	7	1246786	475183	0.339016	0.338793	eukaryotic	eukaryotic
3847.A0A0R0FFI0	3	1	1	1	1	7	58018743	48577506	0.341061	0.323422	eukaryotic	eukaryotic
3847.A0A0R0GH70	3	1	1	1	1	7	49042193	48577506	0.346427	0.323422	eukaryotic	eukaryotic
3847.A0A0R0GJ99	3	1	1	1	1	7	49042193	48577506	0.346427	0.323422	eukaryotic	eukaryotic
3847.A0A0R0HBU8	3	1	1	1	1	7	34766868	48577506	0.336303	0.323422	eukaryotic	eukaryotic
3847.A0A0R0HT11	3	1	1	1	1	7	51566899	48577506	0.341216	0.323422	eukaryotic	eukaryotic
3847.A0A0R4J4H6	3	1	1	1	1	7	40091315	48577506	0.338824	0.323422	eukaryotic	eukaryotic
3847.C6T2R2	3	1	1	1	1	7	45874163	48577506	0.331918	0.323422	eukaryotic	eukaryotic
3847.C6TL11	3	1	1	1	1	7	42234499	48577506	0.341973	0.323422	eukaryotic	eukaryotic
3847.I1J626	3	1	1	1	1	7	56831625	48577506	0.34827	0.323422	eukaryotic	eukaryotic
3847.I1J9U5	3	1	1	1	1	7	56831625	48577506	0.34827	0.323422	eukaryotic	eukaryotic
3847.I1JJV2	3	1	1	1	1	7	49042193	48577506	0.346427	0.323422	eukaryotic	eukaryotic
3847.I1JRW5	3	1	1	1	1	7	50746917	48577506	0.344802	0.323422	eukaryotic	eukaryotic
3847.I1JT81	3	1	1	1	1	7	51416487	48577506	0.335162	0.323422	eukaryotic	eukaryotic
3847.I1JXZ2	3	1	1	1	1	7	52389147	48577506	0.348753	0.323422	eukaryotic	eukaryotic
3847.I1JZE1	3	1	1	1	1	7	52389147	48577506	0.348753	0.323422	eukaryotic	eukaryotic
3847.I1K0E4	3	1	1	1	1	7	42234499	48577506	0.341973	0.323422	eukaryotic	eukaryotic
3847.I1K197	3	1	1	1	1	7	42234499	48577506	0.341973	0.323422	eukaryotic	eukaryotic
3847.I1K4J2	3	1	1	1	1	7	47837941	48577506	0.336062	0.323422	eukaryotic	eukaryotic
3847.I1K7P4	3	1	1	1	1	7	51416487	48577506	0.335162	0.323422	eukaryotic	eukaryotic
3847.I1KAA7	3	1	1	1	1	7	51416487	48577506	0.335162	0.323422	eukaryotic	eukaryotic
3847.I1KFB5	3	1	1	1	1	7	51416487	48577506	0.335162	0.323422	eukaryotic	eukaryotic
3847.I1KTG8	3	1	1	1	1	7	47837941	48577506	0.336062	0.323422	eukaryotic	eukaryotic
3847.I1KZ27	3	1	1	1	1	7	47837941	48577506	0.336062	0.323422	eukaryotic	eukaryotic
3847.I1L5G9	3	1	1	1	1	7	50189765	48577506	0.342234	0.323422	eukaryotic	eukaryotic
3847.I1L959	3	1	1	1	1	7	51566899	48577506	0.341216	0.323422	eukaryotic	eukaryotic
3847.I1LDI9	3	1	1	1	1	7	51566899	48577506	0.341216	0.323422	eukaryotic	eukaryotic
3847.I1LFT3	3	1	1	1	1	7	34766868	48577506	0.336303	0.323422	eukaryotic	eukaryotic
3847.I1LGR6	3	1	1	1	1	7	34766868	48577506	0.336303	0.323422	eukaryotic	eukaryotic
3847.I1LJ81	3	1	1	1	1	7	40091315	48577506	0.338824	0.323422	eukaryotic	eukaryotic
3847.I1LTP7	3	1	1	1	1	7	40091315	48577506	0.338824	0.323422	eukaryotic	eukaryotic
3847.I1LU61	3	1	1	1	1	7	45874163	48577506	0.331918	0.323422	eukaryotic	eukaryotic
3847.I1M650	3	1	1	1	1	7	49042193	48577506	0.346427	0.323422	eukaryotic	eukaryotic
3847.I1M9T9	3	1	1	1	1	7	49042193	48577506	0.346427	0.323422	eukaryotic	eukaryotic
3847.I1MDT8	3	1	1	1	1	7	47837941	48577506	0.336062	0.323422	eukaryotic	eukaryotic
3847.I1MUQ7	3	1	1	1	1	7	42234499	48577506	0.341973	0.323422	eukaryotic	eukaryotic
3847.I1N9P9	3	1	1	1	1	7	50746917	48577506	0.344802	0.323422	eukaryotic	eukaryotic
3847.I1N9R7	3	1	1	1	1	7	50746917	48577506	0.344802	0.323422	eukaryotic	eukaryotic
3847.I1NDE0	3	1	1	1	1	7	47904182	48577506	0.346857	0.323422	eukaryotic	eukaryotic
3847.K7K4C7	3	1	1	1	1	7	56831625	48577506	0.34827	0.323422	eukaryotic	eukaryotic
3847.K7KJC0	3	1	1	1	1	7	52389147	48577506	0.348753	0.323422	eukaryotic	eukaryotic
3847.K7KPM5	3	1	1	1	1	7	42234499	48577506	0.341973	0.323422	eukaryotic	eukaryotic
3847.K7KTY5	3	1	1	1	1	7	51416487	48577506	0.335162	0.323422	eukaryotic	eukaryotic
3847.K7LFH4	3	1	1	1	1	7	50189765	48577506	0.342234	0.323422	eukaryotic	eukaryotic
3847.K7LJM6	3	1	1	1	1	7	51566899	48577506	0.341216	0.323422	eukaryotic	eukaryotic
3847.K7LSE9	3	1	1	1	1	7	40091315	48577506	0.338824	0.323422	eukaryotic	eukaryotic
3847.K7LWV7	3	1	1	1	1	7	45874163	48577506	0.331918	0.323422	eukaryotic	eukaryotic
3847.K7MVR5	3	1	1	1	1	7	50746917	48577506	0.344802	0.323422	eukaryotic	eukaryotic
396360.AIPGENE14902	3	1	1	1	1	7	692903	442146	0.29898	0.336862	eukaryotic	eukaryotic
396360.AIPGENE15104	3	1	1	1	1	7	333078	442146	0.343559	0.336862	eukaryotic	eukaryotic
396360.AIPGENE16122	3	1	1	1	1	7	408653	442146	0.3297	0.336862	eukaryotic	eukaryotic
396360.AIPGENE16395	3	1	1	1	1	7	1019856	442146	0.300432	0.336862	eukaryotic	eukaryotic
396360.AIPGENE2147	3	1	1	1	1	7	898852	442146	0.280471	0.336862	eukaryotic	eukaryotic
396360.AIPGENE21473	3	1	1	1	1	7	450478	442146	0.312572	0.336862	eukaryotic	eukaryotic
396360.AIPGENE22444	3	1	1	1	1	7	843742	442146	0.335305	0.336862	eukaryotic	eukaryotic
396360.AIPGENE22506	3	1	1	1	1	7	843742	442146	0.335305	0.336862	eukaryotic	eukaryotic
396360.AIPGENE25089	3	1	1	1	1	7	572878	442146	0.334005	0.336862	eukaryotic	eukaryotic
396360.AIPGENE27012	3	1	1	1	1	7	1499708	442146	0.293933	0.336862	eukaryotic	eukaryotic
396360.AIPGENE3801	3	1	1	1	1	7	472045	442146	0.331227	0.336862	eukaryotic	eukaryotic
396360.AIPGENE5853	3	1	1	1	1	7	1176555	442146	0.340895	0.336862	eukaryotic	eukaryotic
396360.AIPGENE6142	3	1	1	1	1	7	1085663	442146	0.29493	0.336862	eukaryotic	eukaryotic
396360.AIPGENE6893	3	1	1	1	1	7	868416	442146	0.30937	0.336862	eukaryotic	eukaryotic
396360.AIPGENE9073	3	1	1	1	1	7	1081720	442146	0.318716	0.336862	eukaryotic	eukaryotic
396360.AIPGENE9366	3	1	1	1	1	7	453430	442146	0.314381	0.336862	eukaryotic	eukaryotic
39947.A0A0P0UXJ0	3	1	1	1	1	7	43270924	29958435	0.437577	0.436901	eukaryotic	eukaryotic
39947.A0A0P0X7S2	3	1	1	1	1	7	29697622	29958435	0.434902	0.436901	eukaryotic	eukaryotic
39947.A0A0P0XJS0	3	1	1	1	1	7	28443023	29958435	0.433772	0.436901	eukaryotic	eukaryotic
39947.A0A0P0XPT6	3	1	1	1	1	7	23012721	29958435	0.4351	0.436901	eukaryotic	eukaryotic
39947.A0A0P0XYY7	3	1	1	1	1	7	29021107	29958435	0.428877	0.436901	eukaryotic	eukaryotic
39947.A0A0P0YCB1	3	1	1	1	1	7	28443023	29958435	0.433772	0.436901	eukaryotic	eukaryotic
39947.C7J5J8	3	1	1	1	1	7	28443023	29958435	0.433772	0.436901	eukaryotic	eukaryotic
39947.O22105	3	1	1	1	1	7	36413820	29958435	0.436776	0.436901	eukaryotic	eukaryotic
39947.Q0DY92	3	1	1	1	1	7	35937251	29958435	0.433207	0.436901	eukaryotic	eukaryotic
39947.Q0IQ60	3	1	1	1	1	7	27531857	29958435	0.430008	0.436901	eukaryotic	eukaryotic
39947.Q0J0N6	3	1	1	1	1	7	23012721	29958435	0.4351	0.436901	eukaryotic	eukaryotic
39947.Q10CW0	3	1	1	1	1	7	36413820	29958435	0.436776	0.436901	eukaryotic	eukaryotic
39947.Q10N92	3	1	1	1	1	7	36413820	29958435	0.436776	0.436901	eukaryotic	eukaryotic
39947.Q10P42	3	1	1	1	1	7	36413820	29958435	0.436776	0.436901	eukaryotic	eukaryotic
39947.Q337N3	3	1	1	1	1	7	23207288	29958435	0.435493	0.436901	eukaryotic	eukaryotic
39947.Q5Z9H5	3	1	1	1	1	7	31248788	29958435	0.435825	0.436901	eukaryotic	eukaryotic
39947.Q67UP5	3	1	1	1	1	7	31248788	29958435	0.435825	0.436901	eukaryotic	eukaryotic
39947.Q6ETK8	3	1	1	1	1	7	35937251	29958435	0.433207	0.436901	eukaryotic	eukaryotic
39947.Q6YZ54	3	1	1	1	1	7	35937251	29958435	0.433207	0.436901	eukaryotic	eukaryotic
39947.Q6ZBS0	3	1	1	1	1	7	28443023	29958435	0.433772	0.436901	eukaryotic	eukaryotic
39947.Q6ZD35	3	1	1	1	1	7	28443023	29958435	0.433772	0.436901	eukaryotic	eukaryotic
39947.Q7XRX1	3	1	1	1	1	7	35502695	29958435	0.442264	0.436901	eukaryotic	eukaryotic
39947.Q7XTS6	3	1	1	1	1	7	35502695	29958435	0.442264	0.436901	eukaryotic	eukaryotic
39947.Q7XUK6	3	1	1	1	1	7	35502695	29958435	0.442264	0.436901	eukaryotic	eukaryotic
39947.Q7Y1V2	3	1	1	1	1	7	31248788	29958435	0.435825	0.436901	eukaryotic	eukaryotic
39947.Q84ZL5	3	1	1	1	1	7	28443023	29958435	0.433772	0.436901	eukaryotic	eukaryotic
39947.Q852K3	3	1	1	1	1	7	36413820	29958435	0.436776	0.436901	eukaryotic	eukaryotic
39947.Q9FXM3	3	1	1	1	1	7	27531857	29958435	0.430008	0.436901	eukaryotic	eukaryotic
403677.D0MR53	3	1	1	1	1	7	6928288	1588623	0.473068	0.514941	eukaryotic	eukaryotic
403677.D0MWJ8	3	1	1	1	1	7	5458068	1588623	0.481898	0.514941	eukaryotic	eukaryotic
403677.D0MZ85	3	1	1	1	1	7	5137562	1588623	0.47693	0.514941	eukaryotic	eukaryotic
403677.D0N047	3	1	1	1	1	7	5137562	1588623	0.47693	0.514941	eukaryotic	eukaryotic
403677.D0N1M1	3	1	1	1	1	7	4722446	1588623	0.478093	0.514941	eukaryotic	eukaryotic
403677.D0N413	3	1	1	1	1	7	4595943	1588623	0.486865	0.514941	eukaryotic	eukaryotic
403677.D0N7Z6	3	1	1	1	1	7	3761765	1588623	0.475244	0.514941	eukaryotic	eukaryotic
403677.D0NEW7	3	1	1	1	1	7	2518707	1588623	0.472681	0.514941	eukaryotic	eukaryotic
403677.D0NFB6	3	1	1	1	1	7	2518707	1588623	0.472681	0.514941	eukaryotic	eukaryotic
403677.D0NG73	3	1	1	1	1	7	2398069	1588623	0.483643	0.514941	eukaryotic	eukaryotic
403677.D0NJ14	3	1	1	1	1	7	2281021	1588623	0.463745	0.514941	eukaryotic	eukaryotic
403677.D0NJQ2	3	1	1	1	1	7	2165784	1588623	0.467434	0.514941	eukaryotic	eukaryotic
403677.D0NJS3	3	1	1	1	1	7	2165784	1588623	0.467434	0.514941	eukaryotic	eukaryotic
403677.D0NPY9	3	1	1	1	1	7	1799397	1588623	0.4283	0.514941	eukaryotic	eukaryotic
403677.D0NQM1	3	1	1	1	1	7	1665392	1588623	0.438814	0.514941	eukaryotic	eukaryotic
403677.D0NQM3	3	1	1	1	1	7	1665392	1588623	0.438814	0.514941	eukaryotic	eukaryotic
403677.D0NVQ6	3	1	1	1	1	7	932875	1588623	0.472192	0.514941	eukaryotic	eukaryotic
4081.K4AY00	3	1	1	1	1	7	98455870	66723568	0.302653	0.359522	eukaryotic	eukaryotic
4081.K4AZT0	3	1	1	1	1	7	66723568	66723568	0.314092	0.359522	eukaryotic	eukaryotic
4081.K4B7H5	3	1	1	1	1	7	55977581	66723568	0.293283	0.359522	eukaryotic	eukaryotic
4081.K4B7P6	3	1	1	1	1	7	55977581	66723568	0.293283	0.359522	eukaryotic	eukaryotic
4081.K4BAK3	3	1	1	1	1	7	55977581	66723568	0.293283	0.359522	eukaryotic	eukaryotic
4081.K4BLW8	3	1	1	1	1	7	72290147	66723568	0.289513	0.359522	eukaryotic	eukaryotic
4081.K4BP99	3	1	1	1	1	7	66557039	66723568	0.306993	0.359522	eukaryotic	eukaryotic
4081.K4BWD6	3	1	1	1	1	7	66723568	66723568	0.314092	0.359522	eukaryotic	eukaryotic
4081.K4BWQ8	3	1	1	1	1	7	65987441	66723568	0.311706	0.359522	eukaryotic	eukaryotic
4081.K4C152	3	1	1	1	1	7	66723568	66723568	0.314092	0.359522	eukaryotic	eukaryotic
4081.K4C2P8	3	1	1	1	1	7	66723568	66723568	0.314092	0.359522	eukaryotic	eukaryotic
4081.K4C5K7	3	1	1	1	1	7	49794277	66723568	0.300156	0.359522	eukaryotic	eukaryotic
4081.K4CF73	3	1	1	1	1	7	68175700	66723568	0.312818	0.359522	eukaryotic	eukaryotic
4081.K4CM83	3	1	1	1	1	7	65987441	66723568	0.311706	0.359522	eukaryotic	eukaryotic
4081.K4CM84	3	1	1	1	1	7	65987441	66723568	0.311706	0.359522	eukaryotic	eukaryotic
4081.K4CM87	3	1	1	1	1	7	65987441	66723568	0.311706	0.359522	eukaryotic	eukaryotic
4081.K4CM89	3	1	1	1	1	7	65987441	66723568	0.311706	0.359522	eukaryotic	eukaryotic
4081.K4CQ20	3	1	1	1	1	7	72906346	66723568	0.30622	0.359522	eukaryotic	eukaryotic
4081.K4CQR4	3	1	1	1	1	7	72906346	66723568	0.30622	0.359522	eukaryotic	eukaryotic
4081.K4CYF6	3	1	1	1	1	7	65633394	66723568	0.328375	0.359522	eukaryotic	eukaryotic
4081.K4D2E5	3	1	1	1	1	7	65633394	66723568	0.328375	0.359522	eukaryotic	eukaryotic
4081.K4D406	3	1	1	1	1	7	65633394	66723568	0.328375	0.359522	eukaryotic	eukaryotic
4081.K4D686	3	1	1	1	1	7	56597136	66723568	0.305904	0.359522	eukaryotic	eukaryotic
4081.K4D9S2	3	1	1	1	1	7	56597136	66723568	0.305904	0.359522	eukaryotic	eukaryotic
4081.K4DHD2	3	1	1	1	1	7	68126177	66723568	0.312465	0.359522	eukaryotic	eukaryotic
4081.Q1KSC6	3	1	1	1	1	7	65987441	66723568	0.311706	0.359522	eukaryotic	eukaryotic
4081.Q71LX7	3	1	1	1	1	7	55977581	66723568	0.293283	0.359522	eukaryotic	eukaryotic
41875.K8E9I8	3	1	1	1	1	7	1352725	955653	0.488612	0.483022	eukaryotic	eukaryotic
41875.K8ECM3	3	1	1	1	1	7	1091009	955653	0.485488	0.483022	eukaryotic	eukaryotic
41875.K8ED41	3	1	1	1	1	7	1037992	955653	0.482864	0.483022	eukaryotic	eukaryotic
41875.K8EJ69	3	1	1	1	1	7	794369	955653	0.48362	0.483022	eukaryotic	eukaryotic
41875.K8EJ92	3	1	1	1	1	7	794369	955653	0.48362	0.483022	eukaryotic	eukaryotic
41875.K8ENE6	3	1	1	1	1	7	663425	955653	0.422387	0.483022	eukaryotic	eukaryotic
41875.K8ENT3	3	1	1	1	1	7	663425	955653	0.422387	0.483022	eukaryotic	eukaryotic
41875.K8EXL7	3	1	1	1	1	7	989708	955653	0.483022	0.483022	eukaryotic	eukaryotic
41875.K8EXQ9	3	1	1	1	1	7	989708	955653	0.483022	0.483022	eukaryotic	eukaryotic
41875.K8EYT1	3	1	1	1	1	7	1352725	955653	0.488612	0.483022	eukaryotic	eukaryotic
41875.K8F1D6	3	1	1	1	1	7	955653	955653	0.483864	0.483022	eukaryotic	eukaryotic
41875.K8F1Q1	3	1	1	1	1	7	955653	955653	0.483864	0.483022	eukaryotic	eukaryotic
41875.K8F1T3	3	1	1	1	1	7	955653	955653	0.483864	0.483022	eukaryotic	eukaryotic
41875.K8F9F6	3	1	1	1	1	7	794369	955653	0.48362	0.483022	eukaryotic	eukaryotic
41875.K8FBF0	3	1	1	1	1	7	712460	955653	0.482577	0.483022	eukaryotic	eukaryotic
41875.K8FHV1	3	1	1	1	1	7	955653	955653	0.483864	0.483022	eukaryotic	eukaryotic
431595.K3W7D6	3	1	1	1	1	7	1683197	837834	0.519128	0.497405	eukaryotic	eukaryotic
431595.K3WD69	3	1	1	1	1	7	1316297	837834	0.464281	0.497405	eukaryotic	eukaryotic
431595.K3WHU3	3	1	1	1	1	7	1169326	837834	0.528937	0.497405	eukaryotic	eukaryotic
431595.K3WHX3	3	1	1	1	1	7	1169326	837834	0.528937	0.497405	eukaryotic	eukaryotic
431595.K3WHX5	3	1	1	1	1	7	1169326	837834	0.528937	0.497405	eukaryotic	eukaryotic
431595.K3WP90	3	1	1	1	1	7	913259	837834	0.485257	0.497405	eukaryotic	eukaryotic
431595.K3WPY4	3	1	1	1	1	7	870538	837834	0.522223	0.497405	eukaryotic	eukaryotic
431595.K3WTU6	3	1	1	1	1	7	784521	837834	0.526206	0.497405	eukaryotic	eukaryotic
431595.K3WVX3	3	1	1	1	1	7	696190	837834	0.48581	0.497405	eukaryotic	eukaryotic
431595.K3WVZ5	3	1	1	1	1	7	696190	837834	0.48581	0.497405	eukaryotic	eukaryotic
431595.K3WX31	3	1	1	1	1	7	692779	837834	0.49896	0.497405	eukaryotic	eukaryotic
431595.K3WYB2	3	1	1	1	1	7	666938	837834	0.497292	0.497405	eukaryotic	eukaryotic
431595.K3WZS6	3	1	1	1	1	7	580910	837834	0.5064	0.497405	eukaryotic	eukaryotic
432359.A0A125YX02	3	1	1	1	1	7	2499704	3773820	0.516745	0.543243	eukaryotic	eukaryotic
432359.B6KLD3	3	1	1	1	1	7	4599544	3773820	0.51884	0.543243	eukaryotic	eukaryotic
432359.B9PRT0	3	1	1	1	1	7	4970801	3773820	0.519538	0.543243	eukaryotic	eukaryotic
436017.A4RQE9	3	1	1	1	1	7	1152509	708928	0.603561	0.606797	eukaryotic	eukaryotic
436017.A4RU81	3	1	1	1	1	7	982988	708928	0.600835	0.606797	eukaryotic	eukaryotic
436017.A4RV95	3	1	1	1	1	7	982988	708928	0.600835	0.606797	eukaryotic	eukaryotic
436017.A4RVX8	3	1	1	1	1	7	930725	708928	0.604888	0.606797	eukaryotic	eukaryotic
436017.A4RVY1	3	1	1	1	1	7	930725	708928	0.604888	0.606797	eukaryotic	eukaryotic
436017.A4RZK3	3	1	1	1	1	7	783247	708928	0.606797	0.606797	eukaryotic	eukaryotic
436017.A4RZL1	3	1	1	1	1	7	783247	708928	0.606797	0.606797	eukaryotic	eukaryotic
436017.A4S0F8	3	1	1	1	1	7	783247	708928	0.606797	0.606797	eukaryotic	eukaryotic
436017.A4S0H5	3	1	1	1	1	7	783247	708928	0.606797	0.606797	eukaryotic	eukaryotic
436017.A4S1T4	3	1	1	1	1	7	701772	708928	0.607555	0.606797	eukaryotic	eukaryotic
436017.A4S2I1	3	1	1	1	1	7	670854	708928	0.614812	0.606797	eukaryotic	eukaryotic
436017.A4S2J1	3	1	1	1	1	7	670854	708928	0.614812	0.606797	eukaryotic	eukaryotic
436017.A4S2P7	3	1	1	1	1	7	670854	708928	0.614812	0.606797	eukaryotic	eukaryotic
436017.A4S380	3	1	1	1	1	7	670854	708928	0.614812	0.606797	eukaryotic	eukaryotic
436017.A4S5J3	3	1	1	1	1	7	538964	708928	0.604617	0.606797	eukaryotic	eukaryotic
436017.A4S5R8	3	1	1	1	1	7	538964	708928	0.604617	0.606797	eukaryotic	eukaryotic
436017.A4S5W4	3	1	1	1	1	7	538964	708928	0.604617	0.606797	eukaryotic	eukaryotic
436017.A4S6D3	3	1	1	1	1	7	528470	708928	0.61134	0.606797	eukaryotic	eukaryotic
436017.A4SAW9	3	1	1	1	1	7	549134	708928	0.616469	0.606797	eukaryotic	eukaryotic
441375.B6A985	3	1	1	1	1	7	1324931	723784	0.286502	0.290755	eukaryotic	eukaryotic
441375.B6AA15	3	1	1	1	1	7	1324931	723784	0.286502	0.290755	eukaryotic	eukaryotic
441375.B6AAJ5	3	1	1	1	1	7	1324931	723784	0.286502	0.290755	eukaryotic	eukaryotic
441375.B6AAS6	3	1	1	1	1	7	1306718	723784	0.282745	0.290755	eukaryotic	eukaryotic
441375.B6AAU9	3	1	1	1	1	7	1306718	723784	0.282745	0.290755	eukaryotic	eukaryotic
441375.B6ABD9	3	1	1	1	1	7	1306718	723784	0.282745	0.290755	eukaryotic	eukaryotic
441375.B6AC31	3	1	1	1	1	7	1306718	723784	0.282745	0.290755	eukaryotic	eukaryotic
441375.B6AFZ6	3	1	1	1	1	7	567911	723784	0.278051	0.290755	eukaryotic	eukaryotic
441375.B6AG69	3	1	1	1	1	7	567911	723784	0.278051	0.290755	eukaryotic	eukaryotic
441375.B6AGM9	3	1	1	1	1	7	528545	723784	0.295829	0.290755	eukaryotic	eukaryotic
441375.B6AH16	3	1	1	1	1	7	528545	723784	0.295829	0.290755	eukaryotic	eukaryotic
441375.B6AI07	3	1	1	1	1	7	378466	723784	0.289281	0.290755	eukaryotic	eukaryotic
441375.B6AI59	3	1	1	1	1	7	378466	723784	0.289281	0.290755	eukaryotic	eukaryotic
441894.A0A093H2A1	3	1	1	1	1	7	3752350	3593426	0.409274	0.459784	eukaryotic	eukaryotic
441894.A0A093HVH0	3	1	1	1	1	7	5214577	3593426	0.430726	0.459784	eukaryotic	eukaryotic
441894.A0A093HZQ7	3	1	1	1	1	7	4133304	3593426	0.434351	0.459784	eukaryotic	eukaryotic
441894.A0A093JTN4	3	1	1	1	1	7	3516286	3593426	0.389533	0.459784	eukaryotic	eukaryotic
45351.A7RIS7	3	1	1	1	1	7	2343874	472589	0.382361	0.272913	eukaryotic	eukaryotic
45351.A7RRU7	3	1	1	1	1	7	1571464	472589	0.385304	0.272913	eukaryotic	eukaryotic
45351.A7S068	3	1	1	1	1	7	1158650	472589	0.394312	0.272913	eukaryotic	eukaryotic
45351.A7S2B7	3	1	1	1	1	7	1036593	472589	0.380128	0.272913	eukaryotic	eukaryotic
45351.A7S360	3	1	1	1	1	7	1012693	472589	0.375905	0.272913	eukaryotic	eukaryotic
45351.A7S5R5	3	1	1	1	1	7	925858	472589	0.364814	0.272913	eukaryotic	eukaryotic
45351.A7S766	3	1	1	1	1	7	811769	472589	0.398112	0.272913	eukaryotic	eukaryotic
45351.A7S771	3	1	1	1	1	7	811769	472589	0.398112	0.272913	eukaryotic	eukaryotic
45351.A7S8F9	3	1	1	1	1	7	827252	472589	0.390851	0.272913	eukaryotic	eukaryotic
45351.A7SAT1	3	1	1	1	1	7	750940	472589	0.366316	0.272913	eukaryotic	eukaryotic
45351.A7SCT0	3	1	1	1	1	7	668777	472589	0.367249	0.272913	eukaryotic	eukaryotic
45351.A7SCZ8	3	1	1	1	1	7	660056	472589	0.374642	0.272913	eukaryotic	eukaryotic
45351.A7SDY7	3	1	1	1	1	7	629889	472589	0.394841	0.272913	eukaryotic	eukaryotic
45351.A7SL38	3	1	1	1	1	7	463575	472589	0.358671	0.272913	eukaryotic	eukaryotic
45351.A7SMS4	3	1	1	1	1	7	431266	472589	0.373354	0.272913	eukaryotic	eukaryotic
4572.M7YG15	3	1	1	1	1	7	719689838	661480604	0.454807	0.446875	eukaryotic	eukaryotic
4572.M7YMY4	3	1	1	1	1	7	719689838	661480604	0.454807	0.446875	eukaryotic	eukaryotic
4572.M7YS03	3	1	1	1	1	7	747046675	661480604	0.456386	0.446875	eukaryotic	eukaryotic
4572.M7Z4T2	3	1	1	1	1	7	753719115	661480604	0.456742	0.446875	eukaryotic	eukaryotic
4572.M7Z6Z5	3	1	1	1	1	7	753719115	661480604	0.456742	0.446875	eukaryotic	eukaryotic
4572.M7ZM04	3	1	1	1	1	7	747046675	661480604	0.456386	0.446875	eukaryotic	eukaryotic
4572.M7ZW06	3	1	1	1	1	7	584211918	661480604	0.456135	0.446875	eukaryotic	eukaryotic
4572.M7ZX55	3	1	1	1	1	7	747046675	661480604	0.456386	0.446875	eukaryotic	eukaryotic
4572.M8A5Z7	3	1	1	1	1	7	575865108	661480604	0.457077	0.446875	eukaryotic	eukaryotic
4572.T1LT03	3	1	1	1	1	7	719689838	661480604	0.454807	0.446875	eukaryotic	eukaryotic
4572.T1NCW4	3	1	1	1	1	7	661480604	661480604	0.456344	0.446875	eukaryotic	eukaryotic
4572.T1NWT8	3	1	1	1	1	7	619584426	661480604	0.457721	0.446875	eukaryotic	eukaryotic
4577.A0A1D6DZ98	3	1	1	1	1	7	244442277	223902241	0.46152	0.463303	eukaryotic	eukaryotic
4577.A0A1D6F2B9	3	1	1	1	1	7	244442277	223902241	0.46152	0.463303	eukaryotic	eukaryotic
4577.A0A1D6GER5	3	1	1	1	1	7	223902241	223902241	0.462534	0.463303	eukaryotic	eukaryotic
4577.A0A1D6GFT1	3	1	1	1	1	7	223902241	223902241	0.462534	0.463303	eukaryotic	eukaryotic
4577.A0A1D6GH80	3	1	1	1	1	7	223902241	223902241	0.462534	0.463303	eukaryotic	eukaryotic
4577.A0A1D6GTV7	3	1	1	1	1	7	223902241	223902241	0.462534	0.463303	eukaryotic	eukaryotic
4577.A0A1D6HA22	3	1	1	1	1	7	223902241	223902241	0.462534	0.463303	eukaryotic	eukaryotic
4577.A0A1D6IA96	3	1	1	1	1	7	182381543	223902241	0.461886	0.463303	eukaryotic	eukaryotic
4577.A0A1D6IU93	3	1	1	1	1	7	150982315	223902241	0.463424	0.463303	eukaryotic	eukaryotic
4577.A0A1D6JEI4	3	1	1	1	1	7	150982315	223902241	0.463424	0.463303	eukaryotic	eukaryotic
4577.A0A1D6L4B1	3	1	1	1	1	7	307041718	223902241	0.463682	0.463303	eukaryotic	eukaryotic
4577.A0A1D6N675	3	1	1	1	1	7	235667835	223902241	0.464105	0.463303	eukaryotic	eukaryotic
4577.A0A1D6PVS4	3	1	1	1	1	7	246994606	223902241	0.457711	0.463303	eukaryotic	eukaryotic
4577.A0A1D6PW39	3	1	1	1	1	7	246994606	223902241	0.457711	0.463303	eukaryotic	eukaryotic
4577.A0A1D6Q822	3	1	1	1	1	7	246994606	223902241	0.457711	0.463303	eukaryotic	eukaryotic
4577.B4FBV7	3	1	1	1	1	7	244442277	223902241	0.46152	0.463303	eukaryotic	eukaryotic
4577.B4FUJ1	3	1	1	1	1	7	150982315	223902241	0.463424	0.463303	eukaryotic	eukaryotic
4577.C0HES6	3	1	1	1	1	7	223902241	223902241	0.462534	0.463303	eukaryotic	eukaryotic
4577.C0PFX3	3	1	1	1	1	7	181122638	223902241	0.46372	0.463303	eukaryotic	eukaryotic
4577.C0PGQ1	3	1	1	1	1	7	246994606	223902241	0.457711	0.463303	eukaryotic	eukaryotic
4577.C4IYW6	3	1	1	1	1	7	246994606	223902241	0.457711	0.463303	eukaryotic	eukaryotic
4577.K7TLM0	3	1	1	1	1	7	150982315	223902241	0.463424	0.463303	eukaryotic	eukaryotic
4577.K7UFI0	3	1	1	1	1	7	246994606	223902241	0.457711	0.463303	eukaryotic	eukaryotic
4577.Q9SE94	3	1	1	1	1	7	307041718	223902241	0.463682	0.463303	eukaryotic	eukaryotic
47790.A0A2J8A1C2	3	1	1	1	1	7	152214	145928	0.424547	0.651245	eukaryotic	eukaryotic
47790.A0A2J8A874	3	1	1	1	1	7	236470	145928	0.507502	0.651245	eukaryotic	eukaryotic
4781.A0A0N7L654	3	1	1	1	1	7	2021494	1546206	0.391024	0.455776	eukaryotic	eukaryotic
4781.A0A0P1A584	3	1	1	1	1	7	2288133	1546206	0.39983	0.455776	eukaryotic	eukaryotic
4781.A0A0P1A6P1	3	1	1	1	1	7	2288133	1546206	0.39983	0.455776	eukaryotic	eukaryotic
4781.A0A0P1AB32	3	1	1	1	1	7	1316031	1546206	0.394045	0.455776	eukaryotic	eukaryotic
4781.A0A0P1AB48	3	1	1	1	1	7	778694	1546206	0.433929	0.455776	eukaryotic	eukaryotic
4781.A0A0P1AFV3	3	1	1	1	1	7	1242543	1546206	0.416967	0.455776	eukaryotic	eukaryotic
4781.A0A0P1AHC5	3	1	1	1	1	7	1367572	1546206	0.404786	0.455776	eukaryotic	eukaryotic
4781.A0A0P1AMK5	3	1	1	1	1	7	2891728	1546206	0.404268	0.455776	eukaryotic	eukaryotic
4781.A0A0P1AZF2	3	1	1	1	1	7	2296536	1546206	0.401119	0.455776	eukaryotic	eukaryotic
4781.A0A0P1B017	3	1	1	1	1	7	1431974	1546206	0.402621	0.455776	eukaryotic	eukaryotic
483139.A0A2C6LCM2	3	1	1	1	1	7	57309	29980	0.520616	0.484062	eukaryotic	eukaryotic
50429.A0A2B4RJZ0	3	1	1	1	1	7	237586	457454	0.352626	0.362233	eukaryotic	eukaryotic
50429.A0A2B4S3D5	3	1	1	1	1	7	520610	457454	0.337345	0.362233	eukaryotic	eukaryotic
50429.A0A2B4S5P8	3	1	1	1	1	7	533363	457454	0.349256	0.362233	eukaryotic	eukaryotic
50429.A0A2B4SB76	3	1	1	1	1	7	802113	457454	0.343312	0.362233	eukaryotic	eukaryotic
50429.A0A2B4SBR9	3	1	1	1	1	7	728954	457454	0.356641	0.362233	eukaryotic	eukaryotic
50429.A0A2B4SHA1	3	1	1	1	1	7	787032	457454	0.33403	0.362233	eukaryotic	eukaryotic
510516.Q2TXV7	3	1	1	1	1	7	3395260	4887097	0.471604	0.470511	eukaryotic	eukaryotic
510516.Q2TYK5	3	1	1	1	1	7	3395260	4887097	0.471604	0.470511	eukaryotic	eukaryotic
510516.Q2TYU0	3	1	1	1	1	7	3395260	4887097	0.471604	0.470511	eukaryotic	eukaryotic
510516.Q2TZL3	3	1	1	1	1	7	2933482	4887097	0.470957	0.470511	eukaryotic	eukaryotic
510516.Q2TZM9	3	1	1	1	1	7	2933482	4887097	0.470957	0.470511	eukaryotic	eukaryotic
510516.Q2U197	3	1	1	1	1	7	2933482	4887097	0.470957	0.470511	eukaryotic	eukaryotic
510516.Q2U647	3	1	1	1	1	7	4533890	4887097	0.473676	0.470511	eukaryotic	eukaryotic
510516.Q2U6Q5	3	1	1	1	1	7	4533890	4887097	0.473676	0.470511	eukaryotic	eukaryotic
510516.Q2U962	3	1	1	1	1	7	4533890	4887097	0.473676	0.470511	eukaryotic	eukaryotic
510516.Q2U9N8	3	1	1	1	1	7	4887097	4887097	0.470065	0.470511	eukaryotic	eukaryotic
510516.Q2U9Y7	3	1	1	1	1	7	4887097	4887097	0.470065	0.470511	eukaryotic	eukaryotic
510516.Q2UFF5	3	1	1	1	1	7	5123685	4887097	0.471803	0.470511	eukaryotic	eukaryotic
510516.Q2UGC4	3	1	1	1	1	7	5123685	4887097	0.471803	0.470511	eukaryotic	eukaryotic
510516.Q2UI79	3	1	1	1	1	7	5123685	4887097	0.471803	0.470511	eukaryotic	eukaryotic
510516.Q2UPL6	3	1	1	1	1	7	6520267	4887097	0.472937	0.470511	eukaryotic	eukaryotic
510516.Q2UUI5	3	1	1	1	1	7	6520267	4887097	0.472937	0.470511	eukaryotic	eukaryotic
51314.U6LGG8	3	1	1	1	1	7	53188	33516	0.405674	0.497237	eukaryotic	eukaryotic
51511.H2Y8H6	3	1	1	1	1	7	713673	601537	0.332556	0.380606	eukaryotic	eukaryotic
51511.H2Y927	3	1	1	1	1	7	2313118	601537	0.346764	0.380606	eukaryotic	eukaryotic
51511.H2YFA6	3	1	1	1	1	7	537911	601537	0.355864	0.380606	eukaryotic	eukaryotic
51511.H2YRQ7	3	1	1	1	1	7	498651	601537	0.322725	0.380606	eukaryotic	eukaryotic
51511.H2YZ84	3	1	1	1	1	7	1120920	601537	0.345869	0.380606	eukaryotic	eukaryotic
51511.H2Z5Q6	3	1	1	1	1	7	1067593	601537	0.363719	0.380606	eukaryotic	eukaryotic
51511.H2Z6A3	3	1	1	1	1	7	1457213	601537	0.344282	0.380606	eukaryotic	eukaryotic
51511.H2ZBE8	3	1	1	1	1	7	1410389	601537	0.34105	0.380606	eukaryotic	eukaryotic
51511.H2ZCU1	3	1	1	1	1	7	1732395	601537	0.341043	0.380606	eukaryotic	eukaryotic
51511.H2ZHX7	3	1	1	1	1	7	3021312	601537	0.346085	0.380606	eukaryotic	eukaryotic
543379.A0A232EU57	3	1	1	1	1	7	37746	22351	0.419329	0.391538	eukaryotic	eukaryotic
543379.A0A232EUN9	3	1	1	1	1	7	24634	22351	0.401965	0.391538	eukaryotic	eukaryotic
543379.A0A232F1I0	3	1	1	1	1	7	35934	22351	0.369845	0.391538	eukaryotic	eukaryotic
543379.A0A232F2Q3	3	1	1	1	1	7	36802	22351	0.353187	0.391538	eukaryotic	eukaryotic
543379.A0A232F3N8	3	1	1	1	1	7	39300	22351	0.332926	0.391538	eukaryotic	eukaryotic
543379.A0A232F6J1	3	1	1	1	1	7	44739	22351	0.369677	0.391538	eukaryotic	eukaryotic
543379.A0A232F6X0	3	1	1	1	1	7	46387	22351	0.407054	0.391538	eukaryotic	eukaryotic
543379.A0A232F7T4	3	1	1	1	1	7	50948	22351	0.361761	0.391538	eukaryotic	eukaryotic
543379.A0A232FCZ3	3	1	1	1	1	7	62138	22351	0.401526	0.391538	eukaryotic	eukaryotic
543379.A0A232FDX0	3	1	1	1	1	7	119849	22351	0.403316	0.391538	eukaryotic	eukaryotic
543379.A0A232FIM8	3	1	1	1	1	7	93864	22351	0.429547	0.391538	eukaryotic	eukaryotic
554055.A0A2P6V7C7	3	1	1	1	1	7	895648	1210496	0.666227	0.666852	eukaryotic	eukaryotic
554055.A0A2P6VDR3	3	1	1	1	1	7	1385636	1210496	0.680317	0.666852	eukaryotic	eukaryotic
554055.A0A2P6VFD3	3	1	1	1	1	7	1600265	1210496	0.676194	0.666852	eukaryotic	eukaryotic
554055.A0A2P6VLG0	3	1	1	1	1	7	2733466	1210496	0.674	0.666852	eukaryotic	eukaryotic
554065.E1Z1V8	3	1	1	1	1	7	3119888	1469607	0.64126	0.615554	eukaryotic	eukaryotic
554065.E1Z1W6	3	1	1	1	1	7	3119888	1469607	0.64126	0.615554	eukaryotic	eukaryotic
554065.E1Z327	3	1	1	1	1	7	3119888	1469607	0.64126	0.615554	eukaryotic	eukaryotic
554065.E1Z5E8	3	1	1	1	1	7	2414370	1469607	0.639723	0.615554	eukaryotic	eukaryotic
554065.E1Z6Y2	3	1	1	1	1	7	2414370	1469607	0.639723	0.615554	eukaryotic	eukaryotic
554065.E1Z8B7	3	1	1	1	1	7	2291562	1469607	0.639752	0.615554	eukaryotic	eukaryotic
554065.E1Z8D0	3	1	1	1	1	7	2291562	1469607	0.639752	0.615554	eukaryotic	eukaryotic
554065.E1ZC83	3	1	1	1	1	7	1828857	1469607	0.643068	0.615554	eukaryotic	eukaryotic
554065.E1ZCQ9	3	1	1	1	1	7	1782912	1469607	0.637484	0.615554	eukaryotic	eukaryotic
554065.E1ZDS0	3	1	1	1	1	7	1632338	1469607	0.633643	0.615554	eukaryotic	eukaryotic
554065.E1ZEB3	3	1	1	1	1	7	1632338	1469607	0.633643	0.615554	eukaryotic	eukaryotic
554065.E1ZGY3	3	1	1	1	1	7	1469607	1469607	0.612006	0.615554	eukaryotic	eukaryotic
554065.E1ZH71	3	1	1	1	1	7	1469607	1469607	0.612006	0.615554	eukaryotic	eukaryotic
554065.E1ZI39	3	1	1	1	1	7	1343206	1469607	0.602979	0.615554	eukaryotic	eukaryotic
554065.E1ZLT1	3	1	1	1	1	7	1127790	1469607	0.646155	0.615554	eukaryotic	eukaryotic
554065.E1ZNV2	3	1	1	1	1	7	886929	1469607	0.642409	0.615554	eukaryotic	eukaryotic
554065.E1ZPD3	3	1	1	1	1	7	825291	1469607	0.571243	0.615554	eukaryotic	eukaryotic
556484.B5Y3I3	3	1	1	1	1	7	945027	945027	0.484421	0.476015	eukaryotic	eukaryotic
556484.B7FTY7	3	1	1	1	1	7	1360149	945027	0.485276	0.476015	eukaryotic	eukaryotic
556484.B7FUC3	3	1	1	1	1	7	1360149	945027	0.485276	0.476015	eukaryotic	eukaryotic
556484.B7FVX7	3	1	1	1	1	7	1098048	945027	0.480796	0.476015	eukaryotic	eukaryotic
556484.B7FY37	3	1	1	1	1	7	1029020	945027	0.468214	0.476015	eukaryotic	eukaryotic
556484.B7FZF0	3	1	1	1	1	7	1007774	945027	0.488048	0.476015	eukaryotic	eukaryotic
556484.B7G2T9	3	1	1	1	1	7	901854	945027	0.476191	0.476015	eukaryotic	eukaryotic
556484.B7G335	3	1	1	1	1	7	887525	945027	0.486987	0.476015	eukaryotic	eukaryotic
556484.B7G7I8	3	1	1	1	1	7	702472	945027	0.490027	0.476015	eukaryotic	eukaryotic
556484.B7G9I2	3	1	1	1	1	7	683012	945027	0.491344	0.476015	eukaryotic	eukaryotic
556484.B7GAS1	3	1	1	1	1	7	591337	945027	0.489097	0.476015	eukaryotic	eukaryotic
559292.P04786	3	1	1	1	1	7	1091292	924432	0.381602	0.384248	eukaryotic	eukaryotic
559292.P07342	3	1	1	1	1	7	924432	924432	0.382036	0.384248	eukaryotic	eukaryotic
559292.P07703	3	1	1	1	1	7	948067	924432	0.380644	0.384248	eukaryotic	eukaryotic
559292.P07807	3	1	1	1	1	7	1091292	924432	0.381602	0.384248	eukaryotic	eukaryotic
559292.P26637	3	1	1	1	1	7	948067	924432	0.380644	0.384248	eukaryotic	eukaryotic
559292.P29704	3	1	1	1	1	7	562644	924432	0.38495	0.384248	eukaryotic	eukaryotic
559292.P32783	3	1	1	1	1	7	813185	924432	0.38341	0.384248	eukaryotic	eukaryotic
559292.P38088	3	1	1	1	1	7	813185	924432	0.38341	0.384248	eukaryotic	eukaryotic
559292.P38174	3	1	1	1	1	7	813185	924432	0.38341	0.384248	eukaryotic	eukaryotic
559292.P38251	3	1	1	1	1	7	813185	924432	0.38341	0.384248	eukaryotic	eukaryotic
559292.P38629	3	1	1	1	1	7	784334	924432	0.386379	0.384248	eukaryotic	eukaryotic
559292.P38912	3	1	1	1	1	7	924432	924432	0.382036	0.384248	eukaryotic	eukaryotic
559292.P39102	3	1	1	1	1	7	1078178	924432	0.384763	0.384248	eukaryotic	eukaryotic
559292.P40348	3	1	1	1	1	7	745752	924432	0.383732	0.384248	eukaryotic	eukaryotic
559292.P48559	3	1	1	1	1	7	784334	924432	0.386379	0.384248	eukaryotic	eukaryotic
559292.P54113	3	1	1	1	1	7	1078178	924432	0.384763	0.384248	eukaryotic	eukaryotic
559292.Q02555	3	1	1	1	1	7	924432	924432	0.382036	0.384248	eukaryotic	eukaryotic
559292.Q03305	3	1	1	1	1	7	1531934	924432	0.379064	0.384248	eukaryotic	eukaryotic
559292.Q03656	3	1	1	1	1	7	924432	924432	0.382036	0.384248	eukaryotic	eukaryotic
559292.Q04740	3	1	1	1	1	7	924432	924432	0.382036	0.384248	eukaryotic	eukaryotic
559292.Q06817	3	1	1	1	1	7	948067	924432	0.380644	0.384248	eukaryotic	eukaryotic
559292.Q12122	3	1	1	1	1	7	1531934	924432	0.379064	0.384248	eukaryotic	eukaryotic
559515.M4B1N5	3	1	1	1	1	7	1234264	332403	0.451946	0.412633	eukaryotic	eukaryotic
559515.M4B3R2	3	1	1	1	1	7	1130321	332403	0.436015	0.412633	eukaryotic	eukaryotic
559515.M4B6E6	3	1	1	1	1	7	879809	332403	0.407407	0.412633	eukaryotic	eukaryotic
559515.M4BEX3	3	1	1	1	1	7	492607	332403	0.451007	0.412633	eukaryotic	eukaryotic
559515.M4BK75	3	1	1	1	1	7	394111	332403	0.403841	0.412633	eukaryotic	eukaryotic
559515.M4BMB2	3	1	1	1	1	7	353737	332403	0.472617	0.412633	eukaryotic	eukaryotic
559515.M4BMW9	3	1	1	1	1	7	348867	332403	0.418652	0.412633	eukaryotic	eukaryotic
559515.M4BPM0	3	1	1	1	1	7	300466	332403	0.35187	0.412633	eukaryotic	eukaryotic
559515.M4BQG7	3	1	1	1	1	7	282124	332403	0.328664	0.412633	eukaryotic	eukaryotic
559515.M4BR52	3	1	1	1	1	7	275321	332403	0.462969	0.412633	eukaryotic	eukaryotic
559515.M4BSB1	3	1	1	1	1	7	256058	332403	0.461103	0.412633	eukaryotic	eukaryotic
559515.M4BSZ3	3	1	1	1	1	7	234451	332403	0.381798	0.412633	eukaryotic	eukaryotic
564608.C1MGQ4	3	1	1	1	1	7	2211168	1183542	0.663291	0.667498	eukaryotic	eukaryotic
564608.C1MGX0	3	1	1	1	1	7	2211168	1183542	0.663291	0.667498	eukaryotic	eukaryotic
564608.C1MLH9	3	1	1	1	1	7	2171924	1183542	0.514326	0.667498	eukaryotic	eukaryotic
564608.C1MN45	3	1	1	1	1	7	1965374	1183542	0.671159	0.667498	eukaryotic	eukaryotic
564608.C1MNK7	3	1	1	1	1	7	1965374	1183542	0.671159	0.667498	eukaryotic	eukaryotic
564608.C1MPU2	3	1	1	1	1	7	1602727	1183542	0.667398	0.667498	eukaryotic	eukaryotic
564608.C1MQM6	3	1	1	1	1	7	1602727	1183542	0.667398	0.667498	eukaryotic	eukaryotic
564608.C1MSJ9	3	1	1	1	1	7	1532349	1183542	0.67336	0.667498	eukaryotic	eukaryotic
564608.C1MUV5	3	1	1	1	1	7	1224725	1183542	0.671556	0.667498	eukaryotic	eukaryotic
564608.C1MVX4	3	1	1	1	1	7	1183542	1183542	0.679187	0.667498	eukaryotic	eukaryotic
564608.C1MWI9	3	1	1	1	1	7	1183542	1183542	0.679187	0.667498	eukaryotic	eukaryotic
564608.C1MZ53	3	1	1	1	1	7	1106799	1183542	0.67081	0.667498	eukaryotic	eukaryotic
564608.C1N3Z9	3	1	1	1	1	7	950944	1183542	0.666093	0.667498	eukaryotic	eukaryotic
564608.C1N7B1	3	1	1	1	1	7	793362	1183542	0.667154	0.667498	eukaryotic	eukaryotic
564608.C1N813	3	1	1	1	1	7	777318	1183542	0.668307	0.667498	eukaryotic	eukaryotic
564608.C1N9E2	3	1	1	1	1	7	640896	1183542	0.674969	0.667498	eukaryotic	eukaryotic
5660.A4H4I2	3	1	1	1	1	7	512966	992962	0.599309	0.588704	eukaryotic	eukaryotic
5660.A4H6P1	3	1	1	1	1	7	558542	992962	0.573513	0.588704	eukaryotic	eukaryotic
5660.A4H8F0	3	1	1	1	1	7	688706	992962	0.591223	0.588704	eukaryotic	eukaryotic
5660.A4H9X6	3	1	1	1	1	7	733565	992962	0.5792	0.588704	eukaryotic	eukaryotic
5660.A4HA24	3	1	1	1	1	7	733565	992962	0.5792	0.588704	eukaryotic	eukaryotic
5660.A4HD69	3	1	1	1	1	7	829283	992962	0.586634	0.588704	eukaryotic	eukaryotic
5660.A4HEV3	3	1	1	1	1	7	992962	992962	0.580987	0.588704	eukaryotic	eukaryotic
5660.A4HF67	3	1	1	1	1	7	992962	992962	0.580987	0.588704	eukaryotic	eukaryotic
5660.A4HGB2	3	1	1	1	1	7	1159460	992962	0.572596	0.588704	eukaryotic	eukaryotic
5660.A4HIU4	3	1	1	1	1	7	1327199	992962	0.565929	0.588704	eukaryotic	eukaryotic
5660.A4HJT3	3	1	1	1	1	7	1550185	992962	0.573092	0.588704	eukaryotic	eukaryotic
5660.A4HLU3	3	1	1	1	1	7	1504365	992962	0.567778	0.588704	eukaryotic	eukaryotic
5660.A4HPQ1	3	1	1	1	1	7	2686644	992962	0.55907	0.588704	eukaryotic	eukaryotic
5660.A4HQF9	3	1	1	1	1	7	2686644	992962	0.55907	0.588704	eukaryotic	eukaryotic
5660.A4HQJ4	3	1	1	1	1	7	2686644	992962	0.55907	0.588704	eukaryotic	eukaryotic
5664.E9AD32	3	1	1	1	1	7	1130425	1091541	0.587982	0.599913	eukaryotic	eukaryotic
5664.Q4Q084	3	1	1	1	1	7	2682152	1091541	0.581334	0.599913	eukaryotic	eukaryotic
5664.Q4Q0B9	3	1	1	1	1	7	2682152	1091541	0.581334	0.599913	eukaryotic	eukaryotic
5664.Q4Q131	3	1	1	1	1	7	2682152	1091541	0.581334	0.599913	eukaryotic	eukaryotic
5664.Q4Q3V7	3	1	1	1	1	7	1583654	1091541	0.590675	0.599913	eukaryotic	eukaryotic
5664.Q4Q5W4	3	1	1	1	1	7	1484325	1091541	0.590307	0.599913	eukaryotic	eukaryotic
5664.Q4Q6T0	3	1	1	1	1	7	1403435	1091541	0.588134	0.599913	eukaryotic	eukaryotic
5664.Q4Q8J8	3	1	1	1	1	7	1160105	1091541	0.592202	0.599913	eukaryotic	eukaryotic
5664.Q4Q996	3	1	1	1	1	7	1091541	1091541	0.603923	0.599913	eukaryotic	eukaryotic
5664.Q4QAW9	3	1	1	1	1	7	840951	1091541	0.604111	0.599913	eukaryotic	eukaryotic
5664.Q4QDF5	3	1	1	1	1	7	702209	1091541	0.596411	0.599913	eukaryotic	eukaryotic
5664.Q4QDK2	3	1	1	1	1	7	702209	1091541	0.596411	0.599913	eukaryotic	eukaryotic
5664.Q4QEB3	3	1	1	1	1	7	684830	1091541	0.60855	0.599913	eukaryotic	eukaryotic
5664.Q4QEZ6	3	1	1	1	1	7	714652	1091541	0.610298	0.599913	eukaryotic	eukaryotic
5664.Q4QGW1	3	1	1	1	1	7	582574	1091541	0.59393	0.599913	eukaryotic	eukaryotic
5671.A4HSQ7	3	1	1	1	1	7	523353	1043849	0.619805	0.603989	eukaryotic	eukaryotic
5671.A4HWS3	3	1	1	1	1	7	698904	1043849	0.611493	0.603989	eukaryotic	eukaryotic
5671.A4HY87	3	1	1	1	1	7	742502	1043849	0.592311	0.603989	eukaryotic	eukaryotic
5671.A4I227	3	1	1	1	1	7	1050166	1043849	0.601852	0.603989	eukaryotic	eukaryotic
5671.A4I3E6	3	1	1	1	1	7	1163439	1043849	0.591692	0.603989	eukaryotic	eukaryotic
5671.A4I649	3	1	1	1	1	7	1365116	1043849	0.586924	0.603989	eukaryotic	eukaryotic
5671.A4I799	3	1	1	1	1	7	1468865	1043849	0.588757	0.603989	eukaryotic	eukaryotic
5671.A4IC95	3	1	1	1	1	7	2673957	1043849	0.580633	0.603989	eukaryotic	eukaryotic
5671.A4ID12	3	1	1	1	1	7	2673957	1043849	0.580633	0.603989	eukaryotic	eukaryotic
5671.E9AGS1	3	1	1	1	1	7	742502	1043849	0.592311	0.603989	eukaryotic	eukaryotic
5671.E9AH23	3	1	1	1	1	7	867076	1043849	0.603783	0.603989	eukaryotic	eukaryotic
5671.E9AHC5	3	1	1	1	1	7	1043849	1043849	0.593305	0.603989	eukaryotic	eukaryotic
5671.E9AHP8	3	1	1	1	1	7	1448149	1043849	0.586256	0.603989	eukaryotic	eukaryotic
5671.E9AI03	3	1	1	1	1	7	2673957	1043849	0.580633	0.603989	eukaryotic	eukaryotic
574566.I0YN51	3	1	1	1	1	7	1404325	1959570	0.520126	0.528679	eukaryotic	eukaryotic
574566.I0YPH9	3	1	1	1	1	7	1433447	1959570	0.52915	0.528679	eukaryotic	eukaryotic
574566.I0YV96	3	1	1	1	1	7	1910972	1959570	0.531253	0.528679	eukaryotic	eukaryotic
574566.I0Z0I8	3	1	1	1	1	7	2666268	1959570	0.52852	0.528679	eukaryotic	eukaryotic
574566.I0Z3R3	3	1	1	1	1	7	2986207	1959570	0.531877	0.528679	eukaryotic	eukaryotic
574566.I0Z569	3	1	1	1	1	7	3057697	1959570	0.533208	0.528679	eukaryotic	eukaryotic
574566.I0Z617	3	1	1	1	1	7	3057697	1959570	0.533208	0.528679	eukaryotic	eukaryotic
574566.I0Z8D1	3	1	1	1	1	7	3860700	1959570	0.533823	0.528679	eukaryotic	eukaryotic
5759.C4LSQ1	3	1	1	1	1	7	530630	48878	0.25357	0.225922	eukaryotic	eukaryotic
5759.C4LVH5	3	1	1	1	1	7	145105	48878	0.24884	0.225922	eukaryotic	eukaryotic
5759.C4LXL0	3	1	1	1	1	7	109510	48878	0.244398	0.225922	eukaryotic	eukaryotic
5759.C4LXY1	3	1	1	1	1	7	102656	48878	0.245373	0.225922	eukaryotic	eukaryotic
5759.C4LYB5	3	1	1	1	1	7	95968	48878	0.248531	0.225922	eukaryotic	eukaryotic
5759.C4LZ12	3	1	1	1	1	7	90684	48878	0.2544	0.225922	eukaryotic	eukaryotic
5759.C4LZ76	3	1	1	1	1	7	90490	48878	0.254128	0.225922	eukaryotic	eukaryotic
5759.C4M0L4	3	1	1	1	1	7	75050	48878	0.253511	0.225922	eukaryotic	eukaryotic
5759.C4M690	3	1	1	1	1	7	40009	48878	0.232123	0.225922	eukaryotic	eukaryotic
5759.C4M6P0	3	1	1	1	1	7	37540	48878	0.247096	0.225922	eukaryotic	eukaryotic
5759.C4M8Z1	3	1	1	1	1	7	24991	48878	0.248049	0.225922	eukaryotic	eukaryotic
5786.F0Z6B9	3	1	1	1	1	7	269155	66882	0.24198	0.241483	eukaryotic	eukaryotic
5786.F0Z714	3	1	1	1	1	7	226910	66882	0.247129	0.241483	eukaryotic	eukaryotic
5786.F0Z716	3	1	1	1	1	7	226910	66882	0.247129	0.241483	eukaryotic	eukaryotic
5786.F0Z7I0	3	1	1	1	1	7	199232	66882	0.239751	0.241483	eukaryotic	eukaryotic
5786.F0Z8C6	3	1	1	1	1	7	164048	66882	0.241515	0.241483	eukaryotic	eukaryotic
5786.F0ZA78	3	1	1	1	1	7	145159	66882	0.243195	0.241483	eukaryotic	eukaryotic
5786.F0ZAC7	3	1	1	1	1	7	144093	66882	0.256466	0.241483	eukaryotic	eukaryotic
5786.F0ZC49	3	1	1	1	1	7	127527	66882	0.2394	0.241483	eukaryotic	eukaryotic
5786.F0ZDD2	3	1	1	1	1	7	117155	66882	0.252571	0.241483	eukaryotic	eukaryotic
5786.F0ZH03	3	1	1	1	1	7	93055	66882	0.235678	0.241483	eukaryotic	eukaryotic
5786.F0ZI71	3	1	1	1	1	7	85444	66882	0.259925	0.241483	eukaryotic	eukaryotic
5786.F0ZL97	3	1	1	1	1	7	75105	66882	0.245323	0.241483	eukaryotic	eukaryotic
5786.F0ZN53	3	1	1	1	1	7	67807	66882	0.249458	0.241483	eukaryotic	eukaryotic
5786.F0ZP35	3	1	1	1	1	7	66239	66882	0.24161	0.241483	eukaryotic	eukaryotic
5786.F0ZRG2	3	1	1	1	1	7	57896	66882	0.259586	0.241483	eukaryotic	eukaryotic
5786.F0ZTJ7	3	1	1	1	1	7	50328	66882	0.247675	0.241483	eukaryotic	eukaryotic
5786.F0ZVK0	3	1	1	1	1	7	44392	66882	0.2541	0.241483	eukaryotic	eukaryotic
5786.F0ZVQ7	3	1	1	1	1	7	44174	66882	0.232626	0.241483	eukaryotic	eukaryotic
5786.F0ZXX1	3	1	1	1	1	7	35755	66882	0.23015	0.241483	eukaryotic	eukaryotic
5786.F0ZYD5	3	1	1	1	1	7	35090	66882	0.257652	0.241483	eukaryotic	eukaryotic
5823.A0A077XBB1	3	1	1	1	1	7	846621	1640194	0.21677	0.21986	eukaryotic	eukaryotic
5823.A0A077XBU2	3	1	1	1	1	7	1420538	1640194	0.217813	0.21986	eukaryotic	eukaryotic
5823.A0A077XDP6	3	1	1	1	1	7	1420538	1640194	0.217813	0.21986	eukaryotic	eukaryotic
5823.A0A077XIX3	3	1	1	1	1	7	1807263	1640194	0.219955	0.21986	eukaryotic	eukaryotic
5851.B3L0P1	3	1	1	1	1	7	1125183	2162604	0.396304	0.400645	eukaryotic	eukaryotic
5851.B3L418	3	1	1	1	1	7	1888041	2162604	0.388816	0.400645	eukaryotic	eukaryotic
5851.B3L428	3	1	1	1	1	7	1888041	2162604	0.388816	0.400645	eukaryotic	eukaryotic
5851.B3L4H5	3	1	1	1	1	7	1888041	2162604	0.388816	0.400645	eukaryotic	eukaryotic
5851.B3LBE8	3	1	1	1	1	7	1125183	2162604	0.396304	0.400645	eukaryotic	eukaryotic
5865.A7AMS6	3	1	1	1	1	7	2593321	1797578	0.417809	0.421224	eukaryotic	eukaryotic
5865.A7AN74	3	1	1	1	1	7	2593321	1797578	0.417809	0.421224	eukaryotic	eukaryotic
5865.A7AP36	3	1	1	1	1	7	2593321	1797578	0.417809	0.421224	eukaryotic	eukaryotic
5865.A7APS4	3	1	1	1	1	7	2593321	1797578	0.417809	0.421224	eukaryotic	eukaryotic
5865.A7AQ72	3	1	1	1	1	7	2593321	1797578	0.417809	0.421224	eukaryotic	eukaryotic
5865.A7ATE5	3	1	1	1	1	7	1729420	1797578	0.418004	0.421224	eukaryotic	eukaryotic
5865.A7AU63	3	1	1	1	1	7	1729420	1797578	0.418004	0.421224	eukaryotic	eukaryotic
5865.A7AUT4	3	1	1	1	1	7	1729420	1797578	0.418004	0.421224	eukaryotic	eukaryotic
5875.Q4N0F9	3	1	1	1	1	7	1317242	1971885	0.338727	0.339526	eukaryotic	eukaryotic
5875.Q4N1R0	3	1	1	1	1	7	1835835	1971885	0.339526	0.339526	eukaryotic	eukaryotic
5875.Q4N262	3	1	1	1	1	7	1835835	1971885	0.339526	0.339526	eukaryotic	eukaryotic
5875.Q4N473	3	1	1	1	1	7	1971885	1971885	0.343841	0.339526	eukaryotic	eukaryotic
5875.Q4N5Z1	3	1	1	1	1	7	1971885	1971885	0.343841	0.339526	eukaryotic	eukaryotic
5875.Q4N6V8	3	1	1	1	1	7	2540031	1971885	0.341645	0.339526	eukaryotic	eukaryotic
5875.Q4N742	3	1	1	1	1	7	2540031	1971885	0.341645	0.339526	eukaryotic	eukaryotic
588596.A0A2I1EDX7	3	1	1	1	1	7	271591	336374	0.253889	0.261569	eukaryotic	eukaryotic
588596.A0A2I1FZL6	3	1	1	1	1	7	497789	336374	0.248987	0.261569	eukaryotic	eukaryotic
588596.A0A2I1G1F0	3	1	1	1	1	7	332467	336374	0.269233	0.261569	eukaryotic	eukaryotic
588596.A0A2I1GEZ3	3	1	1	1	1	7	364863	336374	0.259952	0.261569	eukaryotic	eukaryotic
588596.A0A2I1GPB6	3	1	1	1	1	7	332449	336374	0.274716	0.261569	eukaryotic	eukaryotic
588596.A0A2I1GUE3	3	1	1	1	1	7	1375865	336374	0.258214	0.261569	eukaryotic	eukaryotic
5888.A0BCC8	3	1	1	1	1	7	685517	413287	0.277287	0.272059	eukaryotic	eukaryotic
5888.A0BKS8	3	1	1	1	1	7	297280	413287	0.281321	0.272059	eukaryotic	eukaryotic
5888.A0BLK8	3	1	1	1	1	7	293095	413287	0.282233	0.272059	eukaryotic	eukaryotic
5888.A0BXP7	3	1	1	1	1	7	261595	413287	0.283117	0.272059	eukaryotic	eukaryotic
5888.A0C2G3	3	1	1	1	1	7	245750	413287	0.292338	0.272059	eukaryotic	eukaryotic
5888.A0C3L7	3	1	1	1	1	7	242121	413287	0.293176	0.272059	eukaryotic	eukaryotic
5888.A0CRF7	3	1	1	1	1	7	554327	413287	0.273552	0.272059	eukaryotic	eukaryotic
5888.A0EGE6	3	1	1	1	1	7	330323	413287	0.289828	0.272059	eukaryotic	eukaryotic
5888.Q3SD81	3	1	1	1	1	7	437966	413287	0.280734	0.272059	eukaryotic	eukaryotic
5888.Q3SDS2	3	1	1	1	1	7	437966	413287	0.280734	0.272059	eukaryotic	eukaryotic
5949.A0A077ZRU3	3	1	1	1	1	7	10287	3291	0.307281	0.314222	eukaryotic	eukaryotic
5949.A0A077ZZS9	3	1	1	1	1	7	2314	3291	0.349179	0.314222	eukaryotic	eukaryotic
5949.A0A078ARI2	3	1	1	1	1	7	2880	3291	0.331944	0.314222	eukaryotic	eukaryotic
5963.A0A1R2B3Y7	3	1	1	1	1	7	34642	55106	0.294094	0.293894	eukaryotic	eukaryotic
5963.A0A1R2B8U1	3	1	1	1	1	7	32415	55106	0.299028	0.293894	eukaryotic	eukaryotic
5963.A0A1R2BC50	3	1	1	1	1	7	36531	55106	0.28844	0.293894	eukaryotic	eukaryotic
5963.A0A1R2BCN7	3	1	1	1	1	7	37339	55106	0.304293	0.293894	eukaryotic	eukaryotic
5963.A0A1R2BDP4	3	1	1	1	1	7	37922	55106	0.284109	0.293894	eukaryotic	eukaryotic
5963.A0A1R2BEP0	3	1	1	1	1	7	39517	55106	0.299517	0.293894	eukaryotic	eukaryotic
5963.A0A1R2BKG3	3	1	1	1	1	7	44493	55106	0.286225	0.293894	eukaryotic	eukaryotic
5963.A0A1R2BKI3	3	1	1	1	1	7	44493	55106	0.286225	0.293894	eukaryotic	eukaryotic
5963.A0A1R2BMA5	3	1	1	1	1	7	46291	55106	0.296148	0.293894	eukaryotic	eukaryotic
5963.A0A1R2BS08	3	1	1	1	1	7	51813	55106	0.289869	0.293894	eukaryotic	eukaryotic
5963.A0A1R2C1L1	3	1	1	1	1	7	66290	55106	0.289033	0.293894	eukaryotic	eukaryotic
5963.A0A1R2C4P2	3	1	1	1	1	7	68981	55106	0.29988	0.293894	eukaryotic	eukaryotic
5963.A0A1R2C502	3	1	1	1	1	7	69732	55106	0.281478	0.293894	eukaryotic	eukaryotic
5963.A0A1R2C5W8	3	1	1	1	1	7	70867	55106	0.302524	0.293894	eukaryotic	eukaryotic
5963.A0A1R2C8P2	3	1	1	1	1	7	77241	55106	0.294261	0.293894	eukaryotic	eukaryotic
5963.A0A1R2CI54	3	1	1	1	1	7	95944	55106	0.301311	0.293894	eukaryotic	eukaryotic
5963.A0A1R2CIU2	3	1	1	1	1	7	96817	55106	0.293316	0.293894	eukaryotic	eukaryotic
5963.A0A1R2CLA2	3	1	1	1	1	7	101609	55106	0.294246	0.293894	eukaryotic	eukaryotic
5963.A0A1R2CM89	3	1	1	1	1	7	105444	55106	0.29261	0.293894	eukaryotic	eukaryotic
5963.A0A1R2CN61	3	1	1	1	1	7	107386	55106	0.297804	0.293894	eukaryotic	eukaryotic
5963.A0A1R2CPD9	3	1	1	1	1	7	110075	55106	0.293273	0.293894	eukaryotic	eukaryotic
5963.A0A1R2CQU4	3	1	1	1	1	7	115029	55106	0.291744	0.293894	eukaryotic	eukaryotic
5963.A0A1R2CTF3	3	1	1	1	1	7	125681	55106	0.30205	0.293894	eukaryotic	eukaryotic
5963.A0A1R2CUQ1	3	1	1	1	1	7	130004	55106	0.290414	0.293894	eukaryotic	eukaryotic
5963.A0A1R2CWB9	3	1	1	1	1	7	139271	55106	0.304263	0.293894	eukaryotic	eukaryotic
5963.A0A1R2CWT5	3	1	1	1	1	7	141026	55106	0.2992	0.293894	eukaryotic	eukaryotic
5963.A0A1R2D0C5	3	1	1	1	1	7	161019	55106	0.302772	0.293894	eukaryotic	eukaryotic
5963.A0A1R2D144	3	1	1	1	1	7	164475	55106	0.297109	0.293894	eukaryotic	eukaryotic
5963.A0A1R2D438	3	1	1	1	1	7	200190	55106	0.28959	0.293894	eukaryotic	eukaryotic
59799.S9U4W4	3	1	1	1	1	7	166827	300799	0.485569	0.455452	eukaryotic	eukaryotic
59799.S9U6I3	3	1	1	1	1	7	512780	300799	0.47716	0.455452	eukaryotic	eukaryotic
59799.S9U767	3	1	1	1	1	7	165646	300799	0.486133	0.455452	eukaryotic	eukaryotic
59799.S9UCN5	3	1	1	1	1	7	547181	300799	0.50522	0.455452	eukaryotic	eukaryotic
59799.S9UIP8	3	1	1	1	1	7	178288	300799	0.461585	0.455452	eukaryotic	eukaryotic
59799.S9UN69	3	1	1	1	1	7	166827	300799	0.485569	0.455452	eukaryotic	eukaryotic
59799.S9UQZ5	3	1	1	1	1	7	551511	300799	0.440695	0.455452	eukaryotic	eukaryotic
59799.S9URG3	3	1	1	1	1	7	551511	300799	0.440695	0.455452	eukaryotic	eukaryotic
59799.S9URZ3	3	1	1	1	1	7	514622	300799	0.492218	0.455452	eukaryotic	eukaryotic
59799.S9UW02	3	1	1	1	1	7	178288	300799	0.461585	0.455452	eukaryotic	eukaryotic
59799.S9V1B1	3	1	1	1	1	7	357672	300799	0.448805	0.455452	eukaryotic	eukaryotic
59799.S9V3J4	3	1	1	1	1	7	352804	300799	0.474555	0.455452	eukaryotic	eukaryotic
59799.S9V4X7	3	1	1	1	1	7	265057	300799	0.437578	0.455452	eukaryotic	eukaryotic
59799.S9V9X2	3	1	1	1	1	7	512780	300799	0.47716	0.455452	eukaryotic	eukaryotic
59799.S9V9Y4	3	1	1	1	1	7	255631	300799	0.486721	0.455452	eukaryotic	eukaryotic
59799.S9VDE1	3	1	1	1	1	7	551511	300799	0.440695	0.455452	eukaryotic	eukaryotic
59799.S9VE13	3	1	1	1	1	7	300799	300799	0.424483	0.455452	eukaryotic	eukaryotic
59799.S9VEN7	3	1	1	1	1	7	551511	300799	0.440695	0.455452	eukaryotic	eukaryotic
59799.S9VFY8	3	1	1	1	1	7	361701	300799	0.49142	0.455452	eukaryotic	eukaryotic
59799.S9VGS9	3	1	1	1	1	7	265057	300799	0.437578	0.455452	eukaryotic	eukaryotic
59799.S9VK07	3	1	1	1	1	7	512780	300799	0.47716	0.455452	eukaryotic	eukaryotic
59799.S9VMP7	3	1	1	1	1	7	547181	300799	0.50522	0.455452	eukaryotic	eukaryotic
59799.S9W2Y0	3	1	1	1	1	7	178288	300799	0.461585	0.455452	eukaryotic	eukaryotic
59799.S9W7J5	3	1	1	1	1	7	357672	300799	0.448805	0.455452	eukaryotic	eukaryotic
59799.S9WGY8	3	1	1	1	1	7	265057	300799	0.437578	0.455452	eukaryotic	eukaryotic
59799.S9WPY1	3	1	1	1	1	7	265057	300799	0.437578	0.455452	eukaryotic	eukaryotic
6183.G4VQG5	3	1	1	1	1	7	59508270	32115377	0.347645	0.362342	eukaryotic	eukaryotic
6183.G4VQZ6	3	1	1	1	1	7	59508270	32115377	0.347645	0.362342	eukaryotic	eukaryotic
6183.G4VRN2	3	1	1	1	1	7	59508270	32115377	0.347645	0.362342	eukaryotic	eukaryotic
630390.A0A0C4ES66	3	1	1	1	1	7	917149	544257	0.362074	0.459053	eukaryotic	eukaryotic
630390.A0A180GT20	3	1	1	1	1	7	932488	544257	0.34102	0.459053	eukaryotic	eukaryotic
630390.A0A180H376	3	1	1	1	1	7	2670323	544257	0.331073	0.459053	eukaryotic	eukaryotic
635003.A0A1E7EU22	3	1	1	1	1	7	885466	1295604	0.39018	0.371755	eukaryotic	eukaryotic
635003.A0A1E7EW27	3	1	1	1	1	7	951086	1295604	0.390845	0.371755	eukaryotic	eukaryotic
635003.A0A1E7EYU2	3	1	1	1	1	7	1246619	1295604	0.34093	0.371755	eukaryotic	eukaryotic
635003.A0A1E7F5B4	3	1	1	1	1	7	2734636	1295604	0.382237	0.371755	eukaryotic	eukaryotic
635003.A0A1E7FA10	3	1	1	1	1	7	2651505	1295604	0.378548	0.371755	eukaryotic	eukaryotic
635003.A0A1E7FL88	3	1	1	1	1	7	3206982	1295604	0.380961	0.371755	eukaryotic	eukaryotic
645134.A0A0L0H9U3	3	1	1	1	1	7	964002	1465701	0.475122	0.473613	eukaryotic	eukaryotic
645134.A0A0L0HCE2	3	1	1	1	1	7	1011658	1465701	0.474105	0.473613	eukaryotic	eukaryotic
645134.A0A0L0HCF6	3	1	1	1	1	7	1011658	1465701	0.474105	0.473613	eukaryotic	eukaryotic
645134.A0A0L0HHT2	3	1	1	1	1	7	1465701	1465701	0.471211	0.473613	eukaryotic	eukaryotic
645134.A0A0L0HI00	3	1	1	1	1	7	1465701	1465701	0.471211	0.473613	eukaryotic	eukaryotic
645134.A0A0L0HI82	3	1	1	1	1	7	1496662	1465701	0.47586	0.473613	eukaryotic	eukaryotic
645134.A0A0L0HL43	3	1	1	1	1	7	1543597	1465701	0.470304	0.473613	eukaryotic	eukaryotic
645134.A0A0L0HLV7	3	1	1	1	1	7	1543597	1465701	0.470304	0.473613	eukaryotic	eukaryotic
645134.A0A0L0HR18	3	1	1	1	1	7	1895878	1465701	0.469176	0.473613	eukaryotic	eukaryotic
645134.A0A0L0HSW7	3	1	1	1	1	7	2242450	1465701	0.472852	0.473613	eukaryotic	eukaryotic
645134.A0A0L0HUU6	3	1	1	1	1	7	2242450	1465701	0.472852	0.473613	eukaryotic	eukaryotic
645134.A0A0L0HV39	3	1	1	1	1	7	2242450	1465701	0.472852	0.473613	eukaryotic	eukaryotic
6526.A0A2C9JKA8	3	1	1	1	1	7	1379390	48032	0.339753	0.362069	eukaryotic	eukaryotic
6526.A0A2C9JYH9	3	1	1	1	1	7	31849	48032	0.31169	0.362069	eukaryotic	eukaryotic
6526.A0A2C9K128	3	1	1	1	1	7	792866	48032	0.351811	0.362069	eukaryotic	eukaryotic
6526.A0A2C9KDZ4	3	1	1	1	1	7	530503	48032	0.347355	0.362069	eukaryotic	eukaryotic
6526.A0A2C9LR35	3	1	1	1	1	7	138533	48032	0.339702	0.362069	eukaryotic	eukaryotic
65357.A0A024FY55	3	1	1	1	1	7	441172	53190	0.432153	0.429268	eukaryotic	eukaryotic
65357.A0A024FZ48	3	1	1	1	1	7	441172	53190	0.432153	0.429268	eukaryotic	eukaryotic
65357.A0A024G2U4	3	1	1	1	1	7	87282	53190	0.435519	0.429268	eukaryotic	eukaryotic
65357.A0A024G3U4	3	1	1	1	1	7	79745	53190	0.438184	0.429268	eukaryotic	eukaryotic
65357.A0A024G400	3	1	1	1	1	7	53190	53190	0.435646	0.429268	eukaryotic	eukaryotic
65357.A0A024G5Q0	3	1	1	1	1	7	34653	53190	0.420166	0.429268	eukaryotic	eukaryotic
65357.A0A024G7A8	3	1	1	1	1	7	112464	53190	0.436815	0.429268	eukaryotic	eukaryotic
65357.A0A024G836	3	1	1	1	1	7	160450	53190	0.437308	0.429268	eukaryotic	eukaryotic
65357.A0A024GCF7	3	1	1	1	1	7	249328	53190	0.436662	0.429268	eukaryotic	eukaryotic
65357.A0A024GE48	3	1	1	1	1	7	147436	53190	0.437186	0.429268	eukaryotic	eukaryotic
65357.A0A024GKU4	3	1	1	1	1	7	63463	53190	0.426422	0.429268	eukaryotic	eukaryotic
65357.A0A024GN11	3	1	1	1	1	7	118571	53190	0.436852	0.429268	eukaryotic	eukaryotic
65357.A0A024GR41	3	1	1	1	1	7	34112	53190	0.464353	0.429268	eukaryotic	eukaryotic
6669.E9FSV8	3	1	1	1	1	7	3740170	642090	0.416915	0.327517	eukaryotic	eukaryotic
6669.E9FTA0	3	1	1	1	1	7	3740170	642090	0.416915	0.327517	eukaryotic	eukaryotic
6669.E9FV00	3	1	1	1	1	7	3777635	642090	0.394006	0.327517	eukaryotic	eukaryotic
6669.E9G1P5	3	1	1	1	1	7	2324447	642090	0.396878	0.327517	eukaryotic	eukaryotic
6669.E9G957	3	1	1	1	1	7	1912768	642090	0.379515	0.327517	eukaryotic	eukaryotic
6669.E9GAU3	3	1	1	1	1	7	1740525	642090	0.389428	0.327517	eukaryotic	eukaryotic
6669.E9GAU4	3	1	1	1	1	7	1740525	642090	0.389428	0.327517	eukaryotic	eukaryotic
6669.E9GM57	3	1	1	1	1	7	1199124	642090	0.364299	0.327517	eukaryotic	eukaryotic
6669.E9GWA2	3	1	1	1	1	7	945890	642090	0.360573	0.327517	eukaryotic	eukaryotic
6669.E9H1C7	3	1	1	1	1	7	749150	642090	0.414623	0.327517	eukaryotic	eukaryotic
6669.E9HFI1	3	1	1	1	1	7	379567	642090	0.328477	0.327517	eukaryotic	eukaryotic
669202.A0A0C2MTT5	3	1	1	1	1	7	416304	149757	0.272025	0.289975	eukaryotic	eukaryotic
669202.A0A0C2MUI2	3	1	1	1	1	7	446644	149757	0.29669	0.289975	eukaryotic	eukaryotic
670386.D3AVT5	3	1	1	1	1	7	1995970	1505627	0.322942	0.319711	eukaryotic	eukaryotic
670386.D3AVX3	3	1	1	1	1	7	1995970	1505627	0.322942	0.319711	eukaryotic	eukaryotic
670386.D3AWZ0	3	1	1	1	1	7	1995970	1505627	0.322942	0.319711	eukaryotic	eukaryotic
670386.D3AYL6	3	1	1	1	1	7	1301414	1505627	0.323769	0.319711	eukaryotic	eukaryotic
670386.D3B015	3	1	1	1	1	7	3242544	1505627	0.322888	0.319711	eukaryotic	eukaryotic
670386.D3B5U0	3	1	1	1	1	7	1319730	1505627	0.31827	0.319711	eukaryotic	eukaryotic
670386.D3B6S2	3	1	1	1	1	7	1319730	1505627	0.31827	0.319711	eukaryotic	eukaryotic
670386.D3B7L4	3	1	1	1	1	7	1029410	1505627	0.327841	0.319711	eukaryotic	eukaryotic
670386.D3B9Y0	3	1	1	1	1	7	1458136	1505627	0.320277	0.319711	eukaryotic	eukaryotic
670386.D3BAH9	3	1	1	1	1	7	1458136	1505627	0.320277	0.319711	eukaryotic	eukaryotic
670386.D3BAW6	3	1	1	1	1	7	1458136	1505627	0.320277	0.319711	eukaryotic	eukaryotic
670386.D3BIX6	3	1	1	1	1	7	2270873	1505627	0.316313	0.319711	eukaryotic	eukaryotic
670386.D3BK44	3	1	1	1	1	7	2264992	1505627	0.326934	0.319711	eukaryotic	eukaryotic
670386.D3BMB8	3	1	1	1	1	7	1641146	1505627	0.322515	0.319711	eukaryotic	eukaryotic
670386.D3BTE5	3	1	1	1	1	7	1052163	1505627	0.322945	0.319711	eukaryotic	eukaryotic
670386.D3BUL3	3	1	1	1	1	7	801171	1505627	0.318567	0.319711	eukaryotic	eukaryotic
67593.G4YIS5	3	1	1	1	1	7	13391544	7609243	0.518557	0.52462	eukaryotic	eukaryotic
67593.G4YK41	3	1	1	1	1	7	13391544	7609243	0.518557	0.52462	eukaryotic	eukaryotic
67593.G4YMA1	3	1	1	1	1	7	13391544	7609243	0.518557	0.52462	eukaryotic	eukaryotic
67593.G4YNQ4	3	1	1	1	1	7	13391544	7609243	0.518557	0.52462	eukaryotic	eukaryotic
67593.G4YQB6	3	1	1	1	1	7	13391544	7609243	0.518557	0.52462	eukaryotic	eukaryotic
67593.G4YSW5	3	1	1	1	1	7	11587143	7609243	0.537121	0.52462	eukaryotic	eukaryotic
67593.G4YTS4	3	1	1	1	1	7	11587143	7609243	0.537121	0.52462	eukaryotic	eukaryotic
67593.G4YYD3	3	1	1	1	1	7	11587143	7609243	0.537121	0.52462	eukaryotic	eukaryotic
67593.G4Z4S7	3	1	1	1	1	7	10773377	7609243	0.542621	0.52462	eukaryotic	eukaryotic
67593.G4Z535	3	1	1	1	1	7	10773377	7609243	0.542621	0.52462	eukaryotic	eukaryotic
67593.G4ZAN7	3	1	1	1	1	7	10773377	7609243	0.542621	0.52462	eukaryotic	eukaryotic
67593.G4ZHU5	3	1	1	1	1	7	7609243	7609243	0.544564	0.52462	eukaryotic	eukaryotic
67593.G4ZQI8	3	1	1	1	1	7	6830281	7609243	0.512171	0.52462	eukaryotic	eukaryotic
684364.F4NS72	3	1	1	1	1	7	4429271	1484463	0.395918	0.372222	eukaryotic	eukaryotic
684364.F4NSP1	3	1	1	1	1	7	4429271	1484463	0.395918	0.372222	eukaryotic	eukaryotic
684364.F4NTI1	3	1	1	1	1	7	4429271	1484463	0.395918	0.372222	eukaryotic	eukaryotic
684364.F4NUZ3	3	1	1	1	1	7	4429271	1484463	0.395918	0.372222	eukaryotic	eukaryotic
684364.F4NV69	3	1	1	1	1	7	4429271	1484463	0.395918	0.372222	eukaryotic	eukaryotic
684364.F4NVI2	3	1	1	1	1	7	4429271	1484463	0.395918	0.372222	eukaryotic	eukaryotic
684364.F4NWH3	3	1	1	1	1	7	1838335	1484463	0.39462	0.372222	eukaryotic	eukaryotic
684364.F4NXP9	3	1	1	1	1	7	1702825	1484463	0.394631	0.372222	eukaryotic	eukaryotic
684364.F4NXQ0	3	1	1	1	1	7	1702825	1484463	0.394631	0.372222	eukaryotic	eukaryotic
684364.F4NXQ1	3	1	1	1	1	7	1702825	1484463	0.394631	0.372222	eukaryotic	eukaryotic
684364.F4NXQ2	3	1	1	1	1	7	1702825	1484463	0.394631	0.372222	eukaryotic	eukaryotic
684364.F4NXQ3	3	1	1	1	1	7	1702825	1484463	0.394631	0.372222	eukaryotic	eukaryotic
684364.F4P479	3	1	1	1	1	7	1315425	1484463	0.392785	0.372222	eukaryotic	eukaryotic
684364.F4P4H2	3	1	1	1	1	7	1315425	1484463	0.392785	0.372222	eukaryotic	eukaryotic
684364.F4P5D9	3	1	1	1	1	7	1275358	1484463	0.383869	0.372222	eukaryotic	eukaryotic
684364.F4P6C5	3	1	1	1	1	7	1275358	1484463	0.383869	0.372222	eukaryotic	eukaryotic
684364.F4P804	3	1	1	1	1	7	989605	1484463	0.392575	0.372222	eukaryotic	eukaryotic
684364.F4PA85	3	1	1	1	1	7	776106	1484463	0.382943	0.372222	eukaryotic	eukaryotic
684364.F4PB57	3	1	1	1	1	7	748539	1484463	0.392367	0.372222	eukaryotic	eukaryotic
69293.G3N9F5	3	1	1	1	1	7	2768795	3715222	0.418013	0.455483	eukaryotic	eukaryotic
69293.G3ND06	3	1	1	1	1	7	2468427	3715222	0.402688	0.455483	eukaryotic	eukaryotic
69293.G3NDK4	3	1	1	1	1	7	3244493	3715222	0.444568	0.455483	eukaryotic	eukaryotic
69293.G3NHU8	3	1	1	1	1	7	3206613	3715222	0.450709	0.455483	eukaryotic	eukaryotic
69293.G3NNV8	3	1	1	1	1	7	4332527	3715222	0.456773	0.455483	eukaryotic	eukaryotic
69293.G3NQ07	3	1	1	1	1	7	13088565	3715222	0.428281	0.455483	eukaryotic	eukaryotic
69293.G3NVB8	3	1	1	1	1	7	2905847	3715222	0.440009	0.455483	eukaryotic	eukaryotic
69293.G3NXT5	3	1	1	1	1	7	5665658	3715222	0.438321	0.455483	eukaryotic	eukaryotic
69293.G3NZK7	3	1	1	1	1	7	13007998	3715222	0.4309	0.455483	eukaryotic	eukaryotic
69293.G3P2G6	3	1	1	1	1	7	16277087	3715222	0.43688	0.455483	eukaryotic	eukaryotic
69293.G3P4C8	3	1	1	1	1	7	4750846	3715222	0.428232	0.455483	eukaryotic	eukaryotic
69293.G3P765	3	1	1	1	1	7	4876221	3715222	0.433911	0.455483	eukaryotic	eukaryotic
69293.G3PEI4	3	1	1	1	1	7	3144827	3715222	0.447446	0.455483	eukaryotic	eukaryotic
69293.G3PKF1	3	1	1	1	1	7	3647865	3715222	0.445685	0.455483	eukaryotic	eukaryotic
69293.G3PKK8	3	1	1	1	1	7	3206613	3715222	0.450709	0.455483	eukaryotic	eukaryotic
69293.G3PQW2	3	1	1	1	1	7	7344347	3715222	0.421834	0.455483	eukaryotic	eukaryotic
69293.G3PSJ9	3	1	1	1	1	7	8507173	3715222	0.440941	0.455483	eukaryotic	eukaryotic
69293.G3PX02	3	1	1	1	1	7	4409105	3715222	0.443231	0.455483	eukaryotic	eukaryotic
69293.G3Q851	3	1	1	1	1	7	7797527	3715222	0.434374	0.455483	eukaryotic	eukaryotic
69293.G3QBX9	3	1	1	1	1	7	5980402	3715222	0.434417	0.455483	eukaryotic	eukaryotic
6945.B7PGP8	3	1	1	1	1	7	1727434	517317	0.483117	0.461111	eukaryotic	eukaryotic
6945.B7Q7U8	3	1	1	1	1	7	2996912	517317	0.456077	0.461111	eukaryotic	eukaryotic
6945.B7Q8V6	3	1	1	1	1	7	2072222	517317	0.466889	0.461111	eukaryotic	eukaryotic
695850.A0A067BXV5	3	1	1	1	1	7	179817	280943	0.584633	0.566238	eukaryotic	eukaryotic
695850.A0A067C0T9	3	1	1	1	1	7	210837	280943	0.571252	0.566238	eukaryotic	eukaryotic
695850.A0A067C0W4	3	1	1	1	1	7	242777	280943	0.54015	0.566238	eukaryotic	eukaryotic
695850.A0A067C731	3	1	1	1	1	7	335643	280943	0.580006	0.566238	eukaryotic	eukaryotic
695850.A0A067CEC7	3	1	1	1	1	7	505869	280943	0.562697	0.566238	eukaryotic	eukaryotic
695850.A0A067CGC3	3	1	1	1	1	7	471064	280943	0.557007	0.566238	eukaryotic	eukaryotic
695850.A0A067CID4	3	1	1	1	1	7	335643	280943	0.580006	0.566238	eukaryotic	eukaryotic
695850.A0A067CJ98	3	1	1	1	1	7	346585	280943	0.577916	0.566238	eukaryotic	eukaryotic
695850.A0A067CNE3	3	1	1	1	1	7	429762	280943	0.548913	0.566238	eukaryotic	eukaryotic
695850.A0A067CP25	3	1	1	1	1	7	463320	280943	0.575604	0.566238	eukaryotic	eukaryotic
695850.A0A067CPP8	3	1	1	1	1	7	505869	280943	0.562697	0.566238	eukaryotic	eukaryotic
695850.A0A067CRZ2	3	1	1	1	1	7	1129685	280943	0.583252	0.566238	eukaryotic	eukaryotic
695850.A0A067CT86	3	1	1	1	1	7	605349	280943	0.57842	0.566238	eukaryotic	eukaryotic
695850.A0A067CU37	3	1	1	1	1	7	1275007	280943	0.581914	0.566238	eukaryotic	eukaryotic
695850.A0A067CWS1	3	1	1	1	1	7	1567650	280943	0.585912	0.566238	eukaryotic	eukaryotic
695850.A0A067CXZ7	3	1	1	1	1	7	1615556	280943	0.564846	0.566238	eukaryotic	eukaryotic
695850.A0A067D1R2	3	1	1	1	1	7	1615556	280943	0.564846	0.566238	eukaryotic	eukaryotic
695850.A0A067D304	3	1	1	1	1	7	1129685	280943	0.583252	0.566238	eukaryotic	eukaryotic
695850.A0A067D4Y0	3	1	1	1	1	7	1275007	280943	0.581914	0.566238	eukaryotic	eukaryotic
70448.A0A090M2Y2	3	1	1	1	1	7	770247	770247	0.594198	0.597572	eukaryotic	eukaryotic
70448.A0A090M340	3	1	1	1	1	7	997349	770247	0.592409	0.597572	eukaryotic	eukaryotic
70448.A0A090M4E5	3	1	1	1	1	7	944949	770247	0.594128	0.597572	eukaryotic	eukaryotic
70448.A0A090M6L8	3	1	1	1	1	7	542658	770247	0.59579	0.597572	eukaryotic	eukaryotic
70448.A0A090MCW7	3	1	1	1	1	7	542658	770247	0.59579	0.597572	eukaryotic	eukaryotic
70448.A0A090N3V6	3	1	1	1	1	7	770247	770247	0.594198	0.597572	eukaryotic	eukaryotic
70448.A0A096P8T9	3	1	1	1	1	7	528282	770247	0.596295	0.597572	eukaryotic	eukaryotic
70448.Q00XV7	3	1	1	1	1	7	542658	770247	0.59579	0.597572	eukaryotic	eukaryotic
70448.Q011U8	3	1	1	1	1	7	713055	770247	0.601202	0.597572	eukaryotic	eukaryotic
70448.Q014T3	3	1	1	1	1	7	770247	770247	0.594198	0.597572	eukaryotic	eukaryotic
70448.Q01BU2	3	1	1	1	1	7	997349	770247	0.592409	0.597572	eukaryotic	eukaryotic
70448.Q01F45	3	1	1	1	1	7	1074073	770247	0.549435	0.597572	eukaryotic	eukaryotic
70448.Q01FZ4	3	1	1	1	1	7	1096038	770247	0.595083	0.597572	eukaryotic	eukaryotic
70779.XP_015752242.1	3	1	1	1	1	7	1205828	483560	0.339134	0.331256	eukaryotic	eukaryotic
70779.XP_015752831.1	3	1	1	1	1	7	2364663	483560	0.344526	0.331256	eukaryotic	eukaryotic
70779.XP_015757198.1	3	1	1	1	1	7	846694	483560	0.328874	0.331256	eukaryotic	eukaryotic
70779.XP_015764319.1	3	1	1	1	1	7	568131	483560	0.307917	0.331256	eukaryotic	eukaryotic
70779.XP_015764320.1	3	1	1	1	1	7	568131	483560	0.307917	0.331256	eukaryotic	eukaryotic
70779.XP_015764470.1	3	1	1	1	1	7	565986	483560	0.351376	0.331256	eukaryotic	eukaryotic
70779.XP_015766472.1	3	1	1	1	1	7	508744	483560	0.336368	0.331256	eukaryotic	eukaryotic
70779.XP_015771279.1	3	1	1	1	1	7	1538719	483560	0.344226	0.331256	eukaryotic	eukaryotic
70779.XP_015774598.1	3	1	1	1	1	7	307158	483560	0.334483	0.331256	eukaryotic	eukaryotic
70779.XP_015776689.1	3	1	1	1	1	7	248907	483560	0.322345	0.331256	eukaryotic	eukaryotic
7159.Q17B50	3	1	1	1	1	7	310827023	310827023	0.386367	0.380934	eukaryotic	eukaryotic
7159.Q17E87	3	1	1	1	1	7	409777671	310827023	0.381349	0.380934	eukaryotic	eukaryotic
7227.P17719	3	1	1	1	1	7	32079332	25286937	0.425558	0.369447	eukaryotic	eukaryotic
7227.P30189	3	1	1	1	1	7	23542272	25286937	0.423434	0.369447	eukaryotic	eukaryotic
7227.Q7K4C7	3	1	1	1	1	7	28110228	25286937	0.414447	0.369447	eukaryotic	eukaryotic
7227.Q7KMI3	3	1	1	1	1	7	25286937	25286937	0.425983	0.369447	eukaryotic	eukaryotic
7227.Q7KRY6	3	1	1	1	1	7	32079332	25286937	0.425558	0.369447	eukaryotic	eukaryotic
7227.Q8IRR5	3	1	1	1	1	7	23542272	25286937	0.423434	0.369447	eukaryotic	eukaryotic
7227.Q9NHX0	3	1	1	1	1	7	28110228	25286937	0.414447	0.369447	eukaryotic	eukaryotic
7227.Q9VEA1	3	1	1	1	1	7	32079332	25286937	0.425558	0.369447	eukaryotic	eukaryotic
7227.Q9VG74	3	1	1	1	1	7	32079332	25286937	0.425558	0.369447	eukaryotic	eukaryotic
7227.Q9VKW3	3	1	1	1	1	7	23513713	25286937	0.417816	0.369447	eukaryotic	eukaryotic
7227.Q9VL89	3	1	1	1	1	7	23513713	25286937	0.417816	0.369447	eukaryotic	eukaryotic
7227.Q9VQR8	3	1	1	1	1	7	23513713	25286937	0.417816	0.369447	eukaryotic	eukaryotic
7227.Q9VW40	3	1	1	1	1	7	28110228	25286937	0.414447	0.369447	eukaryotic	eukaryotic
7227.Q9VY27	3	1	1	1	1	7	23542272	25286937	0.423434	0.369447	eukaryotic	eukaryotic
7227.Q9W0D9	3	1	1	1	1	7	28110228	25286937	0.414447	0.369447	eukaryotic	eukaryotic
7227.Q9W2P2	3	1	1	1	1	7	25286937	25286937	0.425983	0.369447	eukaryotic	eukaryotic
7227.Q9W2S1	3	1	1	1	1	7	23542272	25286937	0.423434	0.369447	eukaryotic	eukaryotic
7227.Q9W2W5	3	1	1	1	1	7	23542272	25286937	0.423434	0.369447	eukaryotic	eukaryotic
7227.Q9W5E1	3	1	1	1	1	7	23542272	25286937	0.423434	0.369447	eukaryotic	eukaryotic
7460.A0A087ZPC7	3	1	1	1	1	7	11514235	13619446	0.331981	0.233563	eukaryotic	eukaryotic
7460.A0A087ZQ35	3	1	1	1	1	7	13896942	13619446	0.33398	0.233563	eukaryotic	eukaryotic
7460.A0A087ZRD5	3	1	1	1	1	7	13896942	13619446	0.33398	0.233563	eukaryotic	eukaryotic
7460.A0A088A1M3	3	1	1	1	1	7	16352601	13619446	0.300496	0.233563	eukaryotic	eukaryotic
7460.A0A088A5Z0	3	1	1	1	1	7	13896942	13619446	0.33398	0.233563	eukaryotic	eukaryotic
7460.A0A088AA86	3	1	1	1	1	7	11514235	13619446	0.331981	0.233563	eukaryotic	eukaryotic
7460.A0A088AEC6	3	1	1	1	1	7	16089513	13619446	0.342974	0.233563	eukaryotic	eukaryotic
7460.A0A088AGM3	3	1	1	1	1	7	13619446	13619446	0.328172	0.233563	eukaryotic	eukaryotic
7460.A0A088AH35	3	1	1	1	1	7	16089513	13619446	0.342974	0.233563	eukaryotic	eukaryotic
7460.A0A088AKI9	3	1	1	1	1	7	11514235	13619446	0.331981	0.233563	eukaryotic	eukaryotic
75058.A0A0S4IL53	3	1	1	1	1	7	22900	31877	0.507686	0.50466	eukaryotic	eukaryotic
75058.A0A0S4IMC2	3	1	1	1	1	7	31314	31877	0.51766	0.50466	eukaryotic	eukaryotic
75058.A0A0S4IYI3	3	1	1	1	1	7	128367	31877	0.512515	0.50466	eukaryotic	eukaryotic
75058.A0A0S4J3R5	3	1	1	1	1	7	16613	31877	0.439836	0.50466	eukaryotic	eukaryotic
75058.A0A0S4JGB9	3	1	1	1	1	7	53183	31877	0.494745	0.50466	eukaryotic	eukaryotic
75058.A0A0S4JJA5	3	1	1	1	1	7	37978	31877	0.516115	0.50466	eukaryotic	eukaryotic
75058.A0A0S4JKS1	3	1	1	1	1	7	61323	31877	0.516315	0.50466	eukaryotic	eukaryotic
75058.A0A0S4JRM8	3	1	1	1	1	7	72549	31877	0.498325	0.50466	eukaryotic	eukaryotic
7668.W4XEQ8	3	1	1	1	1	7	34141701	37282240	0.377283	0.395107	eukaryotic	eukaryotic
7668.W4XGV2	3	1	1	1	1	7	33637616	37282240	0.374436	0.395107	eukaryotic	eukaryotic
7668.W4XM36	3	1	1	1	1	7	33320445	37282240	0.373829	0.395107	eukaryotic	eukaryotic
7668.W4YGA4	3	1	1	1	1	7	30021121	37282240	0.374743	0.395107	eukaryotic	eukaryotic
7668.W4YRK3	3	1	1	1	1	7	33742550	37282240	0.375381	0.395107	eukaryotic	eukaryotic
7668.W4Z0S7	3	1	1	1	1	7	37767047	37282240	0.3733	0.395107	eukaryotic	eukaryotic
7668.W4ZC71	3	1	1	1	1	7	33742550	37282240	0.375381	0.395107	eukaryotic	eukaryotic
7668.W4ZDG3	3	1	1	1	1	7	42589792	37282240	0.3746	0.395107	eukaryotic	eukaryotic
7719.A0A1W3JM58	3	1	1	1	1	7	7758926	5152902	0.344017	0.353583	eukaryotic	eukaryotic
7719.F6RJT7	3	1	1	1	1	7	4880876	5152902	0.345642	0.353583	eukaryotic	eukaryotic
7719.F6S6E8	3	1	1	1	1	7	6398796	5152902	0.349898	0.353583	eukaryotic	eukaryotic
7719.F6TIJ2	3	1	1	1	1	7	6125210	5152902	0.346248	0.353583	eukaryotic	eukaryotic
7719.F6WAW7	3	1	1	1	1	7	6586238	5152902	0.356482	0.353583	eukaryotic	eukaryotic
7719.F6WQ28	3	1	1	1	1	7	6703990	5152902	0.344054	0.353583	eukaryotic	eukaryotic
7719.F6YSX7	3	1	1	1	1	7	5356125	5152902	0.346608	0.353583	eukaryotic	eukaryotic
7719.H2Y1K5	3	1	1	1	1	7	4880876	5152902	0.345642	0.353583	eukaryotic	eukaryotic
7719.H2Y320	3	1	1	1	1	7	10041006	5152902	0.341368	0.353583	eukaryotic	eukaryotic
7739.C3XRA4	3	1	1	1	1	7	9188264	2586728	0.380067	0.377925	eukaryotic	eukaryotic
7739.C3XXL0	3	1	1	1	1	7	10574653	2586728	0.390239	0.377925	eukaryotic	eukaryotic
7739.C3XZ03	3	1	1	1	1	7	3793777	2586728	0.40378	0.377925	eukaryotic	eukaryotic
7739.C3YCU3	3	1	1	1	1	7	2594003	2586728	0.383669	0.377925	eukaryotic	eukaryotic
7739.C3YD53	3	1	1	1	1	7	2812389	2586728	0.394233	0.377925	eukaryotic	eukaryotic
7739.C3YDA2	3	1	1	1	1	7	2812389	2586728	0.394233	0.377925	eukaryotic	eukaryotic
7739.C3YDK8	3	1	1	1	1	7	2812389	2586728	0.394233	0.377925	eukaryotic	eukaryotic
7739.C3YIV4	3	1	1	1	1	7	2190870	2586728	0.383221	0.377925	eukaryotic	eukaryotic
7739.C3Z3J6	3	1	1	1	1	7	1869022	2586728	0.372747	0.377925	eukaryotic	eukaryotic
7739.C3ZBE1	3	1	1	1	1	7	7063231	2586728	0.39699	0.377925	eukaryotic	eukaryotic
7739.C3ZIB1	3	1	1	1	1	7	2026018	2586728	0.396413	0.377925	eukaryotic	eukaryotic
7757.S4R628	3	1	1	1	1	7	14191316	12997951	0.491022	0.497683	eukaryotic	eukaryotic
7757.S4R856	3	1	1	1	1	7	11442861	12997951	0.492757	0.497683	eukaryotic	eukaryotic
7757.S4RKY8	3	1	1	1	1	7	25627752	12997951	0.467468	0.497683	eukaryotic	eukaryotic
7757.S4RL70	3	1	1	1	1	7	19176401	12997951	0.460816	0.497683	eukaryotic	eukaryotic
7757.S4RT68	3	1	1	1	1	7	14098333	12997951	0.429973	0.497683	eukaryotic	eukaryotic
7757.S4RU75	3	1	1	1	1	7	13170390	12997951	0.484802	0.497683	eukaryotic	eukaryotic
7868.XP_007887710.1	3	1	1	1	1	7	11530729	4521922	0.394301	0.466998	eukaryotic	eukaryotic
7868.XP_007888351.1	3	1	1	1	1	7	9996152	4521922	0.384289	0.466998	eukaryotic	eukaryotic
7868.XP_007891645.1	3	1	1	1	1	7	7318917	4521922	0.397015	0.466998	eukaryotic	eukaryotic
7868.XP_007893635.1	3	1	1	1	1	7	18507835	4521922	0.393088	0.466998	eukaryotic	eukaryotic
7868.XP_007896445.1	3	1	1	1	1	7	4508737	4521922	0.416601	0.466998	eukaryotic	eukaryotic
7868.XP_007896446.1	3	1	1	1	1	7	4508737	4521922	0.416601	0.466998	eukaryotic	eukaryotic
7868.XP_007900040.1	3	1	1	1	1	7	3471745	4521922	0.432016	0.466998	eukaryotic	eukaryotic
7868.XP_007900198.1	3	1	1	1	1	7	3337818	4521922	0.421849	0.466998	eukaryotic	eukaryotic
7897.H2ZRJ6	3	1	1	1	1	7	655809	924514	0.368886	0.377801	eukaryotic	eukaryotic
7897.H3AHK2	3	1	1	1	1	7	514809	924514	0.285576	0.377801	eukaryotic	eukaryotic
7897.H3AL98	3	1	1	1	1	7	782691	924514	0.323343	0.377801	eukaryotic	eukaryotic
7897.H3BFM4	3	1	1	1	1	7	2964192	924514	0.329517	0.377801	eukaryotic	eukaryotic
7955.A0A0G2L5X9	3	1	1	1	1	7	37502052	52186028	0.365234	0.362888	eukaryotic	eukaryotic
7955.A0A0R4II71	3	1	1	1	1	7	59578283	52186028	0.363555	0.362888	eukaryotic	eukaryotic
7955.A0A2R8Q9N2	3	1	1	1	1	7	37502052	52186028	0.365234	0.362888	eukaryotic	eukaryotic
7955.A0A2R8QK46	3	1	1	1	1	7	37502052	52186028	0.365234	0.362888	eukaryotic	eukaryotic
7955.A0A2R8QLM7	3	1	1	1	1	7	37502052	52186028	0.365234	0.362888	eukaryotic	eukaryotic
7955.A0A2R8QPR3	3	1	1	1	1	7	46223585	52186028	0.366755	0.362888	eukaryotic	eukaryotic
7955.A2ATX1	3	1	1	1	1	7	52186028	52186028	0.364071	0.362888	eukaryotic	eukaryotic
7955.A2BGN0	3	1	1	1	1	7	72500377	52186028	0.363573	0.362888	eukaryotic	eukaryotic
7955.A5WVX8	3	1	1	1	1	7	78093716	52186028	0.365705	0.362888	eukaryotic	eukaryotic
7955.F1QHM6	3	1	1	1	1	7	60270060	52186028	0.363674	0.362888	eukaryotic	eukaryotic
7955.F1REN8	3	1	1	1	1	7	45484838	52186028	0.362994	0.362888	eukaryotic	eukaryotic
7955.Q503C5	3	1	1	1	1	7	46223585	52186028	0.366755	0.362888	eukaryotic	eukaryotic
8030.A0A1S3KM59	3	1	1	1	1	7	116138522	63420197	0.413113	0.423729	eukaryotic	eukaryotic
8030.A0A1S3KML6	3	1	1	1	1	7	116138522	63420197	0.413113	0.423729	eukaryotic	eukaryotic
8030.A0A1S3KPC7	3	1	1	1	1	7	116138522	63420197	0.413113	0.423729	eukaryotic	eukaryotic
8030.A0A1S3KW36	3	1	1	1	1	7	93888509	63420197	0.393242	0.423729	eukaryotic	eukaryotic
8030.A0A1S3KXC9	3	1	1	1	1	7	93888509	63420197	0.393242	0.423729	eukaryotic	eukaryotic
8030.A0A1S3LA49	3	1	1	1	1	7	91880963	63420197	0.394307	0.423729	eukaryotic	eukaryotic
8030.A0A1S3LEV7	3	1	1	1	1	7	91880963	63420197	0.394307	0.423729	eukaryotic	eukaryotic
8030.A0A1S3LI32	3	1	1	1	1	7	107758823	63420197	0.41171	0.423729	eukaryotic	eukaryotic
8030.A0A1S3LJM0	3	1	1	1	1	7	103963437	63420197	0.400338	0.423729	eukaryotic	eukaryotic
8030.A0A1S3LM95	3	1	1	1	1	7	107758823	63420197	0.41171	0.423729	eukaryotic	eukaryotic
8030.A0A1S3LW87	3	1	1	1	1	7	92503429	63420197	0.392742	0.423729	eukaryotic	eukaryotic
8030.A0A1S3M6Q7	3	1	1	1	1	7	93901824	63420197	0.401791	0.423729	eukaryotic	eukaryotic
8030.A0A1S3MB72	3	1	1	1	1	7	103963437	63420197	0.400338	0.423729	eukaryotic	eukaryotic
8030.A0A1S3MCW7	3	1	1	1	1	7	103963437	63420197	0.400338	0.423729	eukaryotic	eukaryotic
8030.A0A1S3ME44	3	1	1	1	1	7	103963437	63420197	0.400338	0.423729	eukaryotic	eukaryotic
8030.A0A1S3MHG8	3	1	1	1	1	7	159038750	63420197	0.408878	0.423729	eukaryotic	eukaryotic
8030.A0A1S3MI01	3	1	1	1	1	7	103963437	63420197	0.400338	0.423729	eukaryotic	eukaryotic
8030.A0A1S3MIB7	3	1	1	1	1	7	103963437	63420197	0.400338	0.423729	eukaryotic	eukaryotic
8030.A0A1S3MKI1	3	1	1	1	1	7	87796323	63420197	0.400101	0.423729	eukaryotic	eukaryotic
8030.A0A1S3MMJ3	3	1	1	1	1	7	87796323	63420197	0.400101	0.423729	eukaryotic	eukaryotic
8030.A0A1S3MQY3	3	1	1	1	1	7	87796323	63420197	0.400101	0.423729	eukaryotic	eukaryotic
8030.A0A1S3MXA3	3	1	1	1	1	7	87796323	63420197	0.400101	0.423729	eukaryotic	eukaryotic
8030.A0A1S3N1H2	3	1	1	1	1	7	58785266	63420197	0.399936	0.423729	eukaryotic	eukaryotic
8030.A0A1S3N445	3	1	1	1	1	7	72943712	63420197	0.385416	0.423729	eukaryotic	eukaryotic
8030.A0A1S3NB89	3	1	1	1	1	7	80503877	63420197	0.387984	0.423729	eukaryotic	eukaryotic
8030.A0A1S3NJ59	3	1	1	1	1	7	82978133	63420197	0.404349	0.423729	eukaryotic	eukaryotic
8030.A0A1S3NJP1	3	1	1	1	1	7	82978133	63420197	0.404349	0.423729	eukaryotic	eukaryotic
8030.A0A1S3NQN1	3	1	1	1	1	7	159038750	63420197	0.408878	0.423729	eukaryotic	eukaryotic
8030.A0A1S3NS76	3	1	1	1	1	7	141712164	63420197	0.399639	0.423729	eukaryotic	eukaryotic
8030.A0A1S3P1E8	3	1	1	1	1	7	63420197	63420197	0.41235	0.423729	eukaryotic	eukaryotic
8030.A0A1S3P339	3	1	1	1	1	7	63420197	63420197	0.41235	0.423729	eukaryotic	eukaryotic
8030.A0A1S3PGG3	3	1	1	1	1	7	48650977	63420197	0.411361	0.423729	eukaryotic	eukaryotic
8030.A0A1S3QAN8	3	1	1	1	1	7	42488239	63420197	0.3899	0.423729	eukaryotic	eukaryotic
8030.A0A1S3R160	3	1	1	1	1	7	92503429	63420197	0.392742	0.423729	eukaryotic	eukaryotic
8030.A0A1S3RM47	3	1	1	1	1	7	82398024	63420197	0.402989	0.423729	eukaryotic	eukaryotic
8030.A0A1S3RXN6	3	1	1	1	1	7	80503877	63420197	0.387984	0.423729	eukaryotic	eukaryotic
8030.A0A1S3S979	3	1	1	1	1	7	87043188	63420197	0.386274	0.423729	eukaryotic	eukaryotic
8030.A0A1S3SAW3	3	1	1	1	1	7	87043188	63420197	0.386274	0.423729	eukaryotic	eukaryotic
8030.A0A1S3SBG4	3	1	1	1	1	7	87043188	63420197	0.386274	0.423729	eukaryotic	eukaryotic
8030.A0A1S3SHF6	3	1	1	1	1	7	58785266	63420197	0.399936	0.423729	eukaryotic	eukaryotic
8030.A0A1S3SZL9	3	1	1	1	1	7	141712164	63420197	0.399639	0.423729	eukaryotic	eukaryotic
8030.A0A1S3T0Z4	3	1	1	1	1	7	141712164	63420197	0.399639	0.423729	eukaryotic	eukaryotic
8030.B5X2R0	3	1	1	1	1	7	87796323	63420197	0.400101	0.423729	eukaryotic	eukaryotic
8030.B5X4L7	3	1	1	1	1	7	92503429	63420197	0.392742	0.423729	eukaryotic	eukaryotic
8030.B5X850	3	1	1	1	1	7	141712164	63420197	0.399639	0.423729	eukaryotic	eukaryotic
8030.B5XC46	3	1	1	1	1	7	103963437	63420197	0.400338	0.423729	eukaryotic	eukaryotic
8030.B5XGM4	3	1	1	1	1	7	86795998	63420197	0.406777	0.423729	eukaryotic	eukaryotic
8030.C0H904	3	1	1	1	1	7	87043188	63420197	0.386274	0.423729	eukaryotic	eukaryotic
8030.C0H907	3	1	1	1	1	7	107758823	63420197	0.41171	0.423729	eukaryotic	eukaryotic
81824.A9UPA4	3	1	1	1	1	7	3607472	1073602	0.530251	0.499274	eukaryotic	eukaryotic
81824.A9URB2	3	1	1	1	1	7	2609235	1073602	0.53368	0.499274	eukaryotic	eukaryotic
81824.A9UVV1	3	1	1	1	1	7	1473070	1073602	0.529209	0.499274	eukaryotic	eukaryotic
81824.A9UW56	3	1	1	1	1	7	1473070	1073602	0.529209	0.499274	eukaryotic	eukaryotic
81824.A9UX55	3	1	1	1	1	7	1435907	1073602	0.533072	0.499274	eukaryotic	eukaryotic
81824.A9UY99	3	1	1	1	1	7	1300516	1073602	0.529504	0.499274	eukaryotic	eukaryotic
81824.A9UYL6	3	1	1	1	1	7	1303535	1073602	0.528932	0.499274	eukaryotic	eukaryotic
81824.A9V103	3	1	1	1	1	7	1128437	1073602	0.529477	0.499274	eukaryotic	eukaryotic
81824.A9V116	3	1	1	1	1	7	1128437	1073602	0.529477	0.499274	eukaryotic	eukaryotic
81824.A9V2J4	3	1	1	1	1	7	1073602	1073602	0.517497	0.499274	eukaryotic	eukaryotic
81824.A9VAE5	3	1	1	1	1	7	547533	1073602	0.515563	0.499274	eukaryotic	eukaryotic
8355.A0A1L8ENR0	3	1	1	1	1	7	104563342	136570857	0.359073	0.400252	eukaryotic	eukaryotic
8355.A0A1L8EVK9	3	1	1	1	1	7	104563342	136570857	0.359073	0.400252	eukaryotic	eukaryotic
8355.A0A1L8F1W3	3	1	1	1	1	7	98932711	136570857	0.344406	0.400252	eukaryotic	eukaryotic
8355.A0A1L8FF23	3	1	1	1	1	7	89646545	136570857	0.346273	0.400252	eukaryotic	eukaryotic
8355.A0A1L8FFK7	3	1	1	1	1	7	89646545	136570857	0.346273	0.400252	eukaryotic	eukaryotic
8355.A0A1L8FYD5	3	1	1	1	1	7	155008754	136570857	0.343952	0.400252	eukaryotic	eukaryotic
8355.A0A1L8G5S0	3	1	1	1	1	7	136570857	136570857	0.341607	0.400252	eukaryotic	eukaryotic
8355.A0A1L8GGS6	3	1	1	1	1	7	121245978	136570857	0.350151	0.400252	eukaryotic	eukaryotic
8355.A0A1L8GH15	3	1	1	1	1	7	144084681	136570857	0.350307	0.400252	eukaryotic	eukaryotic
8355.A0A1L8GSY2	3	1	1	1	1	7	120483114	136570857	0.344641	0.400252	eukaryotic	eukaryotic
8355.A0A1L8GZQ0	3	1	1	1	1	7	144167371	136570857	0.34591	0.400252	eukaryotic	eukaryotic
8355.A0A1L8H6T0	3	1	1	1	1	7	159726491	136570857	0.344049	0.400252	eukaryotic	eukaryotic
8355.A0A1L8HBC0	3	1	1	1	1	7	159726491	136570857	0.344049	0.400252	eukaryotic	eukaryotic
8355.A0A1L8HZX8	3	1	1	1	1	7	219802469	136570857	0.34439	0.400252	eukaryotic	eukaryotic
8355.A0A1L8I0I4	3	1	1	1	1	7	219802469	136570857	0.34439	0.400252	eukaryotic	eukaryotic
8355.Q7ZTM5	3	1	1	1	1	7	219802469	136570857	0.34439	0.400252	eukaryotic	eukaryotic
8400.A0A2G9NSP7	3	1	1	1	1	7	193109	39344	0.394016	0.434515	eukaryotic	eukaryotic
8400.A0A2G9S1U5	3	1	1	1	1	7	33570	39344	0.320822	0.434515	eukaryotic	eukaryotic
8400.A0A2G9S6J1	3	1	1	1	1	7	168527	39344	0.382675	0.434515	eukaryotic	eukaryotic
8400.A0A2G9S924	3	1	1	1	1	7	213168	39344	0.394323	0.434515	eukaryotic	eukaryotic
8400.A0A2G9SD09	3	1	1	1	1	7	271589	39344	0.392726	0.434515	eukaryotic	eukaryotic
8400.A0A2G9SLN6	3	1	1	1	1	7	124565	39344	0.374086	0.434515	eukaryotic	eukaryotic
8469.M7AVJ1	3	1	1	1	1	7	2640616	3864109	0.44639	0.438914	eukaryotic	eukaryotic
8469.M7B3B1	3	1	1	1	1	7	4341340	3864109	0.459881	0.438914	eukaryotic	eukaryotic
8469.M7CL37	3	1	1	1	1	7	2774226	3864109	0.438438	0.438914	eukaryotic	eukaryotic
8469.M7CL73	3	1	1	1	1	7	3012582	3864109	0.395094	0.438914	eukaryotic	eukaryotic
8496.A0A151M684	3	1	1	1	1	7	28009590	18600683	0.42697	0.489716	eukaryotic	eukaryotic
8496.A0A151MHQ6	3	1	1	1	1	7	13057017	18600683	0.422909	0.489716	eukaryotic	eukaryotic
8496.A0A151P8T2	3	1	1	1	1	7	18600683	18600683	0.424459	0.489716	eukaryotic	eukaryotic
857967.G0QJM8	3	1	1	1	1	7	50583	64046	0.180495	0.150912	eukaryotic	eukaryotic
857967.G0QL85	3	1	1	1	1	7	42268	64046	0.164403	0.150912	eukaryotic	eukaryotic
857967.G0QS49	3	1	1	1	1	7	84718	64046	0.169704	0.150912	eukaryotic	eukaryotic
857967.G0R2Z6	3	1	1	1	1	7	66636	64046	0.152815	0.150912	eukaryotic	eukaryotic
857967.G0R4Z9	3	1	1	1	1	7	75392	64046	0.151913	0.150912	eukaryotic	eukaryotic
8665.V8P3E6	3	1	1	1	1	7	214387	241520	0.358114	0.430782	eukaryotic	eukaryotic
8665.V8P7H6	3	1	1	1	1	7	283265	241520	0.360966	0.430782	eukaryotic	eukaryotic
8665.V8PC68	3	1	1	1	1	7	465205	241520	0.351697	0.430782	eukaryotic	eukaryotic
8665.V8PC98	3	1	1	1	1	7	757284	241520	0.442842	0.430782	eukaryotic	eukaryotic
8665.V8PEB1	3	1	1	1	1	7	863726	241520	0.327196	0.430782	eukaryotic	eukaryotic
88036.D8QNN7	3	1	1	1	1	7	2902291	1749880	0.440857	0.445923	eukaryotic	eukaryotic
88036.D8QQU8	3	1	1	1	1	7	6951973	1749880	0.453132	0.445923	eukaryotic	eukaryotic
88036.D8QWE5	3	1	1	1	1	7	4340500	1749880	0.452907	0.445923	eukaryotic	eukaryotic
88036.D8QY44	3	1	1	1	1	7	4340500	1749880	0.452907	0.445923	eukaryotic	eukaryotic
88036.D8R029	3	1	1	1	1	7	4143897	1749880	0.454115	0.445923	eukaryotic	eukaryotic
88036.D8R4P3	3	1	1	1	1	7	3967201	1749880	0.446591	0.445923	eukaryotic	eukaryotic
88036.D8R956	3	1	1	1	1	7	3149478	1749880	0.448908	0.445923	eukaryotic	eukaryotic
88036.D8RFX9	3	1	1	1	1	7	2863690	1749880	0.443483	0.445923	eukaryotic	eukaryotic
88036.D8RGY2	3	1	1	1	1	7	2757671	1749880	0.451215	0.445923	eukaryotic	eukaryotic
88036.D8RKF5	3	1	1	1	1	7	2450373	1749880	0.443494	0.445923	eukaryotic	eukaryotic
88036.D8RMJ3	3	1	1	1	1	7	2302611	1749880	0.459386	0.445923	eukaryotic	eukaryotic
88036.D8RU79	3	1	1	1	1	7	2002061	1749880	0.454631	0.445923	eukaryotic	eukaryotic
88036.D8RYU7	3	1	1	1	1	7	1905290	1749880	0.439669	0.445923	eukaryotic	eukaryotic
88036.D8S5J2	3	1	1	1	1	7	1705931	1749880	0.446525	0.445923	eukaryotic	eukaryotic
88036.D8S5X0	3	1	1	1	1	7	1151165	1749880	0.446019	0.445923	eukaryotic	eukaryotic
88036.D8SBQ1	3	1	1	1	1	7	1506776	1749880	0.441755	0.445923	eukaryotic	eukaryotic
88036.D8SJZ4	3	1	1	1	1	7	1266796	1749880	0.44968	0.445923	eukaryotic	eukaryotic
88036.D8SLW9	3	1	1	1	1	7	1161767	1749880	0.454359	0.445923	eukaryotic	eukaryotic
88036.D8SMV8	3	1	1	1	1	7	1151165	1749880	0.446019	0.445923	eukaryotic	eukaryotic
88036.D8SMX1	3	1	1	1	1	7	1151165	1749880	0.446019	0.445923	eukaryotic	eukaryotic
88036.D8SN98	3	1	1	1	1	7	1143872	1749880	0.443071	0.445923	eukaryotic	eukaryotic
88036.D8SPD3	3	1	1	1	1	7	1098470	1749880	0.452553	0.445923	eukaryotic	eukaryotic
9258.F6SFB6	3	1	1	1	1	7	52889407	83338044	0.456521	0.501444	eukaryotic	eukaryotic
9258.F6V7S1	3	1	1	1	1	7	42294643	83338044	0.465144	0.501444	eukaryotic	eukaryotic
9258.F7DSI7	3	1	1	1	1	7	186506017	83338044	0.447493	0.501444	eukaryotic	eukaryotic
9258.F7F587	3	1	1	1	1	7	83338044	83338044	0.46011	0.501444	eukaryotic	eukaryotic
9258.F7G4I1	3	1	1	1	1	7	186506017	83338044	0.447493	0.501444	eukaryotic	eukaryotic
9305.G3VFQ7	3	1	1	1	1	7	2940082	1847107	0.331222	0.341692	eukaryotic	eukaryotic
9305.G3W2K4	3	1	1	1	1	7	2126928	1847107	0.347855	0.341692	eukaryotic	eukaryotic
9305.G3W3I0	3	1	1	1	1	7	935702	1847107	0.430262	0.341692	eukaryotic	eukaryotic
9305.G3W687	3	1	1	1	1	7	1951365	1847107	0.335711	0.341692	eukaryotic	eukaryotic
9305.G3W6H2	3	1	1	1	1	7	3210767	1847107	0.35124	0.341692	eukaryotic	eukaryotic
9305.G3WK76	3	1	1	1	1	7	3056329	1847107	0.379037	0.341692	eukaryotic	eukaryotic
9305.G3WNK0	3	1	1	1	1	7	3458917	1847107	0.366601	0.341692	eukaryotic	eukaryotic
946362.F2TZR4	3	1	1	1	1	7	2355805	1519554	0.538419	0.539397	eukaryotic	eukaryotic
946362.F2U1N5	3	1	1	1	1	7	2236390	1519554	0.540385	0.539397	eukaryotic	eukaryotic
946362.F2U1R1	3	1	1	1	1	7	2236390	1519554	0.540385	0.539397	eukaryotic	eukaryotic
946362.F2U4N2	3	1	1	1	1	7	2024179	1519554	0.509051	0.539397	eukaryotic	eukaryotic
946362.F2U554	3	1	1	1	1	7	2024179	1519554	0.509051	0.539397	eukaryotic	eukaryotic
946362.F2U6L8	3	1	1	1	1	7	1890125	1519554	0.534663	0.539397	eukaryotic	eukaryotic
946362.F2UC11	3	1	1	1	1	7	1475473	1519554	0.536627	0.539397	eukaryotic	eukaryotic
946362.F2UC17	3	1	1	1	1	7	1475473	1519554	0.536627	0.539397	eukaryotic	eukaryotic
946362.F2UCY9	3	1	1	1	1	7	1519554	1519554	0.50915	0.539397	eukaryotic	eukaryotic
946362.F2UEV4	3	1	1	1	1	7	1373940	1519554	0.52757	0.539397	eukaryotic	eukaryotic
946362.F2UF87	3	1	1	1	1	7	1373940	1519554	0.52757	0.539397	eukaryotic	eukaryotic
946362.F2UFI5	3	1	1	1	1	7	1385451	1519554	0.506985	0.539397	eukaryotic	eukaryotic
946362.F2UG46	3	1	1	1	1	7	1385451	1519554	0.506985	0.539397	eukaryotic	eukaryotic
946362.F2UIP5	3	1	1	1	1	7	1285528	1519554	0.500097	0.539397	eukaryotic	eukaryotic
946362.F2UL67	3	1	1	1	1	7	896822	1519554	0.534095	0.539397	eukaryotic	eukaryotic
946362.F2ULW0	3	1	1	1	1	7	927412	1519554	0.519724	0.539397	eukaryotic	eukaryotic
9544.A0A1D5Q0A5	3	1	1	1	1	7	130043857	145679321	0.393411	0.397456	eukaryotic	eukaryotic
9544.A0A1D5Q1V9	3	1	1	1	1	7	133066087	145679321	0.404324	0.397456	eukaryotic	eukaryotic
9544.A0A1D5Q4I9	3	1	1	1	1	7	223616943	145679321	0.415592	0.397456	eukaryotic	eukaryotic
9544.A0A1D5QNS7	3	1	1	1	1	7	133066087	145679321	0.404324	0.397456	eukaryotic	eukaryotic
9544.A0A1D5QNT4	3	1	1	1	1	7	133066087	145679321	0.404324	0.397456	eukaryotic	eukaryotic
9544.A0A1D5QP63	3	1	1	1	1	7	108737131	145679321	0.407085	0.397456	eukaryotic	eukaryotic
9544.A0A1D5QUP6	3	1	1	1	1	7	169963041	145679321	0.393643	0.397456	eukaryotic	eukaryotic
9544.A0A1D5QYJ8	3	1	1	1	1	7	145679321	145679321	0.395685	0.397456	eukaryotic	eukaryotic
9544.A0A1D5R0A7	3	1	1	1	1	7	133066087	145679321	0.404324	0.397456	eukaryotic	eukaryotic
9544.A0A1D5R689	3	1	1	1	1	7	77137496	145679321	0.44138	0.397456	eukaryotic	eukaryotic
9544.A0A1D5R708	3	1	1	1	1	7	113283605	145679321	0.405817	0.397456	eukaryotic	eukaryotic
9544.A0A1D5RAZ4	3	1	1	1	1	7	134124167	145679321	0.409974	0.397456	eukaryotic	eukaryotic
9544.A0A1D5RCC8	3	1	1	1	1	7	153388925	145679321	0.39271	0.397456	eukaryotic	eukaryotic
9544.A0A1D5RDQ4	3	1	1	1	1	7	108737131	145679321	0.407085	0.397456	eukaryotic	eukaryotic
9544.A0A1D5REG1	3	1	1	1	1	7	99517759	145679321	0.440395	0.397456	eukaryotic	eukaryotic
9544.A0A1D5RI74	3	1	1	1	1	7	79627065	145679321	0.446845	0.397456	eukaryotic	eukaryotic
9544.A0A1D5RJ13	3	1	1	1	1	7	79627065	145679321	0.446845	0.397456	eukaryotic	eukaryotic
9544.F6QR66	3	1	1	1	1	7	130043857	145679321	0.393411	0.397456	eukaryotic	eukaryotic
9544.F6S9R5	3	1	1	1	1	7	196197965	145679321	0.394638	0.397456	eukaryotic	eukaryotic
9544.F6SLP5	3	1	1	1	1	7	153388925	145679321	0.39271	0.397456	eukaryotic	eukaryotic
9544.F6SNN4	3	1	1	1	1	7	145679321	145679321	0.395685	0.397456	eukaryotic	eukaryotic
9544.F6U741	3	1	1	1	1	7	145679321	145679321	0.395685	0.397456	eukaryotic	eukaryotic
9544.F6UTD9	3	1	1	1	1	7	145679321	145679321	0.395685	0.397456	eukaryotic	eukaryotic
9544.F6VKE8	3	1	1	1	1	7	179085567	145679321	0.393249	0.397456	eukaryotic	eukaryotic
9544.F6WNQ8	3	1	1	1	1	7	99517759	145679321	0.440395	0.397456	eukaryotic	eukaryotic
9544.F6YE11	3	1	1	1	1	7	134124167	145679321	0.409974	0.397456	eukaryotic	eukaryotic
9544.F7CE03	3	1	1	1	1	7	108737131	145679321	0.407085	0.397456	eukaryotic	eukaryotic
9544.F7CI98	3	1	1	1	1	7	223616943	145679321	0.415592	0.397456	eukaryotic	eukaryotic
9544.F7D7T3	3	1	1	1	1	7	74474044	145679321	0.39369	0.397456	eukaryotic	eukaryotic
9544.F7DSK4	3	1	1	1	1	7	196197965	145679321	0.394638	0.397456	eukaryotic	eukaryotic
9544.F7DWK4	3	1	1	1	1	7	133066087	145679321	0.404324	0.397456	eukaryotic	eukaryotic
9544.F7F549	3	1	1	1	1	7	169868565	145679321	0.411961	0.397456	eukaryotic	eukaryotic
9544.F7FLX2	3	1	1	1	1	7	145679321	145679321	0.395685	0.397456	eukaryotic	eukaryotic
9544.F7GLN9	3	1	1	1	1	7	77137496	145679321	0.44138	0.397456	eukaryotic	eukaryotic
9544.F7GM05	3	1	1	1	1	7	79627065	145679321	0.446845	0.397456	eukaryotic	eukaryotic
9544.F7GQN8	3	1	1	1	1	7	134124167	145679321	0.409974	0.397456	eukaryotic	eukaryotic
9544.F7GU13	3	1	1	1	1	7	196197965	145679321	0.394638	0.397456	eukaryotic	eukaryotic
9544.F7H191	3	1	1	1	1	7	134124167	145679321	0.409974	0.397456	eukaryotic	eukaryotic
9544.F7HK25	3	1	1	1	1	7	145679321	145679321	0.395685	0.397456	eukaryotic	eukaryotic
9544.G7MP92	3	1	1	1	1	7	169963041	145679321	0.393643	0.397456	eukaryotic	eukaryotic
9544.G7MPF0	3	1	1	1	1	7	169963041	145679321	0.393643	0.397456	eukaryotic	eukaryotic
9544.H9FZ51	3	1	1	1	1	7	99517759	145679321	0.440395	0.397456	eukaryotic	eukaryotic
9598.A0A2I3RC86	3	1	1	1	1	7	108022954	130995917	0.40592	0.356014	eukaryotic	eukaryotic
9598.A0A2I3RNY4	3	1	1	1	1	7	196562557	130995917	0.395002	0.356014	eukaryotic	eukaryotic
9598.A0A2I3SYQ0	3	1	1	1	1	7	110513672	130995917	0.412567	0.356014	eukaryotic	eukaryotic
9598.A0A2I3SYT4	3	1	1	1	1	7	159319379	130995917	0.394061	0.356014	eukaryotic	eukaryotic
9598.A0A2I3SZS6	3	1	1	1	1	7	168369392	130995917	0.395321	0.356014	eukaryotic	eukaryotic
9598.A0A2I3T725	3	1	1	1	1	7	108022954	130995917	0.40592	0.356014	eukaryotic	eukaryotic
9598.A0A2I3T9X0	3	1	1	1	1	7	130995917	130995917	0.406349	0.356014	eukaryotic	eukaryotic
9598.A0A2I3TD84	3	1	1	1	1	7	143338811	130995917	0.398713	0.356014	eukaryotic	eukaryotic
9598.A0A2I3TMK0	3	1	1	1	1	7	143338811	130995917	0.398713	0.356014	eukaryotic	eukaryotic
9598.A0A2I3TTD5	3	1	1	1	1	7	128755406	130995917	0.394216	0.356014	eukaryotic	eukaryotic
9598.A0A2I3TX04	3	1	1	1	1	7	196562557	130995917	0.395002	0.356014	eukaryotic	eukaryotic
9598.A0A2J8LG06	3	1	1	1	1	7	143338811	130995917	0.398713	0.356014	eukaryotic	eukaryotic
9598.A0A2J8PA11	3	1	1	1	1	7	196562557	130995917	0.395002	0.356014	eukaryotic	eukaryotic
9598.H2PY11	3	1	1	1	1	7	224244400	130995917	0.411944	0.356014	eukaryotic	eukaryotic
9598.H2Q1V1	3	1	1	1	1	7	129809614	130995917	0.412225	0.356014	eukaryotic	eukaryotic
9598.H2Q692	3	1	1	1	1	7	130995917	130995917	0.406349	0.356014	eukaryotic	eukaryotic
9598.H2Q6U0	3	1	1	1	1	7	130995917	130995917	0.406349	0.356014	eukaryotic	eukaryotic
9598.H2Q706	3	1	1	1	1	7	130995917	130995917	0.406349	0.356014	eukaryotic	eukaryotic
9598.H2QDK6	3	1	1	1	1	7	76554116	130995917	0.451914	0.356014	eukaryotic	eukaryotic
9598.H2QSY7	3	1	1	1	1	7	168369392	130995917	0.395321	0.356014	eukaryotic	eukaryotic
9598.H2QXJ8	3	1	1	1	1	7	110513672	130995917	0.412567	0.356014	eukaryotic	eukaryotic
9598.H2R1J6	3	1	1	1	1	7	76554116	130995917	0.451914	0.356014	eukaryotic	eukaryotic
9598.H2R4V3	3	1	1	1	1	7	156046544	130995917	0.401305	0.356014	eukaryotic	eukaryotic
9598.H2R6V8	3	1	1	1	1	7	74774470	130995917	0.395098	0.356014	eukaryotic	eukaryotic
9598.K7AI72	3	1	1	1	1	7	151576177	130995917	0.382989	0.356014	eukaryotic	eukaryotic
9598.K7BL74	3	1	1	1	1	7	196562557	130995917	0.395002	0.356014	eukaryotic	eukaryotic
9598.K7CKY3	3	1	1	1	1	7	129809614	130995917	0.412225	0.356014	eukaryotic	eukaryotic
9606.C9J2C7	3	1	1	1	1	7	242193530	145138637	0.399553	0.413763	eukaryotic	eukaryotic
9606.O00219	3	1	1	1	1	7	90338346	145138637	0.403735	0.413763	eukaryotic	eukaryotic
9606.O14602	3	1	1	1	1	7	248956423	145138637	0.386279	0.413763	eukaryotic	eukaryotic
9606.O15160	3	1	1	1	1	7	170805980	145138637	0.394366	0.413763	eukaryotic	eukaryotic
9606.O43148	3	1	1	1	1	7	80373286	145138637	0.396352	0.413763	eukaryotic	eukaryotic
9606.O75072	3	1	1	1	1	7	138394718	145138637	0.36324	0.413763	eukaryotic	eukaryotic
9606.O75414	3	1	1	1	1	7	198295560	145138637	0.396266	0.413763	eukaryotic	eukaryotic
9606.P00374	3	1	1	1	1	7	80373286	145138637	0.396352	0.413763	eukaryotic	eukaryotic
9606.P35249	3	1	1	1	1	7	198295560	145138637	0.396266	0.413763	eukaryotic	eukaryotic
9606.P42898	3	1	1	1	1	7	248956423	145138637	0.386279	0.413763	eukaryotic	eukaryotic
9606.P49585	3	1	1	1	1	7	198295560	145138637	0.396266	0.413763	eukaryotic	eukaryotic
9606.P56597	3	1	1	1	1	7	181538260	145138637	0.394469	0.413763	eukaryotic	eukaryotic
9606.Q13630	3	1	1	1	1	7	145138637	145138637	0.400541	0.413763	eukaryotic	eukaryotic
9606.Q53S08	3	1	1	1	1	7	242193530	145138637	0.399553	0.413763	eukaryotic	eukaryotic
9606.Q674R7	3	1	1	1	1	7	159345974	145138637	0.406015	0.413763	eukaryotic	eukaryotic
9606.Q6NS38	3	1	1	1	1	7	133275310	145138637	0.407243	0.413763	eukaryotic	eukaryotic
9606.Q7Z3C6	3	1	1	1	1	7	242193530	145138637	0.399553	0.413763	eukaryotic	eukaryotic
9606.Q86XD8	3	1	1	1	1	7	133797423	145138637	0.413756	0.413763	eukaryotic	eukaryotic
9606.Q86Y07	3	1	1	1	1	7	242193530	145138637	0.399553	0.413763	eukaryotic	eukaryotic
9606.Q8IYQ7	3	1	1	1	1	7	133797423	145138637	0.413756	0.413763	eukaryotic	eukaryotic
9606.Q92819	3	1	1	1	1	7	145138637	145138637	0.400541	0.413763	eukaryotic	eukaryotic
9606.Q96EY8	3	1	1	1	1	7	133275310	145138637	0.407243	0.413763	eukaryotic	eukaryotic
9606.Q96GC9	3	1	1	1	1	7	83257442	145138637	0.451316	0.413763	eukaryotic	eukaryotic
9606.Q96P26	3	1	1	1	1	7	242193530	145138637	0.399553	0.413763	eukaryotic	eukaryotic
9606.Q96SB4	3	1	1	1	1	7	170805980	145138637	0.394366	0.413763	eukaryotic	eukaryotic
9606.Q9BXI3	3	1	1	1	1	7	248956423	145138637	0.386279	0.413763	eukaryotic	eukaryotic
9606.Q9H0N0	3	1	1	1	1	7	242193530	145138637	0.399553	0.413763	eukaryotic	eukaryotic
9606.Q9H2F3	3	1	1	1	1	7	90338346	145138637	0.403735	0.413763	eukaryotic	eukaryotic
9606.Q9NR45	3	1	1	1	1	7	138394718	145138637	0.36324	0.413763	eukaryotic	eukaryotic
9606.Q9P2J5	3	1	1	1	1	7	181538260	145138637	0.394469	0.413763	eukaryotic	eukaryotic
9606.Q9UI32	3	1	1	1	1	7	133275310	145138637	0.407243	0.413763	eukaryotic	eukaryotic
9606.Q9Y530	3	1	1	1	1	7	170805980	145138637	0.394366	0.413763	eukaryotic	eukaryotic
9606.Q9Y5K3	3	1	1	1	1	7	156040896	145138637	0.392343	0.413763	eukaryotic	eukaryotic
9606.Q9Y6E7	3	1	1	1	1	7	133275310	145138637	0.407243	0.413763	eukaryotic	eukaryotic
9713.A0A2U3X9U2	3	1	1	1	1	7	2861847	904032	0.310145	0.34745	eukaryotic	eukaryotic
9713.A0A2U3XCF0	3	1	1	1	1	7	2197879	904032	0.331858	0.34745	eukaryotic	eukaryotic
9713.A0A2U3XEJ8	3	1	1	1	1	7	2053087	904032	0.333473	0.34745	eukaryotic	eukaryotic
9713.A0A2U3XES3	3	1	1	1	1	7	1903972	904032	0.336677	0.34745	eukaryotic	eukaryotic
9713.A0A2U3XNJ3	3	1	1	1	1	7	1431695	904032	0.301665	0.34745	eukaryotic	eukaryotic
9713.A0A2U3YMF1	3	1	1	1	1	7	562604	904032	0.240955	0.34745	eukaryotic	eukaryotic
9713.A0A2U3YN46	3	1	1	1	1	7	508565	904032	0.25732	0.34745	eukaryotic	eukaryotic
9713.A0A2U3YR32	3	1	1	1	1	7	454044	904032	0.397543	0.34745	eukaryotic	eukaryotic
9785.G3SPI9	3	1	1	1	1	7	94539750	46401354	0.399334	0.408357	eukaryotic	eukaryotic
9785.G3SQ31	3	1	1	1	1	7	107953030	46401354	0.385931	0.408357	eukaryotic	eukaryotic
9785.G3SV17	3	1	1	1	1	7	67275362	46401354	0.387836	0.408357	eukaryotic	eukaryotic
9785.G3T0K3	3	1	1	1	1	7	46401354	46401354	0.395167	0.408357	eukaryotic	eukaryotic
9785.G3T2Q4	3	1	1	1	1	7	83325591	46401354	0.398818	0.408357	eukaryotic	eukaryotic
9785.G3T2Z2	3	1	1	1	1	7	102905070	46401354	0.382782	0.408357	eukaryotic	eukaryotic
9785.G3T9Y2	3	1	1	1	1	7	35432991	46401354	0.405977	0.408357	eukaryotic	eukaryotic
9785.G3TSQ9	3	1	1	1	1	7	111286943	46401354	0.391899	0.408357	eukaryotic	eukaryotic
9785.G3U1F4	3	1	1	1	1	7	65937430	46401354	0.41569	0.408357	eukaryotic	eukaryotic
9785.G3U844	3	1	1	1	1	7	65937430	46401354	0.41569	0.408357	eukaryotic	eukaryotic
9785.G3UJS8	3	1	1	1	1	7	93792749	46401354	0.386336	0.408357	eukaryotic	eukaryotic
9785.G3UKC1	3	1	1	1	1	7	129759342	46401354	0.383897	0.408357	eukaryotic	eukaryotic
9913.A4FV65	3	1	1	1	1	7	139009145	103308738	0.403581	0.471985	eukaryotic	eukaryotic
9913.E1BBM2	3	1	1	1	1	7	113319771	103308738	0.41159	0.471985	eukaryotic	eukaryotic
9913.E1BL52	3	1	1	1	1	7	120000602	103308738	0.405324	0.471985	eukaryotic	eukaryotic
9913.F1MCI2	3	1	1	1	1	7	60773036	103308738	0.43421	0.471985	eukaryotic	eukaryotic
9913.F1ML59	3	1	1	1	1	7	106982475	103308738	0.428581	0.471985	eukaryotic	eukaryotic
9913.F1N437	3	1	1	1	1	7	73167245	103308738	0.422914	0.471985	eukaryotic	eukaryotic
9913.Q0VCK0	3	1	1	1	1	7	136231103	103308738	0.407143	0.471985	eukaryotic	eukaryotic
9913.Q1RMX7	3	1	1	1	1	7	113319771	103308738	0.41159	0.471985	eukaryotic	eukaryotic
9913.Q2HJI9	3	1	1	1	1	7	120000602	103308738	0.405324	0.471985	eukaryotic	eukaryotic
9913.Q2KIR5	3	1	1	1	1	7	158534111	103308738	0.400865	0.471985	eukaryotic	eukaryotic
9913.Q2TBV1	3	1	1	1	1	7	87216184	103308738	0.403726	0.471985	eukaryotic	eukaryotic
9913.Q32L22	3	1	1	1	1	7	52498616	103308738	0.433487	0.471985	eukaryotic	eukaryotic
9913.Q32PI3	3	1	1	1	1	7	73167245	103308738	0.422914	0.471985	eukaryotic	eukaryotic
9913.Q3T904	3	1	1	1	1	7	136231103	103308738	0.407143	0.471985	eukaryotic	eukaryotic
9913.Q58DC5	3	1	1	1	1	7	120089317	103308738	0.417074	0.471985	eukaryotic	eukaryotic
2925.3	3	1	1	1	0	6	1114	738	0.677738	0.658537	eukaryotic	unknown
2925.33	3	1	1	1	0	6	3028	738	0.673712	0.658537	eukaryotic	unknown
2925.41	3	1	1	1	0	6	2064	738	0.699128	0.658537	eukaryotic	unknown
2925.43	3	1	1	1	0	6	2064	738	0.699128	0.658537	eukaryotic	unknown
2925.65	3	1	1	1	0	6	2064	738	0.699128	0.658537	eukaryotic	unknown
2925.7	3	1	1	1	0	6	3028	738	0.673712	0.658537	eukaryotic	unknown
89957.1	3	1	1	1	0	6	3500	874	0.566857	0.570881	eukaryotic	unknown
89957.4	3	1	1	0	1	6	976	874	0.591189	0.570881	unknown	eukaryotic
89957.6	3	1	1	0	1	6	1997	874	0.582874	0.570881	unknown	eukaryotic
89957.6	3	1	1	0	1	6	2784	874	0.54454	0.570881	unknown	eukaryotic
89957.7	3	1	1	0	1	6	625	874	0.6	0.570881	unknown	eukaryotic
133427	3	1	1	1	0	6	1505	852	0.665116	0.662944	eukaryotic	unknown
133427	3	1	1	0	1	6	2166	852	0.67867	0.662944	unknown	eukaryotic
133427	3	1	1	1	0	6	1761	852	0.639977	0.662944	eukaryotic	unknown
133428	3	1	1	0	1	6	1550	852	0.691613	0.662944	unknown	eukaryotic
133428	3	1	1	1	0	6	742	852	0.731806	0.662944	eukaryotic	unknown
133428	3	1	1	0	1	6	2166	852	0.67867	0.662944	unknown	eukaryotic
133428	3	1	1	1	0	6	1210	852	0.628926	0.662944	eukaryotic	unknown
285029	3	1	1	1	0	6	1062	1104	0.55838	0.584906	eukaryotic	unknown
285029	3	1	1	1	0	6	973	1104	0.577595	0.584906	eukaryotic	unknown
285029	3	1	1	0	1	6	1062	1104	0.55838	0.584906	unknown	eukaryotic
10090.A0A1Y7VNG9	3	1	1	0	1	6	120129023	130694994	0.406228	0.416058	unknown	eukaryotic
10090.D3Z3C6	3	1	1	0	1	6	149736547	130694994	0.404755	0.416058	unknown	eukaryotic
10090.F6YNI8	3	1	1	1	0	6	120129023	130694994	0.406228	0.416058	eukaryotic	unknown
10090.J3QP87	3	1	1	1	0	6	120129023	130694994	0.406228	0.416058	eukaryotic	unknown
10090.J3QPI8	3	1	1	0	1	6	120129023	130694994	0.406228	0.416058	unknown	eukaryotic
10090.O08650	3	1	1	0	1	6	129401214	130694994	0.411275	0.416058	unknown	eukaryotic
10090.P08775	3	1	1	1	0	6	122082544	130694994	0.426165	0.416058	eukaryotic	unknown
10090.P49586	3	1	1	0	1	6	98207769	130694994	0.396095	0.416058	unknown	eukaryotic
10090.Q3TL09	3	1	1	1	0	6	90702640	130694994	0.39954	0.416058	eukaryotic	unknown
10090.Q3UT53	3	1	1	0	1	6	120129023	130694994	0.406228	0.416058	unknown	eukaryotic
10090.Q60872	3	1	1	1	0	6	90702640	130694994	0.39954	0.416058	eukaryotic	unknown
10090.Q61647	3	1	1	1	0	6	94987272	130694994	0.412197	0.416058	eukaryotic	unknown
10090.Q811Q9	3	1	1	0	1	6	171031300	130694994	0.375225	0.416058	unknown	eukaryotic
10090.Q8BH55	3	1	1	1	0	6	182113225	130694994	0.412087	0.416058	eukaryotic	unknown
10090.Q8BMJ3	3	1	1	1	0	6	90702640	130694994	0.39954	0.416058	eukaryotic	unknown
10090.Q8BN21	3	1	1	1	0	6	122082544	130694994	0.426165	0.416058	eukaryotic	unknown
10090.Q8R323	3	1	1	1	0	6	151834685	130694994	0.41437	0.416058	eukaryotic	viral
10090.Q8R4U6	3	1	1	1	0	6	104043686	130694994	0.405895	0.416058	eukaryotic	unknown
10090.Q8R507	3	1	1	0	1	6	156508117	130694994	0.410915	0.416058	unknown	eukaryotic
10090.Q8R5F3	3	0	1	1	1	6	662434	130694994	0.473143	0.416058	eukaryotic	eukaryotic
10090.Q99J77	3	1	1	0	1	6	156508117	130694994	0.410915	0.416058	unknown	eukaryotic
10090.Q9CZD3	3	1	1	0	1	6	149736547	130694994	0.404755	0.416058	unknown	eukaryotic
10116.A0A0G2JVP1	3	1	1	1	0	6	115493447	145729303	0.391573	0.37177	eukaryotic	unknown
10116.A0A0G2K5G5	3	0	1	1	1	6	52716771	145729303	0.443596	0.37177	eukaryotic	eukaryotic
10116.B1WC93	3	1	1	0	1	6	184226340	145729303	0.39917	0.37177	unknown	eukaryotic
10116.D3ZRU3	3	1	1	1	0	6	122095298	145729303	0.400418	0.37177	eukaryotic	unknown
10116.D4A7E8	3	1	1	0	1	6	173707220	145729303	0.404852	0.37177	unknown	eukaryotic
10116.E9PTK4	3	1	1	1	0	6	90843780	145729303	0.407317	0.37177	eukaryotic	unknown
10116.G3V641	3	0	1	1	1	6	52716771	145729303	0.443596	0.37177	eukaryotic	eukaryotic
10116.P28492	3	1	1	0	1	6	145729303	145729303	0.403889	0.37177	unknown	eukaryotic
10116.Q02769	3	1	1	1	0	6	111246240	145729303	0.392458	0.37177	eukaryotic	unknown
10116.Q5M830	3	0	1	1	1	6	52716771	145729303	0.443596	0.37177	eukaryotic	eukaryotic
10116.Q5PPJ6	3	1	1	1	0	6	88201930	145729303	0.400322	0.37177	eukaryotic	unknown
10116.Q5U2U7	3	1	1	0	1	6	88201930	145729303	0.400322	0.37177	unknown	eukaryotic
10116.Q66HC2	3	1	1	1	0	6	282763075	145729303	0.405326	0.37177	eukaryotic	viral
104179.SymbF.scaffold1390.7	3	1	1	0	1	6	234471	268824	0.43483	0.132043	unknown	eukaryotic
104179.SymbF.scaffold454.16	3	1	1	1	0	6	427323	268824	0.452133	0.132043	eukaryotic	unknown
104179.SymbF.scaffold509.2	3	1	1	0	1	6	407208	268824	0.425046	0.132043	unknown	eukaryotic
104179.SymbF.scaffold805.6	3	1	1	1	0	6	325486	268824	0.439395	0.132043	eukaryotic	unknown
[truncated: 12,803 more rows]
