# Supplementary material for: Viral-eukaryotic gene exchange drives infection mode and cellular evolution
Source: Research Square preprint supplement (doi:10.21203/rs.3.rs-380297/v1), 2021-04-29
Supplement: Supplementary file 7 [file 5a265d091a3684738162d43a.xlsx]

## Sheet: VtoE_specific_VOGs_resolved.go_
Supplementary Table 4. Enriched gene ontology terms for transferred proteins with predicted subcellular compartments.
Enriched in	GO-categories	GO-term	Go-ID	p value	Fold enrichment	Test count	Background count	Expected
Nucleus	Biological_process	DNA replication	GO:0006260	0	3.90782	31	480	7.93281
Nucleus	Biological_process	DNA repair	GO:0006281	0	3.62278	47	785	12.9734
Nucleus	Biological_process	protein modification by small protein conjugation or removal	GO:0070647	0	3.3351	70	1270	20.9889
Nucleus	Biological_process	proteolysis involved in cellular protein catabolic process	GO:0051603	0	3.123	48	930	15.3698
Nucleus	Biological_process	cellular response to DNA damage stimulus	GO:0006974	0	2.98806	52	1053	17.4026
Nucleus	Biological_process	protein phosphorylation	GO:0006468	2e-07	2.07457	54	1575	26.0295
Nucleus	Biological_process	signaling	GO:0023052	3e-07	1.51441	111	4435	73.2959
Nucleus	Biological_process	regulation of cell cycle	GO:0051726	4e-07	2.16101	46	1288	21.2864
Nucleus	Biological_process	response to chemical	GO:0042221	1e-06	1.53259	106	4185	69.1642
Nucleus	Biological_process	regulation of protein modification process	GO:0031399	1.8e-06	2.00624	50	1508	24.9222
Nucleus	Biological_process	transcription by RNA polymerase II	GO:0006366	2.4e-06	1.81465	61	2034	33.6153
Nucleus	Biological_process	regulation of DNA metabolic process	GO:0051052	4.9e-05	2.59489	22	513	8.47819
Nucleus	Biological_process	chromatin organization	GO:0006325	6.41e-05	2.15587	30	842	13.9155
Nucleus	Biological_process	translational initiation	GO:0006413	0.0002464	3.39298	12	214	3.53671
Nucleus	Biological_process	DNA-templated transcription, initiation	GO:0006352	0.0002723	2.99334	14	283	4.67705
Nucleus	Biological_process	protein dephosphorylation	GO:0006470	0.0003618	2.90108	14	292	4.82579
Nucleus	Biological_process	DNA recombination	GO:0006310	0.0024791	2.16556	17	475	7.85018
Nucleus	Biological_process	telomere organization	GO:0032200	0.0026451	2.88134	10	210	3.4706
Nucleus	Biological_process	protein maturation	GO:0051604	0.0029945	2.33365	14	363	5.99919
Nucleus	Biological_process	RNA catabolic process	GO:0006401	0.0049219	2.13558	15	425	7.02384
Nucleus	Biological_process	protein folding	GO:0006457	0.005165	2.48355	11	268	4.42915
Nucleus	Biological_process	nuclear transport	GO:0051169	0.0069694	2.00027	16	484	7.99892
Nucleus	Cellular_compartment	chromosome	GO:0005694	0	2.04035	61	1809	29.8968
Nucleus	Cellular_compartment	nucleus	GO:0005634	0	1.66676	175	6353	104.994
Nucleus	Cellular_compartment	cytoplasm	GO:0005737	0.0003014	1.17049	203	10494	173.431
Nucleus	Cellular_compartment	nucleolus	GO:0005730	0.0044928	1.67917	29	1045	17.2704
Nucleus	Cellular_compartment	microtubule organizing center	GO:0005815	0.0072057	1.82804	20	662	10.9407
Nucleus	Molecular_function	transferase activity	GO:0016740	0	2.0037	111	3352	55.3975
Nucleus	Molecular_function	enzyme binding	GO:0019899	0	1.9589	72	2224	36.7554
Nucleus	Molecular_function	ion binding	GO:0043167	0	1.95334	129	3996	66.0406
Nucleus	Molecular_function	DNA binding	GO:0003677	0	1.94834	71	2205	36.4413
Nucleus	Molecular_function	hydrolase activity	GO:0016787	2.4e-06	1.60876	85	3197	52.8358
Nucleus	Molecular_function	peptidase activity	GO:0008233	8.2e-06	2.16519	37	1034	17.0886
Nucleus	Molecular_function	chromatin binding	GO:0003682	8.4e-06	2.62202	26	600	9.91601
Nucleus	Molecular_function	ATPase activity	GO:0016887	9.7e-05	2.54644	21	499	8.24682
Nucleus	Molecular_function	enzyme regulator activity	GO:0030234	0.0002814	1.98605	30	914	15.1054
Nucleus	Molecular_function	kinase activity	GO:0016301	0.0006532	1.70326	40	1421	23.4844
Nucleus	Molecular_function	nucleotidyltransferase activity	GO:0016779	0.0007227	2.43177	17	423	6.99079
Nucleus	Molecular_function	nuclease activity	GO:0004518	0.0012199	2.09682	21	606	10.0152
Nucleus	Molecular_function	translation factor activity, RNA binding	GO:0008135	0.0015833	3.66716	8	132	2.18152
Nucleus	Molecular_function	ubiquitin-like protein binding	GO:0032182	0.0025158	3.40891	8	142	2.34679
Nucleus	Molecular_function	transcription factor binding	GO:0008134	0.004018	1.93009	20	627	10.3622
Extracellular	Biological_process	protein maturation	GO:0051604	0.0001016	4.38278	10	363	2.28166
Extracellular	Biological_process	response to chemical	GO:0042221	0.0003149	1.63467	43	4185	26.3051
Extracellular	Biological_process	carbohydrate metabolic process	GO:0005975	0.0010185	2.70711	13	764	4.80217
Extracellular	Biological_process	proteolysis involved in cellular protein catabolic process	GO:0051603	0.0020796	2.39498	14	930	5.84557
Extracellular	Biological_process	signaling	GO:0023052	0.0039721	1.47078	41	4435	27.8765
Extracellular	Cellular_compartment	extracellular region	GO:0005576	0	5.8569	55	1494	9.39063
Extracellular	Cellular_compartment	vacuole	GO:0005773	0	3.99038	23	917	5.76386
Extracellular	Cellular_compartment	cytoplasmic vesicle	GO:0031410	0.0027025	1.95568	20	1627	10.2266
Extracellular	Cellular_compartment	endomembrane system	GO:0012505	0.0060168	1.51902	34	3561	22.3829
Extracellular	Molecular_function	peptidase activity	GO:0008233	0	4.00045	26	1034	6.49927
Extracellular	Molecular_function	hydrolase activity	GO:0016787	0	2.28913	46	3197	20.0949
Extracellular	Molecular_function	hydrolase activity, acting on glycosyl bonds	GO:0016798	3e-07	6.60601	12	289	1.81653
Extracellular	Molecular_function	oxidoreductase activity	GO:0016491	0.0061088	1.99492	16	1276	8.02037
Endoplasmic_reticulum	Biological_process	lipid metabolic process	GO:0006629	0	5.17472	40	1385	7.72988
Endoplasmic_reticulum	Biological_process	monocarboxylic acid metabolic process	GO:0032787	0	5.0936	17	598	3.33752
Endoplasmic_reticulum	Biological_process	membrane fusion	GO:0061025	0.0006824	4.16685	8	344	1.91991
Endoplasmic_reticulum	Biological_process	organelle fusion	GO:0048284	0.0016437	4.77799	6	225	1.25576
Endoplasmic_reticulum	Biological_process	protein folding	GO:0006457	0.0039138	4.01138	6	268	1.49575
Endoplasmic_reticulum	Biological_process	nucleus organization	GO:0006997	0.0079787	4.05373	5	221	1.23343
Endoplasmic_reticulum	Cellular_compartment	endoplasmic reticulum	GO:0005783	0	4.78089	44	1649	9.20331
Endoplasmic_reticulum	Cellular_compartment	endomembrane system	GO:0012505	0	2.91832	58	3561	19.8745
Endoplasmic_reticulum	Cellular_compartment	membrane	GO:0016020	0	1.90047	68	6411	35.7807
Endoplasmic_reticulum	Cellular_compartment	vacuole	GO:0005773	1.29e-05	3.32167	17	917	5.11791
Endoplasmic_reticulum	Cellular_compartment	Golgi apparatus	GO:0005794	1.83e-05	2.83504	20	1264	7.05457
Endoplasmic_reticulum	Cellular_compartment	cytoplasm	GO:0005737	5.01e-05	1.33177	78	10494	58.5685
Endoplasmic_reticulum	Cellular_compartment	cytoplasmic vesicle	GO:0031410	0.000588	2.20252	20	1627	9.08052
Endoplasmic_reticulum	Molecular_function	oxidoreductase activity	GO:0016491	1.6e-06	3.08922	22	1276	7.12154
Endoplasmic_reticulum	Molecular_function	transferase activity	GO:0016740	0.0043234	1.60359	30	3352	18.708
Endoplasmic_reticulum	Molecular_function	protein-macromolecule adaptor activity	GO:0030674	0.0081551	3.44567	6	312	1.74132
Cytoplasm	Biological_process	tRNA aminoacylation for protein translation	GO:0006418	0	10.6882	18	60	1.6841
Cytoplasm	Biological_process	cellular amino acid metabolic process	GO:0006520	0	4.37683	50	407	11.4238
Cytoplasm	Biological_process	nucleobase-containing small molecule metabolic process	GO:0055086	0	3.01651	74	874	24.5317
Cytoplasm	Biological_process	response to chemical	GO:0042221	0	1.63452	192	4185	117.466
Cytoplasm	Biological_process	proteolysis involved in cellular protein catabolic process	GO:0051603	6e-07	2.06869	54	930	26.1035
Cytoplasm	Biological_process	response to starvation	GO:0042594	6.57e-05	2.36884	25	376	10.5537
Cytoplasm	Biological_process	protein modification by small protein conjugation or removal	GO:0070647	9.38e-05	1.65513	59	1270	35.6467
Cytoplasm	Biological_process	cellular response to DNA damage stimulus	GO:0006974	0.0001055	1.72554	51	1053	29.5559
Cytoplasm	Biological_process	cytoplasmic translation	GO:0002181	0.0005482	2.57936	16	221	6.20309
Cytoplasm	Biological_process	DNA repair	GO:0006281	0.0007996	1.72464	38	785	22.0336
Cytoplasm	Biological_process	monocarboxylic acid metabolic process	GO:0032787	0.0016364	1.78733	30	598	16.7848
Cytoplasm	Biological_process	response to heat	GO:0009408	0.0023788	2.11648	18	303	8.50469
Cytoplasm	Biological_process	signaling	GO:0023052	0.0038289	1.21302	151	4435	124.483
Cytoplasm	Biological_process	protein phosphorylation	GO:0006468	0.0062705	1.37986	61	1575	44.2075
Cytoplasm	Biological_process	protein dephosphorylation	GO:0006470	0.008632	1.95219	16	292	8.19594
Cytoplasm	Biological_process	regulation of translation	GO:0006417	0.0088494	1.73792	22	451	12.6588
Cytoplasm	Cellular_compartment	cytoplasm	GO:0005737	0	1.33085	392	10494	294.548
Cytoplasm	Cellular_compartment	mitochondrion	GO:0005739	2e-06	1.63762	90	1958	54.9577
Cytoplasm	Cellular_compartment	vacuole	GO:0005773	5.7e-06	1.94261	50	917	25.7386
Cytoplasm	Cellular_compartment	nucleus	GO:0005634	6e-06	1.2674	226	6353	178.318
Cytoplasm	Molecular_function	ligase activity	GO:0016874	0	3.91715	42	382	10.7221
Cytoplasm	Molecular_function	hydrolase activity	GO:0016787	0	1.83876	165	3197	89.7343
Cytoplasm	Molecular_function	ion binding	GO:0043167	0	1.8099	203	3996	112.161
Cytoplasm	Molecular_function	transferase activity	GO:0016740	0	1.64745	155	3352	94.0849
Cytoplasm	Molecular_function	kinase activity	GO:0016301	1.4e-06	1.78012	71	1421	39.885
Cytoplasm	Molecular_function	lyase activity	GO:0016829	9.2e-06	2.41269	30	443	12.4342
Cytoplasm	Molecular_function	ATPase activity	GO:0016887	3.51e-05	2.21333	31	499	14.0061
Cytoplasm	Molecular_function	translation factor activity, RNA binding	GO:0008135	8.74e-05	3.50876	13	132	3.70501
Cytoplasm	Molecular_function	oxidoreductase activity	GO:0016491	0.0001922	1.61943	58	1276	35.8151
Cytoplasm	Molecular_function	nucleotidyltransferase activity	GO:0016779	0.0004041	2.10564	25	423	11.8729
Cytoplasm	Molecular_function	enzyme binding	GO:0019899	0.0007832	1.3937	87	2224	62.4238
Cytoplasm	Molecular_function	peptidase activity	GO:0008233	0.0039838	1.51606	44	1034	29.0226
Cytoplasm	Molecular_function	isomerase activity	GO:0016853	0.0044996	1.91032	20	373	10.4695
Cytoplasm	Molecular_function	phosphatase activity	GO:0016791	0.007088	1.72391	24	496	13.9219
