# Supplementary material for: Viral-eukaryotic gene exchange drives infection mode and cellular evolution
Source: Research Square preprint supplement (doi:10.21203/rs.3.rs-380297/v1), 2021-04-29
Supplement: Supplementary file 9 [file bf630a716589a5c71f49a176.xlsx]

## Sheet: VtoE_specific_VOGs_resolved.go_
Supplementary Table 3. Enriched gene ontology terms for transferred protein families.
Enriched in	GO-categories	GO-term	Go-ID	p value	Fold enrichment	Test count	Background count	Expected
Virus-to-Eukaryote	Biological_process	protein glycosylation	GO:0006486	8.3e-06	4.16269	14	263	3.36321
Virus-to-Eukaryote	Biological_process	tRNA processing	GO:0008033	0.0033232	2.99486	9	235	3.00515
Virus-to-Eukaryote	Biological_process	DNA-templated transcription, termination	GO:0006353	0.0037776	4.04478	6	116	1.48339
Virus-to-Eukaryote	Biological_process	RNA modification	GO:0009451	0.0043332	2.32098	13	438	5.60108
Virus-to-Eukaryote	Biological_process	transcription by RNA polymerase III	GO:0006383	0.0077981	4.07287	5	96	1.22763
Virus-to-Eukaryote	Biological_process	DNA replication	GO:0006260	0.0090824	2.11789	13	480	6.13817
Virus-to-Eukaryote	Molecular_function	nucleotidyltransferase activity	GO:0016779	0	5.54604	30	423	5.40927
Virus-to-Eukaryote	Molecular_function	transferase activity, transferring glycosyl groups	GO:0016757	0	5.38145	32	465	5.94636
Virus-to-Eukaryote	Molecular_function	nuclease activity	GO:0004518	0	3.35508	26	606	7.74944
Virus-to-Eukaryote	Molecular_function	helicase activity	GO:0004386	0.0021698	3.90996	7	140	1.7903
Virus-to-Eukaryote	Molecular_function	methyltransferase activity	GO:0008168	0.0059555	2.15509	14	508	6.49623
Eukaryote-to-Virus	Biological_process	cellular amino acid metabolic process	GO:0006520	0	2.50766	73	407	29.1108
Eukaryote-to-Virus	Biological_process	monocarboxylic acid metabolic process	GO:0032787	0	2.17431	93	598	42.7721
Eukaryote-to-Virus	Biological_process	nucleobase-containing small molecule metabolic process	GO:0055086	0	2.09556	131	874	62.5131
Eukaryote-to-Virus	Biological_process	proteolysis involved in cellular protein catabolic process	GO:0051603	0	2.08964	139	930	66.5186
Eukaryote-to-Virus	Biological_process	protein modification by small protein conjugation or removal	GO:0070647	0	1.83845	167	1270	90.8372
Eukaryote-to-Virus	Biological_process	lipid metabolic process	GO:0006629	0	1.71609	170	1385	99.0626
Eukaryote-to-Virus	Biological_process	response to chemical	GO:0042221	0	1.35969	407	4185	299.334
Eukaryote-to-Virus	Biological_process	carbohydrate metabolic process	GO:0005975	2e-07	1.70188	93	764	54.6454
Eukaryote-to-Virus	Biological_process	tRNA aminoacylation for protein translation	GO:0006418	1e-06	3.9613	17	60	4.29152
Eukaryote-to-Virus	Biological_process	protein maturation	GO:0051604	2.54e-05	1.84874	48	363	25.9637
Eukaryote-to-Virus	Biological_process	response to heat	GO:0009408	0.0005103	1.7534	38	303	21.6722
Eukaryote-to-Virus	Biological_process	response to oxidative stress	GO:0006979	0.0011178	1.48035	63	595	42.5576
Eukaryote-to-Virus	Biological_process	response to starvation	GO:0042594	0.0015526	1.5989	43	376	26.8935
Eukaryote-to-Virus	Biological_process	cellular response to DNA damage stimulus	GO:0006974	0.0041327	1.30118	98	1053	75.3162
Eukaryote-to-Virus	Biological_process	generation of precursor metabolites and energy	GO:0006091	0.0043418	1.39375	64	642	45.9193
Eukaryote-to-Virus	Biological_process	lipid transport	GO:0006869	0.0055473	1.59095	33	290	20.7423
Eukaryote-to-Virus	Biological_process	DNA repair	GO:0006281	0.0088355	1.31796	74	785	56.1474
Eukaryote-to-Virus	Biological_process	protein folding	GO:0006457	0.0097909	1.56504	30	268	19.1688
Eukaryote-to-Virus	Cellular_compartment	cytoplasm	GO:0005737	0	1.13378	851	10494	750.587
Eukaryote-to-Virus	Cellular_compartment	vacuole	GO:0005773	2e-07	1.67712	110	917	65.5887
Eukaryote-to-Virus	Cellular_compartment	extracellular region	GO:0005576	7.68e-05	1.35693	145	1494	106.859
Eukaryote-to-Virus	Cellular_compartment	peroxisome	GO:0005777	0.0003183	2.00754	28	195	13.9474
Eukaryote-to-Virus	Cellular_compartment	mitochondrion	GO:0005739	0.0004987	1.26387	177	1958	140.047
Eukaryote-to-Virus	Cellular_compartment	endoplasmic reticulum	GO:0005783	0.0014821	1.2633	149	1649	117.945
Eukaryote-to-Virus	Cellular_compartment	endomembrane system	GO:0012505	0.0043179	1.14644	292	3561	254.702
Eukaryote-to-Virus	Cellular_compartment	membrane	GO:0016020	0.0051906	1.09476	502	6411	458.549
Eukaryote-to-Virus	Molecular_function	ligase activity	GO:0016874	0	2.30578	63	382	27.3227
Eukaryote-to-Virus	Molecular_function	oxidoreductase activity	GO:0016491	0	1.76407	161	1276	91.2663
Eukaryote-to-Virus	Molecular_function	ion binding	GO:0043167	0	1.58844	454	3996	285.815
Eukaryote-to-Virus	Molecular_function	enzyme binding	GO:0016740	0	1.54743	371	3352	239.753
Eukaryote-to-Virus	Molecular_function	hydrolase activity	GO:0016787	0	1.49125	341	3197	228.666
Eukaryote-to-Virus	Molecular_function	peptidase activity	GO:0008233	4.5e-06	1.51439	112	1034	73.9572
Eukaryote-to-Virus	Molecular_function	transferase activity, transferring glycosyl groups	GO:0016757	2.37e-05	1.74387	58	465	33.2593
Eukaryote-to-Virus	Molecular_function	nucleotidyltransferase activity	GO:0016779	0.0001705	1.68566	51	423	30.2552
Eukaryote-to-Virus	Molecular_function	hydrolase activity, acting on glycosyl bonds	GO:0016798	0.0002048	1.83834	38	289	20.6708
Eukaryote-to-Virus	Molecular_function	lyase activity	GO:0016829	0.0005273	1.60956	51	443	31.6857
Eukaryote-to-Virus	Molecular_function	ubiquitin-like protein binding	GO:0032182	0.0027256	1.96916	20	142	10.1566
Eukaryote-to-Virus	Molecular_function	kinase activity	GO:0016301	0.0047682	1.24954	127	1421	101.637
Eukaryote-to-Virus	Molecular_function	ATPase activity	GO:0016887	0.0098529	1.40091	50	499	35.6911
Bidirectional	Biological_process	response to chemical	GO:0042221	3e-07	1.87581	57	4185	30.3869
Bidirectional	Biological_process	nucleobase-containing small molecule metabolic process	GO:0055086	5.8e-06	3.15158	20	874	6.34603
Bidirectional	Biological_process	cellular amino acid metabolic process	GO:0006520	4.21e-05	4.06065	12	407	2.95519
Bidirectional	Biological_process	DNA repair	GO:0006281	0.0005926	2.63167	15	785	5.69981
Bidirectional	Biological_process	cellular response to DNA damage stimulus	GO:0006974	0.0006229	2.35425	18	1053	7.64573
Bidirectional	Biological_process	tRNA aminoacylation for protein translation	GO:0006418	0.0009435	9.18159	4	60	0.435654
Bidirectional	Biological_process	response to starvation	GO:0042594	0.0017515	3.29658	9	376	2.7301
Bidirectional	Biological_process	protein phosphorylation	GO:0006468	0.0047367	1.83632	21	1575	11.4359
Bidirectional	Biological_process	peptidyl-amino acid modification	GO:0018193	0.0065594	1.98879	16	1108	8.04508
Bidirectional	Biological_process	DNA replication	GO:0006260	0.0083945	2.58232	9	480	3.48523
Bidirectional	Cellular_compartment	cytoplasm	GO:0005737	1.43e-05	1.31241	100	10494	76.1959
Bidirectional	Cellular_compartment	mitochondrion	GO:0005739	0.0007684	1.89915	27	1958	14.2169
Bidirectional	Molecular_function	ion binding	GO:0043167	0	1.96453	57	3996	29.0146
Bidirectional	Molecular_function	transferase activity	GO:0016740	6.1e-06	1.89001	46	3352	24.3386
Bidirectional	Molecular_function	hydrolase activity	GO:0016787	9.1e-06	1.89548	44	3197	23.2131
Bidirectional	Molecular_function	ATPase activity	GO:0016887	6.54e-05	3.588	13	499	3.62319
Bidirectional	Molecular_function	peptidase activity	GO:0008233	0.0004818	2.39751	18	1034	7.50778
Bidirectional	Molecular_function	ligase activity	GO:0016874	0.0004906	3.60534	10	382	2.77367
Bidirectional	Molecular_function	oxidoreductase activity	GO:0016491	0.0008736	2.15868	20	1276	9.26491
Bidirectional	Molecular_function	lyase activity	GO:0016829	0.0050856	2.798	9	443	3.21658
Bidirectional	Molecular_function	kinase activity	GO:0016301	0.0070062	1.84149	19	1421	10.3177
