# Supplementary material for: Viral-eukaryotic gene exchange drives infection mode and cellular evolution
Source: Research Square preprint supplement (doi:10.21203/rs.3.rs-380297/v1), 2021-04-29
Supplement: Supplementary file 10 [file dd6cf14718a23289527b1c42.xlsx]

## Sheet: TableS1_HGTSummary_slim
Supplementary Table 1. Summary of all detected HGTs. An expanded table including sequence identifiers for each HGT is available from Dryad.
HGT characteristics						Topology notes and statistics				PANTHER annotations			EggNOG annotations
COG	Direction	Recipient_taxaID	Recipient_name	Donor_taxaID	Donor_name	Notes	Recipient_branch_length	Sister_support	Cousin_support	TopAnnotation	%withTopAnnotation	TotalAnnotatedSequences	EggNOG_TopAnnotation	%withTopAnnotation	TotalAnnotatedSequences	TotalSequences	DeepLoc_predicted_localization
COG000109	VtoE	1257118	Acanthamoeba castellanii str. Neff	10239	Viruses	origin = unkn, cousin unclear	0.29319	99.6	88.1	CYTOSINE-SPECIFIC METHYLTRANSFERASE	0.5123	730	C-5 cytosine-specific DNA methylase	0.494406	1430	1459	Unknown
COG000110	VtoE	1257118	Acanthamoeba castellanii str. Neff	10239	Viruses	origin = unkn	0.368083	84	80.9	DEOXYURIDINE 5'-TRIPHOSPHATE NUCLEOTIDOHYDROLASE	1	940	dUTPase	0.432432	1406	1412	Mitochondrion
COG005875	VtoE	1257118	Acanthamoeba castellanii str. Neff	10239	Viruses	origin = unkn	1.15091	84.7	root	No annotation	0	0	nucleotidyltransferase activity	1	13	16	Nucleus
COG003406	VtoE	1257118	Acanthamoeba castellanii str. Neff	12429	unclassified viruses	origin = eukaryotic	0.444938	93.2	97.7	FOLATE SYNTHESIS PROTEINS	0.5	2	Belongs to the glycosyl hydrolase 32 family	0.666667	3	70	Unknown
COG003491	VtoE	1257118	Acanthamoeba castellanii str. Neff	12429	unclassified viruses	origin = virus	0.471806	99.6	97.3	No annotation	0	0	extracellular region	1	67	67	Extracellular
COG000299	VtoE	1257118	Acanthamoeba castellanii str. Neff	455363	unclassified Phycodnaviridae	origin = eukaryotic	0.346077	90.1	83.9	TRANSCRIPTION TERMINATION FACTOR 2-RELATED	0.992	749	SNF2 family N-terminal domain	0.203922	765	775	Nucleus
COG004735	VtoE	1257118	Acanthamoeba castellanii str. Neff	455363	unclassified Phycodnaviridae	origin = virus	1.99858	93.8	99.6	No annotation	0	0	no annotation	0	0	30	Cytoplasm
COG001752	VtoE	1257118	Acanthamoeba castellanii str. Neff	1678078	Mollivirus sibericum	origin = eukaryotic	0.355661	98.8	100	DEFERROCHELATASE/PEROXIDASE	1	37	Dyp-type peroxidase family	0.513369	187	187	Unknown
COG002717	VtoE	1257118	Acanthamoeba castellanii str. Neff	1678078	Mollivirus sibericum	origin = virus	0.217982	92.5	100	DNA-DIRECTED RNA POLYMERASES I, II, AND III SUBUNIT RPABC1	1	74	DNA-directed 5'-3' RNA polymerase activity	0.307692	78	113	Nucleus
COG004200	VtoE	1257118	Acanthamoeba castellanii str. Neff	1678078	Mollivirus sibericum	origin = prokaryotic	0.100028	90.4	99.8	No annotation	0	0	Involved in chromosome partitioning	0.880952	42	42	Cytoplasm
COG006370	VtoE	1257118	Acanthamoeba castellanii str. Neff	1678078	Mollivirus sibericum	origin = virus	0.334021	100	100	CARBON CATABOLITE REPRESSOR PROTEIN 4	0.75	4	no annotation	0	0	13	Cytoplasm
COG000068	VtoE	1257118	Acanthamoeba castellanii str. Neff	2060084	Pandoravirus	origin = eukaryotic	0.293386	80.8	98.9	RIBONUCLEOSIDE-DIPHOSPHATE REDUCTASE SMALL CHAIN	0.9972	1762	Ribonucleotide reductase, small chain	0.392931	1924	1961	Unknown
COG005111	VtoE	1257118	Acanthamoeba castellanii str. Neff	2060084	Pandoravirus	origin = virus	0.577259	100	root	ANKYRIN REPEAT-CONTAINING PROTEIN	1	22	no annotation	0	0	24	Unknown
COG004371	VtoE	1257118	Acanthamoeba castellanii str. Neff	2080449	Acanthamoeba castellanii medusavirus	origin = virus	0.61467	99.7	root	No annotation	0	0	no annotation	0	0	38	Unknown
COG007062	VtoE	1257118	Acanthamoeba castellanii str. Neff	2080449	Acanthamoeba castellanii medusavirus	origin = virus	0.742099	98.2	99.9	PTHR36493	1	1	N-acetylmuramoyl-L-alanine amidase activity	1	2	10	Cytoplasm
COG007715	VtoE	1257118	Acanthamoeba castellanii str. Neff	2080449	Acanthamoeba castellanii medusavirus	origin = virus	0.209841	94.9	93.2	No annotation	0	0	no annotation	0	0	8	Cell_membrane
COG007715	VtoE	1257118	Acanthamoeba castellanii str. Neff	2080449	Acanthamoeba castellanii medusavirus	origin = virus	0.47178	94.9	root	No annotation	0	0	no annotation	0	0	8	Cell_membrane
COG000043	VtoE	1257118	Acanthamoeba castellanii str. Neff	2732007	Nucleocytoviricota	origin = unkn	0.769554	89.2	83.9	THYMIDYLATE SYNTHASE 1	0.701	2381	Thymidylate synthase	0.35328	2607	2647	Peroxisome
COG000208	VtoE	1257118	Acanthamoeba castellanii str. Neff	2732007	Nucleocytoviricota	origin = eukaryotic	0.80797	87.8	97.9	DIMETHYLANILINE MONOOXYGENASE	0.9342	805	N,N-dimethylaniline monooxygenase activity	0.258496	971	977	Endoplasmic_reticulum
COG000380	VtoE	1257118	Acanthamoeba castellanii str. Neff	2732007	Nucleocytoviricota	origin = virus	1.43766	91.4	82.8	No annotation	0	0	Predicted membrane protein (DUF2177)	0.735537	242	649	Endoplasmic_reticulum
COG004232	VtoE	1257118	Acanthamoeba castellanii str. Neff	2732007	Nucleocytoviricota	origin = virus	1.96145	root	root	No annotation	0	0	kinase activity	0.615385	26	41	Unknown
COG000031	VtoE	1257118	Acanthamoeba castellanii str. Neff	Weakly supported	Weakly supported	origin = virus, long branching donor	0.112239	90.2	99.6	REGULATOR OF CHROMOSOME CONDENSATION	0.5	4	Large eukaryotic DNA virus major capsid protein	0.999061	3194	3272	Cytoplasm
COG000101	VtoE	1257118	Acanthamoeba castellanii str. Neff	Weakly supported	Weakly supported	origin = virus, long branching recipient	1.01391	99.9	92.6	PHOSPHORYN, PUTATIVE-RELATED-RELATED	1	1	adenyl ribonucleotide binding	0.989933	1490	1535	Unknown
COG000125	VtoE	1257118	Acanthamoeba castellanii str. Neff	Weakly supported	Weakly supported	origin = unkn, long branching recipient	1.26803	88.2	82.2	DEOXYCYTIDYLATE DEAMINASE-RELATED	0.9988	855	Cytidine and deoxycytidylate deaminase zinc-binding region	0.382065	1327	1337	Nucleus
COG000165	VtoE	1257118	Acanthamoeba castellanii str. Neff	Weakly supported	Weakly supported	origin = eukaryotic, long branching recipient	1.51072	82.6	90.4	TRANSCRIPTION FACTOR S-II ZINC FINGER DOMAIN-CONTAINING PROTEIN	1	934	Transcription factor S-II (TFIIS)	0.307116	1068	1112	Unknown
COG000821	VtoE	1257118	Acanthamoeba castellanii str. Neff	Weakly supported	Weakly supported	origin = eukaryotic, long branching recipient	1.7365	89	85.6	RAN GTPASE	0.967	364	GTP-binding protein involved in nucleocytoplasmic transport	0.651351	370	376	Unknown
COG000821	VtoE	1257118	Acanthamoeba castellanii str. Neff	Weakly supported	Weakly supported	origin = eukaryotic, long branching donor	0.861523	96.7	83.3	RAN GTPASE	0.967	364	GTP-binding protein involved in nucleocytoplasmic transport	0.651351	370	376	Peroxisome
COG000916	VtoE	1257118	Acanthamoeba castellanii str. Neff	Weakly supported	Weakly supported	origin = eukaryotic, long branching donor	1.24339	83.6	86.4	ASPARTATE BETA-HYDROXYLASE DOMAIN-CONTAINING PROTEIN 2	0.9756	82	Aspartyl/Asparaginyl beta-hydroxylase	0.357349	347	350	Cytoplasm
COG001222	VtoE	1257118	Acanthamoeba castellanii str. Neff	Weakly supported	Weakly supported	origin = prokaryotic, long branching recipient	1.05904	80.3	90.5	PTHR36172	1	96	recombinase activity	0.287879	264	270	Unknown
COG003160	VtoE	1257118	Acanthamoeba castellanii str. Neff	Weakly supported	Weakly supported	origin = virus, long branching donor	1.11202	100	root	PHOSPHATIDYLINOSITOL-4-PHOSPHATE 5-KINASE RELATED	0.9595	74	F-box and WD-40 domain-containing protein CDC4	0.4	5	84	Unknown
COG003160	VtoE	1257118	Acanthamoeba castellanii str. Neff	Weakly supported	Weakly supported	origin = virus, long branching donor	1.24923	100	root	PHOSPHATIDYLINOSITOL-4-PHOSPHATE 5-KINASE RELATED	0.9595	74	F-box and WD-40 domain-containing protein CDC4	0.4	5	84	Unknown
COG005167	VtoE	1257118	Acanthamoeba castellanii str. Neff	Weakly supported	Weakly supported	origin = virus, long branching donor	0.472734	81.4	root	No annotation	0	0	no annotation	0	0	23	Extracellular
COG005640	VtoE	1257118	Acanthamoeba castellanii str. Neff	Weakly supported	Weakly supported	origin = virus, long branching recipient	2.9531	89.8	92.3	CYTOCHROME P450	0.6	15	sterol 14-demethylase activity	0.470588	17	17	Cytoplasm
COG006164	VtoE	1257118	Acanthamoeba castellanii str. Neff	Weakly supported	Weakly supported	origin = virus, long branching recipient	2.81706	94.5	100	PHOSPHATIDYLINOSITOL-4-PHOSPHATE 5-KINASE RELATED	0.7857	14	no annotation	0	0	14	Unknown
COG007062	VtoE	1257118	Acanthamoeba castellanii str. Neff	Weakly supported	Weakly supported	origin = virus, sister unclear	0.295981	99.9	root	PTHR36493	1	1	N-acetylmuramoyl-L-alanine amidase activity	1	2	10	Unknown
COG007066	VtoE	1257118	Acanthamoeba castellanii str. Neff	Weakly supported	Weakly supported	origin = virus, long branching recipient	2.19604	root	root	PHYTANOYL-COA DIOXYGENASE-RELATED-RELATED	1	3	no annotation	0	0	10	Nucleus
COG007713	VtoE	7159	Aedes aegypti	1922348	unclassified RNA viruses ShiM-2016	origin = virus	1.4416	99.2	100	No annotation	0	0	no annotation	0	0	8	Nucleus
COG003468	VtoE	7159	Aedes aegypti	2559587	Riboviria	origin = virus	1.12635	100	99.7	No annotation	0	0	Mononegavirales mRNA-capping region V	1	65	67	Cytoplasm
COG000002	VtoE	7159	Aedes aegypti	Weakly supported	Weakly supported	origin = virus, long branching recipient	1.82047	94	96.7	No annotation	0	0	ATP-dependent helicase activity	1	15508	15658	Mitochondrion
COG000002	VtoE	7159	Aedes aegypti	Weakly supported	Weakly supported	origin = virus, long branching donor	1.5078e-06	99.9	98.9	No annotation	0	0	ATP-dependent helicase activity	1	15508	15658	Cytoplasm
COG000092	VtoE	7159	Aedes aegypti	Weakly supported	Weakly supported	origin = virus, long branching recipient	0.670671	100	99.9	No annotation	0	0	Mononegavirales mRNA-capping region V	1	1569	1597	Unknown
COG000721	VtoE	7159	Aedes aegypti	Weakly supported	Weakly supported	origin = unkn, long branching donor	1.09648	94.2	96.4	No annotation	0	0	Rhabdovirus nucleocapsid protein	0.971223	417	419	Cytoplasm
COG001618	VtoE	7159	Aedes aegypti	Weakly supported	Weakly supported	origin = virus, long branching recipient	2.42333	88.3	85.8	UNCHARACTERIZED	0.5417	96	RNA processing	0.989848	197	203	Cytoplasm
COG002592	VtoE	7159	Aedes aegypti	Weakly supported	Weakly supported	origin = virus, long branching recipient	2.19451	100	97.7	No annotation	0	0	Rhabdovirus spike glycoprotein	1	122	125	Extracellular
COG000185	VtoE	65357	Albugo candida	2732007	Nucleocytoviricota	origin = eukaryotic	1.27304	84.6	86	PROTEIN DISULFIDE ISOMERASE	0.7652	1005	Thioredoxin-like domain	0.160118	1018	1036	Endoplasmic_reticulum
COG000001	VtoE	65357	Albugo candida	Weakly supported	Weakly supported	origin = eukaryotic, long branching recipient	2.51536	99.5	84.3	SERINE/THREONINE-PROTEIN KINASE	0.2995	16718	protein serine/threonine kinase activity	0.191391	17075	17289	Nucleus
COG001488	VtoE	2925	Alexandrium catenella	455363	unclassified Phycodnaviridae	origin = prokaryotic	1.04676	99.5	98.4	ANNEXIN	0.9341	182	Patatin-like phospholipase	0.666667	216	220	Mitochondrion
COG004099	VtoE	2925	Alexandrium catenella	1977639	Klosneuvirus	origin = eukaryotic	0.810801	98.5	100	PHYTANOYL-COA DIOXYGENASE-RELATED-RELATED	0.9762	42	Phytanoyl-CoA dioxygenase (PhyH)	0.627907	43	44	Cytoplasm
COG000989	VtoE	2925	Alexandrium catenella	2732007	Nucleocytoviricota	origin = eukaryotic	0.482149	96.6	98.5	AMMONIUM TRANSPORTER	1	290	Belongs to the ammonium transporter (TC 2	0.429448	326	329	Unknown
COG001908	VtoE	2925	Alexandrium catenella	2732007	Nucleocytoviricota	origin = virus	0.62573	88.7	88.6	MANNOSYL PHOSPHORYLINOSITOL CERAMIDE SYNTHASE	0.3889	18	O-methyltransferase	0.531915	94	174	Cytoplasm
COG000753	VtoE	2925	Alexandrium catenella	Weakly supported	Weakly supported	origin = unkn, long branching recipient	4.6512	93.8	86.5	ENDOTHELIAL DIFFERENTIATION-RELATED FACTOR 1 MULTIPROTEIN BRIDGING FACTOR 1	1	361	Helix-turn-helix XRE-family like proteins	0.20354	339	401	Extracellular
COG003841	VtoE	2925	Alexandrium catenella	Weakly supported	Weakly supported	origin = eukaryotic, long branching recipient	5.79169	93.1	95.6	STEROL DESATURASE	0.7143	42	Belongs to the sterol desaturase family	0.632653	49	52	Unknown
COG005724	VtoE	2925	Alexandrium catenella	Weakly supported	Weakly supported	origin = virus, sister unclear	1.91521	84.6	root	No annotation	0	0	Putative 2OG-Fe(II) oxygenase	0.933333	15	17	Mitochondrion
COG000533	VtoE	33630	Alveolata	549779	Mimiviridae	origin = prokaryotic	0.204542	83.3	80.7	BIFUNCTIONAL 3'-PHOSPHOADENOSINE 5'-PHOSPHOSULFATE SYNTHASE	0.3771	236	Catalyzes the synthesis of activated sulfate	0.598095	525	528	Cytoplasm
COG000381	VtoE	33630	Alveolata	2732007	Nucleocytoviricota	origin = unkn, cousin unclear	0.151993	88.2	99.9	GDP-L-FUCOSE SYNTHASE	0.9973	370	Catalyzes the two-step NADP-dependent conversion of GDP- 4-dehydro-6-deoxy-D-mannose to GDP-fucose, involving an epimerase and a reductase reaction	0.416149	644	646	Cytoplasm
COG001408	VtoE	33630	Alveolata	2732523	Megaviricetes	origin = eukaryotic	0.694574	83.5	97.4	MRNA GUANINE-7- METHYLTRANSFERASE	1	226	Belongs to the class I-like SAM-binding methyltransferase superfamily	0.586207	232	234	Cytoplasm
COG000235	VtoE	13333	Amborella trichopoda	10239	Viruses	origin = virus	2.7895e-06	root	root	PHOTOSYSTEM II PROTEIN D1	1	844	Photosystem II (PSII) is a light-driven water plastoquinone oxidoreductase that uses light energy to abstract electrons from H(2)O, generating O(2) and a proton gradient subsequently used for ATP formation	0.519651	916	916	Unknown
COG000235	VtoE	13333	Amborella trichopoda	10239	Viruses	origin = virus	0.0141833	root	root	PHOTOSYSTEM II PROTEIN D1	1	844	Photosystem II (PSII) is a light-driven water plastoquinone oxidoreductase that uses light energy to abstract electrons from H(2)O, generating O(2) and a proton gradient subsequently used for ATP formation	0.519651	916	916	Lysosome/Vacuole
COG000235	VtoE	13333	Amborella trichopoda	10239	Viruses	origin = virus	0.0140473	root	root	PHOTOSYSTEM II PROTEIN D1	1	844	Photosystem II (PSII) is a light-driven water plastoquinone oxidoreductase that uses light energy to abstract electrons from H(2)O, generating O(2) and a proton gradient subsequently used for ATP formation	0.519651	916	916	Lysosome/Vacuole
COG006027	VtoE	13333	Amborella trichopoda	2559587	Riboviria	origin = virus	1.64906	96.6	root	No annotation	0	0	viral nucleocapsid	1	14	15	Nucleus
COG000069	VtoE	13333	Amborella trichopoda	Weakly supported	Weakly supported	origin = eukaryotic, long branching recipient	1.12687	82.1	89.6	ENZYMATIC POLYPROTEIN-RELATED	0.9934	1372	polyprotein	0.647557	1535	1954	Cytoplasm
COG000069	VtoE	13333	Amborella trichopoda	Weakly supported	Weakly supported	origin = eukaryotic, long branching recipient	0.155751	98	82.6	ENZYMATIC POLYPROTEIN-RELATED	0.9934	1372	polyprotein	0.647557	1535	1954	Cytoplasm
COG000069	VtoE	13333	Amborella trichopoda	Weakly supported	Weakly supported	origin = eukaryotic, long branching recipient	0.652616	100	82.6	ENZYMATIC POLYPROTEIN-RELATED	0.9934	1372	polyprotein	0.647557	1535	1954	Cytoplasm
COG000069	VtoE	13333	Amborella trichopoda	Weakly supported	Weakly supported	origin = eukaryotic, long branching recipient	2.31666	92.9	100	ENZYMATIC POLYPROTEIN-RELATED	0.9934	1372	polyprotein	0.647557	1535	1954	Nucleus
COG000235	VtoE	13333	Amborella trichopoda	Weakly supported	Weakly supported	origin = virus, long branching recipient	0.0788251	root	root	PHOTOSYSTEM II PROTEIN D1	1	844	Photosystem II (PSII) is a light-driven water plastoquinone oxidoreductase that uses light energy to abstract electrons from H(2)O, generating O(2) and a proton gradient subsequently used for ATP formation	0.519651	916	916	Lysosome/Vacuole
COG000235	VtoE	13333	Amborella trichopoda	Weakly supported	Weakly supported	origin = virus, long branching recipient	0.117939	root	root	PHOTOSYSTEM II PROTEIN D1	1	844	Photosystem II (PSII) is a light-driven water plastoquinone oxidoreductase that uses light energy to abstract electrons from H(2)O, generating O(2) and a proton gradient subsequently used for ATP formation	0.519651	916	916	Extracellular
COG000312	VtoE	13333	Amborella trichopoda	Weakly supported	Weakly supported	origin = unkn, long branching recipient	1.49667	91.4	81.8	GLUTAMINE SYNTHETASE	1	595	glutamine synthetase	0.484646	749	755	Mitochondrion
COG002983	VtoE	32524	Amniota	11632	Retroviridae	origin = eukaryotic	0.093135	95	90.4	GAG RETROVIRAL POLYPROTEIN	1	90	Protease-like	0.354839	93	94	Cytoplasm
COG000007	VtoE	32524	Amniota	Weakly supported	Weakly supported	origin = virus, long branching recipient	0.146968	87.5	99.2	ENDOGENOUS RETROVIRUS GROUP K MEMBER POL PROTEIN	0.7503	5615	ribonuclease H activity	0.620133	7987	8051	Cytoplasm
COG006557	VtoE	1775427	Amoebophrya sp. AT5.2	549779	Mimiviridae	origin = virus	0.462387	94.3	root	No annotation	0	0	atrnl,rnl	1	1	12	Cytoplasm
COG005538	VtoE	1775427	Amoebophrya sp. AT5.2	2487766	Faunusvirus sp.	origin = virus	2.07138	90.7	94.5	THIOREDOXIN	1	6	protein disulfide oxidoreductase activity	0.25	12	18	Unknown
COG001908	VtoE	1775427	Amoebophrya sp. AT5.2	2732007	Nucleocytoviricota	origin = virus	0.950373	89.8	86.3	MANNOSYL PHOSPHORYLINOSITOL CERAMIDE SYNTHASE	0.3889	18	O-methyltransferase	0.531915	94	174	Plastid
COG003697	VtoE	1775427	Amoebophrya sp. AT5.2	2732007	Nucleocytoviricota	origin = virus, cousin unclear	0.62288	96.7	84	MANNOSYL PHOSPHORYLINOSITOL CERAMIDE SYNTHASE	1	50	mannosyl-inositol phosphorylceramide biosynthetic process	0.468085	47	58	Cytoplasm
COG001253	VtoE	1775427	Amoebophrya sp. AT5.2	2732523	Megaviricetes	origin = unkn	1.01409	86.7	84.9	CYTOSINE DEAMINASE FAMILY MEMBER	0.5714	7	SET (Su(var)3-9, Enhancer-of-zeste, Trithorax) domain	0.619608	255	262	Mitochondrion
COG004546	VtoE	1775427	Amoebophrya sp. AT5.2	2732523	Megaviricetes	origin = eukaryotic	0.593841	83.9	root	No annotation	0	0	Uncharacterized protein conserved in bacteria (DUF2237)	1	1	34	Unknown
COG005724	VtoE	1775427	Amoebophrya sp. AT5.2	2733087	Ahtivirus	origin = virus	1.86837	94.4	root	No annotation	0	0	Putative 2OG-Fe(II) oxygenase	0.933333	15	17	Unknown
COG000014	VtoE	1775427	Amoebophrya sp. AT5.2	Weakly supported	Weakly supported	origin = eukaryotic, long branching recipient	1.53079	99.8	91.3	DNAJ HOMOLOG SUBFAMILY C MEMBER	0.3541	3253	ATP binding to DnaK triggers the release of the substrate protein, thus completing the reaction cycle	0.315643	5747	5826	Cytoplasm
COG000024	VtoE	1775427	Amoebophrya sp. AT5.2	Weakly supported	Weakly supported	origin = unkn, long branching recipient	4.28992	86.1	80.6	DNA-DIRECTED RNA POLYMERASE I SUBUNIT 2	0.9997	3308	DNA-dependent RNA polymerase catalyzes the transcription of DNA into RNA using the four ribonucleoside triphosphates as substrates	0.58331	3511	3673	Unknown
COG000239	VtoE	1775427	Amoebophrya sp. AT5.2	Weakly supported	Weakly supported	origin = virus, long branching recipient	2.30456	81.2	84.1	DNA-DIRECTED RNA POLYMERASE SUBUNIT K	0.9051	411	RNA polymerase Rpb6	0.524297	782	905	Nucleus
COG000284	VtoE	1775427	Amoebophrya sp. AT5.2	Weakly supported	Weakly supported	origin = virus, long branching recipient	1.571	root	root	DNA POLYMERASE CATALYTIC SUBUNIT	0.9987	799	DNA polymerase family B	0.57375	800	800	Nucleus
COG000360	VtoE	1775427	Amoebophrya sp. AT5.2	Weakly supported	Weakly supported	origin = unkn, long branching recipient	4.47462	85.4	81.5	(E3-INDEPENDENT) E2 UBIQUITIN-CONJUGATING ENZYME	0.9877	653	protein modification by small protein conjugation	0.727549	657	675	Nucleus
COG001264	VtoE	1775427	Amoebophrya sp. AT5.2	Weakly supported	Weakly supported	origin = eukaryotic, long branching recipient	1.55734	80.6	97.7	DEHYDROGENASE, PUTATIVE-RELATED	1	110	Catalyzes the NADPH-dependent formation of L-aspartate- semialdehyde (L-ASA) by the reductive dephosphorylation of L- aspartyl-4-phosphate	0.615385	260	260	Mitochondrion
COG003045	VtoE	1775427	Amoebophrya sp. AT5.2	Weakly supported	Weakly supported	origin = eukaryotic, long branching recipient	10.6048	89.6	85	No annotation	0	0	identical protein binding	1	5	90	Nucleus
COG003484	VtoE	1775427	Amoebophrya sp. AT5.2	Weakly supported	Weakly supported	origin = virus, long branching recipient	2.33059	93.4	root	CONSERVED PROTEIN	0.8333	6	protein-(glutamine-N5) methyltransferase activity	0.5	2	67	Cytoplasm
COG003697	VtoE	1775427	Amoebophrya sp. AT5.2	Weakly supported	Weakly supported	origin = eukaryotic, long branching recipient	2.39492	96.7	84	MANNOSYL PHOSPHORYLINOSITOL CERAMIDE SYNTHASE	1	50	mannosyl-inositol phosphorylceramide biosynthetic process	0.468085	47	58	Cytoplasm
COG003939	VtoE	1775427	Amoebophrya sp. AT5.2	Weakly supported	Weakly supported	origin = prokaryotic, long branching recipient	2.79616	100	root	PROCOLLAGEN-LYSINE,2-OXOGLUTARATE 5-DIOXYGENASE/GLYCOSYLTRANSFERASE 25 FAMILY MEMBER	1	41	procollagen-lysine 5-dioxygenase activity	0.368421	38	49	Unknown
COG000450	VtoE	554915	Amoebozoa	2506605	Marseillevirus LCMAC201	origin = eukaryotic, cousin unclear	0.211475	100	92	INOSINE-5-MONOPHOSPHATE DEHYDROGENASE RELATED	0.9438	427	Catalyzes the conversion of inosine 5'-phosphate (IMP) to xanthosine 5'-phosphate (XMP), the first committed and rate- limiting step in the de novo synthesis of guanine nucleotides, and therefore plays an important role in the regulation of cell growth	0.698795	581	589	Unknown
COG000056	VtoE	400682	Amphimedon queenslandica	10239	Viruses	origin = unkn	1.14738	93.7	94.9	EXPRESSED PROTEIN	1	1	ATPase activity, uncoupled	0.985007	2201	2227	Cytoplasm
COG003083	VtoE	400682	Amphimedon queenslandica	549779	Mimiviridae	origin = virus	0.782095	83.5	89.4	COLANIC ACID BIOSYNTHESIS PROTEIN WCAK	0.9474	19	Tetratricopeptide TPR_2 repeat protein	0.593023	86	88	Cytoplasm
COG000005	VtoE	400682	Amphimedon queenslandica	Weakly supported	Weakly supported	origin = eukaryotic, long branching recipient	1.47108	87.9	88.5	DRAB5-RELATED	0.2327	10584	Rab subfamily of small GTPases	0.149102	10798	10903	Unknown
COG000069	VtoE	400682	Amphimedon queenslandica	Weakly supported	Weakly supported	origin = virus, long branching recipient	1.01494	89.6	89.4	ENZYMATIC POLYPROTEIN-RELATED	0.9934	1372	polyprotein	0.647557	1535	1954	Cytoplasm
COG000026	VtoE	59799	Angomonas deanei	Weakly supported	Weakly supported	origin = eukaryotic, long branching recipient	1.37999	95.4	89	ATP-DEPENDENT RNA HELICASE	0.9878	3193	Helicase associated domain (HA2) Add an annotation	0.18964	3475	3528	Unknown
COG000108	VtoE	59799	Angomonas deanei	Weakly supported	Weakly supported	origin = eukaryotic, long branching recipient	4.60582	100	85.8	DNA POLYMERASE TYPE-X FAMILY MEMBER	0.7341	1245	DNA ligase (NAD+) activity	0.532909	1413	1460	Mitochondrion
COG000043	VtoE	5794	Apicomplexa	10239	Viruses	origin = unkn	0.109909	94.1	89.6	THYMIDYLATE SYNTHASE 1	0.701	2381	Thymidylate synthase	0.35328	2607	2647	Cytoplasm
COG000433	VtoE	7400	Apocrita	552509	Leptopilina boulardi filamentous virus	origin = eukaryotic	0.124887	100	97.9	INHIBITOR OF APOPTOSIS	0.9693	587	Inhibitor of Apoptosis domain	0.256711	596	604	Nucleus
COG000235	VtoE	3702	Arabidopsis thaliana	10239	Viruses	origin = virus	2.927e-06	root	root	PHOTOSYSTEM II PROTEIN D1	1	844	Photosystem II (PSII) is a light-driven water plastoquinone oxidoreductase that uses light energy to abstract electrons from H(2)O, generating O(2) and a proton gradient subsequently used for ATP formation	0.519651	916	916	Lysosome/Vacuole
COG005349	VtoE	3702	Arabidopsis thaliana	455363	unclassified Phycodnaviridae	origin = virus	3.24935	94.1	93.2	SI:CH211-59O9.10	0.2353	17	E3 ubiquitin-protein ligase	0.235294	17	20	Unknown
COG005855	VtoE	3702	Arabidopsis thaliana	1849335	Arabidopsis halleri partitivirus 1	origin = virus	0.430592	99.8	97.6	No annotation	0	0	no annotation	0	0	16	Unknown
COG006240	VtoE	3702	Arabidopsis thaliana	2732007	Nucleocytoviricota	origin = virus	2.37644	82.2	root	E3 UBIQUITIN-PROTEIN LIGASE PRAJA	0.3333	12	RING-H2 zinc finger domain	0.454545	11	13	Unknown
COG000030	VtoE	3702	Arabidopsis thaliana	2732523	Megaviricetes	origin = eukaryotic	0.648298	85.1	85.7	UBIQUITIN-CONJUGATING ENZYME E2	0.9944	3206	protein modification by small protein conjugation	0.406107	3275	3304	Unknown
COG002951	VtoE	3702	Arabidopsis thaliana	Weakly supported	Weakly supported	origin = virus, long branching recipient	3.2097	98.3	99.6	No annotation	0	0	FAR1 DNA-binding domain	0.744681	47	97	Nucleus
COG006201	VtoE	3702	Arabidopsis thaliana	Weakly supported	Weakly supported	origin = virus, sister unclear	0.404113	98.7	root	No annotation	0	0	no annotation	0	0	14	Extracellular
COG001518	VtoE	510516	Aspergillus oryzae RIB40	2732007	Nucleocytoviricota	origin = prokaryotic	1.09245	92.4	99.9	UDP-N-ACETYL-D-MANNOSAMINE DEHYDROGENASE	1	44	Belongs to the UDP-glucose GDP-mannose dehydrogenase family	0.590698	215	215	Unknown
COG004283	VtoE	510516	Aspergillus oryzae RIB40	Weakly supported	Weakly supported	origin = virus, long branching recipient	1.46401	87.8	100	CHITIN SYNTHASE	1	38	Chitin synthase	0.947368	38	40	Unknown
COG000195	VtoE	123757	Astrocoeniina	10239	Viruses	origin = unkn	0.502212	85.6	92	URACIL-DNA GLYCOSYLASE	0.9941	847	Excises uracil residues from the DNA which can arise as a result of misincorporation of dUMP residues by DNA polymerase or due to deamination of cytosine	0.505976	1004	1012	Unknown
COG000720	VtoE	44056	Aureococcus anophagefferens	10501	Phycodnaviridae	origin = eukaryotic	0.67445	82.4	91.6	FATTY ACID ACYL TRANSFERASE-RELATED	0.9976	414	GNS1/SUR4 family	0.298077	416	420	Endoplasmic_reticulum
COG004568	VtoE	44056	Aureococcus anophagefferens	10501	Phycodnaviridae	origin = virus	1.94216	98.9	root	GLYCOSYLTRANSFERASE-LIKE KOBITO 1	0.8889	9	spermidine synthase activity	0.925926	27	33	Cytoplasm
COG004947	VtoE	44056	Aureococcus anophagefferens	28883	Caudovirales	origin = virus	1.60217	84.3	root	HYPOXIA-INDUCIBLE FACTOR 1 ALPHA INHIBITOR-RELATED	1	1	nervous system development	0.5	2	26	Cell_membrane
COG000560	VtoE	44056	Aureococcus anophagefferens	455363	unclassified Phycodnaviridae	origin = eukaryotic	0.159842	97.4	93.4	PHOSPHATE TRANSPORTER	1	345	Sodium-phosphate symporter which plays a fundamental housekeeping role in phosphate transport	0.376754	499	507	Cell_membrane
COG000687	VtoE	44056	Aureococcus anophagefferens	455363	unclassified Phycodnaviridae	origin = eukaryotic	0.426367	91.9	88.6	IRON-SULFUR CLUSTER ASSEMBLY ENZYME NIFU HOMOLOG	0.9964	278	Scaffold protein for the de novo synthesis of iron- sulfur (Fe-S) clusters within mitochondria, which is required for maturation of both mitochondrial and cytoplasmic 2Fe-2S and 4Fe-4S proteins	0.367442	430	435	Mitochondrion
COG000776	VtoE	44056	Aureococcus anophagefferens	455363	unclassified Phycodnaviridae	origin = unkn	0.080002	96.9	99.9	ATP-BINDING TRANSPORT PROTEIN-RELATED	0.9886	351	ABC transporter	0.341598	363	394	Cytoplasm
COG000014	VtoE	44056	Aureococcus anophagefferens	2732007	Nucleocytoviricota	origin = eukaryotic	1.02807	80.6	95.5	DNAJ HOMOLOG SUBFAMILY C MEMBER	0.3541	3253	ATP binding to DnaK triggers the release of the substrate protein, thus completing the reaction cycle	0.315643	5747	5826	Extracellular
COG003017	VtoE	44056	Aureococcus anophagefferens	2732007	Nucleocytoviricota	origin = eukaryotic	0.189917	92.6	83.4	UNCHARACTERIZED	0.25	4	LMBR1-like membrane protein	0.625	8	91	Extracellular
COG004318	VtoE	44056	Aureococcus anophagefferens	2732007	Nucleocytoviricota	origin = unkn	0.658581	97.6	92.5	KDEL LYS-ASP-GLU-LEU CONTAINING - RELATED	1	19	glucosyltransferase activity	0.777778	36	39	Unknown
COG004933	VtoE	44056	Aureococcus anophagefferens	2732007	Nucleocytoviricota	origin = eukaryotic, cousin unclear	1.83612	83.1	root	HEXOSYLTRANSFERASE	1	1	Galactosyltransferase	0.5	8	26	Unknown
COG006766	VtoE	44056	Aureococcus anophagefferens	2732007	Nucleocytoviricota	origin = virus	2.58475	root	root	No annotation	0	0	no annotation	0	0	11	Extracellular
COG000367	VtoE	44056	Aureococcus anophagefferens	2732523	Megaviricetes	origin = eukaryotic	1.33496	87.9	91.2	ALPHA/BETA-HYDROLASES SUPERFAMILY PROTEIN	0.9199	537	Lipase (class 3)	0.37156	654	667	Extracellular
COG002758	VtoE	44056	Aureococcus anophagefferens	Weakly supported	Weakly supported	origin = virus, long branching recipient	2.27067	94.4	96.7	INITIATION-SPECIFIC ALPHA-1,6-MANNOSYLTRANSFERASE	0.5	2	Glycosyltransferase sugar-binding region containing DXD motif	0.5	2	110	Mitochondrion
COG003076	VtoE	44056	Aureococcus anophagefferens	Weakly supported	Weakly supported	origin = virus, long branching recipient	2.93123	87.9	100	TUBULIN POLYGLUTAMYLASE	1	79	Tubulin-tyrosine ligase family protein	0.265823	79	88	Mitochondrion
COG004911	VtoE	44056	Aureococcus anophagefferens	Weakly supported	Weakly supported	origin = virus, sister unclear	1.97944	83.2	86.7	No annotation	0	0	acetylcholine-gated cation-selective channel activity	0.666667	15	27	Nucleus
COG005486	VtoE	44056	Aureococcus anophagefferens	Weakly supported	Weakly supported	origin = virus, sister unclear	1.83216	98.8	root	No annotation	0	0	Glycosyltransferase family 92	0.625	8	19	Extracellular
COG000113	VtoE	3075	Auxenochlorella protothecoides	549779	Mimiviridae	origin = eukaryotic, cousin unclear	0.645488	88.6	82.7	UBIQUITIN	0.9609	1279	ubiquitin	0.414104	1333	1402	Unknown
COG000009	VtoE	33850	Bacillariophycidae	10487	Iridovirus	origin = unkn, cousin unclear	0.589337	82.2	84	CELL DIVISION PROTEIN KINASE	0.4861	7181	Belongs to the protein kinase superfamily	0.127773	7302	7369	Cytoplasm
COG000538	VtoE	33850	Bacillariophycidae	2732007	Nucleocytoviricota	origin = virus	0.805818	90.5	root	COLD SHOCK DOMAIN CONTAINING PROTEINS	0.6569	478	Cold shock protein domain	0.266033	421	526	Nucleus
COG003583	VtoE	33850	Bacillariophycidae	Weakly supported	Weakly supported	origin = virus, sister unclear	1.12151	97.4	root	CHLOROPHYLL SYNTHASE	1	53	Catalyzes the prenylation of para-hydroxybenzoate (PHB) with an all-trans polyprenyl group	0.383333	60	63	Plastid
COG000280	VtoE	2836	Bacillariophyta	1977639	Klosneuvirus	origin = unkn	0.19137	96.6	100	ASPARTYL/LYSYL-TRNA SYNTHETASE	0.9961	515	tRNA synthetases class II (D, K and N)	0.219725	801	807	Cytoplasm
COG000743	VtoE	2836	Bacillariophyta	2732007	Nucleocytoviricota	origin = eukaryotic	0.428064	96.2	80.7	PHOSPHOSERINE AMINOTRANSFERASE	0.9755	245	Catalyzes the reversible conversion of 3- phosphohydroxypyruvate to phosphoserine and of 3-hydroxy-2-oxo-4- phosphonooxybutanoate to phosphohydroxythreonine	0.441624	394	406	Cytoplasm
COG000793	VtoE	2836	Bacillariophyta	2732007	Nucleocytoviricota	origin = eukaryotic, cousin unclear	1.04968	82.3	95.7	RING FINGER AND CHY ZINC FINGER DOMAIN-CONTAINING PROTEIN 1	0.9948	383	Zinc-ribbon	0.205729	384	388	Nucleus
COG003115	VtoE	2836	Bacillariophyta	2732007	Nucleocytoviricota	origin = virus	0.40141	96.4	root	METHYLTRANSFERASE	0.9688	32	Methyltransferase domain	0.987179	78	86	Extracellular
COG007327	VtoE	2836	Bacillariophyta	2732523	Megaviricetes	origin = virus	0.516501	root	root	No annotation	0	0	no annotation	0	0	9	Unknown
COG000639	VtoE	41875	Bathycoccus prasinos	2732007	Nucleocytoviricota	origin = unkn, cousin unclear	0.675274	82.5	84	ZINC FINGER CCHC DOMAIN CONTAINING PROTEIN	0.7778	18	zinc finger	0.854881	379	461	Nucleus
COG004725	VtoE	41875	Bathycoccus prasinos	Weakly supported	Weakly supported	origin = virus, sister unclear	0.327573	94.2	root	No annotation	0	0	no annotation	0	0	30	Unknown
COG005843	VtoE	684364	Batrachochytrium dendrobatidis JAM81	Weakly supported	Weakly supported	origin = virus, sister unclear	0.683048	84.2	root	UPSTREAM BINDING TRANSCRIPTION FACTOR	0.5	2	YABBY protein	1	3	16	Extracellular
COG000531	VtoE	227086	Bigelowiella natans	10239	Viruses	origin = virus	0.873825	95.8	87	UBIQUITIN	0.6667	3	ubiquitin	1	2	532	Nucleus
COG001350	VtoE	227086	Bigelowiella natans	10239	Viruses	origin = virus	1.53073	95.9	87.8	TRNA(ILE)-LYSIDINE SYNTHASE-RELATED	1	230	tRNA processing	0.482759	232	244	Unknown
COG002444	VtoE	227086	Bigelowiella natans	10239	Viruses	origin = virus	1.39183	80.4	90.9	CYTOSINE DEAMINASE FAMILY MEMBER	0.6667	3	MafB19-like deaminase	0.333333	6	139	Mitochondrion
COG003044	VtoE	227086	Bigelowiella natans	10239	Viruses	origin = eukaryotic, cousin unclear	2.42117	91.4	97.8	ISOCITRATE DEHYDROGENASE [NADP]	1	1	no annotation	0	0	90	Unknown
COG003447	VtoE	227086	Bigelowiella natans	10239	Viruses	origin = eukaryotic, cousin unclear	1.01242	82.2	90.9	DEPHOSPHO-COA KINASE-RELATED	1	30	Protein of unknown function (DUF3431)	0.984127	63	68	Unknown
COG003726	VtoE	227086	Bigelowiella natans	10239	Viruses	origin = virus	2.40276	85.1	99.2	HISTONE H3 METHYLTRANSFERASE	0.8182	11	Histone methylation protein DOT1	0.564103	39	57	Mitochondrion
COG006533	VtoE	227086	Bigelowiella natans	10239	Viruses	origin = virus	0.509361	86.2	root	No annotation	0	0	no annotation	0	0	12	Cytoplasm
COG004330	VtoE	227086	Bigelowiella natans	10487	Iridovirus	origin = virus	1.5207	82.7	89.8	No annotation	0	0	no annotation	0	0	39	Unknown
COG001328	VtoE	227086	Bigelowiella natans	10501	Phycodnaviridae	origin = prokaryotic	0.581713	89.3	99.7	B6	0.5	4	HemY domain protein	0.162037	216	248	Extracellular
COG001669	VtoE	227086	Bigelowiella natans	10501	Phycodnaviridae	origin = eukaryotic, cousin unclear	1.53432	97.8	91.3	No annotation	0	0	PFAM glycosyl transferase family 9	0.842391	184	197	Nucleus
COG005890	VtoE	227086	Bigelowiella natans	10501	Phycodnaviridae	origin = virus	2.16811	87	root	No annotation	0	0	no annotation	0	0	15	Extracellular
COG001877	VtoE	227086	Bigelowiella natans	455363	unclassified Phycodnaviridae	origin = eukaryotic	1.16438	94.5	93.3	MITOCHONDRIAL SUBSTRATE/SOLUTE CARRIER	1	174	Mitochondrial carrier protein	0.649123	171	176	Mitochondrion
COG002275	VtoE	227086	Bigelowiella natans	455363	unclassified Phycodnaviridae	origin = virus, cousin unclear	1.78815	84	90.9	ABC TRANSPORTER ABCH.3	0.735	117	bis(5'-nucleosyl)-tetraphosphatase (symmetrical) activity	0.970149	134	151	Cytoplasm
COG005785	VtoE	227086	Bigelowiella natans	455363	unclassified Phycodnaviridae	origin = virus	2.05178	95.1	root	EXONUCLEASE, PHAGE-TYPE/RECB, C-TERMINAL DOMAIN-CONTAINING PROTEIN	1	15	YqaJ-like viral recombinase domain	1	15	16	Mitochondrion
COG005785	VtoE	227086	Bigelowiella natans	455363	unclassified Phycodnaviridae	origin = virus	2.91631	95.1	root	EXONUCLEASE, PHAGE-TYPE/RECB, C-TERMINAL DOMAIN-CONTAINING PROTEIN	1	15	YqaJ-like viral recombinase domain	1	15	16	Extracellular
COG004269	VtoE	227086	Bigelowiella natans	549779	Mimiviridae	origin = unkn	1.18592	98.9	92	ALPHA-PROTEIN KINASE VWKA	0.7727	22	protein polyubiquitination	0.72973	37	40	Unknown
COG000993	VtoE	227086	Bigelowiella natans	573012	Raphidovirus	origin = unkn, cousin unclear	1.08199	86.7	93.8	No annotation	0	0	no annotation	0	0	329	Nucleus
COG002275	VtoE	227086	Bigelowiella natans	985780	unclassified Mimiviridae	origin = unkn	1.42742	94.3	95.4	ABC TRANSPORTER ABCH.3	0.735	117	bis(5'-nucleosyl)-tetraphosphatase (symmetrical) activity	0.970149	134	151	Unknown
COG000715	VtoE	227086	Bigelowiella natans	1982086	Laroyevirus	origin = eukaryotic	1.31267	82.5	95	DNA ANNEALING HELICASE AND ENDONUCLEASE ZRANB3 FAMILY MEMBER	1	410	annealing helicase activity	0.178744	414	421	Mitochondrion
COG003892	VtoE	227086	Bigelowiella natans	2023203	Pithoviridae	origin = unkn	0.684808	99.7	99.3	No annotation	0	0	no annotation	0	0	50	Endoplasmic_reticulum
COG000727	VtoE	227086	Bigelowiella natans	2487775	Terrestrivirus sp.	origin = eukaryotic	1.27951	95.2	89.9	SYNTAXIN	0.9951	410	SNAP receptor activity	0.378973	409	416	Endoplasmic_reticulum
COG000164	VtoE	227086	Bigelowiella natans	2732007	Nucleocytoviricota	origin = virus	1.05775	92.9	97.6	MRNA GUANINE-7- METHYLTRANSFERASE	0.9712	1008	mRNA (guanine-N7-)-methyltransferase activity	0.755814	1032	1114	Nucleus
COG000280	VtoE	227086	Bigelowiella natans	2732007	Nucleocytoviricota	origin = unkn, cousin unclear	0.421333	96.2	89	ASPARTYL/LYSYL-TRNA SYNTHETASE	0.9961	515	tRNA synthetases class II (D, K and N)	0.219725	801	807	Cytoplasm
COG000639	VtoE	227086	Bigelowiella natans	2732007	Nucleocytoviricota	origin = eukaryotic	0.665703	88.5	80.1	ZINC FINGER CCHC DOMAIN CONTAINING PROTEIN	0.7778	18	zinc finger	0.854881	379	461	Unknown
COG001220	VtoE	227086	Bigelowiella natans	2732007	Nucleocytoviricota	origin = eukaryotic	0.321602	92.1	82.9	UDP-GALACTOPYRANOSE MUTASE	1	119	UDP-galactopyranose mutase	0.799257	269	270	Cytoplasm
COG001538	VtoE	227086	Bigelowiella natans	2732007	Nucleocytoviricota	origin = unkn	1.50967	90.6	85.4	EXPRESSED PROTEIN	0.9592	98	Protein of unknown function (DUF3431)	0.87766	188	213	Unknown
COG002028	VtoE	227086	Bigelowiella natans	2732007	Nucleocytoviricota	origin = prokaryotic	0.80983	86.7	82.9	TRANSFERASE, PUTATIVE-RELATED	0.7826	23	Methyltransferase domain	0.784314	153	163	Plastid
COG002979	VtoE	227086	Bigelowiella natans	2732007	Nucleocytoviricota	origin = virus	0.763766	92.7	86.5	No annotation	0	0	function	1	10	95	Endoplasmic_reticulum
COG003324	VtoE	227086	Bigelowiella natans	2732007	Nucleocytoviricota	origin = virus	1.29327	98.2	83.2	MITOCHONDRIAL BASIC AMINO ACIDS TRANSPORTER-RELATED	0.9853	68	Belongs to the mitochondrial carrier (TC 2	0.558824	68	74	Mitochondrion
COG003689	VtoE	227086	Bigelowiella natans	2732007	Nucleocytoviricota	origin = virus	1.38582	81.9	86.9	5'->3' EXORIBONUCLEASE	0.5	2	Poly A polymerase regulatory subunit	0.981132	53	58	Nucleus
COG004130	VtoE	227086	Bigelowiella natans	2732007	Nucleocytoviricota	origin = unkn	0.751675	99.1	92.4	UNCHARACTERIZED	0.8462	13	Glycosyl transferase, family 2	0.555556	9	43	Cytoplasm
COG004750	VtoE	227086	Bigelowiella natans	2732007	Nucleocytoviricota	origin = virus	3.54584	85.4	root	RING FINGER AND PROTEASE ASSOCIATED DOMAIN-CONTAINING	0.44	25	RING-like zinc finger	0.238095	21	29	Extracellular
COG006868	VtoE	227086	Bigelowiella natans	2732007	Nucleocytoviricota	origin = virus	2.18791	83.7	94.4	RING FINGER DOMAIN-CONTAINING	0.6667	3	E3 ubiquitin-protein ligase	0.5	2	10	Nucleus
COG000379	VtoE	227086	Bigelowiella natans	2732523	Megaviricetes	origin = unkn	0.639645	91.8	94.4	EBNA2 BINDING PROTEIN P100	1	233	Staphylococcal nuclease homologue	0.806641	512	650	Unknown
COG003045	VtoE	227086	Bigelowiella natans	2732523	Megaviricetes	origin = virus	0.631625	82.6	91	No annotation	0	0	identical protein binding	1	5	90	Unknown
COG003192	VtoE	227086	Bigelowiella natans	2732523	Megaviricetes	origin = virus	1.33617	94.7	root	PTHR40743	1	34	Exostosin family	0.925926	54	82	Nucleus
COG007629	VtoE	227086	Bigelowiella natans	2732523	Megaviricetes	origin = virus	1.43619	97.4	root	No annotation	0	0	no annotation	0	0	8	Endoplasmic_reticulum
COG000031	VtoE	227086	Bigelowiella natans	Weakly supported	Weakly supported	origin = virus, long branching recipient	1.14039	82.1	83	REGULATOR OF CHROMOSOME CONDENSATION	0.5	4	Large eukaryotic DNA virus major capsid protein	0.999061	3194	3272	Cytoplasm
COG000045	VtoE	227086	Bigelowiella natans	Weakly supported	Weakly supported	origin = unkn, long branching recipient	1.05063	90	92.3	DNA POLYMERASE CATALYTIC SUBUNIT	0.9057	2090	3'-5' exonuclease activity	0.66927	2561	2589	Unknown
COG000045	VtoE	227086	Bigelowiella natans	Weakly supported	Weakly supported	origin = unkn, long branching recipient	0.911445	83.6	93.2	DNA POLYMERASE CATALYTIC SUBUNIT	0.9057	2090	3'-5' exonuclease activity	0.66927	2561	2589	Nucleus
COG000048	VtoE	227086	Bigelowiella natans	Weakly supported	Weakly supported	origin = unkn, long branching recipient	1.52131	84.8	95.2	RIBONUCLEOSIDE-DIPHOSPHATE REDUCTASE LARGE CHAIN	0.9955	2244	Provides the precursors necessary for DNA synthesis	0.506765	2439	2481	Nucleus
COG000068	VtoE	227086	Bigelowiella natans	Weakly supported	Weakly supported	origin = unkn, long branching recipient	1.09584	88	91.8	RIBONUCLEOSIDE-DIPHOSPHATE REDUCTASE SMALL CHAIN	0.9972	1762	Ribonucleotide reductase, small chain	0.392931	1924	1961	Unknown
COG000068	VtoE	227086	Bigelowiella natans	Weakly supported	Weakly supported	origin = unkn, long branching recipient	0.945051	96.1	88.3	RIBONUCLEOSIDE-DIPHOSPHATE REDUCTASE SMALL CHAIN	0.9972	1762	Ribonucleotide reductase, small chain	0.392931	1924	1961	Mitochondrion
COG000101	VtoE	227086	Bigelowiella natans	Weakly supported	Weakly supported	origin = virus, long branching recipient	1.25991	88	99.4	PHOSPHORYN, PUTATIVE-RELATED-RELATED	1	1	adenyl ribonucleotide binding	0.989933	1490	1535	Cytoplasm
COG000149	VtoE	227086	Bigelowiella natans	Weakly supported	Weakly supported	origin = virus, long branching donor	1.10526	96.4	93.4	EXONUCLEASE, PHAGE-TYPE/RECB, C-TERMINAL DOMAIN-CONTAINING PROTEIN	1	970	induction by virus of catabolism of host mRNA	0.993601	1094	1147	Nucleus
COG000171	VtoE	227086	Bigelowiella natans	Weakly supported	Weakly supported	origin = virus, long branching donor	0.989258	89.3	92.7	ANNEXIN	0.8244	968	lipid catabolic process	0.714149	1046	1084	Unknown
COG000236	VtoE	227086	Bigelowiella natans	Weakly supported	Weakly supported	origin = virus, long branching recipient	0.939893	84.5	82.3	EUKARYOTIC TRANSLATION INITIATION FACTOR 4E RELATED	1	839	translation initiation factor activity	0.395514	847	913	Nucleus
COG000404	VtoE	227086	Bigelowiella natans	Weakly supported	Weakly supported	origin = virus, long branching recipient	1.90359	81.2	81.3	L-FUCOSYLTRANSFERASE	0.625	8	Glycosyltransferase family 25 (LPS biosynthesis protein)	0.850168	594	627	Nucleus
COG000892	VtoE	227086	Bigelowiella natans	Weakly supported	Weakly supported	origin = virus, long branching recipient	4.17361	90.4	95.7	RING FINGER DOMAIN-CONTAINING	0.3211	109	RING-H2 finger protein	0.354839	93	358	Nucleus
COG003121	VtoE	227086	Bigelowiella natans	Weakly supported	Weakly supported	origin = virus, sister unclear	1.29015	99.5	root	No annotation	0	0	Protein of unknown function (DUF1073)	1	1	86	Cytoplasm
COG003614	VtoE	227086	Bigelowiella natans	Weakly supported	Weakly supported	origin = virus, long branching recipient	1.83692	89.9	99.9	DNA ANNEALING HELICASE AND ENDONUCLEASE ZRANB3 FAMILY MEMBER	0.8	30	Psort location Cytoplasmic, score 8	0.681818	22	61	Mitochondrion
COG004926	VtoE	227086	Bigelowiella natans	Weakly supported	Weakly supported	origin = virus, long branching recipient	4.47878	root	root	EUKARYOTIC TRANSLATION INITIATION FACTOR	0.9583	24	translation initiation factor activity	0.653846	26	26	Nucleus
COG005614	VtoE	227086	Bigelowiella natans	Weakly supported	Weakly supported	origin = virus, sister unclear	1.36746	84.6	root	ALPHA-1,6-MANNOSYLTRANSFERASE MNN11-RELATED	1	7	Galactomannan galactosyltransferase	0.5	4	18	Extracellular
COG005934	VtoE	227086	Bigelowiella natans	Weakly supported	Weakly supported	origin = virus, sister unclear	1.67281	84.5	root	COLLAGEN ALPHA	1	1	beta-galactosidase activity	0.666667	3	15	Unknown
COG007688	VtoE	227086	Bigelowiella natans	Weakly supported	Weakly supported	origin = virus, sister unclear	1.64701	82.6	root	No annotation	0	0	no annotation	0	0	8	Nucleus
COG000043	VtoE	33213	Bilateria	10239	Viruses	origin = unkn, cousin unclear	0.188423	87.8	86.4	THYMIDYLATE SYNTHASE 1	0.701	2381	Thymidylate synthase	0.35328	2607	2647	Cytoplasm
COG000038	VtoE	33213	Bilateria	Weakly supported	Weakly supported	origin = unkn, long branching recipient	2.25077	97.8	99.4	DNA-DIRECTED RNA POLYMERASE	0.9996	2582	DNA-dependent RNA polymerase catalyzes the transcription of DNA into RNA using the four ribonucleoside triphosphates as substrates	0.704619	2793	2889	Mitochondrion
COG000019	VtoE	6526	Biomphalaria glabrata	549779	Mimiviridae	origin = eukaryotic	0.718322	84.9	96.4	HEAT SHOCK PROTEIN 70KDA	0.8288	3895	Belongs to the heat shock protein 70 family	0.27064	4530	4585	Cytoplasm
COG000014	VtoE	6526	Biomphalaria glabrata	Weakly supported	Weakly supported	origin = eukaryotic, long branching recipient	2.55143	89.8	87.4	DNAJ HOMOLOG SUBFAMILY C MEMBER	0.3541	3253	ATP binding to DnaK triggers the release of the substrate protein, thus completing the reaction cycle	0.315643	5747	5826	Nucleus
COG000095	VtoE	6526	Biomphalaria glabrata	Weakly supported	Weakly supported	origin = virus, long branching recipient	1.20009	99.1	87.2	DNA POLYMERASE CATALYTIC SUBUNIT	1	1438	DNA polymerase family B	0.952317	1489	1582	Unknown
COG001024	VtoE	12968	Blastocystis hominis	455363	unclassified Phycodnaviridae	origin = eukaryotic	1.28138	96.8	95.1	UNCHARACTERIZED PUTATIVE METHYLTRANSFERASE	1	299	peptidyl-lysine monomethylation	0.410423	307	317	Unknown
COG000045	VtoE	12968	Blastocystis hominis	Weakly supported	Weakly supported	origin = eukaryotic, long branching recipient	2.27144	96	88.9	DNA POLYMERASE CATALYTIC SUBUNIT	0.9057	2090	3'-5' exonuclease activity	0.66927	2561	2589	Nucleus
COG000108	VtoE	75058	Bodo saltans	10239	Viruses	origin = eukaryotic, cousin unclear	0.855322	83	98.1	DNA POLYMERASE TYPE-X FAMILY MEMBER	0.7341	1245	DNA ligase (NAD+) activity	0.532909	1413	1460	Unknown
COG005962	VtoE	75058	Bodo saltans	2732005	Bamfordvirae	origin = virus	1.6293	95.3	root	No annotation	0	0	no annotation	0	0	15	Cytoplasm
COG000429	VtoE	75058	Bodo saltans	2732007	Nucleocytoviricota	origin = unkn	1.4227	93.1	98	NHL REPEAT-CONTAINING PROTEIN 2	0.8098	326	NHL repeat	0.219224	593	606	Extracellular
COG000845	VtoE	75058	Bodo saltans	2732555	Pimascovirales	origin = virus	1.16075	90.7	81.8	PTHR47810	0.9944	355	DNA ligase (ATP) activity	0.924119	369	371	Unknown
COG004067	VtoE	75058	Bodo saltans	Weakly supported	Weakly supported	origin = unkn, long branching recipient	3.55129	80.2	88.2	No annotation	0	0	no annotation	0	0	45	Golgi_apparatus
COG004151	VtoE	75058	Bodo saltans	Weakly supported	Weakly supported	origin = virus, sister unclear	0.612197	86.9	95.1	D123 PROTEIN	1	2	D123	0.666667	6	43	Unknown
COG000056	VtoE	7739	Branchiostoma floridae	Weakly supported	Weakly supported	origin = virus, sister unclear	1.26195	86.1	94.5	EXPRESSED PROTEIN	1	1	ATPase activity, uncoupled	0.985007	2201	2227	Nucleus
COG000235	VtoE	3708	Brassica napus	10239	Viruses	origin = virus	2.927e-06	root	root	PHOTOSYSTEM II PROTEIN D1	1	844	Photosystem II (PSII) is a light-driven water plastoquinone oxidoreductase that uses light energy to abstract electrons from H(2)O, generating O(2) and a proton gradient subsequently used for ATP formation	0.519651	916	916	Unknown
COG000055	VtoE	3708	Brassica napus	Weakly supported	Weakly supported	origin = eukaryotic, long branching recipient	0.858108	81.7	93.3	DNA TOPOISOMERASE/GYRASE	0.9857	2162	Control of topological states of DNA by transient breakage and subsequent rejoining of DNA strands	0.471552	2197	2268	Cytoplasm
COG000139	VtoE	3708	Brassica napus	Weakly supported	Weakly supported	origin = eukaryotic, long branching recipient	1.7921	97.5	96.6	DTDP-D-GLUCOSE 4,6-DEHYDRATASE-RELATED	0.7699	969	dTDP-glucose 4,6-dehydratase activity	0.372171	1193	1220	Nucleus
COG000528	VtoE	3708	Brassica napus	Weakly supported	Weakly supported	origin = eukaryotic, long branching recipient	2.77393	86.3	97.9	METHIONINE AMINOPEPTIDASE 2	1	325	Removes the N-terminal methionine from nascent proteins	0.490566	530	533	Nucleus
COG003403	VtoE	3700	Brassicaceae	2080462	Oxybasis rubra mitovirus 1	origin = unkn	0.38564	100	92.1	PTHR34456	1	64	BEST Arabidopsis thaliana protein match is Mitovirus RNA-dependent RNA polymerase (TAIR	0.515152	66	70	Mitochondrion
COG000262	VtoE	6239	Caenorhabditis elegans	10239	Viruses	origin = virus, cousin unclear	1.32757	92.7	93	UNCHARACTERIZED	0.9985	663	FtsJ-like methyltransferase	0.654919	681	856	Cytoplasm
COG001101	VtoE	6239	Caenorhabditis elegans	10239	Viruses	origin = prokaryotic	1.24836	90.1	99.7	OROTATE PHOSPHORIBOSYLTRANSFERASE	0.8513	195	Orotidine 5'-phosphate decarboxylase / HUMPS family	0.258741	286	294	Unknown
COG000482	VtoE	6239	Caenorhabditis elegans	10662	Myoviridae	origin = unkn	1.36601	93.7	88.9	RIBONUCLEASE H1	0.9981	530	Endonuclease that specifically degrades the RNA of RNA- DNA hybrids	0.539162	549	565	Unknown
COG000043	VtoE	6239	Caenorhabditis elegans	346673	Coccolithovirus	origin = unkn, cousin unclear	0.323315	91.7	94.1	THYMIDYLATE SYNTHASE 1	0.701	2381	Thymidylate synthase	0.35328	2607	2647	Cytoplasm
COG000079	VtoE	6239	Caenorhabditis elegans	Weakly supported	Weakly supported	origin = eukaryotic, long branching donor	0.741708	92.9	92.6	DUAL SPECIFICITY PROTEIN KINASE	0.7051	1760	Protein tyrosine kinase	0.126476	1779	1799	Nucleus
COG000115	VtoE	6239	Caenorhabditis elegans	Weakly supported	Weakly supported	origin = eukaryotic, long branching recipient	1.11836	92.1	87.1	ASPARAGINE SYNTHETASE	0.9916	1072	Aluminium induced protein	0.208791	1365	1386	Cytoplasm
COG001454	VtoE	6239	Caenorhabditis elegans	Weakly supported	Weakly supported	origin = unkn, long branching recipient	2.80283	89.9	93.8	NAD DEPENDENT EPIMERASE/DEHYDRATASE	0.9954	217	steroid biosynthetic process	0.597345	226	226	Unknown
COG000087	VtoE	595528	Capsaspora owczarzaki ATCC 30864	10239	Viruses	origin = virus, cousin unclear	0.764244	98.2	81.4	ATP BINDING PROTEIN-RELATED	0.9993	1453	D5 N terminal like	0.970588	1530	1632	Cytoplasm
COG003240	VtoE	595528	Capsaspora owczarzaki ATCC 30864	455363	unclassified Phycodnaviridae	origin = eukaryotic, cousin unclear	0.301966	93.8	99.9	CYTOCHROME P450 26	1	76	Belongs to the cytochrome P450 family	0.291139	79	79	Unknown
COG005469	VtoE	595528	Capsaspora owczarzaki ATCC 30864	2732007	Nucleocytoviricota	origin = unkn	2.12732	86.6	90.2	No annotation	0	0	SET (Su(var)3-9, Enhancer-of-zeste, Trithorax) domain	1	12	19	Nucleus
COG002872	VtoE	595528	Capsaspora owczarzaki ATCC 30864	2732523	Megaviricetes	origin = virus	1.32039	92	90.1	PTHR47112	1	27	no annotation	0	0	102	Cytoplasm
COG000529	VtoE	595528	Capsaspora owczarzaki ATCC 30864	Weakly supported	Weakly supported	origin = virus, long branching recipient	3.14448	88.5	85.9	No annotation	0	0	to Hypothetical protein CBG24020	1	14	533	Nucleus
COG000767	VtoE	1054147	Cavenderia fasciculata SH3	455363	unclassified Phycodnaviridae	origin = prokaryotic, cousin unclear	0.899827	91.1	86	COLLAGEN ALPHA	0.3333	3	Phage Tail Collar Domain	0.366667	390	397	Unknown
COG005258	VtoE	1054147	Cavenderia fasciculata SH3	2732523	Megaviricetes	origin = virus	2.97092	85.6	root	SERINE/THREONINE-PROTEIN KINASE UNC-51-RELATED	0.3333	21	belongs to the protein kinase superfamily	0.238095	21	21	Cytoplasm
COG000001	VtoE	1054147	Cavenderia fasciculata SH3	Weakly supported	Weakly supported	origin = eukaryotic, long branching recipient	1.79603	90.3	84.6	SERINE/THREONINE-PROTEIN KINASE	0.2995	16718	protein serine/threonine kinase activity	0.191391	17075	17289	Cytoplasm
COG000827	VtoE	3042	Chlamydomonadales	340016	uncultured virus	origin = prokaryotic	0.42321	95.1	91.8	VITAMIN B12-DEPENDENT RIBONUCLEOTIDE REDUCTASE	1	222	ribonucleoside-diphosphate reductase activity	0.338667	375	375	Mitochondrion
COG000217	VtoE	3042	Chlamydomonadales	455363	unclassified Phycodnaviridae	origin = virus	1.11839	97.8	93.8	DNA ANNEALING HELICASE AND ENDONUCLEASE ZRANB3 FAMILY MEMBER	0.8427	375	N-methyltransferase activity	0.971363	873	950	Nucleus
COG000087	VtoE	3042	Chlamydomonadales	Weakly supported	Weakly supported	origin = virus, long branching donor	0.347016	99	91.6	ATP BINDING PROTEIN-RELATED	0.9993	1453	D5 N terminal like	0.970588	1530	1632	Cytoplasm
COG000358	VtoE	3042	Chlamydomonadales	Weakly supported	Weakly supported	origin = virus, sister unclear	0.710313	83.6	83.3	DNA POLYMERASE III SUBUNIT EPSILON	0.9941	170	Exonuclease	0.488525	610	678	Cytoplasm
COG000810	VtoE	3055	Chlamydomonas reinhardtii	985780	unclassified Mimiviridae	origin = eukaryotic	0.798694	82	94.3	CAMK FAMILY PROTEIN KINASE	0.5	6	Domain of unknown function (DUF1768)	0.542781	374	381	Nucleus
COG010315	VtoE	3055	Chlamydomonas reinhardtii	1450746	Pithovirus sibericum	origin = virus	1.68248	91.4	root	No annotation	0	0	no annotation	0	0	4	Unknown
COG001208	VtoE	3055	Chlamydomonas reinhardtii	Weakly supported	Weakly supported	origin = virus, long branching recipient	1.41362	91.4	83.6	STRUCTURE-SPECIFIC ENDONUCLEASE SUBUNIT SLX1	1	252	Catalytic subunit of the slx1-slx4 structure-specific endonuclease that resolves DNA secondary structures generated during DNA repair and recombination	0.313901	223	272	Nucleus
COG002311	VtoE	2511126	Chlorella clade	2732523	Megaviricetes	origin = virus, cousin unclear	0.711821	94.9	92.6	PROCOLLAGEN-LYSINE,2-OXOGLUTARATE 5-DIOXYGENASE/GLYCOSYLTRANSFERASE 25 FAMILY MEMBER	1	48	Glycosyltransferase family 25 (LPS biosynthesis protein)	0.259259	135	149	Unknown
COG004059	VtoE	2511126	Chlorella clade	Weakly supported	Weakly supported	origin = virus, long branching donor	0.361949	94.3	99.7	PTHR40124	0.9762	42	Alginate lyase	0.863636	44	45	Nucleus
COG000630	VtoE	3076	Chlorella sorokiniana	Weakly supported	Weakly supported	origin = eukaryotic, long branching recipient	2.80678	92.7	84.5	SUCCINATE DEHYDROGENASE IRON-SULFUR PROTEIN	0.9934	303	Iron-sulfur protein (IP) subunit of succinate dehydrogenase (SDH) that is involved in complex II of the mitochondrial electron transport chain and is responsible for transferring electrons from succinate to ubiquinone (coenzyme Q)	0.442266	459	468	Extracellular
COG000121	VtoE	554065	Chlorella variabilis	Weakly supported	Weakly supported	origin = prokaryotic, long branching recipient	1.22943	96	89.5	DNA POLYMERASE I	0.8711	380	In addition to polymerase activity, this DNA polymerase exhibits 5'-3' exonuclease activity	0.707478	1364	1366	Cytoplasm
COG004418	VtoE	7777	Chondrichthyes	Weakly supported	Weakly supported	origin = unkn, long branching donor	0.7947	84.4	86.4	ACETYL, PROPIONYL, PYRUVATE, AND GLUTACONYL CARBOXYLASE-RELATED	1	1	US22 like	1	36	37	Cytoplasm
COG000165	VtoE	2769	Chondrus crispus	10239	Viruses	origin = virus	0.723297	86.4	84.5	TRANSCRIPTION FACTOR S-II ZINC FINGER DOMAIN-CONTAINING PROTEIN	1	934	Transcription factor S-II (TFIIS)	0.307116	1068	1112	Extracellular
COG000235	VtoE	2769	Chondrus crispus	Weakly supported	Weakly supported	origin = virus, long branching recipient	0.0508373	root	root	PHOTOSYSTEM II PROTEIN D1	1	844	Photosystem II (PSII) is a light-driven water plastoquinone oxidoreductase that uses light energy to abstract electrons from H(2)O, generating O(2) and a proton gradient subsequently used for ATP formation	0.519651	916	916	Unknown
COG000523	VtoE	2769	Chondrus crispus	Weakly supported	Weakly supported	origin = unkn, long branching recipient	1.64677	93.7	84.7	RIBONUCLEASE H1	1	267	Endonuclease that specifically degrades the RNA of RNA- DNA hybrids	0.740602	532	536	Nucleus
COG001124	VtoE	2769	Chondrus crispus	Weakly supported	Weakly supported	origin = virus, long branching recipient	2.25163	92.9	86.5	No annotation	0	0	Domain of unknown function (DUF4338)	0.9	10	291	Nucleus
COG002425	VtoE	2769	Chondrus crispus	Weakly supported	Weakly supported	origin = virus, long branching recipient	3.75348	85.6	98.6	No annotation	0	0	Viral RNA-directed RNA-polymerase	0.782609	138	141	Peroxisome
COG000703	VtoE	7711	Chordata	Weakly supported	Weakly supported	origin = unkn, long branching donor	0.493749	99	95.1	ADENINE PHOSPHORIBOSYLTRANSFERASE	0.989	273	Catalyzes a salvage reaction resulting in the formation of AMP, that is energically less costly than de novo synthesis	0.359155	426	428	Cytoplasm
COG000139	VtoE	1460289	Chrysochromulina tobinii	10239	Viruses	origin = eukaryotic	0.501644	94.7	97.4	DTDP-D-GLUCOSE 4,6-DEHYDRATASE-RELATED	0.7699	969	dTDP-glucose 4,6-dehydratase activity	0.372171	1193	1220	Peroxisome
COG000183	VtoE	1460289	Chrysochromulina tobinii	10501	Phycodnaviridae	origin = unkn	0.47499	98.9	85.9	DEOXYNUCLEOSIDE KINASE	0.997	1005	Deoxynucleoside kinase	0.522124	1017	1047	Cytoplasm
COG004676	VtoE	1460289	Chrysochromulina tobinii	10501	Phycodnaviridae	origin = virus	1.52173	90	root	GLYCOGENIN SUBFAMILY MEMBER	1	10	transferase activity, transferring glycosyl groups	0.9	10	31	Nucleus
COG002429	VtoE	1460289	Chrysochromulina tobinii	181086	Prymnesiovirus	origin = prokaryotic	0.386536	94.5	99.4	PTHR35609	1	65	response to abiotic stimulus	0.5	2	140	Cytoplasm
COG000560	VtoE	1460289	Chrysochromulina tobinii	346673	Coccolithovirus	origin = eukaryotic	0.495707	99.8	95	PHOSPHATE TRANSPORTER	1	345	Sodium-phosphate symporter which plays a fundamental housekeeping role in phosphate transport	0.376754	499	507	Unknown
COG003170	VtoE	1460289	Chrysochromulina tobinii	455363	unclassified Phycodnaviridae	origin = eukaryotic, cousin unclear	1.09767	90.8	90.5	No annotation	0	0	no annotation	0	0	83	Endoplasmic_reticulum
COG004215	VtoE	1460289	Chrysochromulina tobinii	2080449	Acanthamoeba castellanii medusavirus	origin = unkn	1.29983	94.3	82.5	PROTEIN C6ORF130	0.9	10	Domain of unknown function (DUF1768)	0.75	8	41	Nucleus
COG001085	VtoE	1460289	Chrysochromulina tobinii	2732007	Nucleocytoviricota	origin = prokaryotic, cousin unclear	1.54229	86.6	82.3	No annotation	0	0	cephalosporin hydroxylase	0.764706	289	299	Unknown
COG001274	VtoE	1460289	Chrysochromulina tobinii	2732007	Nucleocytoviricota	origin = unkn	0.946237	92.2	95.3	RIBITOL-5-PHOSPHATE XYLOSYLTRANSFERASE 1	0.8384	99	Haloacid dehalogenase-like hydrolase	0.357143	14	258	Unknown
COG002014	VtoE	1460289	Chrysochromulina tobinii	2732007	Nucleocytoviricota	origin = unkn	1.51802	87.8	89.2	MANNOSYL PHOSPHORYLINOSITOL CERAMIDE SYNTHASE	0.9744	39	Capsular polysaccharide synthesis protein	0.987261	157	164	Cytoplasm
COG007327	VtoE	1460289	Chrysochromulina tobinii	2732523	Megaviricetes	origin = eukaryotic	2.19285	root	root	No annotation	0	0	no annotation	0	0	9	Unknown
COG001538	VtoE	1460289	Chrysochromulina tobinii	Weakly supported	Weakly supported	origin = virus, sister unclear	1.24082	97.2	89.7	EXPRESSED PROTEIN	0.9592	98	Protein of unknown function (DUF3431)	0.87766	188	213	Unknown
COG003848	VtoE	1460289	Chrysochromulina tobinii	Weakly supported	Weakly supported	origin = virus, long branching recipient	1.76788	88.4	root	L-FUCOSYLTRANSFERASE	0.5	2	Expressed protein	0.655172	29	52	Peroxisome
COG004067	VtoE	1460289	Chrysochromulina tobinii	Weakly supported	Weakly supported	origin = virus, long branching donor	1.38704	97.1	root	No annotation	0	0	no annotation	0	0	45	Unknown
COG001220	VtoE	7718	Ciona	2732007	Nucleocytoviricota	origin = eukaryotic	0.342176	92.4	84.7	UDP-GALACTOPYRANOSE MUTASE	1	119	UDP-galactopyranose mutase	0.799257	269	270	Cytoplasm
COG000095	VtoE	309737	Cladosiphon okamuranus	39420	Feldmannia species virus	origin = unkn	0.585074	90.5	100	DNA POLYMERASE CATALYTIC SUBUNIT	1	1438	DNA polymerase family B	0.952317	1489	1582	Cytoplasm
COG002027	VtoE	309737	Cladosiphon okamuranus	39420	Feldmannia species virus	origin = unkn	0.443779	99.8	100	ATP BINDING PROTEIN-RELATED	0.9565	23	D5 N terminal like	1	153	163	Unknown
COG005620	VtoE	309737	Cladosiphon okamuranus	181085	Phaeovirus	origin = virus, cousin unclear	0.779543	95.6	root	No annotation	0	0	no annotation	0	0	18	Unknown
COG004688	VtoE	309737	Cladosiphon okamuranus	231992	Feldmannia irregularis virus a	origin = virus	0.118162	94.6	95	No annotation	0	0	no annotation	0	0	31	Unknown
COG008712	VtoE	309737	Cladosiphon okamuranus	231992	Feldmannia irregularis virus a	origin = unkn	0.275005	82.9	100	No annotation	0	0	no annotation	0	0	6	Nucleus
COG001454	VtoE	186625	Clupeocephala	2017756	Alphairidovirinae	origin = eukaryotic	0.123781	92.4	91.9	NAD DEPENDENT EPIMERASE/DEHYDRATASE	0.9954	217	steroid biosynthetic process	0.597345	226	226	Endoplasmic_reticulum
COG000961	VtoE	574566	Coccomyxa subellipsoidea C-169	880159	Bathycoccus sp. RCC1105 virus BpV1	origin = eukaryotic	0.710884	98.4	95.7	UNNAMED PRODUCT	0.944	125	FG-GAP repeat	0.657492	327	337	Extracellular
COG003572	VtoE	574566	Coccomyxa subellipsoidea C-169	2023203	Pithoviridae	origin = prokaryotic	2.27946	85.1	90.3	FIP1-LIKE 1 PROTEIN	1	1	belongs to the thioredoxin family	0.360656	61	63	Endoplasmic_reticulum
COG000380	VtoE	574566	Coccomyxa subellipsoidea C-169	2732007	Nucleocytoviricota	origin = virus	1.55365	85.8	84.8	No annotation	0	0	Predicted membrane protein (DUF2177)	0.735537	242	649	Endoplasmic_reticulum
COG001308	VtoE	574566	Coccomyxa subellipsoidea C-169	2732007	Nucleocytoviricota	origin = unkn	0.543021	94.9	100	BETA-1,4-MANNOSYL-GLYCOPROTEIN BETA-1,4-N-ACETYLGLUCOSAMINYL-TRANSFERASE	1	147	Glycosyltransferase family 17	0.814655	232	252	Unknown
COG003578	VtoE	574566	Coccomyxa subellipsoidea C-169	Weakly supported	Weakly supported	origin = virus, sister unclear	1.29032	93.5	91.5	UNCHARACTERIZED	1	1	no annotation	0	0	63	Cytoplasm
COG000509	VtoE	29159	Crassostrea gigas	10239	Viruses	origin = virus	1.11472	root	root	No annotation	0	0	ATPase activity, uncoupled	1	538	546	Nucleus
COG007816	VtoE	29159	Crassostrea gigas	Weakly supported	Weakly supported	origin = virus, sister unclear	1.44938	87.5	root	ANKYRIN REPEAT-CONTAINING PROTEIN DDB_G0279043	0.2857	7	ankyrin repeat and death	0.333333	6	7	Cytoplasm
COG000108	VtoE	1884633	Cryptococcaceae	549779	Mimiviridae	origin = eukaryotic, cousin unclear	1.29737	94.1	98.1	DNA POLYMERASE TYPE-X FAMILY MEMBER	0.7341	1245	DNA ligase (NAD+) activity	0.532909	1413	1460	Mitochondrion
COG000137	VtoE	3027	Cryptophyceae	10239	Viruses	origin = unkn	0.605901	86.9	100	REPLICATION FACTOR C / DNA POLYMERASE III GAMMA-TAU SUBUNIT	0.9991	1056	Part of the RFC clamp loader complex which loads the PCNA sliding clamp onto DNA	0.14134	1224	1230	Mitochondrion
COG000802	VtoE	3027	Cryptophyceae	Weakly supported	Weakly supported	origin = eukaryotic, long branching donor	0.763795	86	89.7	N-MYRISTOYL TRANSFERASE	0.9974	381	Adds a myristoyl group to the N-terminal glycine residue of certain cellular proteins	0.794271	384	387	Mitochondrion
COG000957	VtoE	5806	Cryptosporidium	2732007	Nucleocytoviricota	origin = eukaryotic	0.819601	86.7	80.4	DOMAIN OOKINETE PROTEIN, PUTATIVE-RELATED	0.9968	314	Protein kinase	0.533333	15	338	Cytoplasm
COG000269	VtoE	441375	Cryptosporidium muris RN66	455363	unclassified Phycodnaviridae	origin = eukaryotic, cousin unclear	0.650594	95.6	80.6	ACYL-COA-BINDING PROTEIN, ACBP	0.9137	556	Acyl CoA binding protein	0.386308	818	832	Cytoplasm
COG000262	VtoE	441375	Cryptosporidium muris RN66	Weakly supported	Weakly supported	origin = virus, long branching donor	0.860722	83.1	98.9	UNCHARACTERIZED	0.9985	663	FtsJ-like methyltransferase	0.654919	681	856	Nucleus
COG000889	VtoE	280699	Cyanidioschyzon merolae strain 10D	2732007	Nucleocytoviricota	origin = virus	1.15081	82.2	88.6	DUF814-RELATED	1	56	Domain of unknown function (DUF814)	0.296296	135	359	Mitochondrion
COG001746	VtoE	280699	Cyanidioschyzon merolae strain 10D	Weakly supported	Weakly supported	origin = eukaryotic, long branching donor	1.32303	87.9	88.5	DIPHOSPHOINOSITOL POLYPHOSPHATE PHOSPHOHYDROLASE	0.9835	182	Nudix hydrolase	0.38172	186	188	Nucleus
COG000179	VtoE	36022	Cyberlindnera fabianii	Weakly supported	Weakly supported	origin = virus, long branching recipient	2.35525	82.6	95.2	5'->3' EXORIBONUCLEASE	1	1016	XRN 5'-3' exonuclease N-terminus	0.779195	1019	1056	Unknown
COG005407	VtoE	7955	Danio rerio	2116490	Guangdong red-banded snake chuvirus-like virus	origin = virus	1.05203	82.3	98.8	No annotation	0	0	no annotation	0	0	20	Cytoplasm
COG000402	VtoE	6669	Daphnia pulex	2732007	Nucleocytoviricota	origin = virus	1.58042	95.6	85.2	RBR FAMILY RING FINGER AND IBR DOMAIN-CONTAINING	0.984	250	N-methyltransferase activity	0.799636	549	629	Mitochondrion
COG000055	VtoE	6669	Daphnia pulex	Weakly supported	Weakly supported	origin = eukaryotic, long branching recipient	3.09027	93.7	99.2	DNA TOPOISOMERASE/GYRASE	0.9857	2162	Control of topological states of DNA by transient breakage and subsequent rejoining of DNA strands	0.471552	2197	2268	Unknown
COG001909	VtoE	33083	Dictyostelia	10239	Viruses	origin = virus, cousin unclear	0.100844	92.8	85.4	DNA-(APURINIC OR APYRIMIDINIC SITE) LYASE	1	1	no annotation	0	0	174	Nucleus
COG000770	VtoE	33083	Dictyostelia	181083	Chlorovirus	origin = eukaryotic, cousin unclear	0.723265	93	95	GLCNAC TRANSFERASE-RELATED	1	318	Glycosyltransferase (GlcNAc)	0.845758	389	396	Nucleus
COG000516	VtoE	5786	Dictyostelium purpureum	549779	Mimiviridae	origin = eukaryotic	0.501913	90.9	85.9	CYTOSINE DEAMINASE FAMILY MEMBER	0.8077	52	Domain of unknown function (DUF1768)	0.526316	532	539	Cytoplasm
COG004760	VtoE	5786	Dictyostelium purpureum	2732007	Nucleocytoviricota	origin = eukaryotic	0.859728	91.2	94.8	HOMOCYSTEINE/CYSTEINE SYNTHASE	0.85	20	cystathionine gamma-synthase activity	0.695652	23	29	Extracellular
COG004065	VtoE	5786	Dictyostelium purpureum	2732523	Megaviricetes	origin = virus	0.771965	93.3	80.7	No annotation	0	0	OTU-like cysteine protease family protein	1	1	45	Mitochondrion
COG007436	VtoE	5786	Dictyostelium purpureum	2732523	Megaviricetes	origin = virus	1.51544	83.3	90.9	PTHR46563:SF2	0.3333	3	ubiquitin-protein transferase activity	1	1	8	Cytoplasm
COG000005	VtoE	5786	Dictyostelium purpureum	Weakly supported	Weakly supported	origin = eukaryotic, long branching recipient	1.75445	84.6	88.5	DRAB5-RELATED	0.2327	10584	Rab subfamily of small GTPases	0.149102	10798	10903	Unknown
COG000005	VtoE	5786	Dictyostelium purpureum	Weakly supported	Weakly supported	origin = eukaryotic, long branching donor	0.992926	81.4	81.1	DRAB5-RELATED	0.2327	10584	Rab subfamily of small GTPases	0.149102	10798	10903	Unknown
COG000516	VtoE	5786	Dictyostelium purpureum	Weakly supported	Weakly supported	origin = eukaryotic, long branching recipient	4.39291	82.9	89.4	CYTOSINE DEAMINASE FAMILY MEMBER	0.8077	52	Domain of unknown function (DUF1768)	0.526316	532	539	Mitochondrion
COG000027	VtoE	6179	Digenea	455363	unclassified Phycodnaviridae	origin = eukaryotic	0.402997	81.9	81.1	SERINE/THREONINE PROTEIN PHOSPHATASE	0.3526	3307	Serine threonine-protein phosphatase	0.232781	3441	3460	Plastid
COG001208	VtoE	2864	Dinophyceae	10239	Viruses	origin = unkn, cousin unclear	0.648571	86.5	95.5	STRUCTURE-SPECIFIC ENDONUCLEASE SUBUNIT SLX1	1	252	Catalytic subunit of the slx1-slx4 structure-specific endonuclease that resolves DNA secondary structures generated during DNA repair and recombination	0.313901	223	272	Nucleus
COG000404	VtoE	2864	Dinophyceae	10501	Phycodnaviridae	origin = virus	1.11439	84.1	83	L-FUCOSYLTRANSFERASE	0.625	8	Glycosyltransferase family 25 (LPS biosynthesis protein)	0.850168	594	627	Extracellular
COG000113	VtoE	2864	Dinophyceae	455363	unclassified Phycodnaviridae	origin = eukaryotic	0.518597	87.4	92.3	UBIQUITIN	0.9609	1279	ubiquitin	0.414104	1333	1402	Cytoplasm
COG002534	VtoE	2864	Dinophyceae	455363	unclassified Phycodnaviridae	origin = virus	0.286843	90.9	90.7	BETA1,3-GALACTOSYLTRANSFERASE	0.5	2	Glycosyl transferase, family 2	0.84	25	131	Cytoplasm
COG000196	VtoE	2864	Dinophyceae	549779	Mimiviridae	origin = virus	0.793213	91.5	86.1	ATP DEPENDENT LON PROTEASE FAMILY MEMBER	0.9572	957	ATP-dependent peptidase activity	0.77732	970	1008	Cytoplasm
COG001265	VtoE	2864	Dinophyceae	2559587	Riboviria	origin = virus	0.857861	94.8	85.9	No annotation	0	0	structural molecule activity	0.846535	202	260	Unknown
COG000360	VtoE	2864	Dinophyceae	2732007	Nucleocytoviricota	origin = eukaryotic	0.35525	82.6	86.9	(E3-INDEPENDENT) E2 UBIQUITIN-CONJUGATING ENZYME	0.9877	653	protein modification by small protein conjugation	0.727549	657	675	Nucleus
COG000401	VtoE	2864	Dinophyceae	2732007	Nucleocytoviricota	origin = eukaryotic, cousin unclear	0.761853	99.4	97.6	BETA-1,4-GALACTOSYLTRANSFERASE	0.9967	610	N-terminal region of glycosyl transferase group 7	0.248387	620	630	Plastid
COG003059	VtoE	2864	Dinophyceae	2732007	Nucleocytoviricota	origin = prokaryotic	1.01271	89.9	88.3	MANNOSYL PHOSPHORYLINOSITOL CERAMIDE SYNTHASE	0.5	2	methyltransferase	0.554217	83	89	Cytoplasm
COG003312	VtoE	2864	Dinophyceae	2732007	Nucleocytoviricota	origin = unkn	1.07211	91	80.1	ALPHA- 1,3 -FUCOSYLTRANSFERASE	0.7778	9	Glycosyltransferase family 10 (fucosyltransferase) C-term	0.818182	11	75	Cytoplasm
COG004273	VtoE	2864	Dinophyceae	2732007	Nucleocytoviricota	origin = virus	0.609495	root	root	INOSITOL PHOSPHOCERAMIDE MANNOSYLTRANSFERASE 1	0.3333	3	Capsular polysaccharide synthesis protein	0.631579	19	40	Cytoplasm
COG005783	VtoE	2864	Dinophyceae	2732007	Nucleocytoviricota	origin = unkn	0.923519	86.6	91.1	CALCIUM-INDEPENDENT PHOSPHOLIPASE A2 IPLA2 -RELATED	1	8	triglyceride catabolic process	0.5	8	16	Cytoplasm
COG000348	VtoE	2864	Dinophyceae	2732523	Megaviricetes	origin = virus, cousin unclear	0.606825	96.7	83.6	ALR/ERV	1	410	Erv1 / Alr family	0.908273	556	689	Extracellular
COG000019	VtoE	2864	Dinophyceae	Weakly supported	Weakly supported	origin = eukaryotic, long branching recipient	0.804542	84.4	96.3	HEAT SHOCK PROTEIN 70KDA	0.8288	3895	Belongs to the heat shock protein 70 family	0.27064	4530	4585	Extracellular
COG000383	VtoE	7227	Drosophila melanogaster	10239	Viruses	origin = eukaryotic, cousin unclear	0.968084	91.1	87.8	SKP1	0.9934	608	Belongs to the SKP1 family	0.558917	628	644	Cytoplasm
COG000433	VtoE	7227	Drosophila melanogaster	10239	Viruses	origin = unkn, cousin unclear	0.474381	99.6	84.6	INHIBITOR OF APOPTOSIS	0.9693	587	Inhibitor of Apoptosis domain	0.256711	596	604	Nucleus
COG002980	VtoE	7227	Drosophila melanogaster	558016	Alphabaculovirus	origin = virus	1.54818	89.5	93.6	FIBROBLAST GROWTH FACTOR	1	64	Fibroblast growth factor	0.978495	93	95	Unknown
COG002670	VtoE	7227	Drosophila melanogaster	Weakly supported	Weakly supported	origin = virus, long branching recipient	1.6604	80.9	85.1	NF-KAPPA-B INHIBITOR ALPHA	0.9759	83	response to abiotic stimulus	0.775862	116	118	Cytoplasm
COG000185	VtoE	27848	Echinostoma caproni	12429	unclassified viruses	origin = eukaryotic	1.15438	96.1	81.4	PROTEIN DISULFIDE ISOMERASE	0.7652	1005	Thioredoxin-like domain	0.160118	1018	1036	Unknown
COG000009	VtoE	27848	Echinostoma caproni	Weakly supported	Weakly supported	origin = unkn, long branching recipient	1.06726	98.5	89.5	CELL DIVISION PROTEIN KINASE	0.4861	7181	Belongs to the protein kinase superfamily	0.127773	7302	7369	Unknown
COG000054	VtoE	27848	Echinostoma caproni	Weakly supported	Weakly supported	origin = eukaryotic, long branching recipient	3.52047	97.2	90.2	RECEPTOR-TYPE TYROSINE-PROTEIN PHOSPHATASE	0.7706	2210	protein tyrosine phosphatase activity	0.419454	2272	2296	Cell_membrane
COG000249	VtoE	27848	Echinostoma caproni	Weakly supported	Weakly supported	origin = eukaryotic, long branching recipient	2.06369	93.2	91.7	PROTEASE FAMILY S9A OLIGOPEPTIDASE	0.6147	558	Prolyl oligopeptidase, N-terminal beta-propeller domain	0.272311	874	881	Unknown
COG000031	VtoE	2877	Ectocarpales	181085	Phaeovirus	origin = virus	0.0583005	93.5	99.5	REGULATOR OF CHROMOSOME CONDENSATION	0.5	4	Large eukaryotic DNA virus major capsid protein	0.999061	3194	3272	Cytoplasm
COG000040	VtoE	2877	Ectocarpales	654926	Ectocarpus siliculosus virus 1 (isolate Kaikoura)	origin = unkn	0.386038	98.9	100	TWO-COMPONENT HISTIDINE KINASE	0.4898	1374	PhoQ Sensor	0.307939	2809	2838	Endoplasmic_reticulum
COG003246	VtoE	2877	Ectocarpales	1586712	Yellowstone lake mimivirus	origin = prokaryotic, cousin unclear	0.181178	99.6	98.5	CELLULOSE SYNTHASE CATALYTIC SUBUNIT A [UDP-FORMING]	1	52	Belongs to the glycosyl hydrolase 12 (cellulase H) family	0.544304	79	79	Cell_membrane
COG004688	VtoE	2880	Ectocarpus siliculosus	39420	Feldmannia species virus	origin = virus, cousin unclear	0.462792	84	92	No annotation	0	0	no annotation	0	0	31	Unknown
COG004296	VtoE	2880	Ectocarpus siliculosus	181085	Phaeovirus	origin = virus	0.201816	99.8	root	UBIQUITIN CARBOXYL-TERMINAL HYDROLASE	1	1	serine threonine protein kinase	1	1	39	Mitochondrion
COG000040	VtoE	2880	Ectocarpus siliculosus	231992	Feldmannia irregularis virus a	origin = eukaryotic	0.3323	88.5	99.9	TWO-COMPONENT HISTIDINE KINASE	0.4898	1374	PhoQ Sensor	0.307939	2809	2838	Cytoplasm
COG004688	VtoE	2880	Ectocarpus siliculosus	231992	Feldmannia irregularis virus a	origin = virus, cousin unclear	0.538081	98.8	87.8	No annotation	0	0	no annotation	0	0	31	Cytoplasm
COG000001	VtoE	2880	Ectocarpus siliculosus	654926	Ectocarpus siliculosus virus 1 (isolate Kaikoura)	origin = eukaryotic	0.0563331	99.9	99.9	SERINE/THREONINE-PROTEIN KINASE	0.2995	16718	protein serine/threonine kinase activity	0.191391	17075	17289	Unknown
COG000021	VtoE	2880	Ectocarpus siliculosus	654926	Ectocarpus siliculosus virus 1 (isolate Kaikoura)	origin = eukaryotic	0.0520068	100	97.7	CYSTEINE PROTEASE FAMILY C1-RELATED	0.9951	3849	Belongs to the peptidase C1 family	0.410457	4093	4142	Unknown
COG000068	VtoE	2880	Ectocarpus siliculosus	654926	Ectocarpus siliculosus virus 1 (isolate Kaikoura)	origin = eukaryotic	0.0167861	100	98.7	RIBONUCLEOSIDE-DIPHOSPHATE REDUCTASE SMALL CHAIN	0.9972	1762	Ribonucleotide reductase, small chain	0.392931	1924	1961	Cytoplasm
COG000094	VtoE	2880	Ectocarpus siliculosus	654926	Ectocarpus siliculosus virus 1 (isolate Kaikoura)	origin = prokaryotic	0.0823998	100	87.4	RAD25/XP-B DNA REPAIR HELICASE	0.9837	1167	N-methyltransferase activity	0.794233	1526	1582	Cytoplasm
COG000101	VtoE	2880	Ectocarpus siliculosus	654926	Ectocarpus siliculosus virus 1 (isolate Kaikoura)	origin = virus	0.0295794	100	100	PHOSPHORYN, PUTATIVE-RELATED-RELATED	1	1	adenyl ribonucleotide binding	0.989933	1490	1535	Cytoplasm
COG000332	VtoE	2880	Ectocarpus siliculosus	654926	Ectocarpus siliculosus virus 1 (isolate Kaikoura)	origin = virus	2.6393e-06	89.9	98.2	No annotation	0	0	no annotation	0	0	716	Cytoplasm
COG000348	VtoE	2880	Ectocarpus siliculosus	654926	Ectocarpus siliculosus virus 1 (isolate Kaikoura)	origin = virus	0.0218075	100	97.3	ALR/ERV	1	410	Erv1 / Alr family	0.908273	556	689	Unknown
COG000358	VtoE	2880	Ectocarpus siliculosus	654926	Ectocarpus siliculosus virus 1 (isolate Kaikoura)	origin = unkn	0.0273262	100	91.4	DNA POLYMERASE III SUBUNIT EPSILON	0.9941	170	Exonuclease	0.488525	610	678	Unknown
COG000379	VtoE	2880	Ectocarpus siliculosus	654926	Ectocarpus siliculosus virus 1 (isolate Kaikoura)	origin = prokaryotic	0.130862	99.9	99.6	EBNA2 BINDING PROTEIN P100	1	233	Staphylococcal nuclease homologue	0.806641	512	650	Unknown
COG001017	VtoE	2880	Ectocarpus siliculosus	654926	Ectocarpus siliculosus virus 1 (isolate Kaikoura)	origin = eukaryotic	2.3444e-06	95.8	95	OLIGORIBONUCLEASE, MITOCHONDRIAL	0.994	167	3'-to-5' exoribonuclease specific for small oligoribonucleotides	0.49359	312	321	Unknown
COG001610	VtoE	2880	Ectocarpus siliculosus	654926	Ectocarpus siliculosus virus 1 (isolate Kaikoura)	origin = eukaryotic	0.0816582	100	84	TWO-COMPONENT HISTIDINE PROTEIN KINASE	0.4444	27	Phytochrome region	0.254902	204	204	Cytoplasm
COG001857	VtoE	2880	Ectocarpus siliculosus	654926	Ectocarpus siliculosus virus 1 (isolate Kaikoura)	origin = virus	0.6703	99.8	90.8	DNA-BINDING PROTEIN-RELATED-RELATED	1	21	DNA binding	0.610687	131	178	Cytoplasm
COG004688	VtoE	2880	Ectocarpus siliculosus	654926	Ectocarpus siliculosus virus 1 (isolate Kaikoura)	origin = virus	0.062898	100	96.5	No annotation	0	0	no annotation	0	0	31	Unknown
COG004759	VtoE	2880	Ectocarpus siliculosus	654926	Ectocarpus siliculosus virus 1 (isolate Kaikoura)	origin = virus	2.3387e-06	100	84.6	No annotation	0	0	no annotation	0	0	29	Unknown
COG005469	VtoE	2880	Ectocarpus siliculosus	654926	Ectocarpus siliculosus virus 1 (isolate Kaikoura)	origin = unkn	0.0330266	99.6	99.4	No annotation	0	0	SET (Su(var)3-9, Enhancer-of-zeste, Trithorax) domain	1	12	19	Nucleus
COG007053	VtoE	2880	Ectocarpus siliculosus	654926	Ectocarpus siliculosus virus 1 (isolate Kaikoura)	origin = eukaryotic	0.119123	99.7	94.7	No annotation	0	0	no annotation	0	0	10	Unknown
COG008688	VtoE	2880	Ectocarpus siliculosus	654926	Ectocarpus siliculosus virus 1 (isolate Kaikoura)	origin = eukaryotic	0.0712246	100	root	No annotation	0	0	no annotation	0	0	6	Cytoplasm
COG008711	VtoE	2880	Ectocarpus siliculosus	654926	Ectocarpus siliculosus virus 1 (isolate Kaikoura)	origin = eukaryotic	0.010814	99.8	root	No annotation	0	0	no annotation	0	0	6	Nucleus
COG008712	VtoE	2880	Ectocarpus siliculosus	654926	Ectocarpus siliculosus virus 1 (isolate Kaikoura)	origin = virus	0.0451855	100	root	No annotation	0	0	no annotation	0	0	6	Mitochondrion
COG009375	VtoE	2880	Ectocarpus siliculosus	654926	Ectocarpus siliculosus virus 1 (isolate Kaikoura)	origin = unkn	0.0820063	99.9	86	No annotation	0	0	no annotation	0	0	5	Nucleus
COG003025	VtoE	2880	Ectocarpus siliculosus	2732007	Nucleocytoviricota	origin = eukaryotic	0.740262	100	92.7	SYNTHASE CPS1, PUTATIVE (AFU_ORTHOLOGUE AFUA_7G02500)-RELATED	0.9	20	PFAM Glycosyl transferase family 2	0.277778	90	91	Endoplasmic_reticulum
COG000149	VtoE	2880	Ectocarpus siliculosus	Weakly supported	Weakly supported	origin = virus, sister unclear	0.0560581	97.3	99.9	EXONUCLEASE, PHAGE-TYPE/RECB, C-TERMINAL DOMAIN-CONTAINING PROTEIN	1	970	induction by virus of catabolism of host mRNA	0.993601	1094	1147	Unknown
COG000199	VtoE	2880	Ectocarpus siliculosus	Weakly supported	Weakly supported	origin = virus, sister unclear	0.137849	100	93.9	DNA-DIRECTED RNA POLYMERASE I SUBUNIT 2	0.3333	3	HNH endonuclease	0.732632	950	1001	Unknown
COG002455	VtoE	2880	Ectocarpus siliculosus	Weakly supported	Weakly supported	origin = eukaryotic, long branching recipient	5.87222	100	100	DEAD/H RNA HELICASE, PUTATIVE-RELATED	0.9444	126	helicase activity	0.674419	129	138	Nucleus
COG000853	VtoE	3193	Embryophyta	10239	Viruses	origin = eukaryotic	0.482124	99.2	root	STRUCTURE-SPECIFIC ENDONUCLEASE SUBUNIT SLX1	1	354	Structure-specific endonuclease subunit	0.60452	354	368	Mitochondrion
COG000195	VtoE	3193	Embryophyta	549779	Mimiviridae	origin = unkn	1.01121	80.2	89.5	URACIL-DNA GLYCOSYLASE	0.9941	847	Excises uracil residues from the DNA which can arise as a result of misincorporation of dUMP residues by DNA polymerase or due to deamination of cytosine	0.505976	1004	1012	Extracellular
COG000094	VtoE	2903	Emiliania huxleyi	10239	Viruses	origin = prokaryotic	0.451653	96.5	84.5	RAD25/XP-B DNA REPAIR HELICASE	0.9837	1167	N-methyltransferase activity	0.794233	1526	1582	Nucleus
COG001085	VtoE	2903	Emiliania huxleyi	10239	Viruses	origin = eukaryotic	1.25256	82.3	89.7	No annotation	0	0	cephalosporin hydroxylase	0.764706	289	299	Unknown
COG000560	VtoE	2903	Emiliania huxleyi	10501	Phycodnaviridae	origin = eukaryotic	0.621053	88.8	95.3	PHOSPHATE TRANSPORTER	1	345	Sodium-phosphate symporter which plays a fundamental housekeeping role in phosphate transport	0.376754	499	507	Cell_membrane
COG005890	VtoE	2903	Emiliania huxleyi	10501	Phycodnaviridae	origin = virus	1.99109	87	root	No annotation	0	0	no annotation	0	0	15	Mitochondrion
COG001538	VtoE	2903	Emiliania huxleyi	455363	unclassified Phycodnaviridae	origin = virus, cousin unclear	0.892673	87.8	89.7	EXPRESSED PROTEIN	0.9592	98	Protein of unknown function (DUF3431)	0.87766	188	213	Cell_membrane
COG007402	VtoE	2903	Emiliania huxleyi	455363	unclassified Phycodnaviridae	origin = virus	0.219697	98.7	root	ESTERASE OVCA2	0.8571	7	polyketide biosynthetic process	0.875	8	8	Cell_membrane
COG007067	VtoE	2903	Emiliania huxleyi	754068	Emiliania huxleyi virus PS401	origin = virus	0.528226	99.5	root	No annotation	0	0	no annotation	0	0	10	Unknown
COG001129	VtoE	2903	Emiliania huxleyi	1881285	Vibrio phage 2.275.O._10N.286.54.E11	origin = unkn	1.21418	82.6	83.7	No annotation	0	0	von Willebrand factor (vWF) type A domain	0.568182	264	290	Extracellular
COG000759	VtoE	2903	Emiliania huxleyi	1977640	Klosneuvirus KNV1	origin = prokaryotic	0.92022	92.1	99.7	SLR1610 PROTEIN	0.92	75	Putative zinc binding domain	0.387909	397	398	Mitochondrion
COG001930	VtoE	2903	Emiliania huxleyi	2732007	Nucleocytoviricota	origin = eukaryotic	1.83983	89.1	99.4	MANNOSYL PHOSPHORYLINOSITOL CERAMIDE SYNTHASE	0.9091	11	Capsular polysaccharide synthesis protein	0.816568	169	172	Unknown
COG002915	VtoE	2903	Emiliania huxleyi	2732007	Nucleocytoviricota	origin = virus	0.801223	91.6	94	F-BOX/TPR REPEAT PROTEIN POF3	1	85	U-box domain	0.5	8	99	Extracellular
COG002979	VtoE	2903	Emiliania huxleyi	2732007	Nucleocytoviricota	origin = virus	2.25281	88.4	97	No annotation	0	0	function	1	10	95	Plastid
COG003902	VtoE	2903	Emiliania huxleyi	2732007	Nucleocytoviricota	origin = virus	1.80524	100	root	MANNOSYL PHOSPHORYLINOSITOL CERAMIDE SYNTHASE	0.7949	39	Glycosyltransferase sugar-binding region containing DXD motif	0.731707	41	50	Mitochondrion
COG004137	VtoE	2903	Emiliania huxleyi	2732007	Nucleocytoviricota	origin = virus	1.90944	96.8	94.6	ALPHA-1,6-MANNOSYLTRANSFERASE MNN11-RELATED	0.9583	24	galactosyl transferase GMA12/MNN10 family	0.4	10	43	Unknown
COG004887	VtoE	2903	Emiliania huxleyi	2732007	Nucleocytoviricota	origin = virus	2.2075	94.8	92.6	GLYCOSYLTRANSFERASE 25 FAMILY MEMBER	1	6	glycoprotein 6-alpha-L-fucosyltransferase activity	0.416667	12	27	Mitochondrion
COG005030	VtoE	2903	Emiliania huxleyi	2732007	Nucleocytoviricota	origin = virus	0.795651	root	root	No annotation	0	0	Tetratricopeptide repeat	1	1	25	Cytoplasm
COG005576	VtoE	2903	Emiliania huxleyi	2732007	Nucleocytoviricota	origin = virus, cousin unclear	1.03908	99.8	root	No annotation	0	0	no annotation	0	0	18	Unknown
COG003419	VtoE	2903	Emiliania huxleyi	2732523	Megaviricetes	origin = virus	1.59973	97.6	root	MANNOSYL PHOSPHORYLINOSITOL CERAMIDE SYNTHASE	0.9844	64	Glycosyltransferase sugar-binding region containing DXD motif	0.446154	65	69	Unknown
COG000950	VtoE	2903	Emiliania huxleyi	2732555	Pimascovirales	origin = unkn	0.89297	81	91.2	SLR1628 PROTEIN	1	68	Uncharacterized protein conserved in bacteria (DUF2237)	0.517647	340	341	Unknown
COG000230	VtoE	2903	Emiliania huxleyi	Weakly supported	Weakly supported	origin = prokaryotic, long branching recipient	1.53683	86.5	93.8	PROTEIN PHOH	1	762	PhoH-like protein	0.450873	916	923	Mitochondrion
COG000916	VtoE	2903	Emiliania huxleyi	Weakly supported	Weakly supported	origin = eukaryotic, long branching recipient	1.98514	83.6	86.4	ASPARTATE BETA-HYDROXYLASE DOMAIN-CONTAINING PROTEIN 2	0.9756	82	Aspartyl/Asparaginyl beta-hydroxylase	0.357349	347	350	Unknown
COG001308	VtoE	2903	Emiliania huxleyi	Weakly supported	Weakly supported	origin = eukaryotic, long branching donor	1.85866	95.3	82.4	BETA-1,4-MANNOSYL-GLYCOPROTEIN BETA-1,4-N-ACETYLGLUCOSAMINYL-TRANSFERASE	1	147	Glycosyltransferase family 17	0.814655	232	252	Unknown
COG001445	VtoE	2903	Emiliania huxleyi	Weakly supported	Weakly supported	origin = eukaryotic, long branching recipient	0.805304	97.3	83.9	PHOSPHO-2-DEHYDRO-3-DEOXYHEPTONATE ALDOLASE	0.9737	76	Belongs to the KdsA family	0.340708	226	227	Mitochondrion
COG002708	VtoE	2903	Emiliania huxleyi	Weakly supported	Weakly supported	origin = virus, long branching recipient	1.23238	83.9	89.9	ZINC FINGER PROTEIN ZIC AND GLI	1	1	no annotation	0	0	114	Peroxisome
COG003329	VtoE	2903	Emiliania huxleyi	Weakly supported	Weakly supported	origin = virus, sister unclear	1.1933	97.5	root	PROCOLLAGEN-LYSINE,2-OXOGLUTARATE 5-DIOXYGENASE/GLYCOSYLTRANSFERASE 25 FAMILY MEMBER	0.9737	38	procollagen-lysine 5-dioxygenase activity	0.5	50	74	Unknown
COG004417	VtoE	2903	Emiliania huxleyi	Weakly supported	Weakly supported	origin = virus, long branching recipient	1.531	root	root	DNA PRIMASE	1	1	CHC2 zinc finger	0.945946	37	37	Mitochondrion
COG005151	VtoE	2903	Emiliania huxleyi	Weakly supported	Weakly supported	origin = virus, sister unclear	1.73206	95.7	root	No annotation	0	0	Glycosyl transferases group 1	0.8	5	23	Unknown
COG005486	VtoE	2903	Emiliania huxleyi	Weakly supported	Weakly supported	origin = virus, long branching recipient	6.36617	98.8	root	No annotation	0	0	Glycosyltransferase family 92	0.625	8	19	Unknown
COG000657	VtoE	284813	Encephalitozoon cuniculi GB-M1	549779	Mimiviridae	origin = eukaryotic	1.06983	93	96.7	LEUCYL-TRNA SYNTHETASE	1	293	Belongs to the class-I aminoacyl-tRNA synthetase family	0.708241	449	451	Cytoplasm
COG000030	VtoE	284813	Encephalitozoon cuniculi GB-M1	1977639	Klosneuvirus	origin = eukaryotic	0.516262	87.5	90.2	UBIQUITIN-CONJUGATING ENZYME E2	0.9944	3206	protein modification by small protein conjugation	0.406107	3275	3304	Nucleus
COG000245	VtoE	284813	Encephalitozoon cuniculi GB-M1	2732523	Megaviricetes	origin = eukaryotic	0.86538	96.3	94.5	METHIONYL-TRNA SYNTHETASE	0.5899	456	Is required not only for elongation of protein synthesis but also for the initiation of all mRNA translation through initiator tRNA(fMet) aminoacylation	0.461712	888	889	Unknown
COG000907	VtoE	284813	Encephalitozoon cuniculi GB-M1	2732523	Megaviricetes	origin = eukaryotic, cousin unclear	0.72376	87.6	90	DNA-DIRECTED RNA POLYMERASES I, II, AND III SUBUNIT RPABC5 FAMILY MEMBER	1	233	DNA-dependent RNA polymerase catalyzes the transcription of DNA into RNA using the four ribonucleoside triphosphates as substrates	0.337209	344	354	Mitochondrion
COG000005	VtoE	284813	Encephalitozoon cuniculi GB-M1	Weakly supported	Weakly supported	origin = prokaryotic, long branching donor	1.18896	90.9	89.4	DRAB5-RELATED	0.2327	10584	Rab subfamily of small GTPases	0.149102	10798	10903	Cytoplasm
COG000162	VtoE	284813	Encephalitozoon cuniculi GB-M1	Weakly supported	Weakly supported	origin = eukaryotic, long branching recipient	1.69695	87.3	94.3	UBIQUITIN CARBOXYL-TERMINAL HYDROLASE	1	1081	Belongs to the peptidase C19 family	0.372835	1097	1116	Nucleus
COG000239	VtoE	284813	Encephalitozoon cuniculi GB-M1	Weakly supported	Weakly supported	origin = unkn, long branching donor	0.241706	86.6	82.9	DNA-DIRECTED RNA POLYMERASE SUBUNIT K	0.9051	411	RNA polymerase Rpb6	0.524297	782	905	Cytoplasm
COG000383	VtoE	284813	Encephalitozoon cuniculi GB-M1	Weakly supported	Weakly supported	origin = eukaryotic, long branching recipient	1.54942	91.1	87.8	SKP1	0.9934	608	Belongs to the SKP1 family	0.558917	628	644	Cytoplasm
COG000792	VtoE	284813	Encephalitozoon cuniculi GB-M1	Weakly supported	Weakly supported	origin = eukaryotic, long branching recipient	1.6483	93.4	99.5	3-HYDROXY-3-METHYLGLUTARYL-COENZYME A REDUCTASE	0.9957	230	Belongs to the HMG-CoA reductase family	0.387597	387	389	Peroxisome
COG000926	VtoE	284813	Encephalitozoon cuniculi GB-M1	Weakly supported	Weakly supported	origin = eukaryotic, long branching recipient	2.21023	94.9	85.1	CHROMOSOME TRANSMISSION FIDELITY FACTOR 18	1	314	Replication factor RFC1 C terminal domain	0.227405	343	346	Unknown
COG000110	VtoE	5758	Entamoeba	10239	Viruses	origin = unkn, cousin unclear	0.217854	80.5	87.3	DEOXYURIDINE 5'-TRIPHOSPHATE NUCLEOTIDOHYDROLASE	1	940	dUTPase	0.432432	1406	1412	Cytoplasm
COG000203	VtoE	5758	Entamoeba	10239	Viruses	origin = unkn, cousin unclear	1.11342	86.1	82.5	MICROTUBULE-ASSOCIATED PROTEINS 1A/1B LIGHT CHAIN 3-RELATED	0.999	954	Belongs to the ATG8 family	0.387565	965	987	Cytoplasm
COG000488	VtoE	5758	Entamoeba	549779	Mimiviridae	origin = eukaryotic	0.60044	90.9	90.8	EUKARYOTIC TRANSLATION INITIATION FACTOR	1	273	translation initiation factor activity	0.919643	560	562	Nucleus
COG000005	VtoE	5758	Entamoeba	2732555	Pimascovirales	origin = eukaryotic, cousin unclear	0.836224	83.5	82.9	DRAB5-RELATED	0.2327	10584	Rab subfamily of small GTPases	0.149102	10798	10903	Unknown
COG000162	VtoE	5759	Entamoeba histolytica	2732007	Nucleocytoviricota	origin = eukaryotic	1.1102	96.3	90.3	UBIQUITIN CARBOXYL-TERMINAL HYDROLASE	1	1081	Belongs to the peptidase C19 family	0.372835	1097	1116	Cytoplasm
COG000056	VtoE	5759	Entamoeba histolytica	Weakly supported	Weakly supported	origin = virus, sister unclear	1.01252	82.9	94	EXPRESSED PROTEIN	1	1	ATPase activity, uncoupled	0.985007	2201	2227	Cytoplasm
COG000134	VtoE	5759	Entamoeba histolytica	Weakly supported	Weakly supported	origin = unkn, long branching recipient	2.38334	84.7	92.2	THYMIDINE KINASE	1	1074	Thymidine kinase	0.408831	1223	1242	Nucleus
COG000236	VtoE	5759	Entamoeba histolytica	Weakly supported	Weakly supported	origin = virus, long branching recipient	1.94522	87.4	92.4	EUKARYOTIC TRANSLATION INITIATION FACTOR 4E RELATED	1	839	translation initiation factor activity	0.395514	847	913	Cytoplasm
COG000032	VtoE	370355	Entamoeba invadens IP1	Weakly supported	Weakly supported	origin = eukaryotic, long branching recipient	1.51144	83.5	80.5	THIOREDOXIN	0.4056	1383	Belongs to the thioredoxin family	0.394606	3226	3257	Cytoplasm
COG000056	VtoE	370355	Entamoeba invadens IP1	Weakly supported	Weakly supported	origin = virus, sister unclear	0.499065	87.9	99.4	EXPRESSED PROTEIN	1	1	ATPase activity, uncoupled	0.985007	2201	2227	Nucleus
COG005423	VtoE	370355	Entamoeba invadens IP1	Weakly supported	Weakly supported	origin = virus, long branching recipient	1.47521	99.2	root	No annotation	0	0	ATPase activity, uncoupled	1	19	19	Nucleus
COG000139	VtoE	2759	Eukaryota	10239	Viruses	origin = unkn	0.269107	95.6	83	DTDP-D-GLUCOSE 4,6-DEHYDRATASE-RELATED	0.7699	969	dTDP-glucose 4,6-dehydratase activity	0.372171	1193	1220	Cytoplasm
COG000139	VtoE	2759	Eukaryota	10239	Viruses	origin = eukaryotic	0.123374	97.5	89.1	DTDP-D-GLUCOSE 4,6-DEHYDRATASE-RELATED	0.7699	969	dTDP-glucose 4,6-dehydratase activity	0.372171	1193	1220	Cytoplasm
COG000153	VtoE	2759	Eukaryota	10239	Viruses	origin = eukaryotic	0.065892	90.4	81.2	CRYPTOCHROME	0.9979	964	FAD binding domain of DNA photolyase	0.221429	1120	1136	Nucleus
COG000172	VtoE	2759	Eukaryota	10239	Viruses	origin = prokaryotic	0.154448	82.3	95.9	TRANSAMINASE	0.9885	260	Belongs to the DegT DnrJ EryC1 family	0.512605	1071	1084	Peroxisome
COG000203	VtoE	2759	Eukaryota	10239	Viruses	origin = unkn	0.204123	80.2	80.2	MICROTUBULE-ASSOCIATED PROTEINS 1A/1B LIGHT CHAIN 3-RELATED	0.999	954	Belongs to the ATG8 family	0.387565	965	987	Cytoplasm
COG000272	VtoE	2759	Eukaryota	10239	Viruses	origin = unkn, cousin unclear	0.273573	94.5	95.2	FLAP ENDONUCLEASE FAMILY MEMBER	0.9927	546	Structure-specific nuclease with 5'-flap endonuclease and 5'-3' exonuclease activities involved in DNA replication and repair	0.751225	816	826	Nucleus
COG000357	VtoE	2759	Eukaryota	10239	Viruses	origin = unkn	0.106663	94.2	94.9	HISTONE ACETYLTRANSFERASE-RELATED	1	517	radical SAM domain protein	0.355224	670	682	Peroxisome
COG000378	VtoE	2759	Eukaryota	10239	Viruses	origin = prokaryotic	0.6099	96.6	92.4	NICOTINAMIDE PHOSPHORIBOSYLTRANSFERASE	1	487	nicotinate-nucleotide diphosphorylase (carboxylating) activity	0.483721	645	651	Cytoplasm
COG000379	VtoE	2759	Eukaryota	10239	Viruses	origin = prokaryotic, cousin unclear	0.414411	88.6	82	EBNA2 BINDING PROTEIN P100	1	233	Staphylococcal nuclease homologue	0.806641	512	650	Cytoplasm
COG000422	VtoE	2759	Eukaryota	10239	Viruses	origin = virus	0.491823	95	90.4	MITOGEN-ACTIVATED PROTEIN KINASE	0.415	600	Protein kinase domain	0.234219	602	610	Cytoplasm
COG000422	VtoE	2759	Eukaryota	10239	Viruses	origin = virus	0.084284	95	90.4	MITOGEN-ACTIVATED PROTEIN KINASE	0.415	600	Protein kinase domain	0.234219	602	610	Nucleus
COG000549	VtoE	2759	Eukaryota	10239	Viruses	origin = unkn	0.195232	81	89.8	BCS1 AAA-TYPE ATPASE	0.9869	459	Belongs to the AAA ATPase family	0.298387	496	516	Cytoplasm
COG000710	VtoE	2759	Eukaryota	10239	Viruses	origin = unkn	0.154881	85.5	90.2	EIF-1A	0.9951	406	Seems to be required for maximal rate of protein biosynthesis	0.707617	407	423	Nucleus
COG000782	VtoE	2759	Eukaryota	10239	Viruses	origin = eukaryotic, cousin unclear	0.132516	96.6	85.7	OS06G0652100 PROTEIN	1	327	Domain of unknown function (DUF2828)	0.884021	388	393	Nucleus
COG000821	VtoE	2759	Eukaryota	10239	Viruses	origin = eukaryotic, cousin unclear	0.308376	81.9	86.6	RAN GTPASE	0.967	364	GTP-binding protein involved in nucleocytoplasmic transport	0.651351	370	376	Cytoplasm
COG000853	VtoE	2759	Eukaryota	10239	Viruses	origin = virus	0.134571	99.2	root	STRUCTURE-SPECIFIC ENDONUCLEASE SUBUNIT SLX1	1	354	Structure-specific endonuclease subunit	0.60452	354	368	Nucleus
COG001085	VtoE	2759	Eukaryota	10239	Viruses	origin = prokaryotic	0.108188	82.3	89.7	No annotation	0	0	cephalosporin hydroxylase	0.764706	289	299	Extracellular
COG001104	VtoE	2759	Eukaryota	10239	Viruses	origin = virus	0.645543	92.2	88.9	DNA GYRASE/TOPOISOMERASE SUBUNIT A	0.9857	140	A type II topoisomerase that negatively supercoils closed circular double-stranded (ds) DNA in an ATP-dependent manner to modulate DNA topology and maintain chromosomes in an underwound state	0.569966	293	294	Plastid
COG001340	VtoE	2759	Eukaryota	10239	Viruses	origin = virus	0.243654	80.3	95.3	BETA-1,3-GALACTOSYLTRANSFERASE 6	0.3333	3	negative regulation of septation initiation signaling	0.589109	202	246	Golgi_apparatus
COG001544	VtoE	2759	Eukaryota	10239	Viruses	origin = eukaryotic, cousin unclear	0.110809	83.5	87.2	PHYTANOYL-COA DIOXYGENASE-RELATED-RELATED	1	189	Phytanoyl-CoA dioxygenase (PhyH)	0.973404	188	213	Cytoplasm
COG001779	VtoE	2759	Eukaryota	10239	Viruses	origin = virus	0.201862	91.5	85.9	FORMAMIDOPYRIMIDINE-DNA GLYCOSYLASE	0.7517	145	Formamidopyrimidine-DNA glycosylase H2TH domain	0.854749	179	185	Mitochondrion
COG001801	VtoE	2759	Eukaryota	10239	Viruses	origin = unkn	0.151582	89.1	97	RHAMNAN SYNTHESIS F	1	1	methyltransferase	0.588235	17	183	Cytoplasm
COG003083	VtoE	2759	Eukaryota	10239	Viruses	origin = unkn	0.31506	85.2	91.5	COLANIC ACID BIOSYNTHESIS PROTEIN WCAK	0.9474	19	Tetratricopeptide TPR_2 repeat protein	0.593023	86	88	Cytoplasm
COG003329	VtoE	2759	Eukaryota	10239	Viruses	origin = virus	0.252248	97.5	root	PROCOLLAGEN-LYSINE,2-OXOGLUTARATE 5-DIOXYGENASE/GLYCOSYLTRANSFERASE 25 FAMILY MEMBER	0.9737	38	procollagen-lysine 5-dioxygenase activity	0.5	50	74	Endoplasmic_reticulum
COG003484	VtoE	2759	Eukaryota	10239	Viruses	origin = virus	0.347329	85.4	root	CONSERVED PROTEIN	0.8333	6	protein-(glutamine-N5) methyltransferase activity	0.5	2	67	Extracellular
COG004243	VtoE	2759	Eukaryota	10239	Viruses	origin = virus	0.176421	97.1	root	OPTIC ATROPHY 3 PROTEIN OPA3	1	1	no annotation	0	0	41	Cytoplasm
COG004778	VtoE	2759	Eukaryota	10239	Viruses	origin = virus	0.46924	94	root	ACID AMIDASE	1	26	lipid metabolic process	0.615385	26	29	Peroxisome
COG000826	VtoE	2759	Eukaryota	10240	Poxviridae	origin = eukaryotic	0.497342	81.1	91.9	MRNA-CAPPING ENZYME	0.9972	363	Bifunctional mRNA-capping enzyme exhibiting RNA 5'- triphosphatase activity in the N-terminal part and mRNA guanylyltransferase activity in the C-terminal part	0.190349	373	375	Nucleus
COG001002	VtoE	2759	Eukaryota	10501	Phycodnaviridae	origin = prokaryotic	0.323962	91.1	83.1	PROLYL 4-HYDROXYLASE ALPHA SUBUNIT	1	74	2OG-Fe(II) oxygenase superfamily	0.488372	301	326	Unknown
COG000043	VtoE	2759	Eukaryota	10662	Myoviridae	origin = unkn	0.325736	93.6	85.2	THYMIDYLATE SYNTHASE 1	0.701	2381	Thymidylate synthase	0.35328	2607	2647	Cytoplasm
COG000043	VtoE	2759	Eukaryota	12429	unclassified viruses	origin = unkn	0.144468	83.6	83	THYMIDYLATE SYNTHASE 1	0.701	2381	Thymidylate synthase	0.35328	2607	2647	Mitochondrion
COG000698	VtoE	2759	Eukaryota	346673	Coccolithovirus	origin = virus, cousin unclear	0.109443	94.7	97	OS06G0652100 PROTEIN	0.9965	285	Domain of unknown function (DUF2828)	0.988166	338	430	Cytoplasm
COG000108	VtoE	2759	Eukaryota	455363	unclassified Phycodnaviridae	origin = eukaryotic, cousin unclear	0.688342	88.3	89.1	DNA POLYMERASE TYPE-X FAMILY MEMBER	0.7341	1245	DNA ligase (NAD+) activity	0.532909	1413	1460	Nucleus
COG000482	VtoE	2759	Eukaryota	455363	unclassified Phycodnaviridae	origin = eukaryotic	0.235121	90.8	85	RIBONUCLEASE H1	0.9981	530	Endonuclease that specifically degrades the RNA of RNA- DNA hybrids	0.539162	549	565	Nucleus
COG000770	VtoE	2759	Eukaryota	455363	unclassified Phycodnaviridae	origin = eukaryotic	0.347001	94.3	94.1	GLCNAC TRANSFERASE-RELATED	1	318	Glycosyltransferase (GlcNAc)	0.845758	389	396	Extracellular
COG001004	VtoE	2759	Eukaryota	455363	unclassified Phycodnaviridae	origin = unkn	0.155593	89.9	91.4	ADENYLOSUCCINATE LYASE	0.9942	173	Belongs to the lyase 1 family	0.873457	324	326	Cytoplasm
COG001408	VtoE	2759	Eukaryota	455363	unclassified Phycodnaviridae	origin = eukaryotic	0.093418	83.5	97.4	MRNA GUANINE-7- METHYLTRANSFERASE	1	226	Belongs to the class I-like SAM-binding methyltransferase superfamily	0.586207	232	234	Nucleus
COG002381	VtoE	2759	Eukaryota	455363	unclassified Phycodnaviridae	origin = eukaryotic	0.857238	95.8	97.6	NUCLEOTIDYL TRANSFERASE	0.375	8	Nucleotidyl transferase	0.739837	123	144	Cytoplasm
COG002535	VtoE	2759	Eukaryota	455363	unclassified Phycodnaviridae	origin = virus	0.24629	89	99.9	BETA-1,4-MANNOSYL-GLYCOPROTEIN BETA-1,4-N-ACETYLGLUCOSAMINYL-TRANSFERASE	0.5385	13	transferase activity, transferring glycosyl groups	0.967213	122	131	Cytoplasm
COG001350	VtoE	2759	Eukaryota	549779	Mimiviridae	origin = virus	0.158087	92.7	90	TRNA(ILE)-LYSIDINE SYNTHASE-RELATED	1	230	tRNA processing	0.482759	232	244	Cytoplasm
COG000249	VtoE	2759	Eukaryota	985780	unclassified Mimiviridae	origin = eukaryotic, cousin unclear	0.09112	93.4	97.8	PROTEASE FAMILY S9A OLIGOPEPTIDASE	0.6147	558	Prolyl oligopeptidase, N-terminal beta-propeller domain	0.272311	874	881	Cytoplasm
COG002048	VtoE	2759	Eukaryota	985780	unclassified Mimiviridae	origin = prokaryotic	0.129772	97.4	87.1	L-GULONOLACTONE OXIDASE	0.5882	17	FAD binding domain	0.521739	161	161	Cytoplasm
COG000657	VtoE	2759	Eukaryota	1513234	Cafeteriavirus	origin = eukaryotic, cousin unclear	0.110723	94	96.7	LEUCYL-TRNA SYNTHETASE	1	293	Belongs to the class-I aminoacyl-tRNA synthetase family	0.708241	449	451	Cytoplasm
COG005112	VtoE	2759	Eukaryota	1513234	Cafeteriavirus	origin = unkn, cousin unclear	0.547045	88.3	96.6	No annotation	0	0	Protein of unknown function (DUF3804)	0.909091	22	24	Cytoplasm
COG002381	VtoE	2759	Eukaryota	1586712	Yellowstone lake mimivirus	origin = prokaryotic	0.418432	99.6	91.8	NUCLEOTIDYL TRANSFERASE	0.375	8	Nucleotidyl transferase	0.739837	123	144	Cytoplasm
COG000139	VtoE	2759	Eukaryota	2023203	Pithoviridae	origin = unkn	0.051763	96.3	96.1	DTDP-D-GLUCOSE 4,6-DEHYDRATASE-RELATED	0.7699	969	dTDP-glucose 4,6-dehydratase activity	0.372171	1193	1220	Cytoplasm
COG005075	VtoE	2759	Eukaryota	2080449	Acanthamoeba castellanii medusavirus	origin = virus	0.11329	83.9	root	DNA MISMATCH REPAIR PROTEIN MUTS FAMILY MEMBER	1	1	Domain of unknown function (DUF4804)	0.958333	24	24	Cytoplasm
COG000030	VtoE	2759	Eukaryota	2506608	Mimivirus LCMiAC01	origin = eukaryotic	0.102515	93	85.8	UBIQUITIN-CONJUGATING ENZYME E2	0.9944	3206	protein modification by small protein conjugation	0.406107	3275	3304	Nucleus
COG000023	VtoE	2759	Eukaryota	2732007	Nucleocytoviricota	origin = eukaryotic	0.606438	92.5	91.3	MYOSIN	0.6258	3771	translation initiation factor activity	0.423998	3842	3892	Nucleus
COG000038	VtoE	2759	Eukaryota	2732007	Nucleocytoviricota	origin = unkn	0.0610796	85.3	87.8	DNA-DIRECTED RNA POLYMERASE	0.9996	2582	DNA-dependent RNA polymerase catalyzes the transcription of DNA into RNA using the four ribonucleoside triphosphates as substrates	0.704619	2793	2889	Cytoplasm
COG000113	VtoE	2759	Eukaryota	2732007	Nucleocytoviricota	origin = eukaryotic	0.248136	94	92.1	UBIQUITIN	0.9609	1279	ubiquitin	0.414104	1333	1402	Cytoplasm
COG000113	VtoE	2759	Eukaryota	2732007	Nucleocytoviricota	origin = eukaryotic	0.087949	90.9	84.2	UBIQUITIN	0.9609	1279	ubiquitin	0.414104	1333	1402	Nucleus
COG000137	VtoE	2759	Eukaryota	2732007	Nucleocytoviricota	origin = virus	0.10948	91.5	96.7	REPLICATION FACTOR C / DNA POLYMERASE III GAMMA-TAU SUBUNIT	0.9991	1056	Part of the RFC clamp loader complex which loads the PCNA sliding clamp onto DNA	0.14134	1224	1230	Cytoplasm
COG000172	VtoE	2759	Eukaryota	2732007	Nucleocytoviricota	origin = unkn, cousin unclear	0.447957	100	91.3	TRANSAMINASE	0.9885	260	Belongs to the DegT DnrJ EryC1 family	0.512605	1071	1084	Cytoplasm
COG000172	VtoE	2759	Eukaryota	2732007	Nucleocytoviricota	origin = unkn	0.27566	100	92.1	TRANSAMINASE	0.9885	260	Belongs to the DegT DnrJ EryC1 family	0.512605	1071	1084	Peroxisome
COG000203	VtoE	2759	Eukaryota	2732007	Nucleocytoviricota	origin = eukaryotic, cousin unclear	0.239413	86.8	89.7	MICROTUBULE-ASSOCIATED PROTEINS 1A/1B LIGHT CHAIN 3-RELATED	0.999	954	Belongs to the ATG8 family	0.387565	965	987	Cytoplasm
COG000203	VtoE	2759	Eukaryota	2732007	Nucleocytoviricota	origin = unkn, cousin unclear	0.980713	92.8	82.5	MICROTUBULE-ASSOCIATED PROTEINS 1A/1B LIGHT CHAIN 3-RELATED	0.999	954	Belongs to the ATG8 family	0.387565	965	987	Mitochondrion
COG000356	VtoE	2759	Eukaryota	2732007	Nucleocytoviricota	origin = eukaryotic	0.290231	86.3	94.5	THIAMINE PYROPHOSPHATE ENZYMES	0.9805	359	Belongs to the TPP enzyme family	0.257016	677	684	Extracellular
COG000356	VtoE	2759	Eukaryota	2732007	Nucleocytoviricota	origin = unkn	0.11908	95	99.6	THIAMINE PYROPHOSPHATE ENZYMES	0.9805	359	Belongs to the TPP enzyme family	0.257016	677	684	Mitochondrion
COG000381	VtoE	2759	Eukaryota	2732007	Nucleocytoviricota	origin = unkn	0.112068	99.9	100	GDP-L-FUCOSE SYNTHASE	0.9973	370	Catalyzes the two-step NADP-dependent conversion of GDP- 4-dehydro-6-deoxy-D-mannose to GDP-fucose, involving an epimerase and a reductase reaction	0.416149	644	646	Cytoplasm
COG000450	VtoE	2759	Eukaryota	2732007	Nucleocytoviricota	origin = prokaryotic, cousin unclear	0.163893	99	90.4	INOSINE-5-MONOPHOSPHATE DEHYDROGENASE RELATED	0.9438	427	Catalyzes the conversion of inosine 5'-phosphate (IMP) to xanthosine 5'-phosphate (XMP), the first committed and rate- limiting step in the de novo synthesis of guanine nucleotides, and therefore plays an important role in the regulation of cell growth	0.698795	581	589	Plastid
COG000484	VtoE	2759	Eukaryota	2732007	Nucleocytoviricota	origin = eukaryotic	0.379097	99.3	96.5	FATTY ACID DESATURASE 2	1	224	Fatty acid desaturase	0.389587	557	564	Endoplasmic_reticulum
COG000528	VtoE	2759	Eukaryota	2732007	Nucleocytoviricota	origin = prokaryotic	0.1196	87.3	89.7	METHIONINE AMINOPEPTIDASE 2	1	325	Removes the N-terminal methionine from nascent proteins	0.490566	530	533	Cytoplasm
COG000710	VtoE	2759	Eukaryota	2732007	Nucleocytoviricota	origin = virus	0.085515	87.1	83.2	EIF-1A	0.9951	406	Seems to be required for maximal rate of protein biosynthesis	0.707617	407	423	Nucleus
COG000738	VtoE	2759	Eukaryota	2732007	Nucleocytoviricota	origin = virus	0.323082	86.5	84.1	REPLICATION FACTOR C / DNA POLYMERASE III GAMMA-TAU SUBUNIT	1	389	DNA polymerase III, delta subunit	0.355164	397	408	Cytoplasm
COG000970	VtoE	2759	Eukaryota	2732007	Nucleocytoviricota	origin = prokaryotic	0.221614	92.5	99.5	UV-DAMAGE ENDONUCLEASE	1	178	UV-endonuclease UvdE	0.419453	329	335	Nucleus
COG001208	VtoE	2759	Eukaryota	2732007	Nucleocytoviricota	origin = virus	0.194497	94.8	95.5	STRUCTURE-SPECIFIC ENDONUCLEASE SUBUNIT SLX1	1	252	Catalytic subunit of the slx1-slx4 structure-specific endonuclease that resolves DNA secondary structures generated during DNA repair and recombination	0.313901	223	272	Nucleus
COG001220	VtoE	2759	Eukaryota	2732007	Nucleocytoviricota	origin = prokaryotic, cousin unclear	0.064914	95.9	94.5	UDP-GALACTOPYRANOSE MUTASE	1	119	UDP-galactopyranose mutase	0.799257	269	270	Cytoplasm
COG002219	VtoE	2759	Eukaryota	2732007	Nucleocytoviricota	origin = prokaryotic	0.203494	84.6	92.1	KDEL LYS-ASP-GLU-LEU CONTAINING - RELATED	0.9091	22	Glycosyl transferase family 90	0.635762	151	153	Nucleus
COG003142	VtoE	2759	Eukaryota	2732007	Nucleocytoviricota	origin = virus	0.223365	100	root	PROTEIN STAR	0.6667	3	transferase activity	0.25	8	85	Golgi_apparatus
COG003170	VtoE	2759	Eukaryota	2732007	Nucleocytoviricota	origin = unkn, cousin unclear	0.655403	91.8	90.5	No annotation	0	0	no annotation	0	0	83	Endoplasmic_reticulum
COG004036	VtoE	2759	Eukaryota	2732007	Nucleocytoviricota	origin = virus	0.240171	root	root	GTPASE-ACTIVATING PROTEIN	1	1	negative regulation of Ras protein signal transduction	1	2	46	Endoplasmic_reticulum
COG005459	VtoE	2759	Eukaryota	2732007	Nucleocytoviricota	origin = unkn	0.3092	88.7	81.5	DUF946 FAMILY PROTEIN	1	12	Pfam:DUF946	0.6	15	19	Cytoplasm
COG005506	VtoE	2759	Eukaryota	2732007	Nucleocytoviricota	origin = virus	0.298038	89.6	root	No annotation	0	0	no annotation	0	0	19	Cytoplasm
COG000209	VtoE	2759	Eukaryota	2732523	Megaviricetes	origin = unkn	0.21938	97.4	93.9	ALPHA-KETOGLUTARATE-DEPENDENT DIOXYGENASE ALKB HOMOLOG 3	0.6376	356	2OG-Fe(II) oxygenase superfamily	0.391032	959	973	Nucleus
COG000209	VtoE	2759	Eukaryota	2732523	Megaviricetes	origin = eukaryotic, cousin unclear	0.282768	84.4	85.1	ALPHA-KETOGLUTARATE-DEPENDENT DIOXYGENASE ALKB HOMOLOG 3	0.6376	356	2OG-Fe(II) oxygenase superfamily	0.391032	959	973	Nucleus
COG000356	VtoE	2759	Eukaryota	2732523	Megaviricetes	origin = eukaryotic	0.167463	87.5	89.8	THIAMINE PYROPHOSPHATE ENZYMES	0.9805	359	Belongs to the TPP enzyme family	0.257016	677	684	Mitochondrion
COG000617	VtoE	2759	Eukaryota	2732523	Megaviricetes	origin = prokaryotic	0.466476	84	82.7	MANNOSYL PHOSPHORYLINOSITOL CERAMIDE SYNTHASE	0.8295	387	Glycosyltransferase sugar-binding region containing DXD motif	0.876126	444	477	Golgi_apparatus
COG002322	VtoE	2759	Eukaryota	2732523	Megaviricetes	origin = eukaryotic	0.146184	98.6	83.9	TRANSCRIPTION TERMINATION FACTOR 2-RELATED	0.9078	141	N-methyltransferase activity	0.858156	141	148	Nucleus
COG002739	VtoE	2759	Eukaryota	2732523	Megaviricetes	origin = virus	0.341175	87.5	83.6	RING FINGER AND SWIM DOMAIN-CONTAINING PROTEIN 2	0.9904	104	Ring finger	0.303922	102	111	Nucleus
COG004576	VtoE	2759	Eukaryota	2732523	Megaviricetes	origin = virus	0.226047	83.8	89.2	No annotation	0	0	REJ domain	1	30	33	Nucleus
COG005611	VtoE	2759	Eukaryota	2732523	Megaviricetes	origin = virus	0.429725	root	root	No annotation	0	0	no annotation	0	0	18	Nucleus
COG000209	VtoE	2759	Eukaryota	2732555	Pimascovirales	origin = unkn, cousin unclear	0.271784	92.3	81.6	ALPHA-KETOGLUTARATE-DEPENDENT DIOXYGENASE ALKB HOMOLOG 3	0.6376	356	2OG-Fe(II) oxygenase superfamily	0.391032	959	973	Nucleus
COG000646	VtoE	2759	Eukaryota	2732555	Pimascovirales	origin = virus	0.078931	100	root	DNA TOPOISOMERASE I	0.995	403	DNA Topoisomerase I (eukaryota)	0.315556	450	457	Nucleus
COG000003	VtoE	2759	Eukaryota	Weakly supported	Weakly supported	origin = eukaryotic, long branching recipient	0.288924	100	90.6	ATP-DEPENDENT RNA HELICASE	0.4875	2482	RNA-protein covalent cross-linking	0.962677	11387	12749	Mitochondrion
COG000014	VtoE	2759	Eukaryota	Weakly supported	Weakly supported	origin = eukaryotic, long branching recipient	2.618	87.7	88.1	DNAJ HOMOLOG SUBFAMILY C MEMBER	0.3541	3253	ATP binding to DnaK triggers the release of the substrate protein, thus completing the reaction cycle	0.315643	5747	5826	Nucleus
COG000024	VtoE	2759	Eukaryota	Weakly supported	Weakly supported	origin = eukaryotic, long branching recipient	1.96451	84.9	81.5	DNA-DIRECTED RNA POLYMERASE I SUBUNIT 2	0.9997	3308	DNA-dependent RNA polymerase catalyzes the transcription of DNA into RNA using the four ribonucleoside triphosphates as substrates	0.58331	3511	3673	Cytoplasm
COG000024	VtoE	2759	Eukaryota	Weakly supported	Weakly supported	origin = unkn, long branching recipient	1.36966	86.1	80.6	DNA-DIRECTED RNA POLYMERASE I SUBUNIT 2	0.9997	3308	DNA-dependent RNA polymerase catalyzes the transcription of DNA into RNA using the four ribonucleoside triphosphates as substrates	0.58331	3511	3673	Nucleus
COG000055	VtoE	2759	Eukaryota	Weakly supported	Weakly supported	origin = eukaryotic, long branching recipient	0.95333	81.7	93.3	DNA TOPOISOMERASE/GYRASE	0.9857	2162	Control of topological states of DNA by transient breakage and subsequent rejoining of DNA strands	0.471552	2197	2268	Nucleus
COG000068	VtoE	2759	Eukaryota	Weakly supported	Weakly supported	origin = unkn, long branching donor	0.51363	93	89.3	RIBONUCLEOSIDE-DIPHOSPHATE REDUCTASE SMALL CHAIN	0.9972	1762	Ribonucleotide reductase, small chain	0.392931	1924	1961	Cytoplasm
COG000069	VtoE	2759	Eukaryota	Weakly supported	Weakly supported	origin = eukaryotic, long branching recipient	0.467618	89.6	89.4	ENZYMATIC POLYPROTEIN-RELATED	0.9934	1372	polyprotein	0.647557	1535	1954	Cytoplasm
COG000092	VtoE	2759	Eukaryota	Weakly supported	Weakly supported	origin = virus, long branching recipient	2.14133	100	100	No annotation	0	0	Mononegavirales mRNA-capping region V	1	1569	1597	Unknown
COG000114	VtoE	2759	Eukaryota	Weakly supported	Weakly supported	origin = prokaryotic, long branching recipient	1.44751	89.9	81.5	RIBONUCLEASE III	0.5405	840	rRNA catabolic process	0.737232	1351	1392	Cytoplasm
COG000315	VtoE	2759	Eukaryota	Weakly supported	Weakly supported	origin = unkn, long branching donor	0.383304	99.9	100	DNA-DIRECTED RNA POLYMERASE, MITOCHONDRIAL	1	682	DNA-directed RNA polymerase activity	0.502008	747	750	Mitochondrion
COG000417	VtoE	2759	Eukaryota	Weakly supported	Weakly supported	origin = eukaryotic, long branching recipient	0.815065	93.2	98	FRUCTOSE-1,6-BISPHOSPHATASE-RELATED	0.9979	466	Belongs to the FBPase class 1 family	0.504039	619	621	Cytoplasm
COG000747	VtoE	2759	Eukaryota	Weakly supported	Weakly supported	origin = prokaryotic, long branching donor	0.761413	87.1	85.8	DEOXYNUCLEOSIDE KINASE	0.9859	71	Deoxynucleoside kinase	0.404938	405	405	Cytoplasm
COG000782	VtoE	2759	Eukaryota	Weakly supported	Weakly supported	origin = unkn, long branching recipient	2.69375	91.9	98.3	OS06G0652100 PROTEIN	1	327	Domain of unknown function (DUF2828)	0.884021	388	393	Cytoplasm
COG000802	VtoE	2759	Eukaryota	Weakly supported	Weakly supported	origin = eukaryotic, long branching recipient	1.85565	94.9	91	N-MYRISTOYL TRANSFERASE	0.9974	381	Adds a myristoyl group to the N-terminal glycine residue of certain cellular proteins	0.794271	384	387	Mitochondrion
COG001009	VtoE	2759	Eukaryota	Weakly supported	Weakly supported	origin = virus, long branching donor	0.154495	92	root	CASEIN KINASE-RELATED	0.9937	316	protein serine/threonine kinase activity	0.537267	322	323	Nucleus
COG001147	VtoE	2759	Eukaryota	Weakly supported	Weakly supported	origin = eukaryotic, long branching donor	0.252566	83.8	root	RING BOX	0.9929	280	Anaphase-promoting complex subunit 11 RING-H2 finger	0.353357	283	286	Nucleus
COG001309	VtoE	2759	Eukaryota	Weakly supported	Weakly supported	origin = virus, long branching donor	0.465217	98.2	root	CYTIDYLYLTRANSFERASE	0.9719	249	Cytidylyltransferase-like	0.31746	252	252	Nucleus
COG001456	VtoE	2759	Eukaryota	Weakly supported	Weakly supported	origin = virus, sister unclear	0.170548	86.4	root	APG9 AUTOPHAGY 9	0.9954	218	Involved in autophagy and cytoplasm to vacuole transport (Cvt) vesicle formation	0.660633	221	225	Cell_membrane
COG001597	VtoE	2759	Eukaryota	Weakly supported	Weakly supported	origin = virus, long branching donor	0.388576	87.9	root	MEMBRANE-ASSOCIATED PROGESTERONE RECEPTOR COMPONENT-RELATED	1	197	endoplasmic reticulum organization	0.372549	204	206	Endoplasmic_reticulum
COG001631	VtoE	2759	Eukaryota	Weakly supported	Weakly supported	origin = prokaryotic, long branching recipient	1.1003	root	root	7-CYANO-7-DEAZAGUANINE SYNTHASE	0.9808	52	Catalyzes the ATP-dependent conversion of 7-carboxy-7- deazaguanine (CDG) to 7-cyano-7-deazaguanine (preQ(0))	0.777228	202	202	Plastid
COG001708	VtoE	2759	Eukaryota	Weakly supported	Weakly supported	origin = virus, long branching donor	0.688977	99.2	84.5	SUGAR FERMENTATION STIMULATION PROTEIN A	1	178	Belongs to the SfsA family	0.55814	86	192	Nucleus
COG002455	VtoE	2759	Eukaryota	Weakly supported	Weakly supported	origin = virus, long branching donor	0.22578	93	93.8	DEAD/H RNA HELICASE, PUTATIVE-RELATED	0.9444	126	helicase activity	0.674419	129	138	Cytoplasm
COG003216	VtoE	2759	Eukaryota	Weakly supported	Weakly supported	origin = virus, sister unclear	0.796288	81.5	95.6	RIBOSOMAL PROTEIN S6 KINASE	0.475	80	protein serine/threonine kinase activity	0.975	80	80	Cytoplasm
COG003946	VtoE	2759	Eukaryota	Weakly supported	Weakly supported	origin = virus, long branching donor	0.932104	root	root	LECITHIN-CHOLESTEROL ACYLTRANSFERASE-RELATED	1	45	Lecithin:cholesterol acyltransferase	0.25	48	49	Cytoplasm
COG000110	VtoE	6072	Eumetazoa	10239	Viruses	origin = eukaryotic	0.038392	93.9	90.3	DEOXYURIDINE 5'-TRIPHOSPHATE NUCLEOTIDOHYDROLASE	1	940	dUTPase	0.432432	1406	1412	Cytoplasm
COG001488	VtoE	6072	Eumetazoa	10239	Viruses	origin = virus	0.137338	93.6	99.8	ANNEXIN	0.9341	182	Patatin-like phospholipase	0.666667	216	220	Cytoplasm
COG000098	VtoE	6072	Eumetazoa	10491	Chloriridovirus	origin = eukaryotic, cousin unclear	0.472237	89.6	81.6	DUAL SPECIFICITY PROTEIN PHOSPHATASE	0.3823	1512	Dual specificity phosphatase, catalytic domain	0.230013	1526	1556	Cytoplasm
COG000069	VtoE	6072	Eumetazoa	Weakly supported	Weakly supported	origin = virus, long branching recipient	0.428811	82	95.8	ENZYMATIC POLYPROTEIN-RELATED	0.9934	1372	polyprotein	0.647557	1535	1954	Cytoplasm
COG000019	VtoE	1519565	Fistulifera solaris	10501	Phycodnaviridae	origin = eukaryotic	0.75099	94.4	80.6	HEAT SHOCK PROTEIN 70KDA	0.8288	3895	Belongs to the heat shock protein 70 family	0.27064	4530	4585	Cytoplasm
COG007730	VtoE	691883	Fonticula alba	1513234	Cafeteriavirus	origin = virus	0.750825	92.2	89.7	No annotation	0	0	Glycosyltransferase like family 2	1	3	8	Unknown
COG000043	VtoE	691883	Fonticula alba	Weakly supported	Weakly supported	origin = unkn, long branching recipient	1.25917	89.5	80.4	THYMIDYLATE SYNTHASE 1	0.701	2381	Thymidylate synthase	0.35328	2607	2647	Peroxisome
COG001340	VtoE	635003	Fragilariopsis cylindrus CCMP1102	10239	Viruses	origin = unkn, cousin unclear	1.77373	85.9	root	BETA-1,3-GALACTOSYLTRANSFERASE 6	0.3333	3	negative regulation of septation initiation signaling	0.589109	202	246	Golgi_apparatus
COG001274	VtoE	635003	Fragilariopsis cylindrus CCMP1102	10487	Iridovirus	origin = unkn, cousin unclear	1.67518	95.4	82.5	RIBITOL-5-PHOSPHATE XYLOSYLTRANSFERASE 1	0.8384	99	Haloacid dehalogenase-like hydrolase	0.357143	14	258	Nucleus
COG005990	VtoE	635003	Fragilariopsis cylindrus CCMP1102	12429	unclassified viruses	origin = virus	1.56731	87.9	99.7	HYPOXIA-INDUCIBLE FACTOR 1 ALPHA INHIBITOR-RELATED	1	12	Cupin superfamily protein	0.428571	7	15	Unknown
COG000049	VtoE	635003	Fragilariopsis cylindrus CCMP1102	1977639	Klosneuvirus	origin = eukaryotic	0.940706	83.3	99	CASEIN KINASE-RELATED	0.9962	2357	protein kinase activity	0.174385	2397	2444	Nucleus
COG000014	VtoE	635003	Fragilariopsis cylindrus CCMP1102	2732007	Nucleocytoviricota	origin = eukaryotic	0.819842	90.4	86.6	DNAJ HOMOLOG SUBFAMILY C MEMBER	0.3541	3253	ATP binding to DnaK triggers the release of the substrate protein, thus completing the reaction cycle	0.315643	5747	5826	Unknown
COG005151	VtoE	635003	Fragilariopsis cylindrus CCMP1102	2732007	Nucleocytoviricota	origin = virus	2.76206	98.9	89.2	No annotation	0	0	Glycosyl transferases group 1	0.8	5	23	Unknown
COG007848	VtoE	635003	Fragilariopsis cylindrus CCMP1102	2732523	Megaviricetes	origin = virus	4.65999	90.3	root	No annotation	0	0	regulation of nuclear-transcribed mRNA catabolic process, nonsense-mediated decay	1	1	7	Nucleus
COG000014	VtoE	635003	Fragilariopsis cylindrus CCMP1102	Weakly supported	Weakly supported	origin = eukaryotic, long branching recipient	1.738	92.3	98.3	DNAJ HOMOLOG SUBFAMILY C MEMBER	0.3541	3253	ATP binding to DnaK triggers the release of the substrate protein, thus completing the reaction cycle	0.315643	5747	5826	Extracellular
COG003349	VtoE	635003	Fragilariopsis cylindrus CCMP1102	Weakly supported	Weakly supported	origin = virus, long branching recipient	2.0913	83.4	82.2	ALPHA/BETA-HYDROLASES SUPERFAMILY PROTEIN	0.9538	65	Lipase (class 3)	0.761194	67	73	Golgi_apparatus
COG000639	VtoE	130081	Galdieria sulphuraria	10239	Viruses	origin = unkn, cousin unclear	0.665196	82.3	80.6	ZINC FINGER CCHC DOMAIN CONTAINING PROTEIN	0.7778	18	zinc finger	0.854881	379	461	Unknown
COG000283	VtoE	130081	Galdieria sulphuraria	2732007	Nucleocytoviricota	origin = eukaryotic, cousin unclear	0.837994	85	94.3	UNCHARACTERIZED	0.9871	542	2OG-Fe(II) oxygenase superfamily	0.224905	787	801	Unknown
COG001438	VtoE	130081	Galdieria sulphuraria	2732555	Pimascovirales	origin = eukaryotic, cousin unclear	2.09487	95.1	85.1	MANNOSYL PHOSPHORYLINOSITOL CERAMIDE SYNTHASE	1	181	Glycosyltransferase sugar-binding region containing DXD motif	0.502242	223	229	Golgi_apparatus
COG000235	VtoE	130081	Galdieria sulphuraria	Weakly supported	Weakly supported	origin = virus, long branching recipient	0.0475898	root	root	PHOTOSYSTEM II PROTEIN D1	1	844	Photosystem II (PSII) is a light-driven water plastoquinone oxidoreductase that uses light energy to abstract electrons from H(2)O, generating O(2) and a proton gradient subsequently used for ATP formation	0.519651	916	916	Lysosome/Vacuole
COG005020	VtoE	184922	Giardia lamblia ATCC 50803	10239	Viruses	origin = eukaryotic	1.41106	root	root	PROTEIN MTL1-RELATED	1	2	NUDIX domain	1	2	25	Unknown
COG000387	VtoE	184922	Giardia lamblia ATCC 50803	455363	unclassified Phycodnaviridae	origin = prokaryotic	1.30832	81.8	94.2	DNA-DIRECTED RNA POLYMERASES I, II, AND III SUBUNIT RPABC1	0.9977	426	DNA-dependent RNA polymerase catalyzes the transcription of DNA into RNA using the four ribonucleoside triphosphates as substrates	0.3312	625	639	Unknown
COG007485	VtoE	184922	Giardia lamblia ATCC 50803	880158	unclassified Prasinovirus	origin = eukaryotic	2.41347	83.4	root	PTHR43895	1	1	ubiquitin-protein transferase activity	1	1	8	Cytoplasm
COG000162	VtoE	184922	Giardia lamblia ATCC 50803	2732007	Nucleocytoviricota	origin = eukaryotic, cousin unclear	1.16988	94.3	99.1	UBIQUITIN CARBOXYL-TERMINAL HYDROLASE	1	1081	Belongs to the peptidase C19 family	0.372835	1097	1116	Cytoplasm
COG000168	VtoE	184922	Giardia lamblia ATCC 50803	Weakly supported	Weakly supported	origin = eukaryotic, long branching recipient	1.73377	86	91.3	CYCLINS	0.9915	1063	Belongs to the cyclin family	0.504178	1077	1091	Unknown
COG000523	VtoE	184922	Giardia lamblia ATCC 50803	Weakly supported	Weakly supported	origin = unkn, long branching recipient	1.32507	84.7	84	RIBONUCLEASE H1	1	267	Endonuclease that specifically degrades the RNA of RNA- DNA hybrids	0.740602	532	536	Unknown
COG000793	VtoE	184922	Giardia lamblia ATCC 50803	Weakly supported	Weakly supported	origin = eukaryotic, long branching recipient	1.59067	84.6	82.3	RING FINGER AND CHY ZINC FINGER DOMAIN-CONTAINING PROTEIN 1	0.9948	383	Zinc-ribbon	0.205729	384	388	Cytoplasm
COG002756	VtoE	184922	Giardia lamblia ATCC 50803	Weakly supported	Weakly supported	origin = virus, long branching recipient	3.59132	92.2	85.6	CLASS II CROSSOVER JUNCTION ENDONUCLEASE MUS81	1	105	ERCC4 domain	0.595745	94	110	Unknown
COG000109	VtoE	431595	Globisporangium ultimum DAOM BR144	10239	Viruses	origin = unkn	0.489094	100	96.5	CYTOSINE-SPECIFIC METHYLTRANSFERASE	0.5123	730	C-5 cytosine-specific DNA methylase	0.494406	1430	1459	Unknown
COG001353	VtoE	431595	Globisporangium ultimum DAOM BR144	2506594	Pithovirus LCPAC304	origin = virus	0.39546	86.8	80.8	IP01015P-RELATED	1	1	no annotation	0	0	243	Nucleus
COG000733	VtoE	431595	Globisporangium ultimum DAOM BR144	Weakly supported	Weakly supported	origin = unkn, long branching recipient	1.84989	97.9	93.8	POLYNUCLEOTIDYL TRANSFERASE, RIBONUCLEASE H-LIKE SUPERFAMILY PROTEIN	0.9701	268	RNase H	0.298246	399	412	Unknown
COG002643	VtoE	431595	Globisporangium ultimum DAOM BR144	Weakly supported	Weakly supported	origin = virus, long branching recipient	0.787355	89.2	88.4	No annotation	0	0	Major capsid protein N-terminus	1	109	120	Unknown
COG007429	VtoE	3847	Glycine max	2732523	Megaviricetes	origin = virus	1.85931	root	root	RING ZINC FINGER PROTEIN-RELATED	0.2857	7	ubiquitin-protein transferase activity	0.571429	7	8	Unknown
COG000069	VtoE	3847	Glycine max	Weakly supported	Weakly supported	origin = virus, long branching recipient	1.38046	82	95.8	ENZYMATIC POLYPROTEIN-RELATED	0.9934	1372	polyprotein	0.647557	1535	1954	Nucleus
COG000153	VtoE	3847	Glycine max	Weakly supported	Weakly supported	origin = eukaryotic, long branching recipient	1.48691	81.2	95.4	CRYPTOCHROME	0.9979	964	FAD binding domain of DNA photolyase	0.221429	1120	1136	Unknown
COG000235	VtoE	3847	Glycine max	Weakly supported	Weakly supported	origin = virus, long branching recipient	0.0931531	root	root	PHOTOSYSTEM II PROTEIN D1	1	844	Photosystem II (PSII) is a light-driven water plastoquinone oxidoreductase that uses light energy to abstract electrons from H(2)O, generating O(2) and a proton gradient subsequently used for ATP formation	0.519651	916	916	Unknown
COG004655	VtoE	3847	Glycine max	Weakly supported	Weakly supported	origin = virus, long branching donor	0.827486	83.3	root	RING ZINC FINGER PROTEIN-RELATED	0.7083	24	Zinc finger, C3HC4 type (RING finger)	0.421053	19	31	Extracellular
COG004387	VtoE	33097	Gonium pectorale	10239	Viruses	origin = virus	2.32531	91	85.2	PTHR12393:SF6	1	1	no annotation	0	0	37	Cytoplasm
COG000616	VtoE	33097	Gonium pectorale	985780	unclassified Mimiviridae	origin = eukaryotic	0.916369	98.5	82.1	3'-5' EXONUCLEASE ERI1-RELATED	0.9938	324	Exonuclease	0.316456	474	478	Nucleus
COG005409	VtoE	33097	Gonium pectorale	Weakly supported	Weakly supported	origin = virus, long branching recipient	15.3525	85.5	root	COLLAGEN ALPHA	0.6667	6	N-acetylmuramoyl-L-alanine amidase activity	1	19	20	Unknown
COG003270	VtoE	33834	Gonyaulacaceae	2732007	Nucleocytoviricota	origin = prokaryotic	0.607444	91.6	91.2	No annotation	0	0	lipolytic protein G-D-S-L family	0.714286	7	78	Extracellular
COG005776	VtoE	110365	Gregarina niphandrodes	10239	Viruses	origin = eukaryotic	2.14393	85.8	root	PHD AND RING FINGER DOMAIN-CONTAINING PROTEIN 1	0.625	8	acid-amino acid ligase activity	0.857143	14	16	Nucleus
COG000195	VtoE	110365	Gregarina niphandrodes	549779	Mimiviridae	origin = unkn	1.11572	80.2	89.5	URACIL-DNA GLYCOSYLASE	0.9941	847	Excises uracil residues from the DNA which can arise as a result of misincorporation of dUMP residues by DNA polymerase or due to deamination of cytosine	0.505976	1004	1012	Unknown
COG000056	VtoE	110365	Gregarina niphandrodes	Weakly supported	Weakly supported	origin = virus, sister unclear	1.20719	97.4	91.2	EXPRESSED PROTEIN	1	1	ATPase activity, uncoupled	0.985007	2201	2227	Unknown
COG000056	VtoE	110365	Gregarina niphandrodes	Weakly supported	Weakly supported	origin = virus, sister unclear	0.223551	97.4	91.2	EXPRESSED PROTEIN	1	1	ATPase activity, uncoupled	0.985007	2201	2227	Extracellular
COG000069	VtoE	110365	Gregarina niphandrodes	Weakly supported	Weakly supported	origin = eukaryotic, long branching recipient	0.90164	89.6	89.4	ENZYMATIC POLYPROTEIN-RELATED	0.9934	1372	polyprotein	0.647557	1535	1954	Unknown
COG000272	VtoE	110365	Gregarina niphandrodes	Weakly supported	Weakly supported	origin = unkn, long branching recipient	2.17763	88.1	87.8	FLAP ENDONUCLEASE FAMILY MEMBER	0.9927	546	Structure-specific nuclease with 5'-flap endonuclease and 5'-3' exonuclease activities involved in DNA replication and repair	0.751225	816	826	Nucleus
COG001007	VtoE	110365	Gregarina niphandrodes	Weakly supported	Weakly supported	origin = unkn, long branching recipient	1.31339	87.6	93.7	PROLINE IMINOPEPTIDASE	0.9824	170	Belongs to the peptidase S33 family	0.603715	323	324	Cytoplasm
COG001404	VtoE	110365	Gregarina niphandrodes	Weakly supported	Weakly supported	origin = eukaryotic, long branching recipient	1.81916	94.7	81.3	VESICLE PROTEIN SORTING-ASSOCIATED	1	232	Belongs to the STXBP unc-18 SEC1 family	0.51073	233	234	Unknown
COG001340	VtoE	905079	Guillardia theta CCMP2712	10239	Viruses	origin = virus	1.62351	80.3	95.3	BETA-1,3-GALACTOSYLTRANSFERASE 6	0.3333	3	negative regulation of septation initiation signaling	0.589109	202	246	Extracellular
COG005843	VtoE	905079	Guillardia theta CCMP2712	10239	Viruses	origin = virus	1.70985	84.2	root	UPSTREAM BINDING TRANSCRIPTION FACTOR	0.5	2	YABBY protein	1	3	16	Unknown
COG001308	VtoE	905079	Guillardia theta CCMP2712	12429	unclassified viruses	origin = unkn	1.14933	97.4	88	BETA-1,4-MANNOSYL-GLYCOPROTEIN BETA-1,4-N-ACETYLGLUCOSAMINYL-TRANSFERASE	1	147	Glycosyltransferase family 17	0.814655	232	252	Cytoplasm
COG000101	VtoE	905079	Guillardia theta CCMP2712	455363	unclassified Phycodnaviridae	origin = virus	0.382677	97.8	93.1	PHOSPHORYN, PUTATIVE-RELATED-RELATED	1	1	adenyl ribonucleotide binding	0.989933	1490	1535	Cytoplasm
COG000113	VtoE	905079	Guillardia theta CCMP2712	455363	unclassified Phycodnaviridae	origin = eukaryotic, cousin unclear	2.85e-06	98.4	80.2	UBIQUITIN	0.9609	1279	ubiquitin	0.414104	1333	1402	Endoplasmic_reticulum
COG000131	VtoE	905079	Guillardia theta CCMP2712	455363	unclassified Phycodnaviridae	origin = unkn	0.322804	87.9	97.7	3-5 EXONUCLEASE	0.5	2	Poxvirus Late Transcription Factor VLTF3 like	1	1227	1276	Unknown
COG000164	VtoE	905079	Guillardia theta CCMP2712	455363	unclassified Phycodnaviridae	origin = virus	0.708284	99.5	100	MRNA GUANINE-7- METHYLTRANSFERASE	0.9712	1008	mRNA (guanine-N7-)-methyltransferase activity	0.755814	1032	1114	Unknown
COG000502	VtoE	905079	Guillardia theta CCMP2712	455363	unclassified Phycodnaviridae	origin = prokaryotic	0.387849	96.8	90.6	CHROMOSOME-PARTITIONING PROTEIN PARB-RELATED	0.9655	29	Belongs to the ParB family	0.731397	551	552	Unknown
COG000718	VtoE	905079	Guillardia theta CCMP2712	455363	unclassified Phycodnaviridae	origin = virus	0.607165	99.7	93.8	TATA-BOX BINDING PROTEIN	1	3	Transcription factor TFIID (or TATA-binding protein, TBP)	1	370	421	Unknown
COG001138	VtoE	905079	Guillardia theta CCMP2712	455363	unclassified Phycodnaviridae	origin = unkn, cousin unclear	0.607901	85.9	98.7	PTHR46101	0.9559	136	Pyridoxal-dependent decarboxylase conserved domain	0.274306	288	288	Cytoplasm
COG005147	VtoE	905079	Guillardia theta CCMP2712	455363	unclassified Phycodnaviridae	origin = virus	2.43935	89.6	96.8	WD REPEAT, SAM AND U-BOX DOMAIN-CONTAINING PROTEIN 1	0.9091	11	Modified RING finger domain	0.4	5	23	Mitochondrion
COG005783	VtoE	905079	Guillardia theta CCMP2712	455363	unclassified Phycodnaviridae	origin = virus	1.76736	91.1	root	CALCIUM-INDEPENDENT PHOSPHOLIPASE A2 IPLA2 -RELATED	1	8	triglyceride catabolic process	0.5	8	16	Unknown
COG005992	VtoE	905079	Guillardia theta CCMP2712	455363	unclassified Phycodnaviridae	origin = virus	1.94138	89.4	root	LD02310P	0.8462	13	protein polyubiquitination	0.384615	13	15	Unknown
COG000593	VtoE	905079	Guillardia theta CCMP2712	549779	Mimiviridae	origin = eukaryotic	1.21787	83.2	80.8	WD REPEAT, SAM AND U-BOX DOMAIN-CONTAINING PROTEIN 1	0.7494	451	ubiquitin-protein transferase activity	0.326754	456	489	Unknown
COG000698	VtoE	905079	Guillardia theta CCMP2712	549779	Mimiviridae	origin = eukaryotic	0.471416	91.7	95.2	OS06G0652100 PROTEIN	0.9965	285	Domain of unknown function (DUF2828)	0.988166	338	430	Unknown
COG000698	VtoE	905079	Guillardia theta CCMP2712	549779	Mimiviridae	origin = virus	0.987644	84.7	97	OS06G0652100 PROTEIN	0.9965	285	Domain of unknown function (DUF2828)	0.988166	338	430	Unknown
COG001507	VtoE	905079	Guillardia theta CCMP2712	549779	Mimiviridae	origin = prokaryotic	1.18967	99.7	91.4	FATTY ACID DESATURASE 2	1	43	Fatty acid desaturase	0.714953	214	217	Endoplasmic_reticulum
COG009105	VtoE	905079	Guillardia theta CCMP2712	549779	Mimiviridae	origin = virus	1.66888	93.1	root	ANKYRIN REPEAT AND DEATH DOMAIN-CONTAINING PROTEIN	0.5	2	OTU-like cysteine protease	0.25	4	5	Cytoplasm
COG000014	VtoE	905079	Guillardia theta CCMP2712	2024608	Bodo saltans virus	origin = eukaryotic, cousin unclear	0.536907	90.3	92.4	DNAJ HOMOLOG SUBFAMILY C MEMBER	0.3541	3253	ATP binding to DnaK triggers the release of the substrate protein, thus completing the reaction cycle	0.315643	5747	5826	Unknown
COG003077	VtoE	905079	Guillardia theta CCMP2712	2506593	Pithovirus LCPAC302	origin = virus	1.27444	90.4	87.2	DNA POLYMERASE III SUBUNIT ALPHA	0.9434	53	DNA polymerase	0.288136	59	88	Cytoplasm
COG000782	VtoE	905079	Guillardia theta CCMP2712	2506606	Marseillevirus LCMAC202	origin = unkn	1.03462	87	90.9	OS06G0652100 PROTEIN	1	327	Domain of unknown function (DUF2828)	0.884021	388	393	Unknown
COG001332	VtoE	905079	Guillardia theta CCMP2712	2732007	Nucleocytoviricota	origin = prokaryotic	1.05776	92.6	87.6	METHYLTRANSFERASE, FKBM FAMILY PROTEIN	0.8	5	Methyltransferase FkbM domain	0.363636	33	248	Endoplasmic_reticulum
COG001882	VtoE	905079	Guillardia theta CCMP2712	2732007	Nucleocytoviricota	origin = eukaryotic	1.53913	87.8	98.5	RIBITOL-5-PHOSPHATE XYLOSYLTRANSFERASE 1	0.9375	16	no annotation	0	0	176	Endoplasmic_reticulum
COG002743	VtoE	905079	Guillardia theta CCMP2712	2732007	Nucleocytoviricota	origin = prokaryotic	1.24658	92.5	91.8	GLYCOSYLTRANSFERASE	1	67	Glycosyltransferase like family 2	0.59434	106	111	Extracellular
COG003057	VtoE	905079	Guillardia theta CCMP2712	2732007	Nucleocytoviricota	origin = unkn	1.11647	80.2	84.5	UNCHARACTERIZED	0.5	4	Expressed protein	0.844156	77	89	Cytoplasm
COG003670	VtoE	905079	Guillardia theta CCMP2712	2732007	Nucleocytoviricota	origin = virus	0.312905	90.6	83.6	DNA POLYMERASE III SUBUNIT EPSILON	1	1	DNA-directed DNA polymerase activity	0.962963	54	59	Unknown
COG004141	VtoE	905079	Guillardia theta CCMP2712	2732007	Nucleocytoviricota	origin = virus	0.803473	97	88.5	No annotation	0	0	no annotation	0	0	43	Nucleus
COG007387	VtoE	905079	Guillardia theta CCMP2712	2732007	Nucleocytoviricota	origin = virus	1.86488	83	root	No annotation	0	0	no annotation	0	0	8	Plastid
COG000113	VtoE	905079	Guillardia theta CCMP2712	2732523	Megaviricetes	origin = eukaryotic, cousin unclear	0.0222391	86	80.2	UBIQUITIN	0.9609	1279	ubiquitin	0.414104	1333	1402	Nucleus
COG000231	VtoE	905079	Guillardia theta CCMP2712	2732523	Megaviricetes	origin = unkn, cousin unclear	1.3266	80.4	83.2	GALACTOSIDE 2-L-FUCOSYLTRANSFERASE	0.9983	577	N-acetyllactosaminide 3-alpha-galactosyltransferase activity	0.931767	894	921	Extracellular
COG000387	VtoE	905079	Guillardia theta CCMP2712	2732523	Megaviricetes	origin = prokaryotic, cousin unclear	1.22873	87.8	88.9	DNA-DIRECTED RNA POLYMERASES I, II, AND III SUBUNIT RPABC1	0.9977	426	DNA-dependent RNA polymerase catalyzes the transcription of DNA into RNA using the four ribonucleoside triphosphates as substrates	0.3312	625	639	Unknown
COG001913	VtoE	905079	Guillardia theta CCMP2712	2732523	Megaviricetes	origin = virus	1.00757	91.2	84.5	No annotation	0	0	no annotation	0	0	174	Cytoplasm
COG000021	VtoE	905079	Guillardia theta CCMP2712	2732555	Pimascovirales	origin = eukaryotic	1.13273	95.2	84.9	CYSTEINE PROTEASE FAMILY C1-RELATED	0.9951	3849	Belongs to the peptidase C1 family	0.410457	4093	4142	Unknown
COG000004	VtoE	905079	Guillardia theta CCMP2712	Weakly supported	Weakly supported	origin = eukaryotic, long branching recipient	0.798	98.7	83.8	PTHR27007	0.0624	12203	Belongs to the protein kinase superfamily	0.172215	12316	12367	Cytoplasm
COG000045	VtoE	905079	Guillardia theta CCMP2712	Weakly supported	Weakly supported	origin = unkn, long branching recipient	1.01781	96.7	93.1	DNA POLYMERASE CATALYTIC SUBUNIT	0.9057	2090	3'-5' exonuclease activity	0.66927	2561	2589	Cytoplasm
COG000087	VtoE	905079	Guillardia theta CCMP2712	Weakly supported	Weakly supported	origin = virus, long branching recipient	1.64042	90.7	82	ATP BINDING PROTEIN-RELATED	0.9993	1453	D5 N terminal like	0.970588	1530	1632	Unknown
COG000718	VtoE	905079	Guillardia theta CCMP2712	Weakly supported	Weakly supported	origin = virus, long branching recipient	2.45645	90.6	92.7	TATA-BOX BINDING PROTEIN	1	3	Transcription factor TFIID (or TATA-binding protein, TBP)	1	370	421	Nucleus
COG003009	VtoE	905079	Guillardia theta CCMP2712	Weakly supported	Weakly supported	origin = eukaryotic, long branching donor	0.4668	91.3	89.8	CORE-2/I-BRANCHING BETA-1,6-N-ACETYLGLUCOSAMINYLTRANSFERASE FAMILY PROTEIN-RELATED	1	81	Core-2/I-Branching enzyme	0.876543	81	92	Cytoplasm
COG003723	VtoE	905079	Guillardia theta CCMP2712	Weakly supported	Weakly supported	origin = prokaryotic, long branching recipient	2.92647	97	89.9	INOSITOL PHOSPHOCERAMIDE MANNOSYLTRANSFERASE 1	0.6667	3	Glycosyl transferases group 1	0.37037	54	57	Nucleus
COG004638	VtoE	905079	Guillardia theta CCMP2712	Weakly supported	Weakly supported	origin = virus, long branching recipient	2.57018	root	root	No annotation	0	0	no annotation	0	0	32	Unknown
COG007100	VtoE	905079	Guillardia theta CCMP2712	Weakly supported	Weakly supported	origin = eukaryotic, long branching recipient	2.55701	80.7	97	CALCIUM BINDING PROTEIN	1	3	EF-hand domain pair	0.875	8	9	Unknown
COG001435	VtoE	1291522	Helicosporidium sp. ATCC 50920	Weakly supported	Weakly supported	origin = unkn, long branching recipient	1.38169	86.3	89	DNA-BINDING PROTEIN HU	0.9726	73	Histone-like DNA-binding protein which is capable of wrapping DNA to stabilize it, and thus to prevent its denaturation under extreme environmental conditions	0.651786	224	229	Mitochondrion
COG000892	VtoE	6412	Helobdella robusta	10239	Viruses	origin = virus	2.62556	84.5	82	RING FINGER DOMAIN-CONTAINING	0.3211	109	RING-H2 finger protein	0.354839	93	358	Extracellular
COG004171	VtoE	6412	Helobdella robusta	10239	Viruses	origin = virus	1.82011	93	root	M7GPPPN-MRNA HYDROLASE	0.5128	39	Dcp2, box A domain	0.342857	35	42	Unknown
COG007539	VtoE	6412	Helobdella robusta	10239	Viruses	origin = virus	2.17138	82.6	root	E3 UBIQUITIN-PROTEIN LIGASE TOPORS	1	5	ligase activity	0.666667	6	8	Nucleus
COG001064	VtoE	6412	Helobdella robusta	176652	Invertebrate iridescent virus 6	origin = eukaryotic, cousin unclear	1.19415	84.5	85.8	THYMIDYLATE KINASE	0.9964	277	Thymidylate kinase	0.366337	303	304	Unknown
COG000164	VtoE	6412	Helobdella robusta	Weakly supported	Weakly supported	origin = virus, long branching recipient	1.72589	95.3	84.8	MRNA GUANINE-7- METHYLTRANSFERASE	0.9712	1008	mRNA (guanine-N7-)-methyltransferase activity	0.755814	1032	1114	Unknown
COG004655	VtoE	6412	Helobdella robusta	Weakly supported	Weakly supported	origin = virus, long branching recipient	2.07326	83.3	root	RING ZINC FINGER PROTEIN-RELATED	0.7083	24	Zinc finger, C3HC4 type (RING finger)	0.421053	19	31	Unknown
COG005876	VtoE	670386	Heterostelium album PN500	2732523	Megaviricetes	origin = virus	1.40815	81.5	root	No annotation	0	0	no annotation	0	0	16	Unknown
COG005876	VtoE	670386	Heterostelium album PN500	2732523	Megaviricetes	origin = virus	1.89167	81.5	root	No annotation	0	0	no annotation	0	0	16	Unknown
COG005870	VtoE	670386	Heterostelium album PN500	Weakly supported	Weakly supported	origin = virus, long branching recipient	3.09958	98.8	root	No annotation	0	0	no annotation	0	0	16	Extracellular
COG007498	VtoE	6102	Hexacorallia	455363	unclassified Phycodnaviridae	origin = virus	1.15655	84	root	No annotation	0	0	peptidyl-tyrosine sulfation	1	5	8	Nucleus
COG002895	VtoE	6102	Hexacorallia	Weakly supported	Weakly supported	origin = virus, long branching donor	0.942429	95.1	root	GLYCOGENIN SUBFAMILY MEMBER	1	98	transferase activity, transferring glycosyl groups	0.836735	98	100	Cytoplasm
COG000387	VtoE	5739	Hexamitidae	455363	unclassified Phycodnaviridae	origin = prokaryotic	0.32547	82.8	87.8	DNA-DIRECTED RNA POLYMERASES I, II, AND III SUBUNIT RPABC1	0.9977	426	DNA-dependent RNA polymerase catalyzes the transcription of DNA into RNA using the four ribonucleoside triphosphates as substrates	0.3312	625	639	Unknown
COG000024	VtoE	5739	Hexamitidae	2732007	Nucleocytoviricota	origin = unkn, cousin unclear	0.603776	89.6	93	DNA-DIRECTED RNA POLYMERASE I SUBUNIT 2	0.9997	3308	DNA-dependent RNA polymerase catalyzes the transcription of DNA into RNA using the four ribonucleoside triphosphates as substrates	0.58331	3511	3673	Cytoplasm
COG000371	VtoE	5739	Hexamitidae	2732007	Nucleocytoviricota	origin = unkn	0.271917	82.8	84.4	AP ENDONUCLEASE	0.9801	402	Endonuclease/Exonuclease/phosphatase family	0.267692	650	661	Cytoplasm
COG000030	VtoE	5739	Hexamitidae	2732523	Megaviricetes	origin = eukaryotic	0.200772	85.7	91.7	UBIQUITIN-CONJUGATING ENZYME E2	0.9944	3206	protein modification by small protein conjugation	0.406107	3275	3304	Nucleus
COG000165	VtoE	5739	Hexamitidae	Weakly supported	Weakly supported	origin = virus, long branching donor	0.342869	89.5	90.4	TRANSCRIPTION FACTOR S-II ZINC FINGER DOMAIN-CONTAINING PROTEIN	1	934	Transcription factor S-II (TFIIS)	0.307116	1068	1112	Unknown
COG003184	VtoE	33392	Holometabola	Weakly supported	Weakly supported	origin = virus, long branching recipient	0.835726	86	89.5	DNA2/NAM7 HELICASE FAMILY	0.907	43	omega peptidase activity	1	43	82	Nucleus
COG001765	VtoE	9606	Homo sapiens	45617	Human endogenous retrovirus K	origin = virus	2.0351e-06	81.7	94.8	ENDOGENOUS RETROVIRUS GROUP K MEMBER 113 ENV POLYPROTEIN-RELATED	0.9943	175	Retroviral envelope protein	0.988372	172	186	Cell_membrane
COG001765	VtoE	9606	Homo sapiens	45617	Human endogenous retrovirus K	origin = virus	0.0178092	92.6	96.3	ENDOGENOUS RETROVIRUS GROUP K MEMBER 113 ENV POLYPROTEIN-RELATED	0.9943	175	Retroviral envelope protein	0.988372	172	186	Cell_membrane
COG001765	VtoE	9606	Homo sapiens	45617	Human endogenous retrovirus K	origin = virus	2.363e-06	85.7	90.3	ENDOGENOUS RETROVIRUS GROUP K MEMBER 113 ENV POLYPROTEIN-RELATED	0.9943	175	Retroviral envelope protein	0.988372	172	186	Cell_membrane
COG002368	VtoE	9606	Homo sapiens	45617	Human endogenous retrovirus K	origin = eukaryotic	0.130867	100	87	PTHR40389	0.9412	136	gag gene protein p24 (core nucleocapsid protein)	0.576	125	145	Nucleus
COG002368	VtoE	9606	Homo sapiens	45617	Human endogenous retrovirus K	origin = eukaryotic	0.00788232	84.3	82.5	PTHR40389	0.9412	136	gag gene protein p24 (core nucleocapsid protein)	0.576	125	145	Nucleus
COG002368	VtoE	9606	Homo sapiens	45617	Human endogenous retrovirus K	origin = eukaryotic	0.00195884	84.3	82.5	PTHR40389	0.9412	136	gag gene protein p24 (core nucleocapsid protein)	0.576	125	145	Unknown
COG002368	VtoE	9606	Homo sapiens	45617	Human endogenous retrovirus K	origin = eukaryotic	2.9499e-06	84.3	82.5	PTHR40389	0.9412	136	gag gene protein p24 (core nucleocapsid protein)	0.576	125	145	Nucleus
COG002983	VtoE	9606	Homo sapiens	45617	Human endogenous retrovirus K	origin = unkn	0.0152177	100	91.2	GAG RETROVIRAL POLYPROTEIN	1	90	Protease-like	0.354839	93	94	Cytoplasm
COG002983	VtoE	9606	Homo sapiens	45617	Human endogenous retrovirus K	origin = unkn	0.0152792	100	91.2	GAG RETROVIRAL POLYPROTEIN	1	90	Protease-like	0.354839	93	94	Cytoplasm
COG001765	VtoE	9606	Homo sapiens	Weakly supported	Weakly supported	origin = virus, long branching recipient	0.51421	root	root	ENDOGENOUS RETROVIRUS GROUP K MEMBER 113 ENV POLYPROTEIN-RELATED	0.9943	175	Retroviral envelope protein	0.988372	172	186	Cell_membrane
COG001765	VtoE	9606	Homo sapiens	Weakly supported	Weakly supported	origin = virus, long branching recipient	1.24794	96.5	root	ENDOGENOUS RETROVIRUS GROUP K MEMBER 113 ENV POLYPROTEIN-RELATED	0.9943	175	Retroviral envelope protein	0.988372	172	186	Cytoplasm
COG000358	VtoE	2315210	Hondaea fermentalgiana	10239	Viruses	origin = unkn, cousin unclear	1.63856	86.1	89.4	DNA POLYMERASE III SUBUNIT EPSILON	0.9941	170	Exonuclease	0.488525	610	678	Nucleus
COG001528	VtoE	2315210	Hondaea fermentalgiana	12429	unclassified viruses	origin = prokaryotic, cousin unclear	1.49106	83.4	81.9	TRYPTOPHANYL-TRNA SYNTHETASE	1	1	kinase activity	0.845	200	214	Cytoplasm
COG000417	VtoE	2315210	Hondaea fermentalgiana	2732007	Nucleocytoviricota	origin = eukaryotic	0.672513	99.8	82.7	FRUCTOSE-1,6-BISPHOSPHATASE-RELATED	0.9979	466	Belongs to the FBPase class 1 family	0.504039	619	621	Peroxisome
COG000860	VtoE	2315210	Hondaea fermentalgiana	2732007	Nucleocytoviricota	origin = eukaryotic	0.361758	92.6	91.9	EUKARYOTIC TRANSLATION INITIATION FACTOR SUI1	0.9944	355	Translation initiation factor SUI1	0.269231	364	365	Cytoplasm
COG003244	VtoE	2315210	Hondaea fermentalgiana	2732007	Nucleocytoviricota	origin = eukaryotic	0.73578	90.7	98.8	FATTY ACID DESATURASE 2	1	77	unsaturated fatty acid biosynthetic process	0.818182	77	79	Endoplasmic_reticulum
COG003574	VtoE	2315210	Hondaea fermentalgiana	2732007	Nucleocytoviricota	origin = virus	2.0182	96.5	root	SPHINGOSINE-1-PHOSPHATE PHOSPHOHYDROLASE	0.6735	49	Acid phosphatase homologues	0.529412	17	63	Unknown
COG003044	VtoE	2315210	Hondaea fermentalgiana	2732523	Megaviricetes	origin = eukaryotic	1.17988	97.5	83.9	ISOCITRATE DEHYDROGENASE [NADP]	1	1	no annotation	0	0	90	Extracellular
COG004735	VtoE	2315210	Hondaea fermentalgiana	2732523	Megaviricetes	origin = virus	2.6741	99.6	root	No annotation	0	0	no annotation	0	0	30	Unknown
COG000048	VtoE	2315210	Hondaea fermentalgiana	Weakly supported	Weakly supported	origin = unkn, long branching recipient	0.800466	95.3	88.8	RIBONUCLEOSIDE-DIPHOSPHATE REDUCTASE LARGE CHAIN	0.9955	2244	Provides the precursors necessary for DNA synthesis	0.506765	2439	2481	Mitochondrion
COG000491	VtoE	2315210	Hondaea fermentalgiana	Weakly supported	Weakly supported	origin = eukaryotic, long branching recipient	1.96132	88.6	88.1	WASP INTERACTING PROTEIN-RELATED	0.3333	3	ATP-dependent DNA helicase activity	0.998095	525	559	Cytoplasm
COG003138	VtoE	2315210	Hondaea fermentalgiana	Weakly supported	Weakly supported	origin = eukaryotic, long branching recipient	4.31847	86.1	99.2	FATTY ACID ACYL TRANSFERASE-RELATED	1	85	Very-long-chain 3-oxoacyl-CoA synthase	0.411765	85	85	Endoplasmic_reticulum
COG003638	VtoE	2315210	Hondaea fermentalgiana	Weakly supported	Weakly supported	origin = prokaryotic, long branching recipient	1.13225	86.6	97.3	No annotation	0	0	Belongs to the class-III pyridoxal-phosphate-dependent aminotransferase family	1	7	60	Endoplasmic_reticulum
COG000005	VtoE	31277	Hymenostomatida	2732007	Nucleocytoviricota	origin = eukaryotic	0.473843	95.2	87.7	DRAB5-RELATED	0.2327	10584	Rab subfamily of small GTPases	0.149102	10798	10903	Golgi_apparatus
COG000167	VtoE	42384	Hyphochytrium catenoides	10239	Viruses	origin = prokaryotic	1.20499	96.5	92.4	DNA MISMATCH REPAIR PROTEIN MUTS FAMILY MEMBER	1	951	Belongs to the DNA mismatch repair MutS family	0.832188	1019	1100	Cytoplasm
COG000171	VtoE	42384	Hyphochytrium catenoides	10239	Viruses	origin = virus, cousin unclear	0.565678	89.1	93.2	ANNEXIN	0.8244	968	lipid catabolic process	0.714149	1046	1084	Cytoplasm
COG000639	VtoE	42384	Hyphochytrium catenoides	10239	Viruses	origin = unkn, cousin unclear	0.8779	84	80.7	ZINC FINGER CCHC DOMAIN CONTAINING PROTEIN	0.7778	18	zinc finger	0.854881	379	461	Unknown
COG001414	VtoE	42384	Hyphochytrium catenoides	10239	Viruses	origin = unkn	0.294641	81.8	94.4	No annotation	0	0	Domain of unknown function (DUF4326)	0.615385	221	233	Mitochondrion
COG003095	VtoE	42384	Hyphochytrium catenoides	10239	Viruses	origin = eukaryotic	1.48321	84.5	97.9	UNCHARACTERIZED	1	87	FtsJ-like methyltransferase	0.344828	87	87	Mitochondrion
COG003470	VtoE	42384	Hyphochytrium catenoides	10239	Viruses	origin = virus	2.71118	99.8	root	ATP BINDING PROTEIN-RELATED	0.5	2	D5 N terminal like	1	1	67	Nucleus
COG000087	VtoE	42384	Hyphochytrium catenoides	10497	African swine fever virus	origin = virus	1.19061	86.2	91.6	ATP BINDING PROTEIN-RELATED	0.9993	1453	D5 N terminal like	0.970588	1530	1632	Cytoplasm
COG005790	VtoE	42384	Hyphochytrium catenoides	10497	African swine fever virus	origin = virus	1.89398	90.5	root	No annotation	0	0	no annotation	0	0	16	Cytoplasm
COG000040	VtoE	42384	Hyphochytrium catenoides	12429	unclassified viruses	origin = prokaryotic	1.2282	87.3	93.3	TWO-COMPONENT HISTIDINE KINASE	0.4898	1374	PhoQ Sensor	0.307939	2809	2838	Cytoplasm
COG000459	VtoE	42384	Hyphochytrium catenoides	137992	Asfarviridae	origin = unkn	0.608442	95.3	91.3	CYSTEINE DESULFURYLASE FAMILY MEMBER	0.9835	425	Master enzyme that delivers sulfur to a number of partners involved in Fe-S cluster assembly, tRNA modification or cofactor biosynthesis	0.276339	579	582	Cytoplasm
COG000510	VtoE	42384	Hyphochytrium catenoides	137992	Asfarviridae	origin = eukaryotic	1.24669	96.1	89.9	UBIQUITIN-CONJUGATING ENZYME E2	0.9981	527	Belongs to the ubiquitin-conjugating enzyme family	0.422222	540	543	Cytoplasm
COG003176	VtoE	42384	Hyphochytrium catenoides	137992	Asfarviridae	origin = virus	1.09731	99.6	99.4	DNA POLYMERASE CATALYTIC SUBUNIT	1	57	DNA polymerase	0.392405	79	82	Cytoplasm
COG004050	VtoE	42384	Hyphochytrium catenoides	137992	Asfarviridae	origin = virus	1.123	99.4	97.8	MRNA GUANINE-7- METHYLTRANSFERASE	0.8158	38	mRNA capping enzyme	0.977273	44	45	Cytoplasm
COG004420	VtoE	42384	Hyphochytrium catenoides	137992	Asfarviridae	origin = virus	1.19219	99.2	98.1	No annotation	0	0	no annotation	0	0	37	Nucleus
COG004526	VtoE	42384	Hyphochytrium catenoides	137992	Asfarviridae	origin = virus	1.58182	91.7	95.1	No annotation	0	0	Ulp1 protease family, C-terminal catalytic domain	1	32	34	Unknown
COG004606	VtoE	42384	Hyphochytrium catenoides	137992	Asfarviridae	origin = virus	0.545256	86.1	90.3	No annotation	0	0	no annotation	0	0	32	Unknown
COG004910	VtoE	42384	Hyphochytrium catenoides	137992	Asfarviridae	origin = virus	2.13167	80.3	87.1	No annotation	0	0	no annotation	0	0	27	Nucleus
COG005559	VtoE	42384	Hyphochytrium catenoides	137992	Asfarviridae	origin = virus	1.15148	91.3	96.9	DNA-DIRECTED RNA POLYMERASES I, II, AND III SUBUNIT RPABC1	1	1	DNA-dependent RNA polymerase catalyzes the transcription of DNA into RNA using the four ribonucleoside triphosphates as substrates	1	11	18	Cytoplasm
COG005616	VtoE	42384	Hyphochytrium catenoides	137992	Asfarviridae	origin = virus	1.48997	81.5	root	No annotation	0	0	no annotation	0	0	18	Unknown
COG003361	VtoE	42384	Hyphochytrium catenoides	1513234	Cafeteriavirus	origin = unkn, cousin unclear	1.68579	91.1	89	TENASCIN	0.5	4	cellulose binding	0.6	50	72	Unknown
COG000038	VtoE	42384	Hyphochytrium catenoides	2732007	Nucleocytoviricota	origin = unkn	0.761304	96.7	99.9	DNA-DIRECTED RNA POLYMERASE	0.9996	2582	DNA-dependent RNA polymerase catalyzes the transcription of DNA into RNA using the four ribonucleoside triphosphates as substrates	0.704619	2793	2889	Cytoplasm
COG000043	VtoE	42384	Hyphochytrium catenoides	2732007	Nucleocytoviricota	origin = unkn	0.725658	87.7	93	THYMIDYLATE SYNTHASE 1	0.701	2381	Thymidylate synthase	0.35328	2607	2647	Cytoplasm
COG000055	VtoE	42384	Hyphochytrium catenoides	2732007	Nucleocytoviricota	origin = eukaryotic	0.522751	99.8	97.4	DNA TOPOISOMERASE/GYRASE	0.9857	2162	Control of topological states of DNA by transient breakage and subsequent rejoining of DNA strands	0.471552	2197	2268	Nucleus
COG000355	VtoE	42384	Hyphochytrium catenoides	2732007	Nucleocytoviricota	origin = eukaryotic	0.497458	99.8	96	UDP-GLUCURONIC ACID DECARBOXYLASE-RELATED	0.891	422	UDP-glucuronate decarboxylase activity	0.121302	676	686	Cytoplasm
COG000379	VtoE	42384	Hyphochytrium catenoides	2732007	Nucleocytoviricota	origin = unkn	0.579353	87.5	89.1	EBNA2 BINDING PROTEIN P100	1	233	Staphylococcal nuclease homologue	0.806641	512	650	Cytoplasm
COG000770	VtoE	42384	Hyphochytrium catenoides	2732007	Nucleocytoviricota	origin = eukaryotic, cousin unclear	0.678618	97.8	95	GLCNAC TRANSFERASE-RELATED	1	318	Glycosyltransferase (GlcNAc)	0.845758	389	396	Unknown
COG005277	VtoE	42384	Hyphochytrium catenoides	2732007	Nucleocytoviricota	origin = virus	1.5678	90.1	root	TRANSCRIPTION FACTOR S-II ZINC FINGER DOMAIN-CONTAINING PROTEIN	1	2	Transcription elongation factor A	0.5	14	21	Cytoplasm
COG005437	VtoE	42384	Hyphochytrium catenoides	2732007	Nucleocytoviricota	origin = virus	1.3623	87.1	89.6	No annotation	0	0	N-methyltransferase activity	1	1	19	Cytoplasm
COG000199	VtoE	42384	Hyphochytrium catenoides	2732523	Megaviricetes	origin = virus, cousin unclear	1.95736	83.6	87.7	DNA-DIRECTED RNA POLYMERASE I SUBUNIT 2	0.3333	3	HNH endonuclease	0.732632	950	1001	Unknown
COG004215	VtoE	42384	Hyphochytrium catenoides	2732523	Megaviricetes	origin = eukaryotic, cousin unclear	0.753063	83.2	85.5	PROTEIN C6ORF130	0.9	10	Domain of unknown function (DUF1768)	0.75	8	41	Unknown
COG000024	VtoE	42384	Hyphochytrium catenoides	Weakly supported	Weakly supported	origin = unkn, long branching donor	0.650418	94.5	100	DNA-DIRECTED RNA POLYMERASE I SUBUNIT 2	0.9997	3308	DNA-dependent RNA polymerase catalyzes the transcription of DNA into RNA using the four ribonucleoside triphosphates as substrates	0.58331	3511	3673	Cytoplasm
COG000048	VtoE	42384	Hyphochytrium catenoides	Weakly supported	Weakly supported	origin = eukaryotic, long branching recipient	0.575308	89.4	96	RIBONUCLEOSIDE-DIPHOSPHATE REDUCTASE LARGE CHAIN	0.9955	2244	Provides the precursors necessary for DNA synthesis	0.506765	2439	2481	Cytoplasm
COG000068	VtoE	42384	Hyphochytrium catenoides	Weakly supported	Weakly supported	origin = unkn, long branching recipient	1.3605	81.3	93.4	RIBONUCLEOSIDE-DIPHOSPHATE REDUCTASE SMALL CHAIN	0.9972	1762	Ribonucleotide reductase, small chain	0.392931	1924	1961	Cytoplasm
COG000157	VtoE	42384	Hyphochytrium catenoides	Weakly supported	Weakly supported	origin = virus, long branching donor	0.811983	85.7	93.3	ROLLING PEBBLES, ISOFORM B	1	1	metallopeptidase activity	1	1046	1130	Unknown
COG001499	VtoE	42384	Hyphochytrium catenoides	Weakly supported	Weakly supported	origin = virus, long branching recipient	0.974898	100	99.9	DNA ANNEALING HELICASE AND ENDONUCLEASE ZRANB3 FAMILY MEMBER	0.7625	160	N-methyltransferase activity	1	213	218	Nucleus
COG001913	VtoE	42384	Hyphochytrium catenoides	Weakly supported	Weakly supported	origin = virus, long branching recipient	3.12701	97.4	91.7	No annotation	0	0	no annotation	0	0	174	Unknown
COG001913	VtoE	42384	Hyphochytrium catenoides	Weakly supported	Weakly supported	origin = virus, long branching recipient	1.76367	82	91.2	No annotation	0	0	no annotation	0	0	174	Unknown
COG002643	VtoE	42384	Hyphochytrium catenoides	Weakly supported	Weakly supported	origin = virus, long branching recipient	0.662714	98.2	96.5	No annotation	0	0	Major capsid protein N-terminus	1	109	120	Cytoplasm
COG003338	VtoE	42384	Hyphochytrium catenoides	Weakly supported	Weakly supported	origin = virus, long branching recipient	0.89526	91.3	88.7	PTHR34403	1	1	no annotation	0	0	74	Cytoplasm
COG005333	VtoE	1819745	Intoshia linei	10239	Viruses	origin = unkn	0.791632	88	88.8	No annotation	0	0	RNA helicase activity	0.909091	11	20	Unknown
COG000115	VtoE	1819745	Intoshia linei	455363	unclassified Phycodnaviridae	origin = eukaryotic	0.672461	95.4	84	ASPARAGINE SYNTHETASE	0.9916	1072	Aluminium induced protein	0.208791	1365	1386	Unknown
COG000394	VtoE	1819745	Intoshia linei	1977639	Klosneuvirus	origin = eukaryotic	1.17591	96.3	99.9	UBIQUITIN-ACTIVATING ENZYME E1	0.9983	605	ubiquitin activating enzyme activity	0.296651	627	634	Unknown
COG000043	VtoE	1819745	Intoshia linei	2732007	Nucleocytoviricota	origin = unkn	0.790827	88.4	91.2	THYMIDYLATE SYNTHASE 1	0.701	2381	Thymidylate synthase	0.35328	2607	2647	Mitochondrion
COG000753	VtoE	1819745	Intoshia linei	2732007	Nucleocytoviricota	origin = unkn, cousin unclear	1.22274	93.8	86.5	ENDOTHELIAL DIFFERENTIATION-RELATED FACTOR 1 MULTIPROTEIN BRIDGING FACTOR 1	1	361	Helix-turn-helix XRE-family like proteins	0.20354	339	401	Unknown
COG000818	VtoE	1819745	Intoshia linei	2732523	Megaviricetes	origin = eukaryotic	0.323846	93.7	95.6	EUKARYOTIC TRANSLATION INITIATION FACTOR 2-ALPHA KINASE EIF2-ALPHA KINASE -RELATED	0.9694	359	Protein tyrosine kinase	0.206989	372	378	Unknown
COG001101	VtoE	1819745	Intoshia linei	2732523	Megaviricetes	origin = prokaryotic	1.15772	89.4	89	OROTATE PHOSPHORIBOSYLTRANSFERASE	0.8513	195	Orotidine 5'-phosphate decarboxylase / HUMPS family	0.258741	286	294	Cytoplasm
COG000089	VtoE	1819745	Intoshia linei	Weakly supported	Weakly supported	origin = unkn, long branching recipient	1.42512	96.7	93.4	ATP-DEPENDENT RNA AND DNA HELICASE	0.965	1228	DNA-dependent ATPase and 3'-5' DNA helicase that may be involved in repair of stalled replication forks	0.292776	1578	1607	Nucleus
COG000092	VtoE	1819745	Intoshia linei	Weakly supported	Weakly supported	origin = virus, long branching recipient	1.76378	83.8	100	No annotation	0	0	Mononegavirales mRNA-capping region V	1	1569	1597	Unknown
COG000092	VtoE	1819745	Intoshia linei	Weakly supported	Weakly supported	origin = virus, long branching recipient	1.73061	92.7	100	No annotation	0	0	Mononegavirales mRNA-capping region V	1	1569	1597	Unknown
COG000092	VtoE	1819745	Intoshia linei	Weakly supported	Weakly supported	origin = virus, long branching recipient	0.337155	100	100	No annotation	0	0	Mononegavirales mRNA-capping region V	1	1569	1597	Mitochondrion
COG000162	VtoE	1819745	Intoshia linei	Weakly supported	Weakly supported	origin = eukaryotic, long branching recipient	1.54788	82.4	92.8	UBIQUITIN CARBOXYL-TERMINAL HYDROLASE	1	1081	Belongs to the peptidase C19 family	0.372835	1097	1116	Cytoplasm
COG000692	VtoE	1819745	Intoshia linei	Weakly supported	Weakly supported	origin = eukaryotic, long branching recipient	2.61008	88.4	93.3	TRANSLATION INITIATION FACTOR IF-2-RELATED	1	270	Function in general translation initiation by promoting the binding of the formylmethionine-tRNA to ribosomes	0.345708	431	432	Nucleus
COG001009	VtoE	1819745	Intoshia linei	Weakly supported	Weakly supported	origin = eukaryotic, long branching recipient	0.92844	82.7	93.1	CASEIN KINASE-RELATED	0.9937	316	protein serine/threonine kinase activity	0.537267	322	323	Cytoplasm
COG001163	VtoE	1819745	Intoshia linei	Weakly supported	Weakly supported	origin = virus, long branching recipient	2.13263	94.7	100	No annotation	0	0	RNA processing	1	273	284	Unknown
COG001163	VtoE	1819745	Intoshia linei	Weakly supported	Weakly supported	origin = virus, long branching recipient	2.15333	86.3	100	No annotation	0	0	RNA processing	1	273	284	Unknown
COG003274	VtoE	1819745	Intoshia linei	Weakly supported	Weakly supported	origin = virus, sister unclear	2.94254	90.5	86.9	DNAJ HOMOLOG SUBFAMILY C MEMBER	0.5294	68	ATP binding to DnaK triggers the release of the substrate protein, thus completing the reaction cycle	0.188406	69	77	Unknown
COG005159	VtoE	1819745	Intoshia linei	Weakly supported	Weakly supported	origin = virus, long branching recipient	3.41585	86.6	root	No annotation	0	0	no annotation	0	0	23	Cytoplasm
COG000162	VtoE	431838	Intramacronucleata	2732007	Nucleocytoviricota	origin = eukaryotic, cousin unclear	0.345533	82.4	92.8	UBIQUITIN CARBOXYL-TERMINAL HYDROLASE	1	1081	Belongs to the peptidase C19 family	0.372835	1097	1116	Cytoplasm
COG004728	VtoE	6945	Ixodes scapularis	1404345	Acheta domestica mini ambidensovirus	origin = eukaryotic	0.812924	85.6	84.8	No annotation	0	0	Parvovirus non-structural protein NS1	1	29	30	Cytoplasm
COG005165	VtoE	6945	Ixodes scapularis	1844920	Blacklegged tick phlebovirus 3	origin = virus, cousin unclear	0.533519	99.7	80.6	DISHEVELED-ASSOCIATED ACTIVATOR OF MORPHOGENESIS 1	1	1	Tenuivirus/Phlebovirus nucleocapsid protein	1	15	23	Unknown
COG000721	VtoE	6945	Ixodes scapularis	2034335	Norway mononegavirus 1	origin = eukaryotic, cousin unclear	0.813361	92.7	83	No annotation	0	0	Rhabdovirus nucleocapsid protein	0.971223	417	419	Unknown
COG007056	VtoE	6945	Ixodes scapularis	2559587	Riboviria	origin = virus	1.73081	94.2	root	No annotation	0	0	no annotation	0	0	10	Unknown
COG000054	VtoE	6945	Ixodes scapularis	Weakly supported	Weakly supported	origin = eukaryotic, long branching recipient	2.69679	97.2	90.2	RECEPTOR-TYPE TYROSINE-PROTEIN PHOSPHATASE	0.7706	2210	protein tyrosine phosphatase activity	0.419454	2272	2296	Cytoplasm
COG000721	VtoE	6945	Ixodes scapularis	Weakly supported	Weakly supported	origin = virus, long branching recipient	1.15891	83	root	No annotation	0	0	Rhabdovirus nucleocapsid protein	0.971223	417	419	Unknown
COG000231	VtoE	5653	Kinetoplastea	10239	Viruses	origin = virus, cousin unclear	1.15024	83.7	83.2	GALACTOSIDE 2-L-FUCOSYLTRANSFERASE	0.9983	577	N-acetyllactosaminide 3-alpha-galactosyltransferase activity	0.931767	894	921	Mitochondrion
COG002758	VtoE	5653	Kinetoplastea	2732007	Nucleocytoviricota	origin = virus	0.381739	root	root	INITIATION-SPECIFIC ALPHA-1,6-MANNOSYLTRANSFERASE	0.5	2	Glycosyltransferase sugar-binding region containing DXD motif	0.5	2	110	Mitochondrion
COG000357	VtoE	5653	Kinetoplastea	Weakly supported	Weakly supported	origin = unkn, long branching donor	0.400854	98.7	95.8	HISTONE ACETYLTRANSFERASE-RELATED	1	517	radical SAM domain protein	0.355224	670	682	Nucleus
COG006441	VtoE	1296120	Kwoniella heveanensis BCC8398	1586712	Yellowstone lake mimivirus	origin = virus	2.6801	98.4	root	HIGH MOBILITY GROUP PROTEIN DSP1	0.9167	12	HMG-box domain	0.333333	3	12	Nucleus
COG001864	VtoE	1296120	Kwoniella heveanensis BCC8398	Weakly supported	Weakly supported	origin = prokaryotic, long branching recipient	1.7633	86.8	88.1	ATP-DEPENDENT HELICASE IRC3-RELATED	0.6136	132	helicase activity	0.514124	177	177	Unknown
COG000097	VtoE	716546	leotiomyceta	10239	Viruses	origin = eukaryotic, cousin unclear	0.951729	86.8	88	PROLYL 4-HYDROXYLASE ALPHA SUBUNIT	0.9967	1228	Prolyl 4-hydroxylase alpha subunit homologues	0.312419	1546	1564	Extracellular
COG000139	VtoE	7574	Lingula anatina	455363	unclassified Phycodnaviridae	origin = eukaryotic, cousin unclear	0.519056	83.4	89.1	DTDP-D-GLUCOSE 4,6-DEHYDRATASE-RELATED	0.7699	969	dTDP-glucose 4,6-dehydratase activity	0.372171	1193	1220	Cytoplasm
COG000410	VtoE	7574	Lingula anatina	2732007	Nucleocytoviricota	origin = eukaryotic	1.18877	92.1	92.3	TNF RECEPTOR ASSOCIATED FACTOR	0.995	602	activation of NF-kappaB-inducing kinase activity	0.19187	615	625	Unknown
COG000014	VtoE	7574	Lingula anatina	Weakly supported	Weakly supported	origin = eukaryotic, long branching donor	1.07895	92.2	81	DNAJ HOMOLOG SUBFAMILY C MEMBER	0.3541	3253	ATP binding to DnaK triggers the release of the substrate protein, thus completing the reaction cycle	0.315643	5747	5826	Unknown
COG004418	VtoE	8400	Lithobates catesbeianus	10492	Ranavirus	origin = unkn, cousin unclear	0.375386	94.1	93.6	ACETYL, PROPIONYL, PYRUVATE, AND GLUTACONYL CARBOXYLASE-RELATED	1	1	US22 like	1	36	37	Nucleus
COG004418	VtoE	8400	Lithobates catesbeianus	10492	Ranavirus	origin = unkn	0.0359708	97.4	93.6	ACETYL, PROPIONYL, PYRUVATE, AND GLUTACONYL CARBOXYLASE-RELATED	1	1	US22 like	1	36	37	Unknown
COG000010	VtoE	8400	Lithobates catesbeianus	11632	Retroviridae	origin = eukaryotic	0.176284	96.2	98	SERINE/THREONINE-PROTEIN KINASE TNNI3K-RELATED	0.2795	7095	protein kinase activity	0.145963	7221	7300	Unknown
COG001991	VtoE	8400	Lithobates catesbeianus	2282206	Bufonid herpesvirus 1	origin = eukaryotic	0.535515	90.8	81.3	C-TYPE LECTIN DOMAIN-CONTAINING PROTEIN 180	0.8896	163	carbohydrate binding	0.393939	165	166	Unknown
COG000826	VtoE	299123	Lonchura striata domestica	10240	Poxviridae	origin = eukaryotic	1.46401	83.3	81.1	MRNA-CAPPING ENZYME	0.9972	363	Bifunctional mRNA-capping enzyme exhibiting RNA 5'- triphosphatase activity in the N-terminal part and mRNA guanylyltransferase activity in the C-terminal part	0.190349	373	375	Nucleus
COG000007	VtoE	299123	Lonchura striata domestica	Weakly supported	Weakly supported	origin = virus, long branching recipient	1.21995	83.6	root	ENDOGENOUS RETROVIRUS GROUP K MEMBER POL PROTEIN	0.7503	5615	ribonuclease H activity	0.620133	7987	8051	Mitochondrion
COG000007	VtoE	299123	Lonchura striata domestica	Weakly supported	Weakly supported	origin = virus, long branching recipient	0.840115	98.3	86.2	ENDOGENOUS RETROVIRUS GROUP K MEMBER POL PROTEIN	0.7503	5615	ribonuclease H activity	0.620133	7987	8051	Unknown
COG000221	VtoE	299123	Lonchura striata domestica	Weakly supported	Weakly supported	origin = eukaryotic, long branching recipient	0.281234	92.1	95.2	VIRAL ENVELOPE PROTEIN	1	795	ENV polyprotein (coat polyprotein)	0.847476	931	937	Unknown
COG001678	VtoE	299123	Lonchura striata domestica	Weakly supported	Weakly supported	origin = virus, long branching recipient	1.17533	100	root	ENDOGENOUS RETROVIRUS GROUP K MEMBER POL PROTEIN	0.7962	157	ribonuclease H activity	0.71978	182	195	Unknown
COG001678	VtoE	299123	Lonchura striata domestica	Weakly supported	Weakly supported	origin = virus, long branching recipient	0.726974	95.8	100	ENDOGENOUS RETROVIRUS GROUP K MEMBER POL PROTEIN	0.7962	157	ribonuclease H activity	0.71978	182	195	Unknown
COG000509	VtoE	225164	Lottia gigantea	10239	Viruses	origin = virus	0.133046	root	root	No annotation	0	0	ATPase activity, uncoupled	1	538	546	Unknown
COG000509	VtoE	225164	Lottia gigantea	10239	Viruses	origin = virus	0.0336154	root	root	No annotation	0	0	ATPase activity, uncoupled	1	538	546	Unknown
COG000433	VtoE	225164	Lottia gigantea	10442	Baculoviridae	origin = unkn	1.03249	91.3	81.8	INHIBITOR OF APOPTOSIS	0.9693	587	Inhibitor of Apoptosis domain	0.256711	596	604	Mitochondrion
COG003129	VtoE	225164	Lottia gigantea	Weakly supported	Weakly supported	origin = virus, long branching recipient	1.66929	99.8	root	TUMOR NECROSIS FACTOR RECEPTOR SUPERFAMILY MEMBER 1B	0.9429	70	Protein of unknown function (DUF1406)	0.582278	79	86	Extracellular
COG000209	VtoE	9544	Macaca mulatta	10239	Viruses	origin = unkn	1.18734	85.3	84.4	ALPHA-KETOGLUTARATE-DEPENDENT DIOXYGENASE ALKB HOMOLOG 3	0.6376	356	2OG-Fe(II) oxygenase superfamily	0.391032	959	973	Nucleus
COG000221	VtoE	9544	Macaca mulatta	Weakly supported	Weakly supported	origin = eukaryotic, long branching recipient	0.632318	91.2	98.6	VIRAL ENVELOPE PROTEIN	1	795	ENV polyprotein (coat polyprotein)	0.847476	931	937	Mitochondrion
COG000139	VtoE	13792	Mamiellales	10239	Viruses	origin = unkn	0.230788	94.7	97.4	DTDP-D-GLUCOSE 4,6-DEHYDRATASE-RELATED	0.7699	969	dTDP-glucose 4,6-dehydratase activity	0.372171	1193	1220	Peroxisome
COG003244	VtoE	13792	Mamiellales	2732007	Nucleocytoviricota	origin = eukaryotic	0.189076	90.7	98.8	FATTY ACID DESATURASE 2	1	77	unsaturated fatty acid biosynthetic process	0.818182	77	79	Endoplasmic_reticulum
COG000149	VtoE	13792	Mamiellales	Weakly supported	Weakly supported	origin = virus, long branching recipient	1.36388	95.8	94	EXONUCLEASE, PHAGE-TYPE/RECB, C-TERMINAL DOMAIN-CONTAINING PROTEIN	1	970	induction by virus of catabolism of host mRNA	0.993601	1094	1147	Nucleus
COG000139	VtoE	2704647	Metakinetoplastina	10239	Viruses	origin = unkn	0.267877	94.9	85.5	DTDP-D-GLUCOSE 4,6-DEHYDRATASE-RELATED	0.7699	969	dTDP-glucose 4,6-dehydratase activity	0.372171	1193	1220	Cytoplasm
COG000710	VtoE	2704647	Metakinetoplastina	455363	unclassified Phycodnaviridae	origin = eukaryotic	0.656978	88.1	81.5	EIF-1A	0.9951	406	Seems to be required for maximal rate of protein biosynthesis	0.707617	407	423	Nucleus
COG000312	VtoE	2704647	Metakinetoplastina	2732523	Megaviricetes	origin = unkn, cousin unclear	0.695628	87	93.2	GLUTAMINE SYNTHETASE	1	595	glutamine synthetase	0.484646	749	755	Cytoplasm
COG000208	VtoE	33208	Metazoa	1513234	Cafeteriavirus	origin = eukaryotic	0.254134	89.2	90.9	DIMETHYLANILINE MONOOXYGENASE	0.9342	805	N,N-dimethylaniline monooxygenase activity	0.258496	971	977	Peroxisome
COG003496	VtoE	554055	Micractinium conductrix	Weakly supported	Weakly supported	origin = virus, long branching recipient	3.12292	96.7	root	DNA-DIRECTED PRIMASE / POLYMERASE PROTEIN	0.75	4	Origin of replication binding protein	0.949153	59	66	Unknown
COG003674	VtoE	38832	Micromonas	2506605	Marseillevirus LCMAC201	origin = virus	0.666811	89.6	91.2	PTHR16469	1	44	PFAM Phosphoglycerate mutase family	0.416667	36	59	Cytoplasm
COG005164	VtoE	38832	Micromonas	Weakly supported	Weakly supported	origin = virus, sister unclear	0.686681	82.4	root	No annotation	0	0	no annotation	0	0	23	Cytoplasm
COG002338	VtoE	296587	Micromonas commoda	2732007	Nucleocytoviricota	origin = unkn	1.32025	81.9	86.2	UNCHARACTERIZED	0.6944	36	tail collar domain protein	0.40678	59	147	Cytoplasm
COG001304	VtoE	296587	Micromonas commoda	Weakly supported	Weakly supported	origin = prokaryotic, long branching recipient	2.67454	98.8	85.6	RAD25/XP-B DNA REPAIR HELICASE	0.75	20	Restriction endonuclease	0.27381	252	253	Nucleus
COG003333	VtoE	296587	Micromonas commoda	Weakly supported	Weakly supported	origin = virus, long branching recipient	1.19037	83.3	83	TRNA (CYTOSINE(38)-C(5))-METHYLTRANSFERASE	0.6471	68	C-5 cytosine-specific DNA methylase	0.959459	74	74	Nucleus
COG004927	VtoE	296587	Micromonas commoda	Weakly supported	Weakly supported	origin = virus, long branching recipient	1.58175	84.4	97.7	No annotation	0	0	no annotation	0	0	26	Unknown
COG000235	VtoE	564608	Micromonas pusilla CCMP1545	10239	Viruses	origin = virus	0.00716034	root	root	PHOTOSYSTEM II PROTEIN D1	1	844	Photosystem II (PSII) is a light-driven water plastoquinone oxidoreductase that uses light energy to abstract electrons from H(2)O, generating O(2) and a proton gradient subsequently used for ATP formation	0.519651	916	916	Lysosome/Vacuole
COG000509	VtoE	564608	Micromonas pusilla CCMP1545	10239	Viruses	origin = virus	1.01063	root	root	No annotation	0	0	ATPase activity, uncoupled	1	538	546	Nucleus
COG001340	VtoE	564608	Micromonas pusilla CCMP1545	10239	Viruses	origin = unkn	2.05722	90.2	84.3	BETA-1,3-GALACTOSYLTRANSFERASE 6	0.3333	3	negative regulation of septation initiation signaling	0.589109	202	246	Golgi_apparatus
COG000070	VtoE	564608	Micromonas pusilla CCMP1545	10501	Phycodnaviridae	origin = eukaryotic	0.255293	80.8	99.9	METALLOPROTEASE M41 FTSH	0.7123	1710	Acts as a processive, ATP-dependent zinc metallopeptidase for both cytoplasmic and membrane proteins	0.299258	1888	1949	Mitochondrion
COG004713	VtoE	564608	Micromonas pusilla CCMP1545	10662	Myoviridae	origin = virus	1.08504	98.9	83.1	No annotation	0	0	Glycosyltransferase family 25 (LPS biosynthesis protein)	0.793103	29	30	Unknown
COG003162	VtoE	564608	Micromonas pusilla CCMP1545	373997	Micromonas pusilla virus PL1	origin = virus	0.401303	100	97.8	DNA-DIRECTED PRIMASE / POLYMERASE PROTEIN	1	1	no annotation	0	0	83	Cytoplasm
COG000136	VtoE	564608	Micromonas pusilla CCMP1545	2732007	Nucleocytoviricota	origin = eukaryotic	1.59884	90.3	90.9	ZINC METALLOPROTEASE FAMILY M13 NEPRILYSIN-RELATED	0.999	1028	metalloendopeptidase activity	0.288192	1211	1238	Cytoplasm
COG003142	VtoE	564608	Micromonas pusilla CCMP1545	2732007	Nucleocytoviricota	origin = virus	0.978591	94.4	100	PROTEIN STAR	0.6667	3	transferase activity	0.25	8	85	Golgi_apparatus
COG004791	VtoE	564608	Micromonas pusilla CCMP1545	2732007	Nucleocytoviricota	origin = virus	0.94338	94.2	86.3	No annotation	0	0	no annotation	0	0	29	Unknown
COG000491	VtoE	564608	Micromonas pusilla CCMP1545	Weakly supported	Weakly supported	origin = eukaryotic, long branching recipient	1.85173	85	89.4	WASP INTERACTING PROTEIN-RELATED	0.3333	3	ATP-dependent DNA helicase activity	0.998095	525	559	Unknown
COG002771	VtoE	564608	Micromonas pusilla CCMP1545	Weakly supported	Weakly supported	origin = virus, sister unclear	2.40445	94.3	94	PROCOLLAGEN-LYSINE,2-OXOGLUTARATE 5-DIOXYGENASE/GLYCOSYLTRANSFERASE 25 FAMILY MEMBER	1	5	Procollagen-lysine 1, 2-oxoglutarate 5-dioxygenase 1a	0.3125	16	109	Golgi_apparatus
COG004201	VtoE	564608	Micromonas pusilla CCMP1545	Weakly supported	Weakly supported	origin = unkn, long branching recipient	1.58533	83	93.7	PTHR39444	1	1	methyltransferase activity	0.666667	18	42	Nucleus
COG005649	VtoE	564608	Micromonas pusilla CCMP1545	Weakly supported	Weakly supported	origin = virus, sister unclear	1.245	95.3	root	ATP BINDING PROTEIN-RELATED	1	12	Virulence-associated protein E	0.8125	16	17	Nucleus
COG000112	VtoE	1485682	Mitosporidium daphniae	1450746	Pithovirus sibericum	origin = prokaryotic, cousin unclear	1.39449	98.4	86	ALPHA/BETA HYDROLASE DOMAIN-CONTAINING PROTEIN	0.9933	1043	palmitoyl-(protein) hydrolase activity	0.145022	1386	1403	Unknown
COG004749	VtoE	1485682	Mitosporidium daphniae	2732007	Nucleocytoviricota	origin = virus	2.69251	89.6	root	UBIQUITIN CARBOXYL-TERMINAL HYDROLASE	1	24	Belongs to the peptidase C19 family	0.6	20	29	Cytoplasm
COG000738	VtoE	1485682	Mitosporidium daphniae	Weakly supported	Weakly supported	origin = eukaryotic, long branching recipient	1.48481	87.5	92	REPLICATION FACTOR C / DNA POLYMERASE III GAMMA-TAU SUBUNIT	1	389	DNA polymerase III, delta subunit	0.355164	397	408	Mitochondrion
COG003722	VtoE	1485682	Mitosporidium daphniae	Weakly supported	Weakly supported	origin = virus, sister unclear	0.916439	92.8	root	METHYLTRANSFERASE, FKBM FAMILY PROTEIN	0.9643	28	tRNA (guanine(37)-N(1))-methyltransferase activity	0.313725	51	57	Unknown
COG000466	VtoE	13616	Monodelphis domestica	Weakly supported	Weakly supported	origin = unkn, long branching recipient	1.10201	87.7	90.1	POL PROTEIN	0.7067	491	genomic stop codons	0.435897	546	576	Unknown
COG000466	VtoE	13616	Monodelphis domestica	Weakly supported	Weakly supported	origin = unkn, long branching recipient	0.812288	98.6	99.3	POL PROTEIN	0.7067	491	genomic stop codons	0.435897	546	576	Cytoplasm
COG003731	VtoE	145388	Monoraphidium neglectum	Weakly supported	Weakly supported	origin = virus, long branching recipient	1.09186	82.4	99.7	No annotation	0	0	methyltransferase activity	1	47	57	Mitochondrion
COG000299	VtoE	81824	Monosiga brevicollis	549779	Mimiviridae	origin = unkn	1.79284	89.1	93.4	TRANSCRIPTION TERMINATION FACTOR 2-RELATED	0.992	749	SNF2 family N-terminal domain	0.203922	765	775	Nucleus
COG003654	VtoE	81824	Monosiga brevicollis	1513234	Cafeteriavirus	origin = virus	1.9219	93.8	90.8	No annotation	0	0	no annotation	0	0	60	Nucleus
COG003148	VtoE	81824	Monosiga brevicollis	2732555	Pimascovirales	origin = prokaryotic	2.40553	90.9	95	HEAVYWEIGHT, ISOFORM A	0.8571	7	Domain of unknown function (DUF5011)	0.234568	81	84	Cell_membrane
COG000001	VtoE	81824	Monosiga brevicollis	Weakly supported	Weakly supported	origin = unkn, long branching donor	1.38076	96.7	86.1	SERINE/THREONINE-PROTEIN KINASE	0.2995	16718	protein serine/threonine kinase activity	0.191391	17075	17289	Unknown
COG000203	VtoE	81824	Monosiga brevicollis	Weakly supported	Weakly supported	origin = eukaryotic, long branching donor	0.72181	81.8	80.2	MICROTUBULE-ASSOCIATED PROTEINS 1A/1B LIGHT CHAIN 3-RELATED	0.999	954	Belongs to the ATG8 family	0.387565	965	987	Nucleus
COG002468	VtoE	39107	Murinae	Weakly supported	Weakly supported	origin = virus, long branching recipient	0.977158	99.5	91	SCHLAFEN	1	79	Nucleopolyhedrovirus p26 protein	0.978102	137	137	Cytoplasm
COG000221	VtoE	10090	Mus musculus	11786	Murine leukemia virus	origin = eukaryotic	2.8256e-06	90	95	VIRAL ENVELOPE PROTEIN	1	795	ENV polyprotein (coat polyprotein)	0.847476	931	937	Cell_membrane
COG000466	VtoE	10090	Mus musculus	153135	Gammaretrovirus	origin = unkn	2.2691e-06	92.6	99.2	POL PROTEIN	0.7067	491	genomic stop codons	0.435897	546	576	Unknown
COG000221	VtoE	10090	Mus musculus	Weakly supported	Weakly supported	origin = eukaryotic, long branching recipient	0.422796	99.3	87.8	VIRAL ENVELOPE PROTEIN	1	795	ENV polyprotein (coat polyprotein)	0.847476	931	937	Unknown
COG000466	VtoE	10090	Mus musculus	Weakly supported	Weakly supported	origin = unkn, long branching recipient	0.680154	100	98.7	POL PROTEIN	0.7067	491	genomic stop codons	0.435897	546	576	Unknown
COG002488	VtoE	214687	Musa acuminata subsp. malaccensis	10652	Badnavirus	origin = virus	0.309408	89.2	87.7	No annotation	0	0	no annotation	0	0	135	Cytoplasm
COG000069	VtoE	214687	Musa acuminata subsp. malaccensis	69577	Banana streak virus	origin = virus	0.0216208	81.8	96	ENZYMATIC POLYPROTEIN-RELATED	0.9934	1372	polyprotein	0.647557	1535	1954	Unknown
COG000069	VtoE	214687	Musa acuminata subsp. malaccensis	325348	unclassified Badnavirus	origin = virus, cousin unclear	0.0840096	91.2	89	ENZYMATIC POLYPROTEIN-RELATED	0.9934	1372	polyprotein	0.647557	1535	1954	Nucleus
COG000069	VtoE	214687	Musa acuminata subsp. malaccensis	325348	unclassified Badnavirus	origin = virus, cousin unclear	0.00704376	91.2	89	ENZYMATIC POLYPROTEIN-RELATED	0.9934	1372	polyprotein	0.647557	1535	1954	Unknown
COG000069	VtoE	214687	Musa acuminata subsp. malaccensis	325348	unclassified Badnavirus	origin = virus, cousin unclear	2.2662e-06	91.2	89	ENZYMATIC POLYPROTEIN-RELATED	0.9934	1372	polyprotein	0.647557	1535	1954	Nucleus
COG000069	VtoE	214687	Musa acuminata subsp. malaccensis	325348	unclassified Badnavirus	origin = virus	2.2742e-06	97.9	96.6	ENZYMATIC POLYPROTEIN-RELATED	0.9934	1372	polyprotein	0.647557	1535	1954	Unknown
COG000019	VtoE	214687	Musa acuminata subsp. malaccensis	549779	Mimiviridae	origin = eukaryotic, cousin unclear	0.653719	99.5	87.7	HEAT SHOCK PROTEIN 70KDA	0.8288	3895	Belongs to the heat shock protein 70 family	0.27064	4530	4585	Unknown
COG000024	VtoE	214687	Musa acuminata subsp. malaccensis	Weakly supported	Weakly supported	origin = unkn, long branching donor	0.500304	92.2	83.1	DNA-DIRECTED RNA POLYMERASE I SUBUNIT 2	0.9997	3308	DNA-dependent RNA polymerase catalyzes the transcription of DNA into RNA using the four ribonucleoside triphosphates as substrates	0.58331	3511	3673	Unknown
COG000038	VtoE	214687	Musa acuminata subsp. malaccensis	Weakly supported	Weakly supported	origin = eukaryotic, long branching recipient	2.29477	87	83	DNA-DIRECTED RNA POLYMERASE	0.9996	2582	DNA-dependent RNA polymerase catalyzes the transcription of DNA into RNA using the four ribonucleoside triphosphates as substrates	0.704619	2793	2889	Unknown
COG000069	VtoE	214687	Musa acuminata subsp. malaccensis	Weakly supported	Weakly supported	origin = virus, long branching recipient	1.45552	91.8	85.4	ENZYMATIC POLYPROTEIN-RELATED	0.9934	1372	polyprotein	0.647557	1535	1954	Cytoplasm
COG000235	VtoE	214687	Musa acuminata subsp. malaccensis	Weakly supported	Weakly supported	origin = virus, long branching recipient	0.296931	root	root	PHOTOSYSTEM II PROTEIN D1	1	844	Photosystem II (PSII) is a light-driven water plastoquinone oxidoreductase that uses light energy to abstract electrons from H(2)O, generating O(2) and a proton gradient subsequently used for ATP formation	0.519651	916	916	Unknown
COG002439	VtoE	109478	Myotis brandtii	Weakly supported	Weakly supported	origin = eukaryotic, long branching recipient	3.36655	83.7	98	ZINC FINGER AND SCAN DOMAIN-CONTAINING PROTEIN 16	1	1	Borna disease virus P40 protein	0.985714	140	140	Nucleus
COG000688	VtoE	5762	Naegleria gruberi	10239	Viruses	origin = unkn	0.568126	92.9	95.7	SER/THR PROTEIN PHOSPHATASE SUPERFAMILY (AFU_ORTHOLOGUE AFUA_1G14840)	1	272	Calcineurin-like phosphoesterase	0.356643	429	435	Cytoplasm
COG000688	VtoE	5762	Naegleria gruberi	10239	Viruses	origin = unkn	0.498323	92.9	95.7	SER/THR PROTEIN PHOSPHATASE SUPERFAMILY (AFU_ORTHOLOGUE AFUA_1G14840)	1	272	Calcineurin-like phosphoesterase	0.356643	429	435	Unknown
COG005894	VtoE	5762	Naegleria gruberi	10239	Viruses	origin = virus	1.7769	100	root	BCS1 AAA-TYPE ATPASE	1	11	BCS1 N terminal	0.538462	13	15	Cytoplasm
COG000113	VtoE	5762	Naegleria gruberi	307448	Hyphantria cunea granulovirus	origin = eukaryotic	0.744416	90.8	89.7	UBIQUITIN	0.9609	1279	ubiquitin	0.414104	1333	1402	Unknown
COG002826	VtoE	5762	Naegleria gruberi	455363	unclassified Phycodnaviridae	origin = unkn, cousin unclear	1.27111	99.2	95.7	UVRD / RECB / PCRA DNA HELICASE FAMILY MEMBER	1	96	ATP-dependent DNA helicase activity	0.862745	102	104	Unknown
COG006044	VtoE	5762	Naegleria gruberi	455363	unclassified Phycodnaviridae	origin = virus	6.84432	85.1	93.1	OVARIAN-SPECIFIC SERINE/THREONINE-PROTEIN KINASE LOK-RELATED	0.8333	6	Protein tyrosine kinase	0.25	8	14	Unknown
COG000245	VtoE	5762	Naegleria gruberi	549779	Mimiviridae	origin = eukaryotic, cousin unclear	0.701484	86.1	94.5	METHIONYL-TRNA SYNTHETASE	0.5899	456	Is required not only for elongation of protein synthesis but also for the initiation of all mRNA translation through initiator tRNA(fMet) aminoacylation	0.461712	888	889	Cytoplasm
COG001438	VtoE	5762	Naegleria gruberi	549779	Mimiviridae	origin = eukaryotic	1.32187	93.3	85.1	MANNOSYL PHOSPHORYLINOSITOL CERAMIDE SYNTHASE	1	181	Glycosyltransferase sugar-binding region containing DXD motif	0.502242	223	229	Unknown
COG004760	VtoE	5762	Naegleria gruberi	549779	Mimiviridae	origin = unkn, cousin unclear	0.634844	94.4	94.8	HOMOCYSTEINE/CYSTEINE SYNTHASE	0.85	20	cystathionine gamma-synthase activity	0.695652	23	29	Cytoplasm
COG008182	VtoE	5762	Naegleria gruberi	549779	Mimiviridae	origin = virus	2.88891	87.8	root	No annotation	0	0	no annotation	0	0	7	Nucleus
COG002433	VtoE	5762	Naegleria gruberi	558016	Alphabaculovirus	origin = unkn, cousin unclear	0.446446	89.9	82.3	UBIQUITIN	0.9925	134	ubiquitin	0.514706	136	140	Unknown
COG000616	VtoE	5762	Naegleria gruberi	985780	unclassified Mimiviridae	origin = eukaryotic	0.20949	82.1	88.9	3'-5' EXONUCLEASE ERI1-RELATED	0.9938	324	Exonuclease	0.316456	474	478	Cytoplasm
COG001389	VtoE	5762	Naegleria gruberi	1513234	Cafeteriavirus	origin = unkn	0.745819	88	81.4	CALCIUM-ACTIVATED CHLORIDE CHANNEL REGULATOR	0.756	168	Hint-domain	0.560538	223	236	Cytoplasm
COG000098	VtoE	5762	Naegleria gruberi	1977631	Catovirus CTV1	origin = eukaryotic	1.10145	94	82.4	DUAL SPECIFICITY PROTEIN PHOSPHATASE	0.3823	1512	Dual specificity phosphatase, catalytic domain	0.230013	1526	1556	Unknown
COG001114	VtoE	5762	Naegleria gruberi	1977631	Catovirus CTV1	origin = eukaryotic, cousin unclear	1.48511	95.7	93.4	POLY ADP-RIBOSE GLYCOHYDROLASE	0.9858	282	poly(ADP-ribose) glycohydrolase activity	0.409722	288	292	Cytoplasm
COG000889	VtoE	5762	Naegleria gruberi	1977639	Klosneuvirus	origin = virus	1.34552	84.5	81.8	DUF814-RELATED	1	56	Domain of unknown function (DUF814)	0.296296	135	359	Unknown
COG006374	VtoE	5762	Naegleria gruberi	2029657	Bordetella phage vB_BbrM_PHB04	origin = virus	1.01754	96.7	root	No annotation	0	0	no annotation	0	0	13	Unknown
COG000283	VtoE	5762	Naegleria gruberi	2487774	Sylvanvirus sp.	origin = unkn	0.440859	85.7	82.9	UNCHARACTERIZED	0.9871	542	2OG-Fe(II) oxygenase superfamily	0.224905	787	801	Cytoplasm
COG000113	VtoE	5762	Naegleria gruberi	2732007	Nucleocytoviricota	origin = eukaryotic	1.42546	91.4	91.5	UBIQUITIN	0.9609	1279	ubiquitin	0.414104	1333	1402	Unknown
COG000429	VtoE	5762	Naegleria gruberi	2732007	Nucleocytoviricota	origin = unkn, cousin unclear	1.09931	82.8	91.6	NHL REPEAT-CONTAINING PROTEIN 2	0.8098	326	NHL repeat	0.219224	593	606	Unknown
COG002809	VtoE	5762	Naegleria gruberi	2732007	Nucleocytoviricota	origin = virus	1.90423	85.6	83.1	UBIQUITIN-PROTEIN LIGASE E3A-RELATED	0.3736	91	COGs COG5184 Alpha-tubulin suppressor and related RCC1 domain-containing protein	0.813187	91	105	Cytoplasm
COG004632	VtoE	5762	Naegleria gruberi	2732007	Nucleocytoviricota	origin = virus	1.71038	86.4	root	No annotation	0	0	glycosyl transferase	0.444444	9	32	Golgi_apparatus
COG006240	VtoE	5762	Naegleria gruberi	2732007	Nucleocytoviricota	origin = eukaryotic, cousin unclear	1.61051	87.6	82.2	E3 UBIQUITIN-PROTEIN LIGASE PRAJA	0.3333	12	RING-H2 zinc finger domain	0.454545	11	13	Nucleus
COG004151	VtoE	5762	Naegleria gruberi	2732523	Megaviricetes	origin = virus	2.23753	83	84.1	D123 PROTEIN	1	2	D123	0.666667	6	43	Unknown
COG006918	VtoE	5762	Naegleria gruberi	2732523	Megaviricetes	origin = eukaryotic	1.50327	89.3	81.2	OS06G0252500 PROTEIN	0.5	4	Galactose oxidase, central domain	0.5	2	10	Cytoplasm
COG000005	VtoE	5762	Naegleria gruberi	Weakly supported	Weakly supported	origin = eukaryotic, long branching recipient	1.81098	99.5	86.8	DRAB5-RELATED	0.2327	10584	Rab subfamily of small GTPases	0.149102	10798	10903	Cytoplasm
COG000068	VtoE	5762	Naegleria gruberi	Weakly supported	Weakly supported	origin = unkn, long branching recipient	1.55493	85.8	81.8	RIBONUCLEOSIDE-DIPHOSPHATE REDUCTASE SMALL CHAIN	0.9972	1762	Ribonucleotide reductase, small chain	0.392931	1924	1961	Unknown
COG000183	VtoE	5762	Naegleria gruberi	Weakly supported	Weakly supported	origin = unkn, long branching recipient	2.00287	84.5	82	DEOXYNUCLEOSIDE KINASE	0.997	1005	Deoxynucleoside kinase	0.522124	1017	1047	Cytoplasm
COG000183	VtoE	5762	Naegleria gruberi	Weakly supported	Weakly supported	origin = unkn, long branching recipient	1.829	85.6	90.4	DEOXYNUCLEOSIDE KINASE	0.997	1005	Deoxynucleoside kinase	0.522124	1017	1047	Mitochondrion
COG000288	VtoE	5762	Naegleria gruberi	Weakly supported	Weakly supported	origin = eukaryotic, long branching recipient	1.11576	93.4	90.9	CARBAMOYLTRANSFERASE FAMILY MEMBER	0.9836	609	carbamoyl-phosphate synthase (glutamine-hydrolyzing) activity	0.188295	786	795	Cytoplasm
COG000304	VtoE	5762	Naegleria gruberi	Weakly supported	Weakly supported	origin = virus, long branching recipient	2.75003	86.8	81.9	OOKINETE PROTEIN, PUTATIVE-RELATED	0.9681	94	Concanavalin A-like lectin/glucanases superfamily	0.951389	144	770	Cytoplasm
COG000500	VtoE	5762	Naegleria gruberi	Weakly supported	Weakly supported	origin = virus, long branching recipient	1.30649	96.4	90	AGL056WP	1	2	Domain of unknown function (DUF1768)	0.377778	45	555	Nucleus
COG000951	VtoE	5762	Naegleria gruberi	Weakly supported	Weakly supported	origin = virus, long branching recipient	3.28251	90.4	87.2	LITTLE ELONGATION COMPLEX SUBUNIT 2	1	1	NUDIX domain	0.5	2	341	Cytoplasm
COG001082	VtoE	5762	Naegleria gruberi	Weakly supported	Weakly supported	origin = unkn, long branching recipient	2.12205	93	88.5	RNA METHYLASE-RELATED	1	154	Belongs to the N(4) N(6)-methyltransferase family	0.41806	299	300	Nucleus
COG002311	VtoE	5762	Naegleria gruberi	Weakly supported	Weakly supported	origin = virus, sister unclear	1.44106	92.9	81.8	PROCOLLAGEN-LYSINE,2-OXOGLUTARATE 5-DIOXYGENASE/GLYCOSYLTRANSFERASE 25 FAMILY MEMBER	1	48	Glycosyltransferase family 25 (LPS biosynthesis protein)	0.259259	135	149	Unknown
COG002809	VtoE	5762	Naegleria gruberi	Weakly supported	Weakly supported	origin = virus, sister unclear	1.79126	83.1	root	UBIQUITIN-PROTEIN LIGASE E3A-RELATED	0.3736	91	COGs COG5184 Alpha-tubulin suppressor and related RCC1 domain-containing protein	0.813187	91	105	Nucleus
COG004707	VtoE	5762	Naegleria gruberi	Weakly supported	Weakly supported	origin = virus, sister unclear	1.50673	90.8	root	METHYLTRANSFERASE	1	7	Methyltransferase domain	0.965517	29	30	Unknown
COG005478	VtoE	5762	Naegleria gruberi	Weakly supported	Weakly supported	origin = virus, long branching recipient	3.56254	91	100	3-5 EXONUCLEASE	1	18	3'-5' exonuclease	1	18	19	Nucleus
COG000380	VtoE	72520	Nannochloropsis gaditana	2732007	Nucleocytoviricota	origin = virus	0.780676	97.6	86.9	No annotation	0	0	Predicted membrane protein (DUF2177)	0.735537	242	649	Endoplasmic_reticulum
COG002361	VtoE	72520	Nannochloropsis gaditana	2732007	Nucleocytoviricota	origin = unkn	0.892263	89.9	95.5	ENDONUCLEASE/EXONUCLEASE/PHOSPHATASE FAMILY PROTEIN (AFU_ORTHOLOGUE AFUA_3G09210)	0.984	125	Endonuclease exonuclease phosphatase	0.951049	143	146	Lysosome/Vacuole
COG002448	VtoE	72520	Nannochloropsis gaditana	2732007	Nucleocytoviricota	origin = unkn	1.41143	94	95.3	IRON-SULFUR DOMAIN CONTAINING PROTEIN	1	120	Rieske [2Fe-2S] domain	0.619469	113	139	Plastid
COG003583	VtoE	72520	Nannochloropsis gaditana	2732007	Nucleocytoviricota	origin = virus	2.73962	97.4	root	CHLOROPHYLL SYNTHASE	1	53	Catalyzes the prenylation of para-hydroxybenzoate (PHB) with an all-trans polyprenyl group	0.383333	60	63	Cell_membrane
COG000068	VtoE	72520	Nannochloropsis gaditana	Weakly supported	Weakly supported	origin = unkn, long branching recipient	2.26045	95.3	89.3	RIBONUCLEOSIDE-DIPHOSPHATE REDUCTASE SMALL CHAIN	0.9972	1762	Ribonucleotide reductase, small chain	0.392931	1924	1961	Plastid
COG002895	VtoE	45351	Nematostella vectensis	10239	Viruses	origin = unkn	0.653808	88.2	86.9	GLYCOGENIN SUBFAMILY MEMBER	1	98	transferase activity, transferring glycosyl groups	0.836735	98	100	Unknown
COG001414	VtoE	45351	Nematostella vectensis	10662	Myoviridae	origin = eukaryotic	1.23176	83.9	89.7	No annotation	0	0	Domain of unknown function (DUF4326)	0.615385	221	233	Nucleus
COG002552	VtoE	367110	Neurospora crassa OR74A	181084	Prasinovirus	origin = unkn, cousin unclear	0.495179	80.2	90.5	No annotation	0	0	RNA ligase	0.91129	124	129	Unknown
COG001278	VtoE	367110	Neurospora crassa OR74A	Weakly supported	Weakly supported	origin = virus, long branching recipient	1.84119	root	root	UVRD / RECB / PCRA DNA HELICASE FAMILY MEMBER	1	221	UvrD/REP helicase N-terminal domain	0.62069	29	257	Mitochondrion
COG000509	VtoE	37653	Octopus bimaculoides	10239	Viruses	origin = virus	0.427295	root	root	No annotation	0	0	ATPase activity, uncoupled	1	538	546	Nucleus
COG000509	VtoE	37653	Octopus bimaculoides	10239	Viruses	origin = virus	0.0317709	root	root	No annotation	0	0	ATPase activity, uncoupled	1	538	546	Cytoplasm
COG000433	VtoE	37653	Octopus bimaculoides	10442	Baculoviridae	origin = unkn	1.22077	84.3	91.1	INHIBITOR OF APOPTOSIS	0.9693	587	Inhibitor of Apoptosis domain	0.256711	596	604	Unknown
COG000045	VtoE	37653	Octopus bimaculoides	Weakly supported	Weakly supported	origin = unkn, long branching recipient	1.50811	99	87.9	DNA POLYMERASE CATALYTIC SUBUNIT	0.9057	2090	3'-5' exonuclease activity	0.66927	2561	2589	Nucleus
COG000721	VtoE	37653	Octopus bimaculoides	Weakly supported	Weakly supported	origin = unkn, long branching recipient	2.79959	84.7	90.5	No annotation	0	0	Rhabdovirus nucleocapsid protein	0.971223	417	419	Cytoplasm
COG005648	VtoE	37653	Octopus bimaculoides	Weakly supported	Weakly supported	origin = virus, long branching recipient	2.67139	97.5	root	CYTOCHROME B5	1	2	Ceramide hydroxylase involved in the alpha-hydroxylation of sphingolipid-associated very long chain fatty acids	0.777778	9	17	Unknown
COG000639	VtoE	34765	Oikopleura dioica	10239	Viruses	origin = unkn, cousin unclear	1.69821	80.3	82.2	ZINC FINGER CCHC DOMAIN CONTAINING PROTEIN	0.7778	18	zinc finger	0.854881	379	461	Endoplasmic_reticulum
COG000856	VtoE	34765	Oikopleura dioica	10239	Viruses	origin = unkn	0.99458	83.3	91.8	PEPTIDE DEFORMYLASE	1	214	Removes the formyl group from the N-terminal Met of newly synthesized proteins	0.758904	365	367	Nucleus
COG000153	VtoE	34765	Oikopleura dioica	2732007	Nucleocytoviricota	origin = eukaryotic	0.795675	99.5	95.5	CRYPTOCHROME	0.9979	964	FAD binding domain of DNA photolyase	0.221429	1120	1136	Unknown
COG000367	VtoE	34765	Oikopleura dioica	2732007	Nucleocytoviricota	origin = eukaryotic	0.945927	93.7	90.4	ALPHA/BETA-HYDROLASES SUPERFAMILY PROTEIN	0.9199	537	Lipase (class 3)	0.37156	654	667	Endoplasmic_reticulum
COG000014	VtoE	34765	Oikopleura dioica	Weakly supported	Weakly supported	origin = prokaryotic, long branching recipient	1.36739	90.3	84.7	DNAJ HOMOLOG SUBFAMILY C MEMBER	0.3541	3253	ATP binding to DnaK triggers the release of the substrate protein, thus completing the reaction cycle	0.315643	5747	5826	Nucleus
COG000153	VtoE	34765	Oikopleura dioica	Weakly supported	Weakly supported	origin = eukaryotic, long branching recipient	1.15579	85.1	92.4	CRYPTOCHROME	0.9979	964	FAD binding domain of DNA photolyase	0.221429	1120	1136	Mitochondrion
COG000209	VtoE	34765	Oikopleura dioica	Weakly supported	Weakly supported	origin = eukaryotic, long branching recipient	1.98105	93.9	80.2	ALPHA-KETOGLUTARATE-DEPENDENT DIOXYGENASE ALKB HOMOLOG 3	0.6376	356	2OG-Fe(II) oxygenase superfamily	0.391032	959	973	Nucleus
COG000741	VtoE	34765	Oikopleura dioica	Weakly supported	Weakly supported	origin = eukaryotic, long branching recipient	5.87685	94.4	84.7	BIFUNCTIONAL POLYNUCLEOTIDE PHOSPHATASE/KINASE	0.9975	395	Polynucleotide kinase 3 phosphatase	0.383459	399	407	Cytoplasm
COG000950	VtoE	34765	Oikopleura dioica	Weakly supported	Weakly supported	origin = unkn, long branching recipient	1.02684	95.2	94.5	SLR1628 PROTEIN	1	68	Uncharacterized protein conserved in bacteria (DUF2237)	0.517647	340	341	Extracellular
COG001630	VtoE	34765	Oikopleura dioica	Weakly supported	Weakly supported	origin = eukaryotic, long branching recipient	2.21788	87.5	83	EUKARYOTIC TRANSLATION INITIATION FACTOR	1	200	translation initiation factor activity	0.835821	201	202	Nucleus
COG003396	VtoE	34765	Oikopleura dioica	Weakly supported	Weakly supported	origin = virus, long branching recipient	2.05217	83.4	85	C-C CHEMOKINE RECEPTOR TYPE 8	0.9857	70	7 transmembrane receptor (rhodopsin family)	0.985714	70	70	Endoplasmic_reticulum
COG003430	VtoE	34765	Oikopleura dioica	Weakly supported	Weakly supported	origin = unkn, long branching recipient	2.20095	81	root	UBIQUITIN CARBOXYL-TERMINAL HYDROLASE	0.9839	62	Belongs to the peptidase C19 family	0.603175	63	68	Nucleus
COG000023	VtoE	6020	Oligohymenophorea	455363	unclassified Phycodnaviridae	origin = unkn	0.438501	90.5	96	MYOSIN	0.6258	3771	translation initiation factor activity	0.423998	3842	3892	Nucleus
COG000450	VtoE	6020	Oligohymenophorea	549779	Mimiviridae	origin = prokaryotic	0.301153	95.4	96.2	INOSINE-5-MONOPHOSPHATE DEHYDROGENASE RELATED	0.9438	427	Catalyzes the conversion of inosine 5'-phosphate (IMP) to xanthosine 5'-phosphate (XMP), the first committed and rate- limiting step in the de novo synthesis of guanine nucleotides, and therefore plays an important role in the regulation of cell growth	0.698795	581	589	Cytoplasm
COG002826	VtoE	6020	Oligohymenophorea	549779	Mimiviridae	origin = virus	0.323565	98.9	95.7	UVRD / RECB / PCRA DNA HELICASE FAMILY MEMBER	1	96	ATP-dependent DNA helicase activity	0.862745	102	104	Cytoplasm
COG000312	VtoE	6020	Oligohymenophorea	2732007	Nucleocytoviricota	origin = unkn, cousin unclear	0.318812	92.7	81.5	GLUTAMINE SYNTHETASE	1	595	glutamine synthetase	0.484646	749	755	Cytoplasm
COG000793	VtoE	6020	Oligohymenophorea	2732523	Megaviricetes	origin = eukaryotic	0.128687	82.3	95.7	RING FINGER AND CHY ZINC FINGER DOMAIN-CONTAINING PROTEIN 1	0.9948	383	Zinc-ribbon	0.205729	384	388	Nucleus
COG001389	VtoE	6020	Oligohymenophorea	2732523	Megaviricetes	origin = virus, cousin unclear	0.092059	95	93.4	CALCIUM-ACTIVATED CHLORIDE CHANNEL REGULATOR	0.756	168	Hint-domain	0.560538	223	236	Cytoplasm
COG006865	VtoE	6020	Oligohymenophorea	2732523	Megaviricetes	origin = virus	0.397099	root	root	TARGET OF ERK KINASE MPK-1	0.4286	7	Ring finger	0.428571	7	10	Cell_membrane
COG000036	VtoE	6020	Oligohymenophorea	Weakly supported	Weakly supported	origin = eukaryotic, long branching donor	0.399143	91.4	88.9	PROTEIN PHOSPHATASE 2C	0.6993	2820	protein serine/threonine phosphatase activity	0.215374	2888	2939	Cytoplasm
COG006933	VtoE	4762	Oomycota	455363	unclassified Phycodnaviridae	origin = virus	0.301242	93.8	root	MAGNESIUM TRANSPORTER NIPA8-RELATED	0.5	8	Magnesium transporter NIPA	0.6	10	10	Cell_membrane
COG004768	VtoE	4762	Oomycota	2732007	Nucleocytoviricota	origin = virus	0.568629	91.8	root	No annotation	0	0	PQ loop repeat	0.571429	21	29	Endoplasmic_reticulum
COG000818	VtoE	8665	Ophiophagus hannah	Weakly supported	Weakly supported	origin = eukaryotic, long branching recipient	8.33637	94.5	95.6	EUKARYOTIC TRANSLATION INITIATION FACTOR 2-ALPHA KINASE EIF2-ALPHA KINASE -RELATED	0.9694	359	Protein tyrosine kinase	0.206989	372	378	Mitochondrion
COG000043	VtoE	33154	Opisthokonta	10239	Viruses	origin = unkn	0.241117	80.4	84.6	THYMIDYLATE SYNTHASE 1	0.701	2381	Thymidylate synthase	0.35328	2607	2647	Mitochondrion
COG000116	VtoE	33154	Opisthokonta	10239	Viruses	origin = eukaryotic	0.083144	98.9	83.7	TRANSLATION FACTOR	0.9949	1180	regulation of response to stimulus	0.737885	1362	1385	Cytoplasm
COG002012	VtoE	33154	Opisthokonta	2732007	Nucleocytoviricota	origin = prokaryotic	0.134379	84	93	HYALURONAN SYNTHASE	1	117	extracellular polysaccharide metabolic process	0.164634	164	164	Endoplasmic_reticulum
COG003654	VtoE	33154	Opisthokonta	2732007	Nucleocytoviricota	origin = unkn	0.277916	90.8	92	No annotation	0	0	no annotation	0	0	60	Nucleus
COG003936	VtoE	33154	Opisthokonta	Weakly supported	Weakly supported	origin = virus, long branching donor	0.483451	root	root	FUKUTIN RELATED PROTEIN	0.9565	46	LicD family	0.265306	49	49	Golgi_apparatus
COG000045	VtoE	9258	Ornithorhynchus anatinus	Weakly supported	Weakly supported	origin = unkn, long branching recipient	1.60284	100	94.5	DNA POLYMERASE CATALYTIC SUBUNIT	0.9057	2090	3'-5' exonuclease activity	0.66927	2561	2589	Cytoplasm
COG000162	VtoE	9258	Ornithorhynchus anatinus	Weakly supported	Weakly supported	origin = eukaryotic, long branching recipient	4.85605	81.4	95.2	UBIQUITIN CARBOXYL-TERMINAL HYDROLASE	1	1081	Belongs to the peptidase C19 family	0.372835	1097	1116	Cytoplasm
COG000235	VtoE	39947	Oryza sativa Japonica Group	10239	Viruses	origin = virus	0.00682943	root	root	PHOTOSYSTEM II PROTEIN D1	1	844	Photosystem II (PSII) is a light-driven water plastoquinone oxidoreductase that uses light energy to abstract electrons from H(2)O, generating O(2) and a proton gradient subsequently used for ATP formation	0.519651	916	916	Unknown
COG000043	VtoE	39947	Oryza sativa Japonica Group	Weakly supported	Weakly supported	origin = unkn, long branching recipient	1.35717	83.7	93.5	THYMIDYLATE SYNTHASE 1	0.701	2381	Thymidylate synthase	0.35328	2607	2647	Unknown
COG005141	VtoE	70447	Ostreococcus	181084	Prasinovirus	origin = virus	1.12047	95.1	94.2	UNNAMED PRODUCT	0.5	2	COG3210 Large exoproteins involved in heme utilization or adhesion	1	1	23	Unknown
COG000639	VtoE	436017	Ostreococcus lucimarinus CCE9901	181084	Prasinovirus	origin = unkn	0.644387	94.1	82.3	ZINC FINGER CCHC DOMAIN CONTAINING PROTEIN	0.7778	18	zinc finger	0.854881	379	461	Unknown
COG006199	VtoE	436017	Ostreococcus lucimarinus CCE9901	455363	unclassified Phycodnaviridae	origin = virus	1.62832	86.6	root	No annotation	0	0	no annotation	0	0	14	Unknown
COG003314	VtoE	436017	Ostreococcus lucimarinus CCE9901	2732523	Megaviricetes	origin = prokaryotic	1.74917	82.5	88.4	No annotation	0	0	no annotation	0	0	75	Unknown
COG000003	VtoE	436017	Ostreococcus lucimarinus CCE9901	Weakly supported	Weakly supported	origin = eukaryotic, long branching recipient	1.96352	90.6	95.4	ATP-DEPENDENT RNA HELICASE	0.4875	2482	RNA-protein covalent cross-linking	0.962677	11387	12749	Cytoplasm
COG000639	VtoE	70448	Ostreococcus tauri	2732007	Nucleocytoviricota	origin = unkn	0.893425	88	92.6	ZINC FINGER CCHC DOMAIN CONTAINING PROTEIN	0.7778	18	zinc finger	0.854881	379	461	Cytoplasm
COG002884	VtoE	70448	Ostreococcus tauri	Weakly supported	Weakly supported	origin = virus, long branching recipient	4.33942	94.5	root	BAX INHIBITOR-RELATED	1	55	Belongs to the BI1 family	0.740741	27	101	Unknown
COG000381	VtoE	57506	Oxytrichidae	10487	Iridovirus	origin = unkn, cousin unclear	0.44937	86.7	90.2	GDP-L-FUCOSE SYNTHASE	0.9973	370	Catalyzes the two-step NADP-dependent conversion of GDP- 4-dehydro-6-deoxy-D-mannose to GDP-fucose, involving an epimerase and a reductase reaction	0.416149	644	646	Cytoplasm
COG000383	VtoE	57506	Oxytrichidae	455363	unclassified Phycodnaviridae	origin = eukaryotic	0.299946	98.1	81.7	SKP1	0.9934	608	Belongs to the SKP1 family	0.558917	628	644	Cytoplasm
COG005842	VtoE	57506	Oxytrichidae	2487771	Satyrvirus sp.	origin = eukaryotic, cousin unclear	0.870907	82	root	No annotation	0	0	NAD-dependent histone deacetylase activity (H3-K14 specific)	0.4	5	16	Cytoplasm
COG000040	VtoE	57506	Oxytrichidae	2732007	Nucleocytoviricota	origin = eukaryotic	0.805978	91.1	99.6	TWO-COMPONENT HISTIDINE KINASE	0.4898	1374	PhoQ Sensor	0.307939	2809	2838	Cytoplasm
COG006859	VtoE	57506	Oxytrichidae	2732523	Megaviricetes	origin = virus	0.38712	root	root	TARGET OF ERK KINASE MPK-1	0.375	8	E3 ubiquitin-protein ligase	0.375	8	10	Unknown
COG000733	VtoE	57506	Oxytrichidae	Weakly supported	Weakly supported	origin = unkn, long branching recipient	1.88122	88.9	86.2	POLYNUCLEOTIDYL TRANSFERASE, RIBONUCLEASE H-LIKE SUPERFAMILY PROTEIN	0.9701	268	RNase H	0.298246	399	412	Nucleus
COG002611	VtoE	57506	Oxytrichidae	Weakly supported	Weakly supported	origin = virus, sister unclear	0.47974	88.1	93.3	No annotation	0	0	GDP-fucose protein O-fucosyltransferase	1	96	123	Cytoplasm
COG000818	VtoE	5888	Paramecium tetraurelia	549779	Mimiviridae	origin = eukaryotic	1.01762	81.6	88.9	EUKARYOTIC TRANSLATION INITIATION FACTOR 2-ALPHA KINASE EIF2-ALPHA KINASE -RELATED	0.9694	359	Protein tyrosine kinase	0.206989	372	378	Nucleus
COG000098	VtoE	5888	Paramecium tetraurelia	2732523	Megaviricetes	origin = eukaryotic	0.780285	88.4	81.6	DUAL SPECIFICITY PROTEIN PHOSPHATASE	0.3823	1512	Dual specificity phosphatase, catalytic domain	0.230013	1526	1556	Unknown
COG006623	VtoE	5888	Paramecium tetraurelia	2732523	Megaviricetes	origin = virus	1.75069	root	root	RING FINGER PROTEIN 141-RELATED	0.3333	3	Source PGD	0.333333	3	11	Unknown
COG001074	VtoE	5888	Paramecium tetraurelia	Weakly supported	Weakly supported	origin = eukaryotic, long branching recipient	3.61369	87.2	93.7	TUBULIN TYROSINE LIGASE	0.8557	291	Tubulin-tyrosine ligase family protein	0.328859	298	302	Unknown
COG000235	VtoE	39717	Paulinella chromatophora	10239	Viruses	origin = virus	0.0112083	root	root	PHOTOSYSTEM II PROTEIN D1	1	844	Photosystem II (PSII) is a light-driven water plastoquinone oxidoreductase that uses light energy to abstract electrons from H(2)O, generating O(2) and a proton gradient subsequently used for ATP formation	0.519651	916	916	Unknown
COG001041	VtoE	39717	Paulinella chromatophora	10239	Viruses	origin = virus	1.45661	98.3	87.2	FLAVIN MONOAMINE OXIDASE	0.5943	212	Flavin containing amine oxidoreductase	0.484615	260	311	Unknown
COG001414	VtoE	39717	Paulinella chromatophora	10239	Viruses	origin = unkn	0.667378	81.8	83.8	No annotation	0	0	Domain of unknown function (DUF4326)	0.615385	221	233	Nucleus
COG004530	VtoE	39717	Paulinella chromatophora	10239	Viruses	origin = virus	1.43061	88.7	root	ASPARTATE BETA-HYDROXYLASE DOMAIN-CONTAINING PROTEIN 2	1	29	Aspartyl Asparaginyl beta-hydroxylase	0.419355	31	34	Unknown
COG007725	VtoE	39717	Paulinella chromatophora	10487	Iridovirus	origin = prokaryotic, cousin unclear	0.367138	82.7	87.9	OS05G0596200 PROTEIN	1	1	Psort location Cytoplasmic, score 8	1	5	8	Unknown
COG000938	VtoE	39717	Paulinella chromatophora	346673	Coccolithovirus	origin = eukaryotic, cousin unclear	0.339071	83.3	99.8	PTHR35596	0.9675	154	Uncharacterized protein conserved in bacteria (DUF2263)	0.957704	331	343	Unknown
COG004913	VtoE	39717	Paulinella chromatophora	455363	unclassified Phycodnaviridae	origin = virus	1.73349	91.7	88	No annotation	0	0	no annotation	0	0	27	Unknown
COG000379	VtoE	39717	Paulinella chromatophora	549779	Mimiviridae	origin = unkn	0.531724	95	91.9	EBNA2 BINDING PROTEIN P100	1	233	Staphylococcal nuclease homologue	0.806641	512	650	Unknown
COG000858	VtoE	39717	Paulinella chromatophora	1513234	Cafeteriavirus	origin = eukaryotic	0.34533	92.4	100	TYROSINE-TRNA LIGASE	0.8756	209	Belongs to the class-I aminoacyl-tRNA synthetase family	0.453782	357	366	Unknown
COG003716	VtoE	39717	Paulinella chromatophora	1977639	Klosneuvirus	origin = virus, cousin unclear	2.01259	80.9	81.6	THISBE	0.6	5	no annotation	0	0	57	Unknown
COG003722	VtoE	39717	Paulinella chromatophora	1977639	Klosneuvirus	origin = virus	1.48601	93.6	80.7	METHYLTRANSFERASE, FKBM FAMILY PROTEIN	0.9643	28	tRNA (guanine(37)-N(1))-methyltransferase activity	0.313725	51	57	Unknown
COG000209	VtoE	39717	Paulinella chromatophora	2023203	Pithoviridae	origin = unkn	1.20129	89.5	82.2	ALPHA-KETOGLUTARATE-DEPENDENT DIOXYGENASE ALKB HOMOLOG 3	0.6376	356	2OG-Fe(II) oxygenase superfamily	0.391032	959	973	Mitochondrion
COG000113	VtoE	39717	Paulinella chromatophora	2732007	Nucleocytoviricota	origin = eukaryotic	0.077826	82.7	91	UBIQUITIN	0.9609	1279	ubiquitin	0.414104	1333	1402	Nucleus
COG000003	VtoE	39717	Paulinella chromatophora	Weakly supported	Weakly supported	origin = virus, long branching recipient	0.337983	84.9	root	ATP-DEPENDENT RNA HELICASE	0.4875	2482	RNA-protein covalent cross-linking	0.962677	11387	12749	Unknown
COG000069	VtoE	39717	Paulinella chromatophora	Weakly supported	Weakly supported	origin = virus, long branching recipient	0.788423	99.1	95.8	ENZYMATIC POLYPROTEIN-RELATED	0.9934	1372	polyprotein	0.647557	1535	1954	Mitochondrion
COG000183	VtoE	39717	Paulinella chromatophora	Weakly supported	Weakly supported	origin = unkn, long branching recipient	2.28354	86.7	85.6	DEOXYNUCLEOSIDE KINASE	0.997	1005	Deoxynucleoside kinase	0.522124	1017	1047	Mitochondrion
COG001151	VtoE	39717	Paulinella chromatophora	Weakly supported	Weakly supported	origin = virus, long branching recipient	2.02352	95	root	No annotation	0	0	no annotation	0	0	286	Unknown
COG001209	VtoE	39717	Paulinella chromatophora	Weakly supported	Weakly supported	origin = virus, long branching recipient	2.55749	88.8	82.6	No annotation	0	0	no annotation	0	0	272	Unknown
COG002608	VtoE	39717	Paulinella chromatophora	Weakly supported	Weakly supported	origin = eukaryotic, long branching recipient	2.13224	88.5	99.4	BETA1,3-GALACTOSYLTRANSFERASE	0.9	20	Glycosyltransferase that generates the core 1 O-glycan Gal-beta1-3GalNAc-alpha1-Ser Thr (T antigen), which is a precursor for many extended O-glycans in glycoproteins	0.333333	18	123	Extracellular
COG002870	VtoE	39717	Paulinella chromatophora	Weakly supported	Weakly supported	origin = virus, long branching recipient	1.25164	87.8	87.5	No annotation	0	0	Chaperone of endosialidase	0.368421	38	102	Nucleus
COG004147	VtoE	39717	Paulinella chromatophora	Weakly supported	Weakly supported	origin = virus, long branching donor	2.4311e-06	100	root	No annotation	0	0	Bacteriophage scaffolding protein D	1	43	43	Cytoplasm
COG004953	VtoE	39717	Paulinella chromatophora	Weakly supported	Weakly supported	origin = virus, long branching recipient	5.06063	100	91.9	GLYCOSYLTRANSFERASE	1	20	Glycosyl transferases group 1	1	24	26	Mitochondrion
COG005486	VtoE	39717	Paulinella chromatophora	Weakly supported	Weakly supported	origin = eukaryotic, long branching recipient	2.1133	98.8	root	No annotation	0	0	Glycosyltransferase family 92	0.625	8	19	Cytoplasm
COG000845	VtoE	1314962	Perkinsela sp. CCAP 1560/4	10239	Viruses	origin = virus, cousin unclear	0.492096	95.1	87.6	PTHR47810	0.9944	355	DNA ligase (ATP) activity	0.924119	369	371	Mitochondrion
COG001982	VtoE	1314962	Perkinsela sp. CCAP 1560/4	10239	Viruses	origin = virus	0.315851	100	root	DNA POLYMERASE I	1	153	DNA polymerase family A	0.988024	167	167	Mitochondrion
COG000710	VtoE	1314962	Perkinsela sp. CCAP 1560/4	2732007	Nucleocytoviricota	origin = eukaryotic, cousin unclear	0.815616	90.6	87.1	EIF-1A	0.9951	406	Seems to be required for maximal rate of protein biosynthesis	0.707617	407	423	Nucleus
COG000846	VtoE	1314962	Perkinsela sp. CCAP 1560/4	2732007	Nucleocytoviricota	origin = unkn	1.43555	81.6	94.5	GLUCOSAMINE 6-PHOSPHATE N-ACETYLTRANSFERASE	0.9971	339	Glucosamine 6-phosphate	0.222527	364	371	Unknown
COG000139	VtoE	423536	Perkinsus marinus ATCC 50983	2732007	Nucleocytoviricota	origin = unkn	0.610872	100	87.9	DTDP-D-GLUCOSE 4,6-DEHYDRATASE-RELATED	0.7699	969	dTDP-glucose 4,6-dehydratase activity	0.372171	1193	1220	Endoplasmic_reticulum
COG000268	VtoE	4777	Peronosporaceae	Weakly supported	Weakly supported	origin = eukaryotic, long branching recipient	0.236532	89	93.9	POLYMERASE, PUTATIVE-RELATED	0.5458	612	DNA polymerase type B, organellar and viral	0.998794	829	832	Cytoplasm
COG003707	VtoE	4777	Peronosporaceae	Weakly supported	Weakly supported	origin = eukaryotic, long branching donor	0.621795	96.5	99.9	No annotation	0	0	no annotation	0	0	58	Mitochondrion
COG001593	VtoE	556484	Phaeodactylum tricornutum CCAP 1055/1	2732007	Nucleocytoviricota	origin = unkn	1.58216	94.9	86.6	UNNAMED PRODUCT	0.8598	107	repeat protein	0.35	160	206	Unknown
COG001122	VtoE	556484	Phaeodactylum tricornutum CCAP 1055/1	Weakly supported	Weakly supported	origin = eukaryotic, long branching recipient	1.94313	82	86	FE(2+)/MN(2+) TRANSPORTER PCL1	0.9853	136	VIT family	0.74216	287	291	Lysosome/Vacuole
COG000195	VtoE	3218	Physcomitrium patens	10239	Viruses	origin = unkn	1.15673	80.4	87	URACIL-DNA GLYCOSYLASE	0.9941	847	Excises uracil residues from the DNA which can arise as a result of misincorporation of dUMP residues by DNA polymerase or due to deamination of cytosine	0.505976	1004	1012	Cytoplasm
COG006205	VtoE	3218	Physcomitrium patens	2732007	Nucleocytoviricota	origin = eukaryotic	0.428083	91.4	99.2	UNCHARACTERIZED	1	8	Probable N6-adenine methyltransferase	0.666667	6	14	Unknown
COG001390	VtoE	3218	Physcomitrium patens	2732555	Pimascovirales	origin = virus	1.42479	98.5	97.5	SNF2/RAD54 FAMILY MEMBER	0.75	80	N-methyltransferase activity	1	215	236	Cytoplasm
COG000014	VtoE	3218	Physcomitrium patens	Weakly supported	Weakly supported	origin = eukaryotic, long branching recipient	2.13952	84.1	95	DNAJ HOMOLOG SUBFAMILY C MEMBER	0.3541	3253	ATP binding to DnaK triggers the release of the substrate protein, thus completing the reaction cycle	0.315643	5747	5826	Unknown
COG000024	VtoE	3218	Physcomitrium patens	Weakly supported	Weakly supported	origin = unkn, long branching recipient	1.64101	92.2	83.1	DNA-DIRECTED RNA POLYMERASE I SUBUNIT 2	0.9997	3308	DNA-dependent RNA polymerase catalyzes the transcription of DNA into RNA using the four ribonucleoside triphosphates as substrates	0.58331	3511	3673	Mitochondrion
COG000038	VtoE	3218	Physcomitrium patens	Weakly supported	Weakly supported	origin = unkn, long branching recipient	1.8885	93.8	96.7	DNA-DIRECTED RNA POLYMERASE	0.9996	2582	DNA-dependent RNA polymerase catalyzes the transcription of DNA into RNA using the four ribonucleoside triphosphates as substrates	0.704619	2793	2889	Nucleus
COG000045	VtoE	3218	Physcomitrium patens	Weakly supported	Weakly supported	origin = unkn, long branching recipient	1.51471	95.9	97.4	DNA POLYMERASE CATALYTIC SUBUNIT	0.9057	2090	3'-5' exonuclease activity	0.66927	2561	2589	Cytoplasm
COG000087	VtoE	3218	Physcomitrium patens	Weakly supported	Weakly supported	origin = virus, long branching recipient	1.61282	99.8	100	ATP BINDING PROTEIN-RELATED	0.9993	1453	D5 N terminal like	0.970588	1530	1632	Mitochondrion
COG000087	VtoE	3218	Physcomitrium patens	Weakly supported	Weakly supported	origin = virus, long branching recipient	2.2713	84.6	98.1	ATP BINDING PROTEIN-RELATED	0.9993	1453	D5 N terminal like	0.970588	1530	1632	Unknown
COG000095	VtoE	3218	Physcomitrium patens	Weakly supported	Weakly supported	origin = virus, long branching recipient	2.61082	99.2	84.5	DNA POLYMERASE CATALYTIC SUBUNIT	1	1438	DNA polymerase family B	0.952317	1489	1582	Cytoplasm
COG000195	VtoE	3218	Physcomitrium patens	Weakly supported	Weakly supported	origin = virus, long branching recipient	2.28231	84.3	92.5	URACIL-DNA GLYCOSYLASE	0.9941	847	Excises uracil residues from the DNA which can arise as a result of misincorporation of dUMP residues by DNA polymerase or due to deamination of cytosine	0.505976	1004	1012	Cytoplasm
COG002681	VtoE	67593	Phytophthora sojae	10239	Viruses	origin = virus	1.71366	93.8	root	TRANSPOSASE	1	57	Putative transposase DNA-binding domain	0.924528	106	117	Unknown
COG001508	VtoE	67593	Phytophthora sojae	455363	unclassified Phycodnaviridae	origin = prokaryotic	1.70882	92.3	83.5	UNCHARACTERIZED	0.5294	17	Chaperone of endosialidase	0.361905	210	217	Unknown
COG000043	VtoE	1890364	Planoprotostelium fungivorum	10239	Viruses	origin = unkn	0.804289	80.4	84.6	THYMIDYLATE SYNTHASE 1	0.701	2381	Thymidylate synthase	0.35328	2607	2647	Unknown
COG000203	VtoE	1890364	Planoprotostelium fungivorum	10239	Viruses	origin = unkn, cousin unclear	1.19083	93.8	89.3	MICROTUBULE-ASSOCIATED PROTEINS 1A/1B LIGHT CHAIN 3-RELATED	0.999	954	Belongs to the ATG8 family	0.387565	965	987	Cell_membrane
COG003413	VtoE	1890364	Planoprotostelium fungivorum	10239	Viruses	origin = unkn	1.16714	88.7	83.5	UNCHARACTERIZED	0.5	2	adenosine deaminase-like	0.939394	33	69	Nucleus
COG005405	VtoE	1890364	Planoprotostelium fungivorum	2732007	Nucleocytoviricota	origin = virus	2.59395	root	root	No annotation	0	0	nuclease activity	1	20	20	Nucleus
COG000572	VtoE	1890364	Planoprotostelium fungivorum	2732523	Megaviricetes	origin = eukaryotic	0.916046	90.9	85.1	TRNA-PSEUDOURIDINE SYNTHASE	1	197	Responsible for synthesis of pseudouridine from uracil- 55 in the psi GC loop of transfer RNAs	0.656627	498	501	Nucleus
COG000017	VtoE	1890364	Planoprotostelium fungivorum	Weakly supported	Weakly supported	origin = eukaryotic, long branching recipient	1.65638	81.5	91.8	SNF2/RAD54 HELICASE FAMILY	0.3007	3884	SNF2 family N-terminal domain	0.194991	5031	5096	Cytoplasm
COG000274	VtoE	1890364	Planoprotostelium fungivorum	Weakly supported	Weakly supported	origin = eukaryotic, long branching recipient	3.79216	98.3	100	GLYCOSYL HYDROLASE-RELATED	0.9922	256	Glycosyl hydrolases family 16	0.562195	820	823	Nucleus
COG000549	VtoE	1890364	Planoprotostelium fungivorum	Weakly supported	Weakly supported	origin = eukaryotic, long branching recipient	1.74437	81.4	91.8	BCS1 AAA-TYPE ATPASE	0.9869	459	Belongs to the AAA ATPase family	0.298387	496	516	Endoplasmic_reticulum
COG005751	VtoE	1890364	Planoprotostelium fungivorum	Weakly supported	Weakly supported	origin = virus, long branching recipient	3.6675	84.9	root	No annotation	0	0	no annotation	0	0	17	Unknown
COG000639	VtoE	37360	Plasmodiophora brassicae	10239	Viruses	origin = unkn	1.34672	80.4	86.8	ZINC FINGER CCHC DOMAIN CONTAINING PROTEIN	0.7778	18	zinc finger	0.854881	379	461	Extracellular
COG000639	VtoE	37360	Plasmodiophora brassicae	1977640	Klosneuvirus KNV1	origin = unkn	0.809443	91.9	90.6	ZINC FINGER CCHC DOMAIN CONTAINING PROTEIN	0.7778	18	zinc finger	0.854881	379	461	Nucleus
COG000993	VtoE	37360	Plasmodiophora brassicae	Weakly supported	Weakly supported	origin = virus, sister unclear	0.81392	83	100	No annotation	0	0	no annotation	0	0	329	Unknown
COG000278	VtoE	5820	Plasmodium	10239	Viruses	origin = eukaryotic	0.809181	88.5	86.9	ARGININE/DIAMINOPIMELATE/ORNITHINE DECARBOXYLASE	0.9939	654	Belongs to the Orn Lys Arg decarboxylase class-II family	0.568069	808	813	Cytoplasm
COG000669	VtoE	5820	Plasmodium	Weakly supported	Weakly supported	origin = prokaryotic, long branching donor	0.755183	99	95.9	GTP CYCLOHYDROLASE I	0.9793	290	GTP cyclohydrolase I	0.284424	443	445	Nucleus
COG006240	VtoE	5820	Plasmodium	Weakly supported	Weakly supported	origin = virus, sister unclear	0.297276	82.2	root	E3 UBIQUITIN-PROTEIN LIGASE PRAJA	0.3333	12	RING-H2 zinc finger domain	0.454545	11	13	Cytoplasm
COG000210	VtoE	5823	Plasmodium berghei ANKA	Weakly supported	Weakly supported	origin = virus, long branching recipient	1.34795	83.4	82.7	ALR/ERV	1	808	Erv1 / Alr family	0.990153	914	970	Unknown
COG005851	VtoE	36329	Plasmodium falciparum 3D7	Weakly supported	Weakly supported	origin = virus, long branching recipient	3.72008	root	root	UDP-D-XYLOSE:L-FUCOSE ALPHA-1,3-D-XYLOSYLTRANSFERASE-RELATED	0.9286	14	UDP-D-xylose L-fucose alpha-1,3-D-xylosyltransferase	1	1	16	Nucleus
COG003057	VtoE	1137138	Pleurotus ostreatus PC15	2732007	Nucleocytoviricota	origin = unkn, cousin unclear	0.510078	92.5	87.5	UNCHARACTERIZED	0.5	4	Expressed protein	0.844156	77	89	Golgi_apparatus
COG007801	VtoE	4479	Poaceae	10501	Phycodnaviridae	origin = eukaryotic	1.36432	root	root	E3 UBIQUITIN-PROTEIN LIGASE PRAJA	0.4286	7	cytoplasm protein quality control by the ubiquitin-proteasome system	0.285714	7	7	Cytoplasm
COG001293	VtoE	89957	Polarella glacialis	10239	Viruses	origin = unkn	1.33009	89.9	81.2	RIBITOL-5-PHOSPHATE XYLOSYLTRANSFERASE 1	0.5714	7	alpha-(1->3)-fucosyltransferase activity	0.882353	51	254	Cytoplasm
COG006626	VtoE	89957	Polarella glacialis	181086	Prymnesiovirus	origin = eukaryotic	0.585472	83.3	92	SI:CH211-59O9.10	0.2857	7	protein kinase activity	0.285714	7	11	Unknown
COG000113	VtoE	89957	Polarella glacialis	2732007	Nucleocytoviricota	origin = eukaryotic, cousin unclear	1.32526	86.9	81	UBIQUITIN	0.9609	1279	ubiquitin	0.414104	1333	1402	Unknown
COG000005	VtoE	89957	Polarella glacialis	Weakly supported	Weakly supported	origin = prokaryotic, long branching donor	1.0085	90.9	89.4	DRAB5-RELATED	0.2327	10584	Rab subfamily of small GTPases	0.149102	10798	10903	Unknown
COG000327	VtoE	89957	Polarella glacialis	Weakly supported	Weakly supported	origin = eukaryotic, long branching recipient	1.95934	82.9	82.6	METACASPASE-4	0.9935	619	Caspase domain	0.455571	709	725	Cytoplasm
COG001340	VtoE	89957	Polarella glacialis	Weakly supported	Weakly supported	origin = virus, sister unclear	1.53503	86	85.9	BETA-1,3-GALACTOSYLTRANSFERASE 6	0.3333	3	negative regulation of septation initiation signaling	0.589109	202	246	Unknown
COG004414	VtoE	89957	Polarella glacialis	Weakly supported	Weakly supported	origin = virus, long branching recipient	2.75744	82.7	82.4	No annotation	0	0	Glycolipid 2-alpha-mannosyltransferase	0.625	8	37	Extracellular
COG002951	VtoE	3694	Populus trichocarpa	1685110	unclassified Amalgaviridae	origin = virus	2.30119	98.5	98.6	No annotation	0	0	FAR1 DNA-binding domain	0.744681	47	97	Cytoplasm
COG000030	VtoE	3694	Populus trichocarpa	2732523	Megaviricetes	origin = eukaryotic	0.409222	85.1	85.7	UBIQUITIN-CONJUGATING ENZYME E2	0.9944	3206	protein modification by small protein conjugation	0.406107	3275	3304	Unknown
COG000235	VtoE	3694	Populus trichocarpa	Weakly supported	Weakly supported	origin = virus, long branching recipient	0.924364	root	root	PHOTOSYSTEM II PROTEIN D1	1	844	Photosystem II (PSII) is a light-driven water plastoquinone oxidoreductase that uses light energy to abstract electrons from H(2)O, generating O(2) and a proton gradient subsequently used for ATP formation	0.519651	916	916	Endoplasmic_reticulum
COG000235	VtoE	3694	Populus trichocarpa	Weakly supported	Weakly supported	origin = virus, long branching recipient	0.16917	root	root	PHOTOSYSTEM II PROTEIN D1	1	844	Photosystem II (PSII) is a light-driven water plastoquinone oxidoreductase that uses light energy to abstract electrons from H(2)O, generating O(2) and a proton gradient subsequently used for ATP formation	0.519651	916	916	Extracellular
COG000235	VtoE	3694	Populus trichocarpa	Weakly supported	Weakly supported	origin = virus, long branching recipient	0.311359	root	root	PHOTOSYSTEM II PROTEIN D1	1	844	Photosystem II (PSII) is a light-driven water plastoquinone oxidoreductase that uses light energy to abstract electrons from H(2)O, generating O(2) and a proton gradient subsequently used for ATP formation	0.519651	916	916	Unknown
COG005480	VtoE	3694	Populus trichocarpa	Weakly supported	Weakly supported	origin = virus, long branching recipient	3.19546	95.5	80.8	No annotation	0	0	regulation of translation	1	17	19	Unknown
COG003044	VtoE	133427	Protoceratium reticulatum	455363	unclassified Phycodnaviridae	origin = eukaryotic, cousin unclear	1.32742	85.3	83.9	ISOCITRATE DEHYDROGENASE [NADP]	1	1	no annotation	0	0	90	Mitochondrion
COG000799	VtoE	133427	Protoceratium reticulatum	2732007	Nucleocytoviricota	origin = unkn	0.554333	91.2	97.4	ATP-DEPENDENT CLP PROTEASE PROTEOLYTIC SUBUNIT	1	323	N-methyltransferase activity	0.742466	365	388	Unknown
COG005164	VtoE	133427	Protoceratium reticulatum	2732007	Nucleocytoviricota	origin = virus	1.7342	88.7	82.4	No annotation	0	0	no annotation	0	0	23	Cytoplasm
COG001340	VtoE	133427	Protoceratium reticulatum	2732523	Megaviricetes	origin = unkn	1.83168	85.9	86	BETA-1,3-GALACTOSYLTRANSFERASE 6	0.3333	3	negative regulation of septation initiation signaling	0.589109	202	246	Unknown
COG006513	VtoE	133427	Protoceratium reticulatum	2732523	Megaviricetes	origin = virus	2.54546	86.1	root	No annotation	0	0	Histone methylation protein DOT1	1	1	12	Extracellular
COG000378	VtoE	133427	Protoceratium reticulatum	Weakly supported	Weakly supported	origin = unkn, long branching recipient	3.77679	88.9	84.4	NICOTINAMIDE PHOSPHORIBOSYLTRANSFERASE	1	487	nicotinate-nucleotide diphosphorylase (carboxylating) activity	0.483721	645	651	Unknown
COG000613	VtoE	133427	Protoceratium reticulatum	Weakly supported	Weakly supported	origin = eukaryotic, long branching recipient	1.57373	87.2	99.5	PEPTIDE CHAIN RELEASE FACTOR SUBUNIT 1	1	317	Directs the termination of nascent peptide synthesis (translation) in response to the termination codons UAA, UAG and UGA	0.322718	471	479	Unknown
COG003044	VtoE	133427	Protoceratium reticulatum	Weakly supported	Weakly supported	origin = eukaryotic, long branching recipient	2.83411	95.4	95.1	ISOCITRATE DEHYDROGENASE [NADP]	1	1	no annotation	0	0	90	Plastid
COG000048	VtoE	2608131	Prymnesiophyceae	10239	Viruses	origin = unkn	0.213496	96.8	86.5	RIBONUCLEOSIDE-DIPHOSPHATE REDUCTASE LARGE CHAIN	0.9955	2244	Provides the precursors necessary for DNA synthesis	0.506765	2439	2481	Mitochondrion
COG003115	VtoE	2608131	Prymnesiophyceae	10501	Phycodnaviridae	origin = unkn	0.196458	92.6	83.7	METHYLTRANSFERASE	0.9688	32	Methyltransferase domain	0.987179	78	86	Plastid
COG004568	VtoE	2608131	Prymnesiophyceae	10501	Phycodnaviridae	origin = virus	0.443887	98.9	root	GLYCOSYLTRANSFERASE-LIKE KOBITO 1	0.8889	9	spermidine synthase activity	0.925926	27	33	Nucleus
COG000203	VtoE	2608131	Prymnesiophyceae	455363	unclassified Phycodnaviridae	origin = eukaryotic	0.268597	82.5	80.7	MICROTUBULE-ASSOCIATED PROTEINS 1A/1B LIGHT CHAIN 3-RELATED	0.999	954	Belongs to the ATG8 family	0.387565	965	987	Cytoplasm
COG001340	VtoE	2608131	Prymnesiophyceae	455363	unclassified Phycodnaviridae	origin = unkn, cousin unclear	0.733258	83.1	84.3	BETA-1,3-GALACTOSYLTRANSFERASE 6	0.3333	3	negative regulation of septation initiation signaling	0.589109	202	246	Cytoplasm
COG000214	VtoE	2608131	Prymnesiophyceae	2732007	Nucleocytoviricota	origin = eukaryotic, cousin unclear	0.74093	94.4	98.4	DYNAMIN	0.9989	931	Belongs to the TRAFAC class dynamin-like GTPase superfamily	0.686047	946	956	Unknown
COG003368	VtoE	266149	Pseudocohnilembus persalinus	455363	unclassified Phycodnaviridae	origin = eukaryotic, cousin unclear	0.719674	83.7	99.2	OXOGLUTARATE/IRON-DEPENDENT DIOXYGENASE	1	66	peptidase inhibitor activity	0.692308	13	72	Nucleus
COG005323	VtoE	266149	Pseudocohnilembus persalinus	455363	unclassified Phycodnaviridae	origin = virus	0.917501	93.3	96.7	No annotation	0	0	no annotation	0	0	21	Cell_membrane
COG000298	VtoE	266149	Pseudocohnilembus persalinus	985780	unclassified Mimiviridae	origin = eukaryotic	0.488752	98.5	98.5	PROTEASE M3 THIMET OLIGOPEPTIDASE-RELATED	0.9367	616	Peptidase family M3	0.338101	769	776	Cytoplasm
COG000484	VtoE	266149	Pseudocohnilembus persalinus	1513234	Cafeteriavirus	origin = eukaryotic	0.678238	98.5	84.6	FATTY ACID DESATURASE 2	1	224	Fatty acid desaturase	0.389587	557	564	Endoplasmic_reticulum
COG007429	VtoE	266149	Pseudocohnilembus persalinus	2732523	Megaviricetes	origin = virus	1.5067	root	root	RING ZINC FINGER PROTEIN-RELATED	0.2857	7	ubiquitin-protein transferase activity	0.571429	7	8	Nucleus
COG002322	VtoE	266149	Pseudocohnilembus persalinus	Weakly supported	Weakly supported	origin = virus, long branching recipient	3.24121	97.1	root	TRANSCRIPTION TERMINATION FACTOR 2-RELATED	0.9078	141	N-methyltransferase activity	0.858156	141	148	Cytoplasm
COG007436	VtoE	266149	Pseudocohnilembus persalinus	Weakly supported	Weakly supported	origin = virus, sister unclear	1.51168	90.9	root	PTHR46563:SF2	0.3333	3	ubiquitin-protein transferase activity	1	1	8	Unknown
COG000162	VtoE	947166	Ramazzottius varieornatus	10239	Viruses	origin = eukaryotic, cousin unclear	1.18971	84.4	99.1	UBIQUITIN CARBOXYL-TERMINAL HYDROLASE	1	1081	Belongs to the peptidase C19 family	0.372835	1097	1116	Cytoplasm
COG007801	VtoE	947166	Ramazzottius varieornatus	10501	Phycodnaviridae	origin = virus	0.885263	root	root	E3 UBIQUITIN-PROTEIN LIGASE PRAJA	0.4286	7	cytoplasm protein quality control by the ubiquitin-proteasome system	0.285714	7	7	Nucleus
COG000358	VtoE	947166	Ramazzottius varieornatus	455363	unclassified Phycodnaviridae	origin = unkn	0.502467	88.2	90.1	DNA POLYMERASE III SUBUNIT EPSILON	0.9941	170	Exonuclease	0.488525	610	678	Unknown
COG000782	VtoE	947166	Ramazzottius varieornatus	2487763	Barrevirus sp.	origin = eukaryotic, cousin unclear	0.376761	84.8	98.3	OS06G0652100 PROTEIN	1	327	Domain of unknown function (DUF2828)	0.884021	388	393	Nucleus
COG000358	VtoE	947166	Ramazzottius varieornatus	2732007	Nucleocytoviricota	origin = unkn, cousin unclear	1.77358	83.7	92	DNA POLYMERASE III SUBUNIT EPSILON	0.9941	170	Exonuclease	0.488525	610	678	Unknown
COG000970	VtoE	947166	Ramazzottius varieornatus	2732007	Nucleocytoviricota	origin = eukaryotic	0.498573	94.1	93.1	UV-DAMAGE ENDONUCLEASE	1	178	UV-endonuclease UvdE	0.419453	329	335	Unknown
COG003057	VtoE	947166	Ramazzottius varieornatus	2732007	Nucleocytoviricota	origin = unkn, cousin unclear	0.202732	95.2	80.8	UNCHARACTERIZED	0.5	4	Expressed protein	0.844156	77	89	Golgi_apparatus
COG000068	VtoE	947166	Ramazzottius varieornatus	Weakly supported	Weakly supported	origin = unkn, long branching recipient	0.915909	92.1	86.3	RIBONUCLEOSIDE-DIPHOSPHATE REDUCTASE SMALL CHAIN	0.9972	1762	Ribonucleotide reductase, small chain	0.392931	1924	1961	Unknown
COG000232	VtoE	10116	Rattus norvegicus	Weakly supported	Weakly supported	origin = unkn, long branching recipient	1.3645	89.2	98.5	60 KDA HEAT SHOCK PROTEIN, MITOCHONDRIAL	0.9974	761	Belongs to the chaperonin (HSP60) family	0.433406	916	919	Unknown
COG000049	VtoE	46433	Reticulomyxa filosa	10239	Viruses	origin = eukaryotic, cousin unclear	0.791054	92.7	root	CASEIN KINASE-RELATED	0.9962	2357	protein kinase activity	0.174385	2397	2444	Nucleus
COG000113	VtoE	46433	Reticulomyxa filosa	455363	unclassified Phycodnaviridae	origin = eukaryotic	1.43274	93.3	80.4	UBIQUITIN	0.9609	1279	ubiquitin	0.414104	1333	1402	Unknown
COG000602	VtoE	46433	Reticulomyxa filosa	455363	unclassified Phycodnaviridae	origin = eukaryotic	0.735982	91.5	82	SUPERFAMILY HYDROLASE, PUTATIVE (AFU_ORTHOLOGUE AFUA_1G03035)-RELATED	0.9913	115	Metal dependent phosphohydrolases with conserved 'HD' motif	0.538302	483	486	Nucleus
COG001251	VtoE	46433	Reticulomyxa filosa	455363	unclassified Phycodnaviridae	origin = unkn	0.916339	91.6	85.9	GH17980P-RELATED	0.9823	113	Aldo/keto reductase family	0.501916	261	262	Cytoplasm
COG000245	VtoE	46433	Reticulomyxa filosa	1977640	Klosneuvirus KNV1	origin = eukaryotic, cousin unclear	0.841818	83.9	91.7	METHIONYL-TRNA SYNTHETASE	0.5899	456	Is required not only for elongation of protein synthesis but also for the initiation of all mRNA translation through initiator tRNA(fMet) aminoacylation	0.461712	888	889	Cytoplasm
COG000014	VtoE	46433	Reticulomyxa filosa	2732007	Nucleocytoviricota	origin = prokaryotic, cousin unclear	0.439024	90.2	84.7	DNAJ HOMOLOG SUBFAMILY C MEMBER	0.3541	3253	ATP binding to DnaK triggers the release of the substrate protein, thus completing the reaction cycle	0.315643	5747	5826	Nucleus
COG000068	VtoE	46433	Reticulomyxa filosa	2732007	Nucleocytoviricota	origin = unkn	0.300419	95.2	97.1	RIBONUCLEOSIDE-DIPHOSPHATE REDUCTASE SMALL CHAIN	0.9972	1762	Ribonucleotide reductase, small chain	0.392931	1924	1961	Unknown
COG000098	VtoE	46433	Reticulomyxa filosa	2732007	Nucleocytoviricota	origin = eukaryotic	1.20244	92.1	88.9	DUAL SPECIFICITY PROTEIN PHOSPHATASE	0.3823	1512	Dual specificity phosphatase, catalytic domain	0.230013	1526	1556	Cytoplasm
COG000116	VtoE	46433	Reticulomyxa filosa	2732007	Nucleocytoviricota	origin = eukaryotic	0.120768	94	90.2	TRANSLATION FACTOR	0.9949	1180	regulation of response to stimulus	0.737885	1362	1385	Mitochondrion
COG000024	VtoE	46433	Reticulomyxa filosa	Weakly supported	Weakly supported	origin = unkn, long branching recipient	1.60422	96.1	85.6	DNA-DIRECTED RNA POLYMERASE I SUBUNIT 2	0.9997	3308	DNA-dependent RNA polymerase catalyzes the transcription of DNA into RNA using the four ribonucleoside triphosphates as substrates	0.58331	3511	3673	Unknown
COG000068	VtoE	46433	Reticulomyxa filosa	Weakly supported	Weakly supported	origin = unkn, long branching recipient	0.608364	86.8	84.1	RIBONUCLEOSIDE-DIPHOSPHATE REDUCTASE SMALL CHAIN	0.9972	1762	Ribonucleotide reductase, small chain	0.392931	1924	1961	Unknown
COG000301	VtoE	46433	Reticulomyxa filosa	Weakly supported	Weakly supported	origin = eukaryotic, long branching recipient	1.76037	92.6	95.1	LON PROTEASE	0.6405	484	ATP-dependent serine protease that mediates the selective degradation of mutant and abnormal proteins as well as certain short-lived regulatory proteins	0.383508	764	772	Unknown
COG002895	VtoE	46433	Reticulomyxa filosa	Weakly supported	Weakly supported	origin = virus, long branching recipient	2.36604	95.1	root	GLYCOGENIN SUBFAMILY MEMBER	1	98	transferase activity, transferring glycosyl groups	0.836735	98	100	Unknown
COG002895	VtoE	46433	Reticulomyxa filosa	Weakly supported	Weakly supported	origin = virus, long branching recipient	1.41756	95.1	root	GLYCOGENIN SUBFAMILY MEMBER	1	98	transferase activity, transferring glycosyl groups	0.836735	98	100	Unknown
COG003875	VtoE	46433	Reticulomyxa filosa	Weakly supported	Weakly supported	origin = eukaryotic, long branching recipient	2.56473	81.9	92.2	SCP160	0.9	50	Sterile alpha motif	0.3125	48	51	Nucleus
COG004266	VtoE	46433	Reticulomyxa filosa	Weakly supported	Weakly supported	origin = virus, long branching recipient	2.67467	95.7	86.3	DEOXYNUCLEOSIDE KINASE	1	39	Deoxynucleoside kinase	1	38	40	Unknown
COG005335	VtoE	46433	Reticulomyxa filosa	Weakly supported	Weakly supported	origin = virus, long branching recipient	9.69368	99.9	93.7	TRANSCRIPTION TERMINATION FACTOR 2-RELATED	1	20	N-methyltransferase activity	0.95	20	20	Unknown
COG000010	VtoE	259920	Rhincodon typus	11950	Rous-associated virus type 1	origin = eukaryotic, cousin unclear	0.0270681	90.8	98	SERINE/THREONINE-PROTEIN KINASE TNNI3K-RELATED	0.2795	7095	protein kinase activity	0.145963	7221	7300	Mitochondrion
COG003614	VtoE	543769	Rhizaria	985780	unclassified Mimiviridae	origin = unkn, cousin unclear	0.580109	99.5	99.9	DNA ANNEALING HELICASE AND ENDONUCLEASE ZRANB3 FAMILY MEMBER	0.8	30	Psort location Cytoplasmic, score 8	0.681818	22	61	Nucleus
COG000113	VtoE	588596	Rhizophagus irregularis	10239	Viruses	origin = eukaryotic, cousin unclear	0.512152	87.1	90	UBIQUITIN	0.9609	1279	ubiquitin	0.414104	1333	1402	Mitochondrion
COG003166	VtoE	588596	Rhizophagus irregularis	10239	Viruses	origin = virus	1.47566	93.9	84.2	No annotation	0	0	no annotation	0	0	83	Nucleus
COG003176	VtoE	588596	Rhizophagus irregularis	137992	Asfarviridae	origin = eukaryotic	0.215703	98.6	97.4	DNA POLYMERASE CATALYTIC SUBUNIT	1	57	DNA polymerase	0.392405	79	82	Mitochondrion
COG000113	VtoE	588596	Rhizophagus irregularis	455363	unclassified Phycodnaviridae	origin = eukaryotic, cousin unclear	0.11953	80.1	86	UBIQUITIN	0.9609	1279	ubiquitin	0.414104	1333	1402	Nucleus
COG000549	VtoE	588596	Rhizophagus irregularis	549779	Mimiviridae	origin = eukaryotic	0.98499	98.5	92.9	BCS1 AAA-TYPE ATPASE	0.9869	459	Belongs to the AAA ATPase family	0.298387	496	516	Unknown
COG000353	VtoE	588596	Rhizophagus irregularis	2023057	Orpheovirus IHUMI-LCC2	origin = unkn	0.875016	97.2	99.8	OXIDASE/PEROXIDASE	0.9836	610	Animal haem peroxidase	0.452276	681	687	Extracellular
COG000272	VtoE	588596	Rhizophagus irregularis	2732523	Megaviricetes	origin = unkn	0.887356	94.9	84.6	FLAP ENDONUCLEASE FAMILY MEMBER	0.9927	546	Structure-specific nuclease with 5'-flap endonuclease and 5'-3' exonuclease activities involved in DNA replication and repair	0.751225	816	826	Mitochondrion
COG000639	VtoE	588596	Rhizophagus irregularis	2732523	Megaviricetes	origin = unkn	0.842361	86.2	86.2	ZINC FINGER CCHC DOMAIN CONTAINING PROTEIN	0.7778	18	zinc finger	0.854881	379	461	Unknown
COG000019	VtoE	588596	Rhizophagus irregularis	Weakly supported	Weakly supported	origin = eukaryotic, long branching recipient	1.61099	83.2	95.4	HEAT SHOCK PROTEIN 70KDA	0.8288	3895	Belongs to the heat shock protein 70 family	0.27064	4530	4585	Unknown
COG000747	VtoE	588596	Rhizophagus irregularis	Weakly supported	Weakly supported	origin = prokaryotic, long branching recipient	2.47305	84.4	85.8	DEOXYNUCLEOSIDE KINASE	0.9859	71	Deoxynucleoside kinase	0.404938	405	405	Unknown
COG002608	VtoE	588596	Rhizophagus irregularis	Weakly supported	Weakly supported	origin = virus, long branching recipient	2.80406	86.2	root	BETA1,3-GALACTOSYLTRANSFERASE	0.9	20	Glycosyltransferase that generates the core 1 O-glycan Gal-beta1-3GalNAc-alpha1-Ser Thr (T antigen), which is a precursor for many extended O-glycans in glycoproteins	0.333333	18	123	Unknown
COG007253	VtoE	588596	Rhizophagus irregularis	Weakly supported	Weakly supported	origin = virus, sister unclear	1.24219	85.9	root	3-5 EXONUCLEASE	1	6	3'-5' exonuclease	0.571429	7	9	Cytoplasm
COG000113	VtoE	246409	Rhizopus delemar RA 99-880	1586712	Yellowstone lake mimivirus	origin = eukaryotic, cousin unclear	2.5234e-06	88.8	83.9	UBIQUITIN	0.9609	1279	ubiquitin	0.414104	1333	1402	Nucleus
COG000331	VtoE	246409	Rhizopus delemar RA 99-880	Weakly supported	Weakly supported	origin = eukaryotic, long branching recipient	1.31246	93.1	86.1	TRANSPOSASE	1	1	Spizellomyces punctatus DAOM BR117	0.979866	447	717	Nucleus
COG000043	VtoE	71275	rosids	10239	Viruses	origin = unkn	0.601246	81.1	84.5	THYMIDYLATE SYNTHASE 1	0.701	2381	Thymidylate synthase	0.35328	2607	2647	Mitochondrion
COG002014	VtoE	988480	Rozella allomycis CSF55	455363	unclassified Phycodnaviridae	origin = unkn, cousin unclear	1.34847	91.2	root	MANNOSYL PHOSPHORYLINOSITOL CERAMIDE SYNTHASE	0.9744	39	Capsular polysaccharide synthesis protein	0.987261	157	164	Unknown
COG003831	VtoE	988480	Rozella allomycis CSF55	455363	unclassified Phycodnaviridae	origin = prokaryotic	2.64198	85.8	83.2	PROTEIN MONO-ADP-RIBOSYLTRANSFERASE PARP4	1	1	RNA ligase	0.86	50	53	Mitochondrion
COG000741	VtoE	988480	Rozella allomycis CSF55	549779	Mimiviridae	origin = eukaryotic	0.836036	86.2	93	BIFUNCTIONAL POLYNUCLEOTIDE PHOSPHATASE/KINASE	0.9975	395	Polynucleotide kinase 3 phosphatase	0.383459	399	407	Nucleus
COG000367	VtoE	988480	Rozella allomycis CSF55	2732007	Nucleocytoviricota	origin = unkn	0.840571	93.7	90.4	ALPHA/BETA-HYDROLASES SUPERFAMILY PROTEIN	0.9199	537	Lipase (class 3)	0.37156	654	667	Extracellular
COG000741	VtoE	559292	Saccharomyces cerevisiae S288C	2732555	Pimascovirales	origin = eukaryotic	0.763047	98.4	83.1	BIFUNCTIONAL POLYNUCLEOTIDE PHOSPHATASE/KINASE	0.9975	395	Polynucleotide kinase 3 phosphatase	0.383459	399	407	Cytoplasm
COG000482	VtoE	4892	Saccharomycetales	10239	Viruses	origin = unkn	0.199732	95.8	90	RIBONUCLEASE H1	0.9981	530	Endonuclease that specifically degrades the RNA of RNA- DNA hybrids	0.539162	549	565	Nucleus
COG000005	VtoE	4892	Saccharomycetales	10501	Phycodnaviridae	origin = eukaryotic, cousin unclear	0.882086	83.8	87.7	DRAB5-RELATED	0.2327	10584	Rab subfamily of small GTPases	0.149102	10798	10903	Nucleus
COG000014	VtoE	4892	Saccharomycetales	2732007	Nucleocytoviricota	origin = prokaryotic, cousin unclear	0.22234	90.2	84.7	DNAJ HOMOLOG SUBFAMILY C MEMBER	0.3541	3253	ATP binding to DnaK triggers the release of the substrate protein, thus completing the reaction cycle	0.315643	5747	5826	Cytoplasm
COG000114	VtoE	4892	Saccharomycetales	Weakly supported	Weakly supported	origin = prokaryotic, long branching recipient	1.48917	84.1	80.6	RIBONUCLEASE III	0.5405	840	rRNA catabolic process	0.737232	1351	1392	Nucleus
COG000162	VtoE	8030	Salmo salar	549779	Mimiviridae	origin = eukaryotic	0.656041	98.4	97.7	UBIQUITIN CARBOXYL-TERMINAL HYDROLASE	1	1081	Belongs to the peptidase C19 family	0.372835	1097	1116	Nucleus
COG004795	VtoE	946362	Salpingoeca rosetta	10239	Viruses	origin = eukaryotic	0.811004	88.8	84.6	RNI-LIKE SUPERFAMILY PROTEIN	1	1	negative regulation of interferon-alpha production	1	7	29	Unknown
COG003831	VtoE	946362	Salpingoeca rosetta	346673	Coccolithovirus	origin = unkn	1.06969	90.1	91.8	PROTEIN MONO-ADP-RIBOSYLTRANSFERASE PARP4	1	1	RNA ligase	0.86	50	53	Nucleus
COG005168	VtoE	946362	Salpingoeca rosetta	346673	Coccolithovirus	origin = unkn	1.57722	91	97.6	No annotation	0	0	no annotation	0	0	23	Nucleus
COG004994	VtoE	946362	Salpingoeca rosetta	2732007	Nucleocytoviricota	origin = unkn	5.58149	83.2	98.4	KREMEN PROTEIN	0.5	2	Domain of unknown function (DUF4842)	0.375	8	25	Cell_membrane
COG003419	VtoE	946362	Salpingoeca rosetta	2732523	Megaviricetes	origin = eukaryotic	1.69331	97.6	root	MANNOSYL PHOSPHORYLINOSITOL CERAMIDE SYNTHASE	0.9844	64	Glycosyltransferase sugar-binding region containing DXD motif	0.446154	65	69	Golgi_apparatus
COG007217	VtoE	946362	Salpingoeca rosetta	2732523	Megaviricetes	origin = virus	0.647891	99.8	root	PHYTANOYL-COA DIOXYGENASE-RELATED-RELATED	0.8889	9	Phytanoyl-CoA dioxygenase (PhyH)	0.888889	9	9	Nucleus
COG000419	VtoE	946362	Salpingoeca rosetta	Weakly supported	Weakly supported	origin = eukaryotic, long branching recipient	3.18768	83.5	88.1	CYSTEINYL-TRNA SYNTHETASE	0.991	443	Belongs to the class-I aminoacyl-tRNA synthetase family	0.245902	610	617	Cytoplasm
COG004051	VtoE	946362	Salpingoeca rosetta	Weakly supported	Weakly supported	origin = virus, long branching recipient	2.30453	root	root	MRNA GUANINE-7- METHYLTRANSFERASE	1	44	Belongs to the class I-like SAM-binding methyltransferase superfamily	0.627907	43	45	Nucleus
COG004074	VtoE	946362	Salpingoeca rosetta	Weakly supported	Weakly supported	origin = virus, long branching recipient	9.03634	96.4	root	No annotation	0	0	no annotation	0	0	45	Unknown
COG000827	VtoE	81529	Salpingoecidae	10239	Viruses	origin = unkn	0.321003	99.8	93.8	VITAMIN B12-DEPENDENT RIBONUCLEOTIDE REDUCTASE	1	222	ribonucleoside-diphosphate reductase activity	0.338667	375	375	Mitochondrion
COG001039	VtoE	81529	Salpingoecidae	2732007	Nucleocytoviricota	origin = unkn	0.117455	99.4	92.7	PTHR46091	0.9799	149	Flavin containing amine oxidoreductase	0.332258	310	312	Endoplasmic_reticulum
COG001039	VtoE	695850	Saprolegnia parasitica CBS 223.65	455363	unclassified Phycodnaviridae	origin = eukaryotic	0.903123	89.7	82.2	PTHR46091	0.9799	149	Flavin containing amine oxidoreductase	0.332258	310	312	Endoplasmic_reticulum
COG005462	VtoE	695850	Saprolegnia parasitica CBS 223.65	Weakly supported	Weakly supported	origin = virus, sister unclear	1.01718	93.2	94.4	FLOTILLIN-RELATED	1	19	protein localization to membrane raft	0.631579	19	19	Mitochondrion
COG000702	VtoE	4764	Saprolegniaceae	985780	unclassified Mimiviridae	origin = eukaryotic	0.598311	91.9	85.8	RNA-SPLICING LIGASE RTCB	0.9427	192	tRNA-splicing ligase RtcB	0.562061	427	428	Peroxisome
COG000491	VtoE	2698737	Sar	10239	Viruses	origin = virus, cousin unclear	0.242642	86.9	95.1	WASP INTERACTING PROTEIN-RELATED	0.3333	3	ATP-dependent DNA helicase activity	0.998095	525	559	Cytoplasm
COG005285	VtoE	2698737	Sar	10239	Viruses	origin = virus	0.35804	85.7	81.8	METHYLTRANSFERASE	1	7	Methyltransferase domain	0.888889	18	21	Plastid
COG000116	VtoE	2698737	Sar	10501	Phycodnaviridae	origin = eukaryotic	0.168543	93.9	95.6	TRANSLATION FACTOR	0.9949	1180	regulation of response to stimulus	0.737885	1362	1385	Cytoplasm
COG000463	VtoE	2698737	Sar	10699	Siphoviridae	origin = unkn, cousin unclear	0.547057	91.6	86.7	ATP-DEPENDENT HELICASE IRC3-RELATED	0.639	313	helicase activity	0.25	576	579	Nucleus
COG004155	VtoE	2698737	Sar	28883	Caudovirales	origin = unkn	0.39835	90.6	80.2	UVRD / RECB / PCRA DNA HELICASE FAMILY MEMBER	1	18	UvrD-like helicase C-terminal domain	0.380952	42	42	Nucleus
COG002824	VtoE	2698737	Sar	1910954	Sinsheimervirus	origin = virus	0.003127	85.6	87.6	No annotation	0	0	Microvirus H protein (pilot protein)	1	103	105	Mitochondrion
COG000014	VtoE	2698737	Sar	2732007	Nucleocytoviricota	origin = eukaryotic, cousin unclear	0.942449	100	92	DNAJ HOMOLOG SUBFAMILY C MEMBER	0.3541	3253	ATP binding to DnaK triggers the release of the substrate protein, thus completing the reaction cycle	0.315643	5747	5826	Nucleus
COG000136	VtoE	2698737	Sar	2732007	Nucleocytoviricota	origin = eukaryotic, cousin unclear	0.392687	100	83	ZINC METALLOPROTEASE FAMILY M13 NEPRILYSIN-RELATED	0.999	1028	metalloendopeptidase activity	0.288192	1211	1238	Cytoplasm
COG002311	VtoE	2698737	Sar	2732007	Nucleocytoviricota	origin = virus	0.244214	93.4	root	PROCOLLAGEN-LYSINE,2-OXOGLUTARATE 5-DIOXYGENASE/GLYCOSYLTRANSFERASE 25 FAMILY MEMBER	1	48	Glycosyltransferase family 25 (LPS biosynthesis protein)	0.259259	135	149	Nucleus
COG000068	VtoE	2698737	Sar	Weakly supported	Weakly supported	origin = unkn, long branching recipient	0.992462	95.8	88.1	RIBONUCLEOSIDE-DIPHOSPHATE REDUCTASE SMALL CHAIN	0.9972	1762	Ribonucleotide reductase, small chain	0.392931	1924	1961	Cytoplasm
COG002368	VtoE	9305	Sarcophilus harrisii	Weakly supported	Weakly supported	origin = eukaryotic, long branching recipient	1.71875	84.2	88.5	PTHR40389	0.9412	136	gag gene protein p24 (core nucleocapsid protein)	0.576	125	145	Extracellular
COG002368	VtoE	9305	Sarcophilus harrisii	Weakly supported	Weakly supported	origin = eukaryotic, long branching donor	0.19696	97.4	87	PTHR40389	0.9412	136	gag gene protein p24 (core nucleocapsid protein)	0.576	125	145	Mitochondrion
COG003034	VtoE	9305	Sarcophilus harrisii	Weakly supported	Weakly supported	origin = eukaryotic, long branching recipient	0.564898	98.5	root	VIRAL ENVELOPE PROTEIN	1	69	syncytium formation by plasma membrane fusion	0.644444	90	90	Unknown
COG001454	VtoE	8287	Sarcopterygii	2017756	Alphairidovirinae	origin = eukaryotic	0.119118	91.9	98.7	NAD DEPENDENT EPIMERASE/DEHYDRATASE	0.9954	217	steroid biosynthetic process	0.597345	226	226	Peroxisome
COG000144	VtoE	6183	Schistosoma mansoni	549779	Mimiviridae	origin = unkn	1.44257	94.5	87.7	PROTEASE M1 ZINC METALLOPROTEASE	0.999	994	metalloaminopeptidase activity	0.340734	1171	1194	Cytoplasm
COG007539	VtoE	88036	Selaginella moellendorffii	Weakly supported	Weakly supported	origin = virus, sister unclear	2.1746	82.6	root	E3 UBIQUITIN-PROTEIN LIGASE TOPORS	1	5	ligase activity	0.666667	6	8	Unknown
COG005776	VtoE	4081	Solanum lycopersicum	10239	Viruses	origin = eukaryotic	2.39144	85.8	root	PHD AND RING FINGER DOMAIN-CONTAINING PROTEIN 1	0.625	8	acid-amino acid ligase activity	0.857143	14	16	Nucleus
COG008884	VtoE	4081	Solanum lycopersicum	2732007	Nucleocytoviricota	origin = virus	5.28979	84.4	root	SI:CH211-59O9.10	0.5	4	ubiquitin-like protein ligase activity	0.666667	3	5	Unknown
COG000014	VtoE	4081	Solanum lycopersicum	Weakly supported	Weakly supported	origin = eukaryotic, long branching recipient	1.21694	84	92	DNAJ HOMOLOG SUBFAMILY C MEMBER	0.3541	3253	ATP binding to DnaK triggers the release of the substrate protein, thus completing the reaction cycle	0.315643	5747	5826	Unknown
COG000069	VtoE	4081	Solanum lycopersicum	Weakly supported	Weakly supported	origin = virus, long branching recipient	0.519836	85.7	88.3	ENZYMATIC POLYPROTEIN-RELATED	0.9934	1372	polyprotein	0.647557	1535	1954	Nucleus
COG000069	VtoE	4081	Solanum lycopersicum	Weakly supported	Weakly supported	origin = virus, sister unclear	0.106384	91.8	100	ENZYMATIC POLYPROTEIN-RELATED	0.9934	1372	polyprotein	0.647557	1535	1954	Mitochondrion
COG000235	VtoE	4081	Solanum lycopersicum	Weakly supported	Weakly supported	origin = virus, long branching recipient	0.200939	root	root	PHOTOSYSTEM II PROTEIN D1	1	844	Photosystem II (PSII) is a light-driven water plastoquinone oxidoreductase that uses light energy to abstract electrons from H(2)O, generating O(2) and a proton gradient subsequently used for ATP formation	0.519651	916	916	Mitochondrion
COG000235	VtoE	4081	Solanum lycopersicum	Weakly supported	Weakly supported	origin = virus, long branching recipient	0.0599128	root	root	PHOTOSYSTEM II PROTEIN D1	1	844	Photosystem II (PSII) is a light-driven water plastoquinone oxidoreductase that uses light energy to abstract electrons from H(2)O, generating O(2) and a proton gradient subsequently used for ATP formation	0.519651	916	916	Unknown
COG000235	VtoE	4081	Solanum lycopersicum	Weakly supported	Weakly supported	origin = virus, long branching recipient	0.30499	root	root	PHOTOSYSTEM II PROTEIN D1	1	844	Photosystem II (PSII) is a light-driven water plastoquinone oxidoreductase that uses light energy to abstract electrons from H(2)O, generating O(2) and a proton gradient subsequently used for ATP formation	0.519651	916	916	Unknown
COG000235	VtoE	4081	Solanum lycopersicum	Weakly supported	Weakly supported	origin = virus, long branching recipient	0.114731	root	root	PHOTOSYSTEM II PROTEIN D1	1	844	Photosystem II (PSII) is a light-driven water plastoquinone oxidoreductase that uses light energy to abstract electrons from H(2)O, generating O(2) and a proton gradient subsequently used for ATP formation	0.519651	916	916	Unknown
COG000235	VtoE	4081	Solanum lycopersicum	Weakly supported	Weakly supported	origin = virus, long branching recipient	0.401168	root	root	PHOTOSYSTEM II PROTEIN D1	1	844	Photosystem II (PSII) is a light-driven water plastoquinone oxidoreductase that uses light energy to abstract electrons from H(2)O, generating O(2) and a proton gradient subsequently used for ATP formation	0.519651	916	916	Mitochondrion
COG000235	VtoE	4081	Solanum lycopersicum	Weakly supported	Weakly supported	origin = virus, long branching recipient	1.15313	root	root	PHOTOSYSTEM II PROTEIN D1	1	844	Photosystem II (PSII) is a light-driven water plastoquinone oxidoreductase that uses light energy to abstract electrons from H(2)O, generating O(2) and a proton gradient subsequently used for ATP formation	0.519651	916	916	Mitochondrion
COG000491	VtoE	667725	Sphaeroforma arctica JP610	10239	Viruses	origin = prokaryotic	0.846578	93.1	89.8	WASP INTERACTING PROTEIN-RELATED	0.3333	3	ATP-dependent DNA helicase activity	0.998095	525	559	Unknown
COG000845	VtoE	667725	Sphaeroforma arctica JP610	10239	Viruses	origin = virus, cousin unclear	0.997747	95.1	87.6	PTHR47810	0.9944	355	DNA ligase (ATP) activity	0.924119	369	371	Cytoplasm
COG001278	VtoE	667725	Sphaeroforma arctica JP610	10239	Viruses	origin = virus	1.14455	root	root	UVRD / RECB / PCRA DNA HELICASE FAMILY MEMBER	1	221	UvrD/REP helicase N-terminal domain	0.62069	29	257	Unknown
COG004759	VtoE	667725	Sphaeroforma arctica JP610	10501	Phycodnaviridae	origin = virus	1.00328	91.3	root	No annotation	0	0	no annotation	0	0	29	Endoplasmic_reticulum
COG000299	VtoE	667725	Sphaeroforma arctica JP610	455363	unclassified Phycodnaviridae	origin = eukaryotic	1.09522	99	99.4	TRANSCRIPTION TERMINATION FACTOR 2-RELATED	0.992	749	SNF2 family N-terminal domain	0.203922	765	775	Cytoplasm
COG001647	VtoE	667725	Sphaeroforma arctica JP610	549779	Mimiviridae	origin = eukaryotic	0.577934	97.9	80.6	PTHR46504	1	125	Beta-lactamase superfamily domain	0.5	188	200	Unknown
COG001340	VtoE	667725	Sphaeroforma arctica JP610	2732007	Nucleocytoviricota	origin = eukaryotic	0.439031	90.8	96.9	BETA-1,3-GALACTOSYLTRANSFERASE 6	0.3333	3	negative regulation of septation initiation signaling	0.589109	202	246	Endoplasmic_reticulum
COG005469	VtoE	667725	Sphaeroforma arctica JP610	2732007	Nucleocytoviricota	origin = prokaryotic	1.5928	91.7	root	No annotation	0	0	SET (Su(var)3-9, Enhancer-of-zeste, Trithorax) domain	1	12	19	Nucleus
COG005810	VtoE	667725	Sphaeroforma arctica JP610	2732007	Nucleocytoviricota	origin = virus	3.48338	89.6	root	MANNOSYL PHOSPHORYLINOSITOL CERAMIDE SYNTHASE	1	1	Glycosyl transferases group 1	0.8	5	16	Endoplasmic_reticulum
COG000357	VtoE	667725	Sphaeroforma arctica JP610	2732523	Megaviricetes	origin = unkn	0.516622	97.8	92.5	HISTONE ACETYLTRANSFERASE-RELATED	1	517	radical SAM domain protein	0.355224	670	682	Endoplasmic_reticulum
COG000024	VtoE	667725	Sphaeroforma arctica JP610	Weakly supported	Weakly supported	origin = eukaryotic, long branching recipient	1.24691	100	91.8	DNA-DIRECTED RNA POLYMERASE I SUBUNIT 2	0.9997	3308	DNA-dependent RNA polymerase catalyzes the transcription of DNA into RNA using the four ribonucleoside triphosphates as substrates	0.58331	3511	3673	Cytoplasm
COG000040	VtoE	667725	Sphaeroforma arctica JP610	Weakly supported	Weakly supported	origin = unkn, long branching recipient	2.5516	91.1	99.6	TWO-COMPONENT HISTIDINE KINASE	0.4898	1374	PhoQ Sensor	0.307939	2809	2838	Cytoplasm
COG000045	VtoE	667725	Sphaeroforma arctica JP610	Weakly supported	Weakly supported	origin = unkn, long branching recipient	1.47128	81	97.4	DNA POLYMERASE CATALYTIC SUBUNIT	0.9057	2090	3'-5' exonuclease activity	0.66927	2561	2589	Unknown
COG000045	VtoE	667725	Sphaeroforma arctica JP610	Weakly supported	Weakly supported	origin = unkn, long branching donor	0.562098	96	88.9	DNA POLYMERASE CATALYTIC SUBUNIT	0.9057	2090	3'-5' exonuclease activity	0.66927	2561	2589	Mitochondrion
COG000095	VtoE	667725	Sphaeroforma arctica JP610	Weakly supported	Weakly supported	origin = virus, long branching recipient	4.0224	98	82.6	DNA POLYMERASE CATALYTIC SUBUNIT	1	1438	DNA polymerase family B	0.952317	1489	1582	Mitochondrion
COG000101	VtoE	667725	Sphaeroforma arctica JP610	Weakly supported	Weakly supported	origin = virus, long branching recipient	1.91003	86.4	83.5	PHOSPHORYN, PUTATIVE-RELATED-RELATED	1	1	adenyl ribonucleotide binding	0.989933	1490	1535	Cytoplasm
COG001324	VtoE	667725	Sphaeroforma arctica JP610	Weakly supported	Weakly supported	origin = virus, long branching recipient	2.3253	89	95.2	No annotation	0	0	Large eukaryotic DNA virus major capsid protein	1	246	249	Unknown
COG005925	VtoE	667725	Sphaeroforma arctica JP610	Weakly supported	Weakly supported	origin = virus, long branching recipient	2.37422	100	root	CYCLINS	1	15	Cyclin, N-terminal domain	0.933333	15	15	Plastid
COG000387	VtoE	348837	Spironucleus salmonicida	455363	unclassified Phycodnaviridae	origin = prokaryotic	1.41254	82.8	87.8	DNA-DIRECTED RNA POLYMERASES I, II, AND III SUBUNIT RPABC1	0.9977	426	DNA-dependent RNA polymerase catalyzes the transcription of DNA into RNA using the four ribonucleoside triphosphates as substrates	0.3312	625	639	Unknown
COG000488	VtoE	348837	Spironucleus salmonicida	Weakly supported	Weakly supported	origin = eukaryotic, long branching recipient	1.04823	94.4	90.9	EUKARYOTIC TRANSLATION INITIATION FACTOR	1	273	translation initiation factor activity	0.919643	560	562	Unknown
COG000597	VtoE	645134	Spizellomyces punctatus DAOM BR117	2094720	Tupanvirus	origin = unkn	0.709129	97.3	91.4	OS03G0233200 PROTEIN	0.9465	467	Thaumatin family	0.464876	484	487	Extracellular
COG004752	VtoE	645134	Spizellomyces punctatus DAOM BR117	2732005	Bamfordvirae	origin = virus	1.93661	89.5	99.8	ATP BINDING PROTEIN-RELATED	1	1	Virulence-associated protein E	0.6	25	29	Unknown
COG005649	VtoE	645134	Spizellomyces punctatus DAOM BR117	2732005	Bamfordvirae	origin = virus	1.85654	95	95.3	ATP BINDING PROTEIN-RELATED	1	12	Virulence-associated protein E	0.8125	16	17	Nucleus
COG001518	VtoE	645134	Spizellomyces punctatus DAOM BR117	2732007	Nucleocytoviricota	origin = prokaryotic	0.607508	92.3	92.4	UDP-N-ACETYL-D-MANNOSAMINE DEHYDROGENASE	1	44	Belongs to the UDP-glucose GDP-mannose dehydrogenase family	0.590698	215	215	Cytoplasm
COG003780	VtoE	645134	Spizellomyces punctatus DAOM BR117	2732007	Nucleocytoviricota	origin = eukaryotic	1.92165	80.3	97.3	STEROL DESATURASE	1	52	Fatty acid hydroxylase superfamily	0.961538	52	55	Endoplasmic_reticulum
COG004151	VtoE	645134	Spizellomyces punctatus DAOM BR117	2732523	Megaviricetes	origin = unkn	1.36478	84.1	root	D123 PROTEIN	1	2	D123	0.666667	6	43	Cytoplasm
COG000087	VtoE	645134	Spizellomyces punctatus DAOM BR117	Weakly supported	Weakly supported	origin = virus, long branching recipient	3.24098	93.8	90.6	ATP BINDING PROTEIN-RELATED	0.9993	1453	D5 N terminal like	0.970588	1530	1632	Nucleus
COG000162	VtoE	5963	Stentor coeruleus	549779	Mimiviridae	origin = eukaryotic, cousin unclear	1.30579	87.5	92.8	UBIQUITIN CARBOXYL-TERMINAL HYDROLASE	1	1081	Belongs to the peptidase C19 family	0.372835	1097	1116	Cytoplasm
COG002880	VtoE	5963	Stentor coeruleus	2506600	Pithovirus LCDPAC01	origin = virus	2.6968	94.5	87.3	MRNA GUANINE-7- METHYLTRANSFERASE	0.4861	72	mRNA capping enzyme	0.559322	59	101	Nucleus
COG000113	VtoE	5963	Stentor coeruleus	2732007	Nucleocytoviricota	origin = eukaryotic, cousin unclear	0.360733	86.9	81	UBIQUITIN	0.9609	1279	ubiquitin	0.414104	1333	1402	Cytoplasm
COG000113	VtoE	5963	Stentor coeruleus	2732007	Nucleocytoviricota	origin = eukaryotic, cousin unclear	0.439616	84.9	88.8	UBIQUITIN	0.9609	1279	ubiquitin	0.414104	1333	1402	Cytoplasm
COG000421	VtoE	5963	Stentor coeruleus	2732007	Nucleocytoviricota	origin = eukaryotic	0.277433	80.1	93.1	AN1-TYPE ZINC FINGER PROTEIN	0.9889	542	AN1-like Zinc finger	0.163904	543	616	Nucleus
COG002506	VtoE	5963	Stentor coeruleus	2732007	Nucleocytoviricota	origin = eukaryotic	2.12541	root	root	E3 UBIQUITIN-PROTEIN LIGASE RNF165	0.6535	127	Ring finger domain	0.19685	127	133	Nucleus
COG000639	VtoE	5963	Stentor coeruleus	2732523	Megaviricetes	origin = unkn	1.45175	80.7	86.2	ZINC FINGER CCHC DOMAIN CONTAINING PROTEIN	0.7778	18	zinc finger	0.854881	379	461	Unknown
COG000030	VtoE	5963	Stentor coeruleus	Weakly supported	Weakly supported	origin = eukaryotic, long branching recipient	0.766959	83.1	89.4	UBIQUITIN-CONJUGATING ENZYME E2	0.9944	3206	protein modification by small protein conjugation	0.406107	3275	3304	Unknown
COG000162	VtoE	5963	Stentor coeruleus	Weakly supported	Weakly supported	origin = eukaryotic, long branching recipient	1.35374	88.2	82.4	UBIQUITIN CARBOXYL-TERMINAL HYDROLASE	1	1081	Belongs to the peptidase C19 family	0.372835	1097	1116	Cytoplasm
COG000203	VtoE	5963	Stentor coeruleus	Weakly supported	Weakly supported	origin = unkn, long branching recipient	1.59705	92.8	82.5	MICROTUBULE-ASSOCIATED PROTEINS 1A/1B LIGHT CHAIN 3-RELATED	0.999	954	Belongs to the ATG8 family	0.387565	965	987	Unknown
COG000493	VtoE	5963	Stentor coeruleus	Weakly supported	Weakly supported	origin = eukaryotic, long branching recipient	1.20796	97.1	81.1	PROLIFERATING CELL NUCLEAR ANTIGEN	1	376	This protein is an auxiliary protein of DNA polymerase delta and is involved in the control of eukaryotic DNA replication by increasing the polymerase's processibility during elongation of the leading strand	0.427536	552	558	Cytoplasm
COG000860	VtoE	33634	Stramenopiles	10239	Viruses	origin = eukaryotic, cousin unclear	0.192018	84.7	91.9	EUKARYOTIC TRANSLATION INITIATION FACTOR SUI1	0.9944	355	Translation initiation factor SUI1	0.269231	364	365	Cytoplasm
COG000810	VtoE	33634	Stramenopiles	2732007	Nucleocytoviricota	origin = eukaryotic	0.391424	84.2	90.8	CAMK FAMILY PROTEIN KINASE	0.5	6	Domain of unknown function (DUF1768)	0.542781	374	381	Cytoplasm
COG001851	VtoE	33634	Stramenopiles	2732007	Nucleocytoviricota	origin = virus	0.25304	87.3	87.2	KDEL LYS-ASP-GLU-LEU CONTAINING - RELATED	0.9568	162	Glycosyl transferase family 90	0.793103	174	178	Nucleus
COG002455	VtoE	33634	Stramenopiles	2732007	Nucleocytoviricota	origin = unkn	0.570074	root	root	DEAD/H RNA HELICASE, PUTATIVE-RELATED	0.9444	126	helicase activity	0.674419	129	138	Nucleus
COG006620	VtoE	126957	Strigamia maritima	346673	Coccolithovirus	origin = virus	2.15744	84.1	root	E3 UBIQUITIN-PROTEIN LIGASE PRAJA	0.4444	9	ubiquitin-protein transferase activity	0.333333	6	11	Nucleus
COG006205	VtoE	126957	Strigamia maritima	2732007	Nucleocytoviricota	origin = eukaryotic	0.610527	91.4	99.2	UNCHARACTERIZED	1	8	Probable N6-adenine methyltransferase	0.666667	6	14	Nucleus
COG000195	VtoE	126957	Strigamia maritima	Weakly supported	Weakly supported	origin = eukaryotic, long branching recipient	4.44175	83.3	85.3	URACIL-DNA GLYCOSYLASE	0.9941	847	Excises uracil residues from the DNA which can arise as a result of misincorporation of dUMP residues by DNA polymerase or due to deamination of cytosine	0.505976	1004	1012	Cytoplasm
COG000482	VtoE	126957	Strigamia maritima	Weakly supported	Weakly supported	origin = unkn, long branching recipient	1.88893	88.2	93.5	RIBONUCLEASE H1	0.9981	530	Endonuclease that specifically degrades the RNA of RNA- DNA hybrids	0.539162	549	565	Nucleus
COG000110	VtoE	7668	Strongylocentrotus purpuratus	10508	Adenoviridae	origin = eukaryotic, cousin unclear	0.277194	96.8	93.9	DEOXYURIDINE 5'-TRIPHOSPHATE NUCLEOTIDOHYDROLASE	1	940	dUTPase	0.432432	1406	1412	Cytoplasm
COG000243	VtoE	7668	Strongylocentrotus purpuratus	573012	Raphidovirus	origin = eukaryotic	0.33244	83.6	96	DISCOIDIN, CUB, EGF, LAMININ , AND ZINC METALLOPROTEASE DOMAIN CONTAINING	0.9766	728	metalloendopeptidase activity	0.292237	876	890	Unknown
COG000055	VtoE	7668	Strongylocentrotus purpuratus	Weakly supported	Weakly supported	origin = eukaryotic, long branching recipient	0.86769	98.7	95.9	DNA TOPOISOMERASE/GYRASE	0.9857	2162	Control of topological states of DNA by transient breakage and subsequent rejoining of DNA strands	0.471552	2197	2268	Cytoplasm
COG000084	VtoE	7668	Strongylocentrotus purpuratus	Weakly supported	Weakly supported	origin = eukaryotic, long branching recipient	4.01615	100	96.7	DNA HELICASE RECQ FAMILY MEMBER	0.9964	1391	four-way junction helicase activity	0.183824	1632	1661	Nucleus
COG000869	VtoE	7668	Strongylocentrotus purpuratus	Weakly supported	Weakly supported	origin = prokaryotic, long branching recipient	2.40222	88.5	89.1	MYOINOSITOL OXYGENASE	0.9876	241	Myo-inositol oxygenase	0.454039	359	363	Unknown
COG005532	VtoE	5949	Stylonychia lemnae	2732523	Megaviricetes	origin = virus	2.34853	82.2	83.5	RING ZINC FINGER PROTEIN-RELATED	0.3846	13	RING-like zinc finger	0.285714	14	18	Nucleus
COG004558	VtoE	50429	Stylophora pistillata	Weakly supported	Weakly supported	origin = virus, long branching recipient	2.27396	91.3	root	KELCH PROTEIN	0.963	27	BTB And C-terminal Kelch	0.551724	29	33	Cytoplasm
COG000993	VtoE	89954	Suessiales	549779	Mimiviridae	origin = unkn, cousin unclear	0.953489	89.8	87.8	No annotation	0	0	no annotation	0	0	329	Mitochondrion
COG004576	VtoE	89954	Suessiales	2732523	Megaviricetes	origin = virus	0.577672	86.9	98.9	No annotation	0	0	REJ domain	1	30	33	Unknown
COG001814	VtoE	89954	Suessiales	Weakly supported	Weakly supported	origin = eukaryotic, long branching donor	0.578592	82.5	97	A-TYPE INCLUSION PROTEIN, PUTATIVE-RELATED	1	1	no annotation	0	0	182	Nucleus
COG001631	VtoE	2949	Symbiodinium	2100421	uncultured Caudovirales phage	origin = prokaryotic	0.735333	85.2	98.3	7-CYANO-7-DEAZAGUANINE SYNTHASE	0.9808	52	Catalyzes the ATP-dependent conversion of 7-carboxy-7- deazaguanine (CDG) to 7-cyano-7-deazaguanine (preQ(0))	0.777228	202	202	Cytoplasm
COG003517	VtoE	2949	Symbiodinium	2487765	Edafosvirus sp.	origin = prokaryotic	0.774854	95.1	90	No annotation	0	0	Protein of unknown function (DUF1152)	1	65	66	Unknown
COG004387	VtoE	2949	Symbiodinium	Weakly supported	Weakly supported	origin = virus, sister unclear	1.00207	87	root	PTHR12393:SF6	1	1	no annotation	0	0	37	Cytoplasm
COG004387	VtoE	154548	Symbiodinium goreaui	10239	Viruses	origin = virus	0.857507	91	85.2	PTHR12393:SF6	1	1	no annotation	0	0	37	Unknown
COG000048	VtoE	154548	Symbiodinium goreaui	Weakly supported	Weakly supported	origin = unkn, long branching recipient	3.62143	87.5	100	RIBONUCLEOSIDE-DIPHOSPHATE REDUCTASE LARGE CHAIN	0.9955	2244	Provides the precursors necessary for DNA synthesis	0.506765	2439	2481	Mitochondrion
COG000378	VtoE	154548	Symbiodinium goreaui	Weakly supported	Weakly supported	origin = prokaryotic, long branching donor	0.41885	95.6	88.9	NICOTINAMIDE PHOSPHORIBOSYLTRANSFERASE	1	487	nicotinate-nucleotide diphosphorylase (carboxylating) activity	0.483721	645	651	Cytoplasm
COG000661	VtoE	154548	Symbiodinium goreaui	Weakly supported	Weakly supported	origin = prokaryotic, long branching recipient	1.34031	86.7	82.6	REPLICATIVE DNA HELICASE DNAB	0.9953	215	Participates in initiation and elongation during chromosome replication	0.491031	446	448	Cytoplasm
COG000756	VtoE	154548	Symbiodinium goreaui	Weakly supported	Weakly supported	origin = prokaryotic, long branching recipient	1.22758	94.7	81.3	RNA METHYLASE-RELATED	0.9868	76	Belongs to the N(4) N(6)-methyltransferase family	0.329146	398	400	Cytoplasm
COG000821	VtoE	154548	Symbiodinium goreaui	Weakly supported	Weakly supported	origin = eukaryotic, long branching recipient	1.48522	80.8	90.1	RAN GTPASE	0.967	364	GTP-binding protein involved in nucleocytoplasmic transport	0.651351	370	376	Nucleus
COG001253	VtoE	154548	Symbiodinium goreaui	Weakly supported	Weakly supported	origin = prokaryotic, long branching recipient	2.04514	84.1	89.4	CYTOSINE DEAMINASE FAMILY MEMBER	0.5714	7	SET (Su(var)3-9, Enhancer-of-zeste, Trithorax) domain	0.619608	255	262	Unknown
COG001631	VtoE	154548	Symbiodinium goreaui	Weakly supported	Weakly supported	origin = prokaryotic, long branching donor	0.753876	84	89.1	7-CYANO-7-DEAZAGUANINE SYNTHASE	0.9808	52	Catalyzes the ATP-dependent conversion of 7-carboxy-7- deazaguanine (CDG) to 7-cyano-7-deazaguanine (preQ(0))	0.777228	202	202	Cytoplasm
COG001480	VtoE	104179	Symbiodinium kawagutii	Weakly supported	Weakly supported	origin = prokaryotic, long branching recipient	1.44921	82.6	80.3	ANKYRIN REPEAT AND PROTEIN KINASE DOMAIN-CONTAINING PROTEIN	1	1	Putative 2OG-Fe(II) oxygenase	0.948837	215	222	Cytoplasm
COG002433	VtoE	104179	Symbiodinium kawagutii	Weakly supported	Weakly supported	origin = eukaryotic, long branching recipient	2.55552	81.9	82.3	UBIQUITIN	0.9925	134	ubiquitin	0.514706	136	140	Unknown
COG005151	VtoE	104179	Symbiodinium kawagutii	Weakly supported	Weakly supported	origin = virus, long branching recipient	3.21285	95.7	root	No annotation	0	0	Glycosyl transferases group 1	0.8	5	23	Unknown
COG005158	VtoE	104179	Symbiodinium kawagutii	Weakly supported	Weakly supported	origin = virus, sister unclear	2.06859	100	root	No annotation	0	0	Viral RNA-directed RNA-polymerase	1	18	23	Cytoplasm
COG000199	VtoE	2951	Symbiodinium microadriaticum	10239	Viruses	origin = virus	0.958462	87.6	88.3	DNA-DIRECTED RNA POLYMERASE I SUBUNIT 2	0.3333	3	HNH endonuclease	0.732632	950	1001	Mitochondrion
COG000536	VtoE	2951	Symbiodinium microadriaticum	10501	Phycodnaviridae	origin = eukaryotic	1.50118	95.4	93.4	TARTRATE-RESISTANT ACID PHOSPHATASE TYPE 5	0.9885	347	Calcineurin-like phosphoesterase	0.293436	518	526	Unknown
COG000733	VtoE	2951	Symbiodinium microadriaticum	10501	Phycodnaviridae	origin = unkn	1.60162	86.8	85.9	POLYNUCLEOTIDYL TRANSFERASE, RIBONUCLEASE H-LIKE SUPERFAMILY PROTEIN	0.9701	268	RNase H	0.298246	399	412	Cytoplasm
COG004974	VtoE	2951	Symbiodinium microadriaticum	2585030	unclassified Riboviria	origin = virus	0.968276	96.8	100	No annotation	0	0	no annotation	0	0	26	Cytoplasm
COG002474	VtoE	2951	Symbiodinium microadriaticum	2732523	Megaviricetes	origin = prokaryotic	0.62978	95.4	99.9	PEROXIDASE-RELATED	0.92	25	phosphoesterase, PA-phosphatase related	0.78626	131	136	Cell_membrane
COG000048	VtoE	2951	Symbiodinium microadriaticum	Weakly supported	Weakly supported	origin = unkn, long branching recipient	2.85273	95.9	98.8	RIBONUCLEOSIDE-DIPHOSPHATE REDUCTASE LARGE CHAIN	0.9955	2244	Provides the precursors necessary for DNA synthesis	0.506765	2439	2481	Unknown
COG000491	VtoE	2951	Symbiodinium microadriaticum	Weakly supported	Weakly supported	origin = unkn, long branching recipient	2.52943	90	84	WASP INTERACTING PROTEIN-RELATED	0.3333	3	ATP-dependent DNA helicase activity	0.998095	525	559	Nucleus
COG000923	VtoE	2951	Symbiodinium microadriaticum	Weakly supported	Weakly supported	origin = unkn, long branching recipient	3.37746	83.7	89.7	DNA-INVERTASE FROM LAMBDOID PROPHAGE	1	79	Recombinase	0.33526	346	347	Mitochondrion
COG000951	VtoE	2951	Symbiodinium microadriaticum	Weakly supported	Weakly supported	origin = virus, long branching recipient	2.94285	87.2	root	LITTLE ELONGATION COMPLEX SUBUNIT 2	1	1	NUDIX domain	0.5	2	341	Cytoplasm
COG005158	VtoE	2951	Symbiodinium microadriaticum	Weakly supported	Weakly supported	origin = virus, long branching recipient	4.44691	99	99	No annotation	0	0	Viral RNA-directed RNA-polymerase	1	18	23	Peroxisome
COG006057	VtoE	2951	Symbiodinium microadriaticum	Weakly supported	Weakly supported	origin = virus, long branching recipient	2.68424	94.3	root	MITOCHONDRIAL GLYCINE TRANSPORTER	1	2	no annotation	0	0	14	Mitochondrion
COG000183	VtoE	47790	Tetrabaena socialis	10239	Viruses	origin = eukaryotic	1.33345	84.9	94.7	DEOXYNUCLEOSIDE KINASE	0.997	1005	Deoxynucleoside kinase	0.522124	1017	1047	Cytoplasm
COG000303	VtoE	47790	Tetrabaena socialis	10239	Viruses	origin = eukaryotic	0.46549	96.9	83.5	GDP-MANNOSE 4,6-DEHYDRATASE	0.99	600	Catalyzes the conversion of GDP-D-mannose to GDP-4- dehydro-6-deoxy-D-mannose	0.357049	759	771	Cytoplasm
COG000759	VtoE	47790	Tetrabaena socialis	10239	Viruses	origin = prokaryotic	0.322497	95.6	93.5	SLR1610 PROTEIN	0.92	75	Putative zinc binding domain	0.387909	397	398	Cytoplasm
COG000848	VtoE	47790	Tetrabaena socialis	10239	Viruses	origin = virus	0.123303	root	root	TRANSCRIPTION TERMINATION FACTOR 2-RELATED	0.9767	344	N-methyltransferase activity	0.988571	350	369	Cytoplasm
COG001488	VtoE	47790	Tetrabaena socialis	10239	Viruses	origin = unkn	1.41182	99.8	root	ANNEXIN	0.9341	182	Patatin-like phospholipase	0.666667	216	220	Unknown
COG001870	VtoE	47790	Tetrabaena socialis	10239	Viruses	origin = unkn, cousin unclear	0.979921	85.8	root	UBIQUITIN-ASSOCIATED AND SH3 DOMAIN-CONTAINING BA-RELATED	1	1	Methyltransferase domain	0.736196	163	177	Unknown
COG002989	VtoE	47790	Tetrabaena socialis	10239	Viruses	origin = virus	1.33742	99	92.6	UVRD / RECB / PCRA DNA HELICASE FAMILY MEMBER	1	2	Competence protein	0.818182	11	94	Cytoplasm
COG000019	VtoE	47790	Tetrabaena socialis	455363	unclassified Phycodnaviridae	origin = eukaryotic	0.318192	81	82.8	HEAT SHOCK PROTEIN 70KDA	0.8288	3895	Belongs to the heat shock protein 70 family	0.27064	4530	4585	Cytoplasm
COG000024	VtoE	47790	Tetrabaena socialis	455363	unclassified Phycodnaviridae	origin = unkn	0.409868	95.4	99.6	DNA-DIRECTED RNA POLYMERASE I SUBUNIT 2	0.9997	3308	DNA-dependent RNA polymerase catalyzes the transcription of DNA into RNA using the four ribonucleoside triphosphates as substrates	0.58331	3511	3673	Cytoplasm
COG000031	VtoE	47790	Tetrabaena socialis	455363	unclassified Phycodnaviridae	origin = virus	0.152847	85.7	83.9	REGULATOR OF CHROMOSOME CONDENSATION	0.5	4	Large eukaryotic DNA virus major capsid protein	0.999061	3194	3272	Unknown
COG000038	VtoE	47790	Tetrabaena socialis	455363	unclassified Phycodnaviridae	origin = unkn	0.494788	92.4	100	DNA-DIRECTED RNA POLYMERASE	0.9996	2582	DNA-dependent RNA polymerase catalyzes the transcription of DNA into RNA using the four ribonucleoside triphosphates as substrates	0.704619	2793	2889	Cytoplasm
COG000043	VtoE	47790	Tetrabaena socialis	455363	unclassified Phycodnaviridae	origin = unkn	0.36509	86.9	91.4	THYMIDYLATE SYNTHASE 1	0.701	2381	Thymidylate synthase	0.35328	2607	2647	Unknown
COG000055	VtoE	47790	Tetrabaena socialis	455363	unclassified Phycodnaviridae	origin = eukaryotic	0.411906	100	95.6	DNA TOPOISOMERASE/GYRASE	0.9857	2162	Control of topological states of DNA by transient breakage and subsequent rejoining of DNA strands	0.471552	2197	2268	Unknown
COG000087	VtoE	47790	Tetrabaena socialis	455363	unclassified Phycodnaviridae	origin = virus	0.470275	99.6	99.8	ATP BINDING PROTEIN-RELATED	0.9993	1453	D5 N terminal like	0.970588	1530	1632	Unknown
COG000094	VtoE	47790	Tetrabaena socialis	455363	unclassified Phycodnaviridae	origin = prokaryotic	0.63964	85.6	98.4	RAD25/XP-B DNA REPAIR HELICASE	0.9837	1167	N-methyltransferase activity	0.794233	1526	1582	Cytoplasm
COG000114	VtoE	47790	Tetrabaena socialis	455363	unclassified Phycodnaviridae	origin = prokaryotic	0.762171	87.3	92.4	RIBONUCLEASE III	0.5405	840	rRNA catabolic process	0.737232	1351	1392	Cytoplasm
COG000131	VtoE	47790	Tetrabaena socialis	455363	unclassified Phycodnaviridae	origin = unkn	0.634018	91.5	88.5	3-5 EXONUCLEASE	0.5	2	Poxvirus Late Transcription Factor VLTF3 like	1	1227	1276	Nucleus
COG000149	VtoE	47790	Tetrabaena socialis	455363	unclassified Phycodnaviridae	origin = virus	0.966339	89.3	90.5	EXONUCLEASE, PHAGE-TYPE/RECB, C-TERMINAL DOMAIN-CONTAINING PROTEIN	1	970	induction by virus of catabolism of host mRNA	0.993601	1094	1147	Cytoplasm
COG000158	VtoE	47790	Tetrabaena socialis	455363	unclassified Phycodnaviridae	origin = virus	0.291809	90.2	98.1	PROLIFERATING CELL NUCLEAR ANTIGEN	1	1088	Proliferating cell nuclear antigen, C-terminal domain	0.969973	1099	1129	Cytoplasm
COG000165	VtoE	47790	Tetrabaena socialis	455363	unclassified Phycodnaviridae	origin = eukaryotic	0.547694	84.8	93	TRANSCRIPTION FACTOR S-II ZINC FINGER DOMAIN-CONTAINING PROTEIN	1	934	Transcription factor S-II (TFIIS)	0.307116	1068	1112	Nucleus
COG000179	VtoE	47790	Tetrabaena socialis	455363	unclassified Phycodnaviridae	origin = virus	1.19678	84.5	89.1	5'->3' EXORIBONUCLEASE	1	1016	XRN 5'-3' exonuclease N-terminus	0.779195	1019	1056	Cytoplasm
COG000196	VtoE	47790	Tetrabaena socialis	455363	unclassified Phycodnaviridae	origin = virus	1.01967	84.9	80.3	ATP DEPENDENT LON PROTEASE FAMILY MEMBER	0.9572	957	ATP-dependent peptidase activity	0.77732	970	1008	Cytoplasm
COG000200	VtoE	47790	Tetrabaena socialis	455363	unclassified Phycodnaviridae	origin = virus	0.242853	98.9	95.5	TRANSCRIPTION INITIATION FACTOR IIB-RELATED	0.9989	944	TBP-class protein binding	0.896767	959	996	Unknown
COG000205	VtoE	47790	Tetrabaena socialis	455363	unclassified Phycodnaviridae	origin = virus	0.8229	90.6	99.8	No annotation	0	0	Ulp1 protease family, C-terminal catalytic domain	1	959	985	Unknown
COG000260	VtoE	47790	Tetrabaena socialis	455363	unclassified Phycodnaviridae	origin = virus	0.929939	84.2	95.5	DNA-DIRECTED RNA POLYMERASE	0.9983	598	RNA polymerase Rpb3/RpoA insert domain	0.662999	727	859	Nucleus
COG000387	VtoE	47790	Tetrabaena socialis	455363	unclassified Phycodnaviridae	origin = prokaryotic	0.735464	85.6	97.2	DNA-DIRECTED RNA POLYMERASES I, II, AND III SUBUNIT RPABC1	0.9977	426	DNA-dependent RNA polymerase catalyzes the transcription of DNA into RNA using the four ribonucleoside triphosphates as substrates	0.3312	625	639	Unknown
COG000524	VtoE	47790	Tetrabaena socialis	455363	unclassified Phycodnaviridae	origin = unkn	1.13573	98	99.9	LEUCINE AMINOPEPTIDASE-RELATED	1	379	Presumably involved in the processing and regular turnover of intracellular proteins	0.430451	532	535	Cytoplasm
COG000538	VtoE	47790	Tetrabaena socialis	455363	unclassified Phycodnaviridae	origin = eukaryotic, cousin unclear	0.748357	94	90.5	COLD SHOCK DOMAIN CONTAINING PROTEINS	0.6569	478	Cold shock protein domain	0.266033	421	526	Unknown
COG000799	VtoE	47790	Tetrabaena socialis	455363	unclassified Phycodnaviridae	origin = unkn	0.5792	97.2	88.1	ATP-DEPENDENT CLP PROTEASE PROTEOLYTIC SUBUNIT	1	323	N-methyltransferase activity	0.742466	365	388	Cytoplasm
COG001043	VtoE	47790	Tetrabaena socialis	455363	unclassified Phycodnaviridae	origin = virus	1.07537	93.6	88.1	ATP-BINDING CASSETTE SUB-FAMILY B	0.8073	301	ATPase activity, coupled to transmembrane movement of substances	0.229236	301	310	Lysosome/Vacuole
COG001124	VtoE	47790	Tetrabaena socialis	455363	unclassified Phycodnaviridae	origin = virus	0.49654	100	86.1	No annotation	0	0	Domain of unknown function (DUF4338)	0.9	10	291	Nucleus
COG001886	VtoE	47790	Tetrabaena socialis	455363	unclassified Phycodnaviridae	origin = unkn, cousin unclear	0.756897	92.7	88.6	ALTERED INHERITANCE OF MITOCHONDRIA PROTEIN 24, MITOCHONDRIAL	0.913	23	Mitochondrial biogenesis AIM24	0.791908	173	176	Cytoplasm
COG002014	VtoE	47790	Tetrabaena socialis	455363	unclassified Phycodnaviridae	origin = unkn	1.08841	99.3	88.6	MANNOSYL PHOSPHORYLINOSITOL CERAMIDE SYNTHASE	0.9744	39	Capsular polysaccharide synthesis protein	0.987261	157	164	Endoplasmic_reticulum
COG002027	VtoE	47790	Tetrabaena socialis	455363	unclassified Phycodnaviridae	origin = unkn	0.647929	92.3	94	ATP BINDING PROTEIN-RELATED	0.9565	23	D5 N terminal like	1	153	163	Cytoplasm
COG002846	VtoE	47790	Tetrabaena socialis	455363	unclassified Phycodnaviridae	origin = unkn	1.4418	80.8	99.9	No annotation	0	0	no annotation	0	0	103	Peroxisome
COG004712	VtoE	47790	Tetrabaena socialis	455363	unclassified Phycodnaviridae	origin = virus	1.13858	89.1	84.5	GLYCOSYLTRANSFERASE 25 FAMILY MEMBER	1	1	glycosyltransferase involved in LPS biosynthesis	0.555556	27	30	Cytoplasm
COG006125	VtoE	47790	Tetrabaena socialis	455363	unclassified Phycodnaviridae	origin = prokaryotic	0.454613	91.3	85	LEUCINE-RICH PROTEIN	0.4	5	outer membrane	0.2	10	14	Mitochondrion
COG000115	VtoE	47790	Tetrabaena socialis	2732007	Nucleocytoviricota	origin = eukaryotic	0.490618	96.8	99.9	ASPARAGINE SYNTHETASE	0.9916	1072	Aluminium induced protein	0.208791	1365	1386	Cytoplasm
COG000156	VtoE	47790	Tetrabaena socialis	2732007	Nucleocytoviricota	origin = virus	0.852766	94.5	84.6	SWI/SNF-RELATED MATRIX-ASSOCIATED ACTIN-DEPENDENT REGULATOR OF CHROMATIN SUBFAMILY D	1	769	SWI complex, BAF60b domains	0.497319	746	1131	Unknown
COG000845	VtoE	47790	Tetrabaena socialis	2732007	Nucleocytoviricota	origin = virus	0.980604	90.1	83.6	PTHR47810	0.9944	355	DNA ligase (ATP) activity	0.924119	369	371	Unknown
COG000938	VtoE	47790	Tetrabaena socialis	2732007	Nucleocytoviricota	origin = eukaryotic	0.935469	89.6	89.5	PTHR35596	0.9675	154	Uncharacterized protein conserved in bacteria (DUF2263)	0.957704	331	343	Cytoplasm
COG000972	VtoE	47790	Tetrabaena socialis	2732007	Nucleocytoviricota	origin = unkn	0.528935	87.4	82.7	CYSTEINE PROTEASE FAMILY C1-RELATED	0.9855	69	Papain family cysteine protease	0.321981	323	333	Cytoplasm
COG001221	VtoE	47790	Tetrabaena socialis	2732007	Nucleocytoviricota	origin = unkn	0.388623	100	90.7	EPIMERASE-RELATED	0.9821	112	GDP-mannose 4,6 dehydratase	0.233962	265	270	Cytoplasm
COG001801	VtoE	47790	Tetrabaena socialis	2732007	Nucleocytoviricota	origin = prokaryotic	0.822904	97.4	88.9	RHAMNAN SYNTHESIS F	1	1	methyltransferase	0.588235	17	183	Endoplasmic_reticulum
COG001854	VtoE	47790	Tetrabaena socialis	2732007	Nucleocytoviricota	origin = virus	1.20218	91.5	82.9	RECBCD ENZYME SUBUNIT RECD	1	2	COG1403 Restriction endonuclease	0.981651	109	178	Unknown
COG002014	VtoE	47790	Tetrabaena socialis	2732007	Nucleocytoviricota	origin = unkn	0.579606	82.9	84.6	MANNOSYL PHOSPHORYLINOSITOL CERAMIDE SYNTHASE	0.9744	39	Capsular polysaccharide synthesis protein	0.987261	157	164	Endoplasmic_reticulum
COG002014	VtoE	47790	Tetrabaena socialis	2732007	Nucleocytoviricota	origin = unkn	0.568746	91.9	91.7	MANNOSYL PHOSPHORYLINOSITOL CERAMIDE SYNTHASE	0.9744	39	Capsular polysaccharide synthesis protein	0.987261	157	164	Cytoplasm
COG002311	VtoE	47790	Tetrabaena socialis	2732007	Nucleocytoviricota	origin = virus	1.00317	97.2	92.6	PROCOLLAGEN-LYSINE,2-OXOGLUTARATE 5-DIOXYGENASE/GLYCOSYLTRANSFERASE 25 FAMILY MEMBER	1	48	Glycosyltransferase family 25 (LPS biosynthesis protein)	0.259259	135	149	Unknown
COG004568	VtoE	47790	Tetrabaena socialis	2732007	Nucleocytoviricota	origin = unkn	1.01486	88.8	98.9	GLYCOSYLTRANSFERASE-LIKE KOBITO 1	0.8889	9	spermidine synthase activity	0.925926	27	33	Unknown
COG001590	VtoE	47790	Tetrabaena socialis	2732523	Megaviricetes	origin = virus	0.620117	92.5	100	RAD25/XP-B DNA REPAIR HELICASE	0.8358	67	DNA binding	0.2	95	207	Cytoplasm
COG001590	VtoE	47790	Tetrabaena socialis	2732523	Megaviricetes	origin = virus	0.339472	85	99	RAD25/XP-B DNA REPAIR HELICASE	0.8358	67	DNA binding	0.2	95	207	Cytoplasm
COG000024	VtoE	47790	Tetrabaena socialis	Weakly supported	Weakly supported	origin = unkn, long branching recipient	0.866886	99.9	97.7	DNA-DIRECTED RNA POLYMERASE I SUBUNIT 2	0.9997	3308	DNA-dependent RNA polymerase catalyzes the transcription of DNA into RNA using the four ribonucleoside triphosphates as substrates	0.58331	3511	3673	Unknown
COG000038	VtoE	47790	Tetrabaena socialis	Weakly supported	Weakly supported	origin = unkn, long branching recipient	2.6679	100	96.5	DNA-DIRECTED RNA POLYMERASE	0.9996	2582	DNA-dependent RNA polymerase catalyzes the transcription of DNA into RNA using the four ribonucleoside triphosphates as substrates	0.704619	2793	2889	Unknown
COG000058	VtoE	47790	Tetrabaena socialis	Weakly supported	Weakly supported	origin = prokaryotic, long branching donor	1.17811	98.7	95.5	CHAPERONE-ACTIVITY OF BC1 COMPLEX CABC1 -RELATED	0.4173	1572	ABC1 family	0.354483	2175	2210	Mitochondrion
COG000156	VtoE	47790	Tetrabaena socialis	Weakly supported	Weakly supported	origin = virus, long branching recipient	1.58156	87.8	88.9	SWI/SNF-RELATED MATRIX-ASSOCIATED ACTIN-DEPENDENT REGULATOR OF CHROMATIN SUBFAMILY D	1	769	SWI complex, BAF60b domains	0.497319	746	1131	Mitochondrion
COG000157	VtoE	47790	Tetrabaena socialis	Weakly supported	Weakly supported	origin = virus, long branching recipient	2.6724	95.5	90	ROLLING PEBBLES, ISOFORM B	1	1	metallopeptidase activity	1	1046	1130	Unknown
COG000164	VtoE	47790	Tetrabaena socialis	Weakly supported	Weakly supported	origin = virus, long branching recipient	1.22055	91.2	95.7	MRNA GUANINE-7- METHYLTRANSFERASE	0.9712	1008	mRNA (guanine-N7-)-methyltransferase activity	0.755814	1032	1114	Cytoplasm
COG000167	VtoE	47790	Tetrabaena socialis	Weakly supported	Weakly supported	origin = virus, long branching recipient	1.51504	98.8	root	DNA MISMATCH REPAIR PROTEIN MUTS FAMILY MEMBER	1	951	Belongs to the DNA mismatch repair MutS family	0.832188	1019	1100	Cytoplasm
COG000200	VtoE	47790	Tetrabaena socialis	Weakly supported	Weakly supported	origin = virus, long branching recipient	0.779028	94.6	95.5	TRANSCRIPTION INITIATION FACTOR IIB-RELATED	0.9989	944	TBP-class protein binding	0.896767	959	996	Mitochondrion
COG000251	VtoE	47790	Tetrabaena socialis	Weakly supported	Weakly supported	origin = virus, long branching recipient	0.924372	80.8	90.6	DNA-DIRECTED RNA POLYMERASES I, II, AND III SUBUNIT RPABC5 FAMILY MEMBER	1	685	RNA polymerases N / 8 kDa subunit	0.328496	758	878	Unknown
COG000255	VtoE	47790	Tetrabaena socialis	Weakly supported	Weakly supported	origin = virus, long branching recipient	0.598161	87.8	96.5	No annotation	0	0	no annotation	0	0	868	Unknown
COG000445	VtoE	47790	Tetrabaena socialis	Weakly supported	Weakly supported	origin = virus, sister unclear	0.773346	87.5	82.7	AQUAPORIN-8	0.9918	487	Major intrinsic protein	0.4375	432	592	Unknown
COG000549	VtoE	47790	Tetrabaena socialis	Weakly supported	Weakly supported	origin = eukaryotic, long branching recipient	1.98431	82.1	94.8	BCS1 AAA-TYPE ATPASE	0.9869	459	Belongs to the AAA ATPase family	0.298387	496	516	Cytoplasm
COG000609	VtoE	47790	Tetrabaena socialis	Weakly supported	Weakly supported	origin = virus, long branching recipient	2.13048	99	86.8	BCS1 AAA-TYPE ATPASE	1	442	ATPase activity	0.522422	446	481	Mitochondrion
COG001767	VtoE	47790	Tetrabaena socialis	Weakly supported	Weakly supported	origin = virus, long branching donor	1.35886	87.6	92	CO-CHAPERONE PROTEIN DJLA	0.6	15	DnaJ molecular chaperone homology domain	0.340426	47	186	Cytoplasm
COG003641	VtoE	47790	Tetrabaena socialis	Weakly supported	Weakly supported	origin = virus, long branching recipient	2.42707	root	root	No annotation	0	0	Transcription factor TFIID (or TATA-binding protein, TBP)	1	53	60	Nucleus
COG000014	VtoE	312017	Tetrahymena thermophila SB210	Weakly supported	Weakly supported	origin = prokaryotic, long branching recipient	1.32566	90.4	84.7	DNAJ HOMOLOG SUBFAMILY C MEMBER	0.3541	3253	ATP binding to DnaK triggers the release of the substrate protein, thus completing the reaction cycle	0.315643	5747	5826	Mitochondrion
COG000024	VtoE	312017	Tetrahymena thermophila SB210	Weakly supported	Weakly supported	origin = unkn, long branching recipient	1.85092	92.2	83.1	DNA-DIRECTED RNA POLYMERASE I SUBUNIT 2	0.9997	3308	DNA-dependent RNA polymerase catalyzes the transcription of DNA into RNA using the four ribonucleoside triphosphates as substrates	0.58331	3511	3673	Unknown
COG000466	VtoE	32523	Tetrapoda	Weakly supported	Weakly supported	origin = unkn, long branching recipient	1.59261	100	100	POL PROTEIN	0.7067	491	genomic stop codons	0.435897	546	576	Mitochondrion
COG000235	VtoE	159749	Thalassiosira oceanica	10239	Viruses	origin = virus	0.00363335	root	root	PHOTOSYSTEM II PROTEIN D1	1	844	Photosystem II (PSII) is a light-driven water plastoquinone oxidoreductase that uses light energy to abstract electrons from H(2)O, generating O(2) and a proton gradient subsequently used for ATP formation	0.519651	916	916	Lysosome/Vacuole
COG002958	VtoE	159749	Thalassiosira oceanica	10239	Viruses	origin = virus	1.54178	99.1	100	INOSITOL PHOSPHOCERAMIDE MANNOSYLTRANSFERASE 1	0.6667	3	O-methyltransferase	0.488372	43	96	Mitochondrion
COG004488	VtoE	159749	Thalassiosira oceanica	10239	Viruses	origin = virus	2.10308	root	root	METHYLTRANSFERASE, FKBM FAMILY PROTEIN	1	22	TIGRFAM methyltransferase FkbM	0.227273	22	35	Unknown
COG003697	VtoE	159749	Thalassiosira oceanica	2732007	Nucleocytoviricota	origin = virus	1.47663	99	84	MANNOSYL PHOSPHORYLINOSITOL CERAMIDE SYNTHASE	1	50	mannosyl-inositol phosphorylceramide biosynthetic process	0.468085	47	58	Golgi_apparatus
COG001593	VtoE	35128	Thalassiosira pseudonana	10239	Viruses	origin = eukaryotic	0.839855	81	91.3	UNNAMED PRODUCT	0.8598	107	repeat protein	0.35	160	206	Unknown
COG001293	VtoE	35128	Thalassiosira pseudonana	455363	unclassified Phycodnaviridae	origin = prokaryotic	0.87885	89.9	83.3	RIBITOL-5-PHOSPHATE XYLOSYLTRANSFERASE 1	0.5714	7	alpha-(1->3)-fucosyltransferase activity	0.882353	51	254	Mitochondrion
COG003044	VtoE	35128	Thalassiosira pseudonana	2732007	Nucleocytoviricota	origin = unkn	1.13486	92.6	94.6	ISOCITRATE DEHYDROGENASE [NADP]	1	1	no annotation	0	0	90	Extracellular
COG000014	VtoE	35128	Thalassiosira pseudonana	2732523	Megaviricetes	origin = eukaryotic, cousin unclear	0.434806	90.5	95	DNAJ HOMOLOG SUBFAMILY C MEMBER	0.3541	3253	ATP binding to DnaK triggers the release of the substrate protein, thus completing the reaction cycle	0.315643	5747	5826	Unknown
COG000024	VtoE	35128	Thalassiosira pseudonana	Weakly supported	Weakly supported	origin = unkn, long branching recipient	1.99557	83.5	93	DNA-DIRECTED RNA POLYMERASE I SUBUNIT 2	0.9997	3308	DNA-dependent RNA polymerase catalyzes the transcription of DNA into RNA using the four ribonucleoside triphosphates as substrates	0.58331	3511	3673	Cytoplasm
COG003318	VtoE	35128	Thalassiosira pseudonana	Weakly supported	Weakly supported	origin = virus, long branching recipient	2.67938	86.8	root	MANNOSYL PHOSPHORYLINOSITOL CERAMIDE SYNTHASE	0.9857	70	Glycosyltransferase sugar-binding region containing DXD motif	0.736111	72	75	Unknown
COG000845	VtoE	461836	Thecamonas trahens ATCC 50062	10239	Viruses	origin = virus	1.30635	82	87.6	PTHR47810	0.9944	355	DNA ligase (ATP) activity	0.924119	369	371	Unknown
COG005231	VtoE	461836	Thecamonas trahens ATCC 50062	10239	Viruses	origin = virus	0.770066	99.3	92	D123 PROTEIN	1	17	D123	1	20	22	Cytoplasm
COG006612	VtoE	461836	Thecamonas trahens ATCC 50062	10487	Iridovirus	origin = virus	1.20745	81.5	98.3	No annotation	0	0	SPFH domain / Band 7 family	0.777778	9	11	Unknown
COG000450	VtoE	461836	Thecamonas trahens ATCC 50062	2732007	Nucleocytoviricota	origin = eukaryotic	0.465937	82.3	99.7	INOSINE-5-MONOPHOSPHATE DEHYDROGENASE RELATED	0.9438	427	Catalyzes the conversion of inosine 5'-phosphate (IMP) to xanthosine 5'-phosphate (XMP), the first committed and rate- limiting step in the de novo synthesis of guanine nucleotides, and therefore plays an important role in the regulation of cell growth	0.698795	581	589	Mitochondrion
COG002763	VtoE	461836	Thecamonas trahens ATCC 50062	2732007	Nucleocytoviricota	origin = prokaryotic	2.75937	88.6	87.2	E3 UBIQUITIN-PROTEIN LIGASE TRIM36-RELATED	0.5789	38	Fibronectin type III domain	0.592233	103	109	Cell_membrane
COG003936	VtoE	461836	Thecamonas trahens ATCC 50062	2732007	Nucleocytoviricota	origin = virus	2.26251	root	root	FUKUTIN RELATED PROTEIN	0.9565	46	LicD family	0.265306	49	49	Unknown
COG006064	VtoE	461836	Thecamonas trahens ATCC 50062	2732007	Nucleocytoviricota	origin = prokaryotic	1.33647	82.8	99.9	No annotation	0	0	SPFH domain / Band 7 family	0.769231	13	14	Unknown
COG007217	VtoE	461836	Thecamonas trahens ATCC 50062	2732523	Megaviricetes	origin = eukaryotic	1.67091	99.8	root	PHYTANOYL-COA DIOXYGENASE-RELATED-RELATED	0.8889	9	Phytanoyl-CoA dioxygenase (PhyH)	0.888889	9	9	Cytoplasm
COG000177	VtoE	461836	Thecamonas trahens ATCC 50062	Weakly supported	Weakly supported	origin = virus, long branching recipient	2.48539	80.8	87.7	DIADENOSINE 5,5-P1,P4-TETRAPHOSPHATE PYROPHOSPHOHYDROLASE MUTT	0.9278	277	phosphatase activity	0.998066	1034	1068	Nucleus
COG000821	VtoE	461836	Thecamonas trahens ATCC 50062	Weakly supported	Weakly supported	origin = eukaryotic, long branching recipient	1.37348	81.7	83.3	RAN GTPASE	0.967	364	GTP-binding protein involved in nucleocytoplasmic transport	0.651351	370	376	Cytoplasm
COG000835	VtoE	461836	Thecamonas trahens ATCC 50062	Weakly supported	Weakly supported	origin = prokaryotic, long branching recipient	1.83878	92.1	93.4	STOMATIN-LIKE PROTEIN 2, MITOCHONDRIAL	0.9861	216	prohibitin homologues	0.314208	366	373	Extracellular
COG000348	VtoE	5875	Theileria parva	Weakly supported	Weakly supported	origin = virus, long branching recipient	1.39445	88.1	83.6	ALR/ERV	1	410	Erv1 / Alr family	0.908273	556	689	Unknown
COG000667	VtoE	5875	Theileria parva	Weakly supported	Weakly supported	origin = eukaryotic, long branching recipient	2.87209	94.2	96.6	SHEWANELLA-LIKE PROTEIN PHOSPHATASE 1	0.913	391	bis(5'-nucleosyl)-tetraphosphatase (symmetrical) activity	0.429885	435	446	Unknown
COG000056	VtoE	669202	Thelohanellus kitauei	12429	unclassified viruses	origin = unkn	0.868185	86.5	86.3	EXPRESSED PROTEIN	1	1	ATPase activity, uncoupled	0.985007	2201	2227	Unknown
COG007627	VtoE	669202	Thelohanellus kitauei	1922648	Beihai razor shell virus 4	origin = virus	1.44037	97.8	100	No annotation	0	0	Viral RNA-directed RNA-polymerase	1	2	8	Cytoplasm
COG000421	VtoE	669202	Thelohanellus kitauei	2732007	Nucleocytoviricota	origin = eukaryotic	0.334178	93.1	root	AN1-TYPE ZINC FINGER PROTEIN	0.9889	542	AN1-like Zinc finger	0.163904	543	616	Nucleus
COG000014	VtoE	669202	Thelohanellus kitauei	Weakly supported	Weakly supported	origin = eukaryotic, long branching recipient	1.25194	86.1	95	DNAJ HOMOLOG SUBFAMILY C MEMBER	0.3541	3253	ATP binding to DnaK triggers the release of the substrate protein, thus completing the reaction cycle	0.315643	5747	5826	Unknown
COG000068	VtoE	669202	Thelohanellus kitauei	Weakly supported	Weakly supported	origin = eukaryotic, long branching recipient	0.563684	86.9	92.2	RIBONUCLEOSIDE-DIPHOSPHATE REDUCTASE SMALL CHAIN	0.9972	1762	Ribonucleotide reductase, small chain	0.392931	1924	1961	Cytoplasm
COG000203	VtoE	669202	Thelohanellus kitauei	Weakly supported	Weakly supported	origin = unkn, long branching recipient	2.61797	94.2	82.5	MICROTUBULE-ASSOCIATED PROTEINS 1A/1B LIGHT CHAIN 3-RELATED	0.999	954	Belongs to the ATG8 family	0.387565	965	987	Unknown
COG000221	VtoE	32525	Theria	Weakly supported	Weakly supported	origin = eukaryotic, long branching recipient	0.138658	93.2	98.6	VIRAL ENVELOPE PROTEIN	1	795	ENV polyprotein (coat polyprotein)	0.847476	931	937	Cell_membrane
COG000043	VtoE	361077	Tieghemostelium lacteum	10239	Viruses	origin = unkn	0.646523	89.1	85.8	THYMIDYLATE SYNTHASE 1	0.701	2381	Thymidylate synthase	0.35328	2607	2647	Unknown
COG008966	VtoE	361077	Tieghemostelium lacteum	10487	Iridovirus	origin = virus	1.13401	root	root	ZINC FINGER (C3HC4-TYPE RING FINGER) FAMILY PROTEIN	1	1	PFAM von Willebrand factor type A	0.2	5	5	Unknown
COG008472	VtoE	361077	Tieghemostelium lacteum	2170413	Siphoviridae sp.	origin = virus	5.91108	92.5	root	No annotation	0	0	regulation of transcription, DNA-dependent	0.8	5	6	Nucleus
COG000005	VtoE	361077	Tieghemostelium lacteum	2732007	Nucleocytoviricota	origin = eukaryotic, cousin unclear	1.21284	93.9	87.6	DRAB5-RELATED	0.2327	10584	Rab subfamily of small GTPases	0.149102	10798	10903	Cytoplasm
COG006197	VtoE	361077	Tieghemostelium lacteum	2732523	Megaviricetes	origin = virus	0.526348	94.8	99.9	No annotation	0	0	Helitron helicase-like domain at N-terminus	1	1	14	Cytoplasm
COG000162	VtoE	361077	Tieghemostelium lacteum	Weakly supported	Weakly supported	origin = unkn, long branching recipient	2.34318	82.7	96.4	UBIQUITIN CARBOXYL-TERMINAL HYDROLASE	1	1081	Belongs to the peptidase C19 family	0.372835	1097	1116	Unknown
COG004151	VtoE	361077	Tieghemostelium lacteum	Weakly supported	Weakly supported	origin = virus, sister unclear	0.77132	86.9	95.1	D123 PROTEIN	1	2	D123	0.666667	6	43	Cytoplasm
COG005140	VtoE	285029	Togula jolla	455363	unclassified Phycodnaviridae	origin = virus	2.04787	92	100	ALR/ERV	1	12	Erv1 / Alr family	1	22	23	Extracellular
COG001056	VtoE	285029	Togula jolla	2559587	Riboviria	origin = virus	1.10671	100	82.9	No annotation	0	0	RNA helicase activity	0.986301	219	307	Cytoplasm
COG000021	VtoE	285029	Togula jolla	2732007	Nucleocytoviricota	origin = eukaryotic	0.164121	99.6	88	CYSTEINE PROTEASE FAMILY C1-RELATED	0.9951	3849	Belongs to the peptidase C1 family	0.410457	4093	4142	Unknown
COG000110	VtoE	285029	Togula jolla	2732007	Nucleocytoviricota	origin = unkn, cousin unclear	0.344512	91.6	87.5	DEOXYURIDINE 5'-TRIPHOSPHATE NUCLEOTIDOHYDROLASE	1	940	dUTPase	0.432432	1406	1412	Cytoplasm
COG000776	VtoE	285029	Togula jolla	2732007	Nucleocytoviricota	origin = unkn	0.15573	100	100	ATP-BINDING TRANSPORT PROTEIN-RELATED	0.9886	351	ABC transporter	0.341598	363	394	Unknown
COG000889	VtoE	285029	Togula jolla	2732523	Megaviricetes	origin = virus	1.57507	96.7	95.8	DUF814-RELATED	1	56	Domain of unknown function (DUF814)	0.296296	135	359	Cytoplasm
COG005532	VtoE	285029	Togula jolla	2732523	Megaviricetes	origin = virus	3.19279	82.2	83.5	RING ZINC FINGER PROTEIN-RELATED	0.3846	13	RING-like zinc finger	0.285714	14	18	Unknown
COG003344	VtoE	285029	Togula jolla	Weakly supported	Weakly supported	origin = eukaryotic, long branching recipient	2.08945	90.1	89.3	HIGH MOBILITY GROUP PROTEIN DSP1	0.9265	68	high mobility group	0.232143	56	73	Cytoplasm
COG003726	VtoE	285029	Togula jolla	Weakly supported	Weakly supported	origin = virus, long branching recipient	2.64709	90.5	88.2	HISTONE H3 METHYLTRANSFERASE	0.8182	11	Histone methylation protein DOT1	0.564103	39	57	Unknown
COG000071	VtoE	543379	Trichomalopsis sarcophagae	10239	Viruses	origin = eukaryotic	1.01577	86.1	82.3	SERINE PROTEASE INHIBITOR, SERPIN	0.9977	1735	Belongs to the serpin family	0.251306	1914	1927	Unknown
COG003145	VtoE	543379	Trichomalopsis sarcophagae	10239	Viruses	origin = virus	0.332656	91.5	90.4	No annotation	0	0	retrotransposable element Tf2 155 kDa protein type 1-like	0.6	75	85	Mitochondrion
COG005829	VtoE	543379	Trichomalopsis sarcophagae	10260	Avipoxvirus	origin = virus	1.89905	92.3	root	ANKYRIN REPEAT-CONTAINING PROTEIN DDB_G0279043	0.375	16	aspartic-type endopeptidase activity	0.933333	15	16	Unknown
COG002929	VtoE	543379	Trichomalopsis sarcophagae	Weakly supported	Weakly supported	origin = virus, long branching recipient	2.28045	86.2	91.4	CARBONIC ANHYDRASE	1	97	Eukaryotic-type carbonic anhydrase	1	98	98	Unknown
COG006508	VtoE	543379	Trichomalopsis sarcophagae	Weakly supported	Weakly supported	origin = virus, long branching recipient	2.8284	99.8	root	ANKYRIN REPEAT-CONTAINING PROTEIN DDB_G0279043	0.5833	12	aspartic-type endopeptidase activity	0.916667	12	12	Cytoplasm
COG000710	VtoE	5722	Trichomonas vaginalis	10239	Viruses	origin = unkn	1.14142	85.5	90.2	EIF-1A	0.9951	406	Seems to be required for maximal rate of protein biosynthesis	0.707617	407	423	Nucleus
COG001456	VtoE	5722	Trichomonas vaginalis	10239	Viruses	origin = virus	1.10375	86.4	root	APG9 AUTOPHAGY 9	0.9954	218	Involved in autophagy and cytoplasm to vacuole transport (Cvt) vesicle formation	0.660633	221	225	Lysosome/Vacuole
COG000001	VtoE	5722	Trichomonas vaginalis	10501	Phycodnaviridae	origin = eukaryotic	1.50278	80.2	86.1	SERINE/THREONINE-PROTEIN KINASE	0.2995	16718	protein serine/threonine kinase activity	0.191391	17075	17289	Cytoplasm
COG000387	VtoE	5722	Trichomonas vaginalis	455363	unclassified Phycodnaviridae	origin = eukaryotic	1.10328	83.1	90.3	DNA-DIRECTED RNA POLYMERASES I, II, AND III SUBUNIT RPABC1	0.9977	426	DNA-dependent RNA polymerase catalyzes the transcription of DNA into RNA using the four ribonucleoside triphosphates as substrates	0.3312	625	639	Cytoplasm
COG000818	VtoE	5722	Trichomonas vaginalis	455363	unclassified Phycodnaviridae	origin = unkn	1.36296	97.9	81.7	EUKARYOTIC TRANSLATION INITIATION FACTOR 2-ALPHA KINASE EIF2-ALPHA KINASE -RELATED	0.9694	359	Protein tyrosine kinase	0.206989	372	378	Cytoplasm
COG000488	VtoE	5722	Trichomonas vaginalis	549779	Mimiviridae	origin = eukaryotic	0.778413	90.9	90.8	EUKARYOTIC TRANSLATION INITIATION FACTOR	1	273	translation initiation factor activity	0.919643	560	562	Nucleus
COG000005	VtoE	5722	Trichomonas vaginalis	2732007	Nucleocytoviricota	origin = eukaryotic, cousin unclear	1.05585	84.6	88.5	DRAB5-RELATED	0.2327	10584	Rab subfamily of small GTPases	0.149102	10798	10903	Unknown
COG000402	VtoE	5722	Trichomonas vaginalis	2732007	Nucleocytoviricota	origin = virus	1.70978	93	82.6	RBR FAMILY RING FINGER AND IBR DOMAIN-CONTAINING	0.984	250	N-methyltransferase activity	0.799636	549	629	Nucleus
COG003430	VtoE	5722	Trichomonas vaginalis	2732007	Nucleocytoviricota	origin = virus	0.587122	89.2	81	UBIQUITIN CARBOXYL-TERMINAL HYDROLASE	0.9839	62	Belongs to the peptidase C19 family	0.603175	63	68	Cytoplasm
COG004036	VtoE	5722	Trichomonas vaginalis	2732007	Nucleocytoviricota	origin = eukaryotic	1.19527	root	root	GTPASE-ACTIVATING PROTEIN	1	1	negative regulation of Ras protein signal transduction	1	2	46	Endoplasmic_reticulum
COG000005	VtoE	5722	Trichomonas vaginalis	Weakly supported	Weakly supported	origin = eukaryotic, long branching recipient	1.69892	93.9	87.6	DRAB5-RELATED	0.2327	10584	Rab subfamily of small GTPases	0.149102	10798	10903	Unknown
COG000089	VtoE	5722	Trichomonas vaginalis	Weakly supported	Weakly supported	origin = eukaryotic, long branching recipient	1.9097	89.8	82.7	ATP-DEPENDENT RNA AND DNA HELICASE	0.965	1228	DNA-dependent ATPase and 3'-5' DNA helicase that may be involved in repair of stalled replication forks	0.292776	1578	1607	Cytoplasm
COG000114	VtoE	5722	Trichomonas vaginalis	Weakly supported	Weakly supported	origin = prokaryotic, long branching recipient	2.28709	97.1	91.1	RIBONUCLEASE III	0.5405	840	rRNA catabolic process	0.737232	1351	1392	Unknown
COG000162	VtoE	5722	Trichomonas vaginalis	Weakly supported	Weakly supported	origin = eukaryotic, long branching recipient	1.63493	95.5	81.7	UBIQUITIN CARBOXYL-TERMINAL HYDROLASE	1	1081	Belongs to the peptidase C19 family	0.372835	1097	1116	Unknown
COG000420	VtoE	5722	Trichomonas vaginalis	Weakly supported	Weakly supported	origin = eukaryotic, long branching donor	0.325622	81.8	82.9	WD-REPEAT PROTEIN INTERACTING WITH PHOSPHOINOSIDES WIPI -RELATED	0.9951	608	WD40 repeats	0.288779	606	616	Cytoplasm
COG001402	VtoE	5722	Trichomonas vaginalis	Weakly supported	Weakly supported	origin = virus, long branching recipient	2.46297	97.5	99.7	FAMILY PROTEIN, PUTATIVE-RELATED	1	31	chitin catabolic process	0.578723	235	235	Mitochondrion
COG001793	VtoE	5722	Trichomonas vaginalis	Weakly supported	Weakly supported	origin = prokaryotic, long branching recipient	2.76539	80.1	97.2	PROTEASE S51 ALPHA-ASPARTYL DIPEPTIDASE	1	33	Belongs to the peptidase S51 family	0.743169	183	184	Cytoplasm
COG003430	VtoE	5722	Trichomonas vaginalis	Weakly supported	Weakly supported	origin = virus, long branching recipient	2.31414	root	root	UBIQUITIN CARBOXYL-TERMINAL HYDROLASE	0.9839	62	Belongs to the peptidase C19 family	0.603175	63	68	Cytoplasm
COG005532	VtoE	5722	Trichomonas vaginalis	Weakly supported	Weakly supported	origin = virus, sister unclear	1.48465	83.5	root	RING ZINC FINGER PROTEIN-RELATED	0.3846	13	RING-like zinc finger	0.285714	14	18	Endoplasmic_reticulum
COG005829	VtoE	5722	Trichomonas vaginalis	Weakly supported	Weakly supported	origin = virus, long branching recipient	2.47497	99.2	92.3	ANKYRIN REPEAT-CONTAINING PROTEIN DDB_G0279043	0.375	16	aspartic-type endopeptidase activity	0.933333	15	16	Unknown
COG000509	VtoE	10228	Trichoplax adhaerens	10239	Viruses	origin = virus	0.673268	root	root	No annotation	0	0	ATPase activity, uncoupled	1	538	546	Unknown
COG003627	VtoE	10228	Trichoplax adhaerens	10239	Viruses	origin = virus	2.17115	81.8	84.5	No annotation	0	0	no annotation	0	0	61	Unknown
COG005307	VtoE	10228	Trichoplax adhaerens	549779	Mimiviridae	origin = virus	2.04291	96.3	91.2	UNCHARACTERIZED	1	20	tRNA guanylyltransferase activity	0.944444	18	21	Mitochondrion
COG000048	VtoE	10228	Trichoplax adhaerens	1675601	Caulobacter phage Seuss	origin = unkn	0.177451	99.6	97.9	RIBONUCLEOSIDE-DIPHOSPHATE REDUCTASE LARGE CHAIN	0.9955	2244	Provides the precursors necessary for DNA synthesis	0.506765	2439	2481	Cytoplasm
COG000235	VtoE	4572	Triticum urartu	10239	Viruses	origin = virus	0.026477	root	root	PHOTOSYSTEM II PROTEIN D1	1	844	Photosystem II (PSII) is a light-driven water plastoquinone oxidoreductase that uses light energy to abstract electrons from H(2)O, generating O(2) and a proton gradient subsequently used for ATP formation	0.519651	916	916	Unknown
COG000235	VtoE	4572	Triticum urartu	10239	Viruses	origin = virus	2.9926e-06	root	root	PHOTOSYSTEM II PROTEIN D1	1	844	Photosystem II (PSII) is a light-driven water plastoquinone oxidoreductase that uses light energy to abstract electrons from H(2)O, generating O(2) and a proton gradient subsequently used for ATP formation	0.519651	916	916	Unknown
COG000251	VtoE	5690	Trypanosoma	Weakly supported	Weakly supported	origin = virus, long branching recipient	0.733955	82.8	80.1	DNA-DIRECTED RNA POLYMERASES I, II, AND III SUBUNIT RPABC5 FAMILY MEMBER	1	685	RNA polymerases N / 8 kDa subunit	0.328496	758	878	Unknown
COG000609	VtoE	185431	Trypanosoma brucei brucei TREU927	Weakly supported	Weakly supported	origin = virus, long branching recipient	2.11263	93	97.7	BCS1 AAA-TYPE ATPASE	1	442	ATPase activity	0.522422	446	481	Unknown
COG007253	VtoE	237631	Ustilago maydis 521	2023203	Pithoviridae	origin = virus	1.32133	85.9	root	3-5 EXONUCLEASE	1	6	3'-5' exonuclease	0.571429	7	9	Unknown
COG001408	VtoE	237631	Ustilago maydis 521	Weakly supported	Weakly supported	origin = eukaryotic, long branching recipient	2.3029	86.5	91	MRNA GUANINE-7- METHYLTRANSFERASE	1	226	Belongs to the class I-like SAM-binding methyltransferase superfamily	0.586207	232	234	Nucleus
COG000048	VtoE	33090	Viridiplantae	Weakly supported	Weakly supported	origin = unkn, long branching recipient	1.09053	84.8	95.2	RIBONUCLEOSIDE-DIPHOSPHATE REDUCTASE LARGE CHAIN	0.9955	2244	Provides the precursors necessary for DNA synthesis	0.506765	2439	2481	Unknown
COG000235	VtoE	29760	Vitis vinifera	10239	Viruses	origin = virus	2.155e-06	root	root	PHOTOSYSTEM II PROTEIN D1	1	844	Photosystem II (PSII) is a light-driven water plastoquinone oxidoreductase that uses light energy to abstract electrons from H(2)O, generating O(2) and a proton gradient subsequently used for ATP formation	0.519651	916	916	Cell_membrane
COG000038	VtoE	29760	Vitis vinifera	Weakly supported	Weakly supported	origin = unkn, long branching recipient	2.30827	97.6	80.3	DNA-DIRECTED RNA POLYMERASE	0.9996	2582	DNA-dependent RNA polymerase catalyzes the transcription of DNA into RNA using the four ribonucleoside triphosphates as substrates	0.704619	2793	2889	Mitochondrion
COG000069	VtoE	29760	Vitis vinifera	Weakly supported	Weakly supported	origin = virus, long branching recipient	0.861801	85.7	88.3	ENZYMATIC POLYPROTEIN-RELATED	0.9934	1372	polyprotein	0.647557	1535	1954	Nucleus
COG000235	VtoE	29760	Vitis vinifera	Weakly supported	Weakly supported	origin = virus, long branching recipient	0.0784407	root	root	PHOTOSYSTEM II PROTEIN D1	1	844	Photosystem II (PSII) is a light-driven water plastoquinone oxidoreductase that uses light energy to abstract electrons from H(2)O, generating O(2) and a proton gradient subsequently used for ATP formation	0.519651	916	916	Unknown
COG000421	VtoE	29760	Vitis vinifera	Weakly supported	Weakly supported	origin = eukaryotic, long branching recipient	2.86818	89.7	87.7	AN1-TYPE ZINC FINGER PROTEIN	0.9889	542	AN1-like Zinc finger	0.163904	543	616	Unknown
COG001207	VtoE	29760	Vitis vinifera	Weakly supported	Weakly supported	origin = eukaryotic, long branching recipient	3.5095	80.2	80.1	PHOSPHATIDYLSERINE DECARBOXYLASE	0.9902	102	Catalyzes the formation of phosphatidylethanolamine (PtdEtn) from phosphatidylserine (PtdSer)	0.603704	270	272	Unknown
COG006620	VtoE	29760	Vitis vinifera	Weakly supported	Weakly supported	origin = virus, sister unclear	1.67293	84.1	root	E3 UBIQUITIN-PROTEIN LIGASE PRAJA	0.4444	9	ubiquitin-protein transferase activity	0.333333	6	11	Cytoplasm
COG001031	VtoE	1169540	Vitrella brassicaformis CCMP3155	10239	Viruses	origin = virus, cousin unclear	0.562771	84.3	80.4	BLR8090 PROTEIN	1	1	regulation of transcription, DNA-dependent	0.39521	167	314	Mitochondrion
COG000032	VtoE	1169540	Vitrella brassicaformis CCMP3155	455363	unclassified Phycodnaviridae	origin = unkn	1.16622	81.5	90.5	THIOREDOXIN	0.4056	1383	Belongs to the thioredoxin family	0.394606	3226	3257	Cell_membrane
COG000209	VtoE	1169540	Vitrella brassicaformis CCMP3155	455363	unclassified Phycodnaviridae	origin = eukaryotic	0.712061	97.9	89.9	ALPHA-KETOGLUTARATE-DEPENDENT DIOXYGENASE ALKB HOMOLOG 3	0.6376	356	2OG-Fe(II) oxygenase superfamily	0.391032	959	973	Nucleus
COG000523	VtoE	1169540	Vitrella brassicaformis CCMP3155	549779	Mimiviridae	origin = eukaryotic, cousin unclear	1.18307	96.1	87.8	RIBONUCLEASE H1	1	267	Endonuclease that specifically degrades the RNA of RNA- DNA hybrids	0.740602	532	536	Cytoplasm
COG000838	VtoE	1169540	Vitrella brassicaformis CCMP3155	985780	unclassified Mimiviridae	origin = prokaryotic	0.50311	91	89.9	PHENYLALANINE--TRNA LIGASE, MITOCHONDRIAL	1	217	Ferredoxin-fold anticodon binding domain	0.479893	373	373	Cytoplasm
COG001593	VtoE	1169540	Vitrella brassicaformis CCMP3155	2506608	Mimivirus LCMiAC01	origin = eukaryotic	0.225167	80.3	93.8	UNNAMED PRODUCT	0.8598	107	repeat protein	0.35	160	206	Cytoplasm
COG003349	VtoE	1169540	Vitrella brassicaformis CCMP3155	2732007	Nucleocytoviricota	origin = virus, cousin unclear	0.472302	87.6	83.4	ALPHA/BETA-HYDROLASES SUPERFAMILY PROTEIN	0.9538	65	Lipase (class 3)	0.761194	67	73	Unknown
COG007629	VtoE	1169540	Vitrella brassicaformis CCMP3155	2732523	Megaviricetes	origin = virus	1.9042	97.4	root	No annotation	0	0	no annotation	0	0	8	Unknown
COG000048	VtoE	1169540	Vitrella brassicaformis CCMP3155	Weakly supported	Weakly supported	origin = unkn, long branching recipient	0.756281	96.8	86.5	RIBONUCLEOSIDE-DIPHOSPHATE REDUCTASE LARGE CHAIN	0.9955	2244	Provides the precursors necessary for DNA synthesis	0.506765	2439	2481	Cytoplasm
COG000380	VtoE	1169540	Vitrella brassicaformis CCMP3155	Weakly supported	Weakly supported	origin = virus, sister unclear	1.36212	87.4	root	No annotation	0	0	Predicted membrane protein (DUF2177)	0.735537	242	649	Cell_membrane
COG000651	VtoE	1169540	Vitrella brassicaformis CCMP3155	Weakly supported	Weakly supported	origin = virus, long branching recipient	2.07359	90.4	root	BETA-1,4-GALACTOSYLTRANSFERASE	0.9977	436	N-terminal region of glycosyl transferase group 7	0.324201	438	456	Unknown
COG001939	VtoE	1169540	Vitrella brassicaformis CCMP3155	Weakly supported	Weakly supported	origin = eukaryotic, long branching recipient	1.91912	84.7	88.1	No annotation	0	0	Cytidine and deoxycytidylate deaminase zinc-binding region	0.909091	11	171	Nucleus
COG002361	VtoE	1169540	Vitrella brassicaformis CCMP3155	Weakly supported	Weakly supported	origin = unkn, long branching recipient	2.36192	93	80.5	ENDONUCLEASE/EXONUCLEASE/PHOSPHATASE FAMILY PROTEIN (AFU_ORTHOLOGUE AFUA_3G09210)	0.984	125	Endonuclease exonuclease phosphatase	0.951049	143	146	Extracellular
COG004033	VtoE	3065	Volvocaceae	Weakly supported	Weakly supported	origin = virus, long branching recipient	1.96247	90.5	84.1	ALPHA-1,6-MANNOSYLTRANSFERASE MNN11-RELATED	1	44	galactosyl transferase GMA12/MNN10 family	0.6	45	46	Cytoplasm
COG002846	VtoE	3068	Volvox carteri f. nagariensis	455363	unclassified Phycodnaviridae	origin = virus	1.3052	88.1	80.8	No annotation	0	0	no annotation	0	0	103	Cell_membrane
COG000148	VtoE	8355	Xenopus laevis	2732007	Nucleocytoviricota	origin = eukaryotic	1.10826	91.9	80.7	NITRIC OXIDE SYNTHASE-RELATED	0.9598	969	FAD binding domain	0.181102	1143	1160	Unknown
COG000466	VtoE	8355	Xenopus laevis	Weakly supported	Weakly supported	origin = unkn, long branching recipient	2.64211	86.3	99.9	POL PROTEIN	0.7067	491	genomic stop codons	0.435897	546	576	Unknown
COG000235	VtoE	4577	Zea mays	10239	Viruses	origin = virus	2.6335e-06	root	root	PHOTOSYSTEM II PROTEIN D1	1	844	Photosystem II (PSII) is a light-driven water plastoquinone oxidoreductase that uses light energy to abstract electrons from H(2)O, generating O(2) and a proton gradient subsequently used for ATP formation	0.519651	916	916	Lysosome/Vacuole
COG000038	VtoE	4577	Zea mays	Weakly supported	Weakly supported	origin = eukaryotic, long branching recipient	1.17445	95.9	100	DNA-DIRECTED RNA POLYMERASE	0.9996	2582	DNA-dependent RNA polymerase catalyzes the transcription of DNA into RNA using the four ribonucleoside triphosphates as substrates	0.704619	2793	2889	Unknown
COG000484	unkn	1257118	Acanthamoeba castellanii str. Neff	10239	Viruses	NA	1.03022	100	98.3	FATTY ACID DESATURASE 2	1	224	Fatty acid desaturase	0.389587	557	564	Endoplasmic_reticulum
COG000516	unkn	1257118	Acanthamoeba castellanii str. Neff	10239	Viruses	NA	0.562456	86.4	82.8	CYTOSINE DEAMINASE FAMILY MEMBER	0.8077	52	Domain of unknown function (DUF1768)	0.526316	532	539	Cytoplasm
COG006207	unkn	1257118	Acanthamoeba castellanii str. Neff	10239	Viruses	NA	1.61278	98.5	root	No annotation	0	0	no annotation	0	0	14	Unknown
COG005545	unkn	1257118	Acanthamoeba castellanii str. Neff	10260	Avipoxvirus	NA	1.77148	80.9	root	ANKYRIN REPEAT-CONTAINING PROTEIN DDB_G0279043	0.5625	16	aspartic-type endopeptidase activity	0.75	16	18	Nucleus
COG002345	unkn	1257118	Acanthamoeba castellanii str. Neff	12429	unclassified viruses	NA	0.696318	90.3	92.9	QUINOPROTEIN ALCOHOL DEHYDROGENASE (CYTOCHROME C)	1	60	PQQ enzyme repeat	0.434483	145	146	Extracellular
COG000412	unkn	1257118	Acanthamoeba castellanii str. Neff	455363	unclassified Phycodnaviridae	NA	1.43549	99.7	90	XYLOSE ISOMERASE	0.764	250	Patatin-like phospholipase	0.507223	623	624	Cytoplasm
COG000040	unkn	1257118	Acanthamoeba castellanii str. Neff	654926	Ectocarpus siliculosus virus 1 (isolate Kaikoura)	NA	0.789081	92.6	93.6	TWO-COMPONENT HISTIDINE KINASE	0.4898	1374	PhoQ Sensor	0.307939	2809	2838	Cytoplasm
COG004271	unkn	1257118	Acanthamoeba castellanii str. Neff	985780	unclassified Mimiviridae	NA	1.30848	84.2	87	SUPERFAMILY HYDROLASE, PUTATIVE (AFU_ORTHOLOGUE AFUA_1G03035)-RELATED	1	36	Metal dependent phosphohydrolases with conserved 'HD' motif	0.733333	15	40	Cytoplasm
COG002763	unkn	1257118	Acanthamoeba castellanii str. Neff	1513234	Cafeteriavirus	NA	1.46506	94.8	92.2	E3 UBIQUITIN-PROTEIN LIGASE TRIM36-RELATED	0.5789	38	Fibronectin type III domain	0.592233	103	109	Cytoplasm
COG000010	unkn	1257118	Acanthamoeba castellanii str. Neff	1605721	Pandoravirus inopinatum	NA	0.164232	94.4	98.5	SERINE/THREONINE-PROTEIN KINASE TNNI3K-RELATED	0.2795	7095	protein kinase activity	0.145963	7221	7300	Unknown
COG001980	unkn	1257118	Acanthamoeba castellanii str. Neff	2060084	Pandoravirus	NA	0.794965	100	85.8	TRANSPOSASE	0.9583	48	Putative transposase DNA-binding domain	0.351724	145	167	Nucleus
COG001980	unkn	1257118	Acanthamoeba castellanii str. Neff	2060084	Pandoravirus	NA	0.632851	100	85.8	TRANSPOSASE	0.9583	48	Putative transposase DNA-binding domain	0.351724	145	167	Extracellular
COG000926	unkn	1257118	Acanthamoeba castellanii str. Neff	2080449	Acanthamoeba castellanii medusavirus	NA	0.376273	99.8	95.8	CHROMOSOME TRANSMISSION FIDELITY FACTOR 18	1	314	Replication factor RFC1 C terminal domain	0.227405	343	346	Nucleus
COG001173	unkn	1257118	Acanthamoeba castellanii str. Neff	2080449	Acanthamoeba castellanii medusavirus	NA	0.744105	100	94.7	SERINE/THREONINE-PROTEIN KINASE TNNI3K-RELATED	0.7816	261	protein serine/threonine kinase activity	0.722222	270	281	Unknown
COG002265	unkn	1257118	Acanthamoeba castellanii str. Neff	2080449	Acanthamoeba castellanii medusavirus	NA	0.862485	91.8	95.6	NUCLEOSIDE DIPHOSPHATE KINASE, CYTOSOLIC	0.4286	7	UTP biosynthetic process	0.647059	17	151	Endoplasmic_reticulum
COG008317	unkn	1257118	Acanthamoeba castellanii str. Neff	2080449	Acanthamoeba castellanii medusavirus	NA	0.348915	95.8	root	PROTEIN DISULFIDE-ISOMERASE A6	1	1	Protein disulfide isomerase	0.5	2	6	Unknown
COG000113	unkn	1257118	Acanthamoeba castellanii str. Neff	2506605	Marseillevirus LCMAC201	NA	2.3413e-06	80.6	88.6	UBIQUITIN	0.9609	1279	ubiquitin	0.414104	1333	1402	Unknown
COG000014	unkn	1257118	Acanthamoeba castellanii str. Neff	Weakly supported	Weakly supported	long branching recipient	2.16487	92.3	98.2	DNAJ HOMOLOG SUBFAMILY C MEMBER	0.3541	3253	ATP binding to DnaK triggers the release of the substrate protein, thus completing the reaction cycle	0.315643	5747	5826	Nucleus
COG000145	unkn	1257118	Acanthamoeba castellanii str. Neff	Weakly supported	Weakly supported	long branching recipient	3.08352	96.8	root	BAND 7 PROTEIN-RELATED	0.5672	610	prohibitin homologues	0.250845	1184	1187	Cytoplasm
COG000615	unkn	1257118	Acanthamoeba castellanii str. Neff	Weakly supported	Weakly supported	long branching recipient	2.05915	91.8	86.6	ADIPOR/PROGESTIN RECEPTOR-RELATED	0.9979	473	Haemolysin-III related	0.409283	474	478	Unknown
COG000721	unkn	7159	Aedes aegypti	Weakly supported	Weakly supported	long branching donor	1.00109	99.6	86.7	No annotation	0	0	Rhabdovirus nucleocapsid protein	0.971223	417	419	Cytoplasm
COG001232	unkn	7159	Aedes aegypti	Weakly supported	Weakly supported	long branching recipient	2.5337	89.6	97.2	PUTATIVE PHOSPHOTRANSFERASE	1	22	Removes the 2'-phosphate from RNA via an intermediate in which the phosphate is ADP-ribosylated by NAD followed by a presumed transesterification to release the RNA and generate ADP- ribose 1''-2''-cyclic phosphate (APPR P)	0.794007	267	267	Unknown
COG000014	unkn	396360	Aiptasia sp. MRG-2006	Weakly supported	Weakly supported	long branching donor	0.83623	81.2	81.9	DNAJ HOMOLOG SUBFAMILY C MEMBER	0.3541	3253	ATP binding to DnaK triggers the release of the substrate protein, thus completing the reaction cycle	0.315643	5747	5826	Unknown
COG001280	unkn	2925	Alexandrium catenella	10239	Viruses	NA	0.499868	89.5	88.8	GTP-BINDING PROTEIN ENGB-RELATED	1	1	MazG nucleotide pyrophosphohydrolase domain	0.40625	256	257	Unknown
COG006835	unkn	2925	Alexandrium catenella	196894	unclassified Siphoviridae	NA	1.91013	99.5	root	VITAMIN B12-DEPENDENT RIBONUCLEOTIDE REDUCTASE	1	5	ribonucleoside-diphosphate reductase activity, thioredoxin disulfide as acceptor	0.3	10	10	Cytoplasm
COG002682	unkn	2925	Alexandrium catenella	Weakly supported	Weakly supported	long branching recipient	2.36217	82.4	97.1	UNCHARACTERIZED	1	87	PI-PLC X domain-containing protein	0.641026	117	117	Cytoplasm
COG000355	unkn	33630	Alveolata	10239	Viruses	NA	0.32338	100	86	UDP-GLUCURONIC ACID DECARBOXYLASE-RELATED	0.891	422	UDP-glucuronate decarboxylase activity	0.121302	676	686	Extracellular
COG003403	unkn	13333	Amborella trichopoda	343865	unclassified Mitovirus	NA	1.54286	89.5	99.9	PTHR34456	1	64	BEST Arabidopsis thaliana protein match is Mitovirus RNA-dependent RNA polymerase (TAIR	0.515152	66	70	Mitochondrion
COG000816	unkn	13333	Amborella trichopoda	Weakly supported	Weakly supported	long branching recipient	2.2802	88.9	94.8	39S RIBOSOMAL PROTEIN L12	1	225	Forms part of the ribosomal stalk which helps the ribosome interact with GTP-bound translation factors	0.415344	378	379	Unknown
COG002793	unkn	1775427	Amoebophrya sp. AT5.2	10487	Iridovirus	NA	1.53672	81.5	84.3	LIPOPOLYSACCHARIDE CHOLINEPHOSPHOTRANSFERASE LICD	0.8095	63	LicD family	0.525253	99	107	Unknown
COG007339	unkn	1775427	Amoebophrya sp. AT5.2	346673	Coccolithovirus	NA	0.452088	85.9	80.1	No annotation	0	0	no annotation	0	0	9	Cytoplasm
COG006306	unkn	1775427	Amoebophrya sp. AT5.2	2169651	Anatolevirus	NA	3.04255	90.2	root	SLL1193 PROTEIN	1	3	HNH endonuclease	0.583333	12	13	Nucleus
COG000809	unkn	1775427	Amoebophrya sp. AT5.2	2506592	Pithovirus LCPAC202	NA	0.813623	91.6	91.5	MACROCIN O-METHYLTRANSFERASE	0.98	100	Macrocin-O-methyltransferase (TylF)	0.815303	379	382	Unknown
COG001976	unkn	1775427	Amoebophrya sp. AT5.2	2732523	Megaviricetes	NA	1.61084	95	83.5	UDP-N-ACETYLGLUCOSAMINE 4,6-DEHYDRATASE	1	17	Polysaccharide biosynthesis protein	0.556886	167	167	Cytoplasm
COG000098	unkn	1775427	Amoebophrya sp. AT5.2	2732555	Pimascovirales	NA	1.04865	85.4	85.3	DUAL SPECIFICITY PROTEIN PHOSPHATASE	0.3823	1512	Dual specificity phosphatase, catalytic domain	0.230013	1526	1556	Nucleus
COG000003	unkn	1775427	Amoebophrya sp. AT5.2	Weakly supported	Weakly supported	long branching recipient	0.763648	89.1	91.2	ATP-DEPENDENT RNA HELICASE	0.4875	2482	RNA-protein covalent cross-linking	0.962677	11387	12749	Cytoplasm
COG000204	unkn	1775427	Amoebophrya sp. AT5.2	Weakly supported	Weakly supported	long branching recipient	1.02503	83	84.4	NUCLEOSIDE DIPHOSPHATE KINASE	0.934	591	Major role in the synthesis of nucleoside triphosphates other than ATP	0.413374	987	987	Unknown
COG000493	unkn	1775427	Amoebophrya sp. AT5.2	Weakly supported	Weakly supported	long branching recipient	1.13722	98	84.3	PROLIFERATING CELL NUCLEAR ANTIGEN	1	376	This protein is an auxiliary protein of DNA polymerase delta and is involved in the control of eukaryotic DNA replication by increasing the polymerase's processibility during elongation of the leading strand	0.427536	552	558	Cytoplasm
COG005289	unkn	400682	Amphimedon queenslandica	12429	unclassified viruses	NA	1.65089	80.1	root	ANKYRIN REPEAT, PH AND SEC7 DOMAIN CONTAINING PROTEIN SECG-RELATED	0.25	12	Ankyrin repeat	0.384615	13	21	Cytoplasm
COG000516	unkn	400682	Amphimedon queenslandica	455363	unclassified Phycodnaviridae	NA	0.324544	80.9	90.5	CYTOSINE DEAMINASE FAMILY MEMBER	0.8077	52	Domain of unknown function (DUF1768)	0.526316	532	539	Nucleus
COG000972	unkn	400682	Amphimedon queenslandica	2732523	Megaviricetes	NA	0.875114	84.4	96.3	CYSTEINE PROTEASE FAMILY C1-RELATED	0.9855	69	Papain family cysteine protease	0.321981	323	333	Nucleus
COG000327	unkn	59799	Angomonas deanei	Weakly supported	Weakly supported	long branching recipient	1.664	86.9	87.2	METACASPASE-4	0.9935	619	Caspase domain	0.455571	709	725	Nucleus
COG000113	unkn	307972	Apostichopus japonicus	10239	Viruses	NA	0.522442	83.7	82.8	UBIQUITIN	0.9609	1279	ubiquitin	0.414104	1333	1402	Cytoplasm
COG000433	unkn	307972	Apostichopus japonicus	552509	Leptopilina boulardi filamentous virus	NA	0.931509	96.3	80.5	INHIBITOR OF APOPTOSIS	0.9693	587	Inhibitor of Apoptosis domain	0.256711	596	604	Nucleus
COG000195	unkn	3702	Arabidopsis thaliana	Weakly supported	Weakly supported	long branching recipient	1.64814	93.8	root	URACIL-DNA GLYCOSYLASE	0.9941	847	Excises uracil residues from the DNA which can arise as a result of misincorporation of dUMP residues by DNA polymerase or due to deamination of cytosine	0.505976	1004	1012	Plastid
COG000938	unkn	510516	Aspergillus oryzae RIB40	10239	Viruses	NA	0.46537	82.6	84.8	PTHR35596	0.9675	154	Uncharacterized protein conserved in bacteria (DUF2263)	0.957704	331	343	Nucleus
COG000749	unkn	510516	Aspergillus oryzae RIB40	1977640	Klosneuvirus KNV1	NA	0.461655	98.5	85.4	NITROGEN METABOLITE REPRESSION PROTEIN NMRA FAMILY MEMBER	0.9872	156	NmrA-like family	0.528678	401	403	Cytoplasm
COG001059	unkn	510516	Aspergillus oryzae RIB40	Weakly supported	Weakly supported	long branching recipient	2.18535	93.7	97.6	SHORT-CHAIN DEHYDROGENASE/REDUCTASE	0.9867	150	short chain dehydrogenase	0.528053	303	306	Cytoplasm
COG005113	unkn	510516	Aspergillus oryzae RIB40	Weakly supported	Weakly supported	long branching recipient	2.96288	98.3	root	No annotation	0	0	no annotation	0	0	24	Cytoplasm
COG000021	unkn	44056	Aureococcus anophagefferens	455363	unclassified Phycodnaviridae	NA	0.411546	99.5	87.2	CYSTEINE PROTEASE FAMILY C1-RELATED	0.9951	3849	Belongs to the peptidase C1 family	0.410457	4093	4142	Extracellular
COG000924	unkn	44056	Aureococcus anophagefferens	455363	unclassified Phycodnaviridae	NA	0.110999	95.1	90.4	TRANSLATION INITIATION FACTOR 5A FAMILY MEMBER	0.9911	336	eukaryotic translation initiation factor	0.467647	340	347	Cytoplasm
COG004971	unkn	44056	Aureococcus anophagefferens	455363	unclassified Phycodnaviridae	NA	0.282674	91.8	90.5	TPR REPEAT CONTAINING PROTEIN	1	1	positive regulation of catalytic activity in other organism involved in symbiotic interaction	1	2	26	Extracellular
COG008051	unkn	44056	Aureococcus anophagefferens	455363	unclassified Phycodnaviridae	NA	0.287831	83.4	root	No annotation	0	0	Prolyl 4-hydroxylase alpha subunit homologues	1	1	7	Cytoplasm
COG000014	unkn	44056	Aureococcus anophagefferens	Weakly supported	Weakly supported	long branching recipient	1.4429	83.6	83.2	DNAJ HOMOLOG SUBFAMILY C MEMBER	0.3541	3253	ATP binding to DnaK triggers the release of the substrate protein, thus completing the reaction cycle	0.315643	5747	5826	Extracellular
COG000350	unkn	44056	Aureococcus anophagefferens	Weakly supported	Weakly supported	long branching recipient	2.17959	82.9	87.8	NUCLEOTIDE-SUGAR TRANSMEMBRANE TRANSPORTER	0.997	663	pyrimidine nucleotide-sugar transmembrane transporter activity	0.303571	672	688	Unknown
COG001462	unkn	2836	Bacillariophyta	Weakly supported	Weakly supported	long branching donor	0.503228	88.4	83.2	OVARIAN-SPECIFIC SERINE/THREONINE-PROTEIN KINASE LOK-RELATED	0.8227	220	protein serine/threonine kinase activity	0.90583	223	224	Cytoplasm
COG000586	unkn	1525212	Bathycoccaceae	2732007	Nucleocytoviricota	NA	1.0551	90.9	root	PROLINE OXIDASE	0.997	331	Proline dehydrogenase	0.373444	482	492	Mitochondrion
COG000032	unkn	41875	Bathycoccus prasinos	2732523	Megaviricetes	NA	0.948769	87.5	83.8	THIOREDOXIN	0.4056	1383	Belongs to the thioredoxin family	0.394606	3226	3257	Mitochondrion
COG000523	unkn	684364	Batrachochytrium dendrobatidis JAM81	2732037	Pogseptimavirus	NA	0.664344	95.2	85.1	RIBONUCLEASE H1	1	267	Endonuclease that specifically degrades the RNA of RNA- DNA hybrids	0.740602	532	536	Cytoplasm
COG003841	unkn	684364	Batrachochytrium dendrobatidis JAM81	Weakly supported	Weakly supported	long branching recipient	3.11509	98.8	91.5	STEROL DESATURASE	0.7143	42	Belongs to the sterol desaturase family	0.632653	49	52	Endoplasmic_reticulum
COG001691	unkn	227086	Bigelowiella natans	10501	Phycodnaviridae	NA	1.22711	81.8	94.1	PTHR31252	1	119	Domain of unknown function (DUF4419)	0.994652	187	193	Unknown
COG000507	unkn	227086	Bigelowiella natans	12429	unclassified viruses	NA	0.971205	83.1	94.9	PROTEIN PHOSPHATASE 2C	0.9925	534	Stage II sporulation protein E (SpoIIE)	0.345018	542	547	Unknown
COG000036	unkn	227086	Bigelowiella natans	455363	unclassified Phycodnaviridae	NA	0.915795	86.4	90.8	PROTEIN PHOSPHATASE 2C	0.6993	2820	protein serine/threonine phosphatase activity	0.215374	2888	2939	Unknown
COG000488	unkn	227086	Bigelowiella natans	455363	unclassified Phycodnaviridae	NA	0.168252	89.4	88.4	EUKARYOTIC TRANSLATION INITIATION FACTOR	1	273	translation initiation factor activity	0.919643	560	562	Nucleus
COG000209	unkn	227086	Bigelowiella natans	1977640	Klosneuvirus KNV1	NA	0.571189	99.9	85.5	ALPHA-KETOGLUTARATE-DEPENDENT DIOXYGENASE ALKB HOMOLOG 3	0.6376	356	2OG-Fe(II) oxygenase superfamily	0.391032	959	973	Unknown
COG000113	unkn	227086	Bigelowiella natans	2023057	Orpheovirus IHUMI-LCC2	NA	0.103757	84.2	81.5	UBIQUITIN	0.9609	1279	ubiquitin	0.414104	1333	1402	Peroxisome
COG001544	unkn	227086	Bigelowiella natans	2506585	Pithovirus LCPAC001	NA	0.615115	91.8	99.1	PHYTANOYL-COA DIOXYGENASE-RELATED-RELATED	1	189	Phytanoyl-CoA dioxygenase (PhyH)	0.973404	188	213	Nucleus
COG001438	unkn	227086	Bigelowiella natans	2732007	Nucleocytoviricota	NA	1.16887	94.4	88.1	MANNOSYL PHOSPHORYLINOSITOL CERAMIDE SYNTHASE	1	181	Glycosyltransferase sugar-binding region containing DXD motif	0.502242	223	229	Extracellular
COG003515	unkn	227086	Bigelowiella natans	2732007	Nucleocytoviricota	NA	1.15209	91.8	88.5	No annotation	0	0	Alpha/beta hydrolase family	1	51	66	Extracellular
COG004265	unkn	227086	Bigelowiella natans	2732007	Nucleocytoviricota	NA	0.118897	100	root	CALPAIN	0.5	2	SET (Su(var)3-9, Enhancer-of-zeste, Trithorax) domain	1	35	40	Unknown
COG005099	unkn	227086	Bigelowiella natans	2732007	Nucleocytoviricota	NA	1.21288	84.5	94.7	No annotation	0	0	no annotation	0	0	24	Cytoplasm
COG004446	unkn	227086	Bigelowiella natans	2732523	Megaviricetes	NA	1.46317	91.7	87.6	SLR1338 PROTEIN	0.9655	29	von Willebrand factor (vWF) type A domain	0.5	8	36	Unknown
COG000121	unkn	227086	Bigelowiella natans	Weakly supported	Weakly supported	long branching recipient	1.71667	90.6	97.8	DNA POLYMERASE I	0.8711	380	In addition to polymerase activity, this DNA polymerase exhibits 5'-3' exonuclease activity	0.707478	1364	1366	Mitochondrion
COG000433	unkn	33213	Bilateria	10239	Viruses	NA	1.37513	80.4	94.9	INHIBITOR OF APOPTOSIS	0.9693	587	Inhibitor of Apoptosis domain	0.256711	596	604	Cytoplasm
COG000001	unkn	33213	Bilateria	Weakly supported	Weakly supported	long branching recipient	2.06679	86.1	85.2	SERINE/THREONINE-PROTEIN KINASE	0.2995	16718	protein serine/threonine kinase activity	0.191391	17075	17289	Unknown
COG000472	unkn	6526	Biomphalaria glabrata	10239	Viruses	NA	0.16506	99.5	99.2	CTP SYNTHASE	0.9976	413	Catalyzes the ATP-dependent amination of UTP to CTP with either L-glutamine or ammonia as the source of nitrogen	0.814159	565	572	Unknown
COG003609	unkn	6526	Biomphalaria glabrata	573012	Raphidovirus	NA	0.734941	88.6	84.7	MYOTROPHIN	0.4528	53	Ankyrin repeats (many copies)	0.303571	56	61	Cytoplasm
COG000004	unkn	6526	Biomphalaria glabrata	Weakly supported	Weakly supported	long branching recipient	2.21842	83.6	96.5	PTHR27007	0.0624	12203	Belongs to the protein kinase superfamily	0.172215	12316	12367	Cytoplasm
COG000758	unkn	6526	Biomphalaria glabrata	Weakly supported	Weakly supported	long branching recipient	1.95154	91.9	92.3	SPINSTER	1	169	sphingolipid transporter activity	0.187179	390	399	Extracellular
COG001104	unkn	6526	Biomphalaria glabrata	Weakly supported	Weakly supported	long branching recipient	1.60481	99.9	97.2	DNA GYRASE/TOPOISOMERASE SUBUNIT A	0.9857	140	A type II topoisomerase that negatively supercoils closed circular double-stranded (ds) DNA in an ATP-dependent manner to modulate DNA topology and maintain chromosomes in an underwound state	0.569966	293	294	Cytoplasm
COG000387	unkn	12968	Blastocystis hominis	10239	Viruses	NA	0.97776	82.7	90.3	DNA-DIRECTED RNA POLYMERASES I, II, AND III SUBUNIT RPABC1	0.9977	426	DNA-dependent RNA polymerase catalyzes the transcription of DNA into RNA using the four ribonucleoside triphosphates as substrates	0.3312	625	639	Unknown
COG000118	unkn	12968	Blastocystis hominis	10487	Iridovirus	NA	0.208193	96.7	94.1	HEAT SHOCK PROTEIN 90 FAMILY MEMBER	0.9975	1184	Hsp90 protein	0.25405	1358	1376	Cytoplasm
COG000019	unkn	12968	Blastocystis hominis	455363	unclassified Phycodnaviridae	NA	0.155006	98.1	90.5	HEAT SHOCK PROTEIN 70KDA	0.8288	3895	Belongs to the heat shock protein 70 family	0.27064	4530	4585	Cytoplasm
COG000032	unkn	75058	Bodo saltans	10239	Viruses	NA	1.24503	92.8	80.6	THIOREDOXIN	0.4056	1383	Belongs to the thioredoxin family	0.394606	3226	3257	Cytoplasm
COG000032	unkn	75058	Bodo saltans	10239	Viruses	NA	1.03355	85	80.6	THIOREDOXIN	0.4056	1383	Belongs to the thioredoxin family	0.394606	3226	3257	Nucleus
COG000593	unkn	75058	Bodo saltans	181086	Prymnesiovirus	NA	0.681429	94.5	84.7	WD REPEAT, SAM AND U-BOX DOMAIN-CONTAINING PROTEIN 1	0.7494	451	ubiquitin-protein transferase activity	0.326754	456	489	Cytoplasm
COG003384	unkn	75058	Bodo saltans	455363	unclassified Phycodnaviridae	NA	1.56165	90.6	root	No annotation	0	0	RNA ligase	0.588235	68	71	Unknown
COG000770	unkn	75058	Bodo saltans	2732007	Nucleocytoviricota	NA	0.841673	95	94.3	GLCNAC TRANSFERASE-RELATED	1	318	Glycosyltransferase (GlcNAc)	0.845758	389	396	Unknown
COG001991	unkn	9913	Bos taurus	10241	Chordopoxvirinae	NA	0.151852	97.2	82.4	C-TYPE LECTIN DOMAIN-CONTAINING PROTEIN 180	0.8896	163	carbohydrate binding	0.393939	165	166	Cell_membrane
COG000433	unkn	7739	Branchiostoma floridae	10239	Viruses	NA	0.536026	93.5	89	INHIBITOR OF APOPTOSIS	0.9693	587	Inhibitor of Apoptosis domain	0.256711	596	604	Unknown
COG003544	unkn	7739	Branchiostoma floridae	Weakly supported	Weakly supported	long branching recipient	3.51717	98.4	86.7	B-CELL RECEPTOR CD22	0.7	10	Immunoglobulin domain	0.647059	17	64	Unknown
COG002475	unkn	3708	Brassica napus	549779	Mimiviridae	NA	1.67014	80.8	88.4	GH10160P	0.6364	132	Ring finger protein	0.238462	130	136	Unknown
COG000032	unkn	6239	Caenorhabditis elegans	10239	Viruses	NA	0.747837	87.5	88.1	THIOREDOXIN	0.4056	1383	Belongs to the thioredoxin family	0.394606	3226	3257	Unknown
COG000314	unkn	6239	Caenorhabditis elegans	72201	Armadillidium vulgare iridescent virus	NA	0.513108	83.3	85.3	HISTONE H3	0.9324	740	protein heterodimerization activity	0.693767	738	752	Unknown
COG000125	unkn	6239	Caenorhabditis elegans	346673	Coccolithovirus	NA	0.773236	86.8	84.8	DEOXYCYTIDYLATE DEAMINASE-RELATED	0.9988	855	Cytidine and deoxycytidylate deaminase zinc-binding region	0.382065	1327	1337	Unknown
COG000188	unkn	6239	Caenorhabditis elegans	2732555	Pimascovirales	NA	0.916477	97.7	94.1	MATRIX METALLOPROTEINASE	0.9969	983	Belongs to the peptidase M10A family	0.355404	1027	1033	Unknown
COG000768	unkn	6239	Caenorhabditis elegans	Weakly supported	Weakly supported	long branching recipient	1.78113	90.6	84	DUAL SPECIFICITY PROTEIN PHOSPHATASE	0.9536	366	Belongs to the protein-tyrosine phosphatase family	0.211196	393	397	Unknown
COG001524	unkn	6239	Caenorhabditis elegans	Weakly supported	Weakly supported	long branching recipient	1.50168	88.7	87.9	DNA LIGASE 1/3 FAMILY MEMBER	1	210	DNA ligase (ATP) activity	0.666667	213	214	Nucleus
COG000014	unkn	237561	Candida albicans SC5314	10239	Viruses	NA	1.00764	97.2	84.8	DNAJ HOMOLOG SUBFAMILY C MEMBER	0.3541	3253	ATP binding to DnaK triggers the release of the substrate protein, thus completing the reaction cycle	0.315643	5747	5826	Endoplasmic_reticulum
COG000139	unkn	237561	Candida albicans SC5314	Weakly supported	Weakly supported	long branching recipient	1.03316	87	91.8	DTDP-D-GLUCOSE 4,6-DEHYDRATASE-RELATED	0.7699	969	dTDP-glucose 4,6-dehydratase activity	0.372171	1193	1220	Unknown
COG000113	unkn	595528	Capsaspora owczarzaki ATCC 30864	10239	Viruses	NA	0.747832	86.8	87.4	UBIQUITIN	0.9609	1279	ubiquitin	0.414104	1333	1402	Cytoplasm
COG004323	unkn	595528	Capsaspora owczarzaki ATCC 30864	2023203	Pithoviridae	NA	0.386004	82.6	86.3	LP07818P1	1	1	Domain of unknown function (DUF4326)	1	24	39	Nucleus
COG001134	unkn	595528	Capsaspora owczarzaki ATCC 30864	2487769	Homavirus sp.	NA	0.84588	96.1	86	SPHINGOSINE KINASE	0.963	27	Diacylglycerol kinase catalytic domain (presumed)	0.238754	289	289	Cytoplasm
COG000096	unkn	1054147	Cavenderia fasciculata SH3	455363	unclassified Phycodnaviridae	NA	1.29517	84.6	94.6	FATTY ACID SYNTHASE	0.5307	1255	polyketide synthase	0.101167	1542	1569	Cytoplasm
COG001431	unkn	1054147	Cavenderia fasciculata SH3	2732523	Megaviricetes	NA	1.21006	83.2	92.3	PUTATIVE PHOSPHOTRANSFERASE	0.9867	225	RNA 2'-phosphotransferase, Tpt1 / KptA family	0.350877	228	230	Mitochondrion
COG000593	unkn	3042	Chlamydomonadales	2732007	Nucleocytoviricota	NA	0.976861	85	84	WD REPEAT, SAM AND U-BOX DOMAIN-CONTAINING PROTEIN 1	0.7494	451	ubiquitin-protein transferase activity	0.326754	456	489	Unknown
COG001491	unkn	2511126	Chlorella clade	181083	Chlorovirus	NA	0.434603	84.6	82	BIFUNCTIONAL CHITINASE/LYSOZYME-RELATED	1	69	Glycosyl hydrolases family 18	0.26257	179	219	Plastid
COG000970	unkn	554065	Chlorella variabilis	Weakly supported	Weakly supported	long branching recipient	4.68039	99.5	95.5	UV-DAMAGE ENDONUCLEASE	1	178	UV-endonuclease UvdE	0.419453	329	335	Unknown
COG006450	unkn	1460289	Chrysochromulina tobinii	181085	Phaeovirus	NA	0.740352	96.4	root	WD40 REPEAT PROTEIN	0.5	4	PFAM WD domain, G-beta repeat	0.363636	11	12	Unknown
COG002567	unkn	1460289	Chrysochromulina tobinii	455363	unclassified Phycodnaviridae	NA	0.38975	99.8	100	RADICAL S-ADENOSYL METHIONINE DOMAIN-CONTAINING PROTEIN 2	1	54	Radical SAM superfamily	0.204724	127	127	Unknown
COG005748	unkn	1460289	Chrysochromulina tobinii	455363	unclassified Phycodnaviridae	NA	1.35636	84.8	root	No annotation	0	0	no annotation	0	0	17	Unknown
COG002524	unkn	1460289	Chrysochromulina tobinii	2732007	Nucleocytoviricota	NA	0.906348	96.5	84	SLL1456 PROTEIN-RELATED	1	41	Methyltransferase FkbM domain	0.396825	126	132	Unknown
COG000523	unkn	1460289	Chrysochromulina tobinii	Weakly supported	Weakly supported	long branching recipient	1.36056	90.6	92.2	RIBONUCLEASE H1	1	267	Endonuclease that specifically degrades the RNA of RNA- DNA hybrids	0.740602	532	536	Unknown
COG000113	unkn	5878	Ciliophora	10239	Viruses	NA	0.311876	83.7	82.8	UBIQUITIN	0.9609	1279	ubiquitin	0.414104	1333	1402	Unknown
COG000033	unkn	5878	Ciliophora	Weakly supported	Weakly supported	long branching donor	0.267675	83.1	91	ATP-BINDING CASSETTE SUB-FAMILY B	0.779	2769	ATPase activity, coupled to transmembrane movement of substances	0.229005	3096	3127	Mitochondrion
COG003377	unkn	7719	Ciona intestinalis	2732007	Nucleocytoviricota	NA	0.0167071	82.5	85.3	UBIQUITIN	0.9821	56	Ubiquitin family	0.25	68	71	Cytoplasm
COG005382	unkn	574566	Coccomyxa subellipsoidea C-169	1792032	Bacillus phage SP-15	NA	1.92598	82.4	86.4	SUGAR FERMENTATION STIMULATION PROTEIN A	1	4	Belongs to the SfsA family	0.55	20	20	Nucleus
COG001401	unkn	574566	Coccomyxa subellipsoidea C-169	2732007	Nucleocytoviricota	NA	1.41861	93.4	90.7	RHAMNAN SYNTHESIS F	1	20	Glycosyltransferase WbsX	0.846154	234	235	Unknown
COG000869	unkn	2692248	core chlorophytes	Weakly supported	Weakly supported	long branching donor	0.838957	85	85.2	MYOINOSITOL OXYGENASE	0.9876	241	Myo-inositol oxygenase	0.454039	359	363	Nucleus
COG000283	unkn	5806	Cryptosporidium	549779	Mimiviridae	NA	0.446326	90.3	82.8	UNCHARACTERIZED	0.9871	542	2OG-Fe(II) oxygenase superfamily	0.224905	787	801	Cytoplasm
COG000802	unkn	5806	Cryptosporidium	2487770	Hyperionvirus sp.	NA	0.372488	92.2	89.3	N-MYRISTOYL TRANSFERASE	0.9974	381	Adds a myristoyl group to the N-terminal glycine residue of certain cellular proteins	0.794271	384	387	Cytoplasm
COG000098	unkn	5806	Cryptosporidium	2732523	Megaviricetes	NA	0.902608	85	87.2	DUAL SPECIFICITY PROTEIN PHOSPHATASE	0.3823	1512	Dual specificity phosphatase, catalytic domain	0.230013	1526	1556	Unknown
COG000204	unkn	5806	Cryptosporidium	Weakly supported	Weakly supported	long branching donor	0.347226	89.1	80.6	NUCLEOSIDE DIPHOSPHATE KINASE	0.934	591	Major role in the synthesis of nucleoside triphosphates other than ATP	0.413374	987	987	Extracellular
COG006327	unkn	441375	Cryptosporidium muris RN66	2732007	Nucleocytoviricota	NA	1.02209	94.8	90.4	E3 UBIQUITIN-PROTEIN LIGASE MARCH6	0.3	10	The RING-variant domain is a C4HC3 zinc-finger like motif found in a number of cellular and viral proteins	0.636364	11	13	Cell_membrane
COG000003	unkn	441375	Cryptosporidium muris RN66	Weakly supported	Weakly supported	long branching recipient	0.985081	89.1	91.2	ATP-DEPENDENT RNA HELICASE	0.4875	2482	RNA-protein covalent cross-linking	0.962677	11387	12749	Cytoplasm
COG000658	unkn	353152	Cryptosporidium parvum Iowa II	985780	unclassified Mimiviridae	NA	1.74416	96.2	90.2	AT29763P-RELATED	0.7828	419	Domain of unknown function (DUF1977)	0.206977	430	450	Unknown
COG000003	unkn	353152	Cryptosporidium parvum Iowa II	Weakly supported	Weakly supported	long branching recipient	0.602868	97.1	80.4	ATP-DEPENDENT RNA HELICASE	0.4875	2482	RNA-protein covalent cross-linking	0.962677	11387	12749	Endoplasmic_reticulum
COG000036	unkn	483139	Cystoisospora suis	Weakly supported	Weakly supported	long branching recipient	1.71771	81	85.5	PROTEIN PHOSPHATASE 2C	0.6993	2820	protein serine/threonine phosphatase activity	0.215374	2888	2939	Unknown
COG000726	unkn	6669	Daphnia pulex	573012	Raphidovirus	NA	0.0783065	98.9	92.2	PROTEIN CBG23764	0.6794	340	phospholipid scrambling	0.328042	189	416	Cytoplasm
COG000688	unkn	33083	Dictyostelia	10239	Viruses	NA	0.379285	92.8	94.8	SER/THR PROTEIN PHOSPHATASE SUPERFAMILY (AFU_ORTHOLOGUE AFUA_1G14840)	1	272	Calcineurin-like phosphoesterase	0.356643	429	435	Cytoplasm
COG000782	unkn	33083	Dictyostelia	10239	Viruses	NA	0.402795	93.8	99.4	OS06G0652100 PROTEIN	1	327	Domain of unknown function (DUF2828)	0.884021	388	393	Cytoplasm
COG004285	unkn	33083	Dictyostelia	2023057	Orpheovirus IHUMI-LCC2	NA	0.338095	96.8	95.3	No annotation	0	0	no annotation	0	0	40	Nucleus
COG000682	unkn	33083	Dictyostelia	2487770	Hyperionvirus sp.	NA	0.316447	88.3	95.4	TATD FAMILY DEOXYRIBONUCLEASE	0.9613	284	TatD related DNase	0.41055	436	437	Cytoplasm
COG000805	unkn	33083	Dictyostelia	Weakly supported	Weakly supported	long branching donor	0.724035	94.8	91.1	CHITINASE	1	240	Glycosyl hydrolases family 18	0.454545	385	385	Cytoplasm
COG000958	unkn	33083	Dictyostelia	Weakly supported	Weakly supported	long branching recipient	1.83452	81.8	92.1	RECA	0.9892	185	Can catalyze the hydrolysis of ATP in the presence of single-stranded DNA, the ATP-dependent uptake of single-stranded DNA by duplex DNA, and the ATP-dependent hybridization of homologous single-stranded DNAs	0.548961	337	338	Mitochondrion
COG006454	unkn	2058949	Dictyosteliales	2732523	Megaviricetes	NA	0.521977	88.6	root	TRANSMEMBRANE PROTEIN-RELATED	1	9	Belongs to the BI1 family	0.5	12	12	Mitochondrion
COG000005	unkn	5786	Dictyostelium purpureum	2732523	Megaviricetes	NA	0.765327	80.8	89.3	DRAB5-RELATED	0.2327	10584	Rab subfamily of small GTPases	0.149102	10798	10903	Nucleus
COG003274	unkn	5786	Dictyostelium purpureum	2732523	Megaviricetes	NA	1.47364	86.1	85.5	DNAJ HOMOLOG SUBFAMILY C MEMBER	0.5294	68	ATP binding to DnaK triggers the release of the substrate protein, thus completing the reaction cycle	0.188406	69	77	Cytoplasm
COG001064	unkn	6179	Digenea	10239	Viruses	NA	0.401275	87.4	94.2	THYMIDYLATE KINASE	0.9964	277	Thymidylate kinase	0.366337	303	304	Cytoplasm
COG006837	unkn	6179	Digenea	2732007	Nucleocytoviricota	NA	0.182431	96.3	root	E3 UBIQUITIN-PROTEIN LIGASE TOPORS	0.25	8	DNA topoisomerase binding	0.25	8	10	Nucleus
COG000869	unkn	2864	Dinophyceae	455363	unclassified Phycodnaviridae	NA	0.541867	80.3	97	MYOINOSITOL OXYGENASE	0.9876	241	Myo-inositol oxygenase	0.454039	359	363	Cytoplasm
COG000330	unkn	2864	Dinophyceae	2732007	Nucleocytoviricota	NA	0.273465	100	89.2	ARSENITE METHYLTRANSFERASE	0.2773	339	Mycolic acid cyclopropane synthetase	0.363636	715	718	Mitochondrion
COG001106	unkn	2864	Dinophyceae	2732007	Nucleocytoviricota	NA	0.528298	99.7	99.8	METHYLTRANSFERASE	0.9027	113	Methylase involved in ubiquinone menaquinone biosynthesis	0.278351	291	294	Cytoplasm
COG001332	unkn	2864	Dinophyceae	2732007	Nucleocytoviricota	NA	1.10443	89	86.2	METHYLTRANSFERASE, FKBM FAMILY PROTEIN	0.8	5	Methyltransferase FkbM domain	0.363636	33	248	Unknown
COG001401	unkn	2864	Dinophyceae	2732007	Nucleocytoviricota	NA	0.511	90.8	90.7	RHAMNAN SYNTHESIS F	1	20	Glycosyltransferase WbsX	0.846154	234	235	Unknown
COG003607	unkn	2864	Dinophyceae	2732007	Nucleocytoviricota	NA	0.396125	82.8	96.3	EXOSTOSIN HEPARAN SULFATE GLYCOSYLTRANSFERASE -RELATED	1	1	cyclopropane-fatty-acyl-phospholipid synthase	0.806452	31	62	Extracellular
COG000599	unkn	2864	Dinophyceae	2732523	Megaviricetes	NA	1.57107	84.4	80.5	PROCOLLAGEN-LYSINE,2-OXOGLUTARATE 5-DIOXYGENASE/GLYCOSYLTRANSFERASE 25 FAMILY MEMBER	1	186	Glycosyltransferase family 25 (LPS biosynthesis protein)	0.435417	480	487	Mitochondrion
COG000032	unkn	2611352	Discoba	10239	Viruses	NA	0.187056	87.5	88.1	THIOREDOXIN	0.4056	1383	Belongs to the thioredoxin family	0.394606	3226	3257	Cytoplasm
COG000383	unkn	2611352	Discoba	1977631	Catovirus CTV1	NA	0.102108	94.6	80.7	SKP1	0.9934	608	Belongs to the SKP1 family	0.558917	628	644	Cytoplasm
COG000068	unkn	7227	Drosophila melanogaster	523909	Musca domestica salivary gland hypertrophy virus	NA	0.0525161	93.8	84.5	RIBONUCLEOSIDE-DIPHOSPHATE REDUCTASE SMALL CHAIN	0.9972	1762	Ribonucleotide reductase, small chain	0.392931	1924	1961	Unknown
COG001524	unkn	7227	Drosophila melanogaster	Weakly supported	Weakly supported	long branching recipient	0.612745	89.6	87.9	DNA LIGASE 1/3 FAMILY MEMBER	1	210	DNA ligase (ATP) activity	0.666667	213	214	Mitochondrion
COG000950	unkn	2880	Ectocarpus siliculosus	455363	unclassified Phycodnaviridae	NA	0.655707	87.6	92.8	SLR1628 PROTEIN	1	68	Uncharacterized protein conserved in bacteria (DUF2237)	0.517647	340	341	Unknown
COG000131	unkn	2880	Ectocarpus siliculosus	654926	Ectocarpus siliculosus virus 1 (isolate Kaikoura)	NA	0.0237006	93.9	100	3-5 EXONUCLEASE	0.5	2	Poxvirus Late Transcription Factor VLTF3 like	1	1227	1276	Nucleus
COG000158	unkn	2880	Ectocarpus siliculosus	654926	Ectocarpus siliculosus virus 1 (isolate Kaikoura)	NA	0.0260516	91.7	100	PROLIFERATING CELL NUCLEAR ANTIGEN	1	1088	Proliferating cell nuclear antigen, C-terminal domain	0.969973	1099	1129	Cytoplasm
COG003433	unkn	2880	Ectocarpus siliculosus	654926	Ectocarpus siliculosus virus 1 (isolate Kaikoura)	NA	0.229392	100	93.9	KREMEN PROTEIN	0.5	8	Parallel beta-helix repeats	0.65625	64	68	Extracellular
COG005620	unkn	2880	Ectocarpus siliculosus	654926	Ectocarpus siliculosus virus 1 (isolate Kaikoura)	NA	0.012565	100	95.4	No annotation	0	0	no annotation	0	0	18	Unknown
COG006165	unkn	2880	Ectocarpus siliculosus	654926	Ectocarpus siliculosus virus 1 (isolate Kaikoura)	NA	0.0610194	100	99.9	No annotation	0	0	no annotation	0	0	14	Nucleus
COG008574	unkn	2880	Ectocarpus siliculosus	654926	Ectocarpus siliculosus virus 1 (isolate Kaikoura)	NA	0.0612752	100	root	No annotation	0	0	no annotation	0	0	6	Nucleus
COG009349	unkn	2880	Ectocarpus siliculosus	654926	Ectocarpus siliculosus virus 1 (isolate Kaikoura)	NA	0.0202213	100	root	No annotation	0	0	no annotation	0	0	5	Cytoplasm
COG009374	unkn	2880	Ectocarpus siliculosus	654926	Ectocarpus siliculosus virus 1 (isolate Kaikoura)	NA	0.302711	100	root	WASP INTERACTING PROTEIN-RELATED	1	1	no annotation	0	0	5	Nucleus
COG009627	unkn	2880	Ectocarpus siliculosus	654926	Ectocarpus siliculosus virus 1 (isolate Kaikoura)	NA	2.0491e-06	100	root	TWO-COMPONENT HISTIDINE PROTEIN KINASE	1	1	phosphorelay sensor kinase activity	1	1	4	Nucleus
COG001138	unkn	2880	Ectocarpus siliculosus	Weakly supported	Weakly supported	long branching recipient	1.28082	98.7	83.8	PTHR46101	0.9559	136	Pyridoxal-dependent decarboxylase conserved domain	0.274306	288	288	Unknown
COG000269	unkn	5799	Eimeriidae	455363	unclassified Phycodnaviridae	NA	0.603163	84.3	86.5	ACYL-COA-BINDING PROTEIN, ACBP	0.9137	556	Acyl CoA binding protein	0.386308	818	832	Unknown
COG000048	unkn	2903	Emiliania huxleyi	10239	Viruses	NA	0.392514	91.2	98.7	RIBONUCLEOSIDE-DIPHOSPHATE REDUCTASE LARGE CHAIN	0.9955	2244	Provides the precursors necessary for DNA synthesis	0.506765	2439	2481	Unknown
COG000113	unkn	2903	Emiliania huxleyi	10239	Viruses	NA	0.449905	83.7	82.8	UBIQUITIN	0.9609	1279	ubiquitin	0.414104	1333	1402	Cytoplasm
COG001438	unkn	2903	Emiliania huxleyi	10239	Viruses	NA	1.19153	97.7	89	MANNOSYL PHOSPHORYLINOSITOL CERAMIDE SYNTHASE	1	181	Glycosyltransferase sugar-binding region containing DXD motif	0.502242	223	229	Mitochondrion
COG000941	unkn	2903	Emiliania huxleyi	10501	Phycodnaviridae	NA	0.394724	99.9	94.2	PROLYL 4-HYDROXYLASE ALPHA SUBUNIT	0.9854	206	Prolyl 4-hydroxylase alpha subunit homologues	0.828402	338	343	Cytoplasm
COG001507	unkn	2903	Emiliania huxleyi	181086	Prymnesiovirus	NA	0.687204	100	96.2	FATTY ACID DESATURASE 2	1	43	Fatty acid desaturase	0.714953	214	217	Unknown
COG001062	unkn	2903	Emiliania huxleyi	346673	Coccolithovirus	NA	0.298994	100	94.8	SPINSTER	0.9818	274	Major Facilitator Superfamily	0.438356	292	305	Cell_membrane
COG000100	unkn	2903	Emiliania huxleyi	455363	unclassified Phycodnaviridae	NA	0.535683	100	91	SULFOTRANSFERASE SULT	0.9971	1356	Belongs to the sulfotransferase 1 family	0.268803	1529	1539	Unknown
COG000269	unkn	2903	Emiliania huxleyi	2732007	Nucleocytoviricota	NA	0.772461	87.3	92.4	ACYL-COA-BINDING PROTEIN, ACBP	0.9137	556	Acyl CoA binding protein	0.386308	818	832	Nucleus
COG002053	unkn	2903	Emiliania huxleyi	2732007	Nucleocytoviricota	NA	1.62559	93.9	97.4	UDP-N-ACETYLGLUCOSAMINE--PEPTIDE N-ACETYLGLUCOSAMINYLTRANSFERASE SPINDLY-RELATED	0.7778	63	O-linked N-acetylglucosamine transferase SPINDLY family	0.467949	156	161	Cytoplasm
COG002766	unkn	2903	Emiliania huxleyi	2732007	Nucleocytoviricota	NA	3.57219	81.3	87.6	SI:CH211-59O9.10	0.7843	102	ubiquitin-protein transferase activity	0.11	100	109	Cytoplasm
COG004980	unkn	2903	Emiliania huxleyi	2732007	Nucleocytoviricota	NA	1.44465	88.9	root	No annotation	0	0	no annotation	0	0	26	Cell_membrane
COG003368	unkn	2903	Emiliania huxleyi	Weakly supported	Weakly supported	long branching recipient	3.07925	88.9	88.2	OXOGLUTARATE/IRON-DEPENDENT DIOXYGENASE	1	66	peptidase inhibitor activity	0.692308	13	72	Nucleus
COG000110	unkn	284813	Encephalitozoon cuniculi GB-M1	10239	Viruses	NA	0.777332	83	88.6	DEOXYURIDINE 5'-TRIPHOSPHATE NUCLEOTIDOHYDROLASE	1	940	dUTPase	0.432432	1406	1412	Cytoplasm
COG000387	unkn	284813	Encephalitozoon cuniculi GB-M1	10239	Viruses	NA	1.31029	91.2	90.3	DNA-DIRECTED RNA POLYMERASES I, II, AND III SUBUNIT RPABC1	0.9977	426	DNA-dependent RNA polymerase catalyzes the transcription of DNA into RNA using the four ribonucleoside triphosphates as substrates	0.3312	625	639	Unknown
COG001064	unkn	284813	Encephalitozoon cuniculi GB-M1	2732555	Pimascovirales	NA	0.835595	95.2	91.9	THYMIDYLATE KINASE	0.9964	277	Thymidylate kinase	0.366337	303	304	Cytoplasm
COG000048	unkn	284813	Encephalitozoon cuniculi GB-M1	Weakly supported	Weakly supported	long branching recipient	0.64682	98.2	86.9	RIBONUCLEOSIDE-DIPHOSPHATE REDUCTASE LARGE CHAIN	0.9955	2244	Provides the precursors necessary for DNA synthesis	0.506765	2439	2481	Cytoplasm
COG000858	unkn	5758	Entamoeba	10239	Viruses	NA	0.243566	100	90.2	TYROSINE-TRNA LIGASE	0.8756	209	Belongs to the class-I aminoacyl-tRNA synthetase family	0.453782	357	366	Cytoplasm
COG000144	unkn	5758	Entamoeba	2487774	Sylvanvirus sp.	NA	0.804875	99.4	84.5	PROTEASE M1 ZINC METALLOPROTEASE	0.999	994	metalloaminopeptidase activity	0.340734	1171	1194	Cytoplasm
COG000005	unkn	5758	Entamoeba	Weakly supported	Weakly supported	long branching donor	0.787808	82.4	89.2	DRAB5-RELATED	0.2327	10584	Rab subfamily of small GTPases	0.149102	10798	10903	Cytoplasm
COG000377	unkn	5758	Entamoeba	Weakly supported	Weakly supported	long branching donor	0.728596	83	95.7	PHOSPHATIDATE CYTIDYLYLTRANSFERASE	0.5478	115	Belongs to the CDS family	0.564417	652	653	Endoplasmic_reticulum
COG001059	unkn	5758	Entamoeba	Weakly supported	Weakly supported	long branching donor	0.43283	94.8	root	SHORT-CHAIN DEHYDROGENASE/REDUCTASE	0.9867	150	short chain dehydrogenase	0.528053	303	306	Unknown
COG000189	unkn	5759	Entamoeba histolytica	2126984	Tupanvirus deep ocean	NA	0.50125	87.5	85.4	GANGLIOSIDE INDUCED DIFFERENTIATION ASSOCIATED PROTEIN 2-RELATED	0.8168	262	Appr-1'-p processing enzyme	0.323558	1023	1029	Cytoplasm
COG006629	unkn	5759	Entamoeba histolytica	2732007	Nucleocytoviricota	NA	3.1028	81.1	root	RING ZINC FINGER PROTEIN-RELATED	0.6667	3	ubiquitin-protein transferase activity	0.5	2	11	Nucleus
COG000768	unkn	5759	Entamoeba histolytica	Weakly supported	Weakly supported	long branching recipient	2.29352	83.1	86.8	DUAL SPECIFICITY PROTEIN PHOSPHATASE	0.9536	366	Belongs to the protein-tyrosine phosphatase family	0.211196	393	397	Nucleus
COG000032	unkn	370355	Entamoeba invadens IP1	10239	Viruses	NA	0.670607	87.5	88.1	THIOREDOXIN	0.4056	1383	Belongs to the thioredoxin family	0.394606	3226	3257	Cytoplasm
COG000005	unkn	370355	Entamoeba invadens IP1	455363	unclassified Phycodnaviridae	NA	0.511422	87.8	80.6	DRAB5-RELATED	0.2327	10584	Rab subfamily of small GTPases	0.149102	10798	10903	Unknown
COG000314	unkn	370355	Entamoeba invadens IP1	455363	unclassified Phycodnaviridae	NA	0.814896	80.3	81.3	HISTONE H3	0.9324	740	protein heterodimerization activity	0.693767	738	752	Nucleus
COG000032	unkn	370355	Entamoeba invadens IP1	2732523	Megaviricetes	NA	1.23547	93.9	85.6	THIOREDOXIN	0.4056	1383	Belongs to the thioredoxin family	0.394606	3226	3257	Unknown
COG000503	unkn	370355	Entamoeba invadens IP1	Weakly supported	Weakly supported	long branching recipient	1.69367	95	99.1	ANAEROBIC RIBONUCLEOSIDE-TRIPHOSPHATE REDUCTASE	1	397	ribonucleoside-triphosphate reductase activity	0.53539	551	552	Cytoplasm
COG000009	unkn	2759	Eukaryota	10239	Viruses	NA	0.274626	83.8	90.9	CELL DIVISION PROTEIN KINASE	0.4861	7181	Belongs to the protein kinase superfamily	0.127773	7302	7369	Cytoplasm
COG000036	unkn	2759	Eukaryota	10239	Viruses	NA	0.133178	80.1	85.5	PROTEIN PHOSPHATASE 2C	0.6993	2820	protein serine/threonine phosphatase activity	0.215374	2888	2939	Mitochondrion
COG000048	unkn	2759	Eukaryota	10239	Viruses	NA	0.2898	91.7	100	RIBONUCLEOSIDE-DIPHOSPHATE REDUCTASE LARGE CHAIN	0.9955	2244	Provides the precursors necessary for DNA synthesis	0.506765	2439	2481	Cytoplasm
COG000098	unkn	2759	Eukaryota	10239	Viruses	NA	0.0982732	96	90.5	DUAL SPECIFICITY PROTEIN PHOSPHATASE	0.3823	1512	Dual specificity phosphatase, catalytic domain	0.230013	1526	1556	Nucleus
COG000110	unkn	2759	Eukaryota	10239	Viruses	NA	0.85034	84.4	root	DEOXYURIDINE 5'-TRIPHOSPHATE NUCLEOTIDOHYDROLASE	1	940	dUTPase	0.432432	1406	1412	Cytoplasm
COG000113	unkn	2759	Eukaryota	10239	Viruses	NA	0.353566	83.7	82.8	UBIQUITIN	0.9609	1279	ubiquitin	0.414104	1333	1402	Nucleus
COG000125	unkn	2759	Eukaryota	10239	Viruses	NA	0.615665	86.3	85.8	DEOXYCYTIDYLATE DEAMINASE-RELATED	0.9988	855	Cytidine and deoxycytidylate deaminase zinc-binding region	0.382065	1327	1337	Nucleus
COG000139	unkn	2759	Eukaryota	10239	Viruses	NA	0.235253	98.5	86.4	DTDP-D-GLUCOSE 4,6-DEHYDRATASE-RELATED	0.7699	969	dTDP-glucose 4,6-dehydratase activity	0.372171	1193	1220	Mitochondrion
COG000139	unkn	2759	Eukaryota	10239	Viruses	NA	0.458584	97.5	95.1	DTDP-D-GLUCOSE 4,6-DEHYDRATASE-RELATED	0.7699	969	dTDP-glucose 4,6-dehydratase activity	0.372171	1193	1220	Peroxisome
COG000139	unkn	2759	Eukaryota	10239	Viruses	NA	0.212153	92.1	83.9	DTDP-D-GLUCOSE 4,6-DEHYDRATASE-RELATED	0.7699	969	dTDP-glucose 4,6-dehydratase activity	0.372171	1193	1220	Cytoplasm
COG000209	unkn	2759	Eukaryota	10239	Viruses	NA	0.618863	89.4	90.4	ALPHA-KETOGLUTARATE-DEPENDENT DIOXYGENASE ALKB HOMOLOG 3	0.6376	356	2OG-Fe(II) oxygenase superfamily	0.391032	959	973	Plastid
COG000272	unkn	2759	Eukaryota	10239	Viruses	NA	0.563747	86	85.3	FLAP ENDONUCLEASE FAMILY MEMBER	0.9927	546	Structure-specific nuclease with 5'-flap endonuclease and 5'-3' exonuclease activities involved in DNA replication and repair	0.751225	816	826	Mitochondrion
COG000342	unkn	2759	Eukaryota	10239	Viruses	NA	0.102617	82.4	91.2	DEOXYNUCLEOSIDE TRIPHOSPHATE TRIPHOSPHOHYDROLASE	1	532	dGTPase activity	0.21256	621	698	Cytoplasm
COG000342	unkn	2759	Eukaryota	10239	Viruses	NA	0.093395	92.7	91.2	DEOXYNUCLEOSIDE TRIPHOSPHATE TRIPHOSPHOHYDROLASE	1	532	dGTPase activity	0.21256	621	698	Cytoplasm
COG000484	unkn	2759	Eukaryota	10239	Viruses	NA	0.7271	98.3	root	FATTY ACID DESATURASE 2	1	224	Fatty acid desaturase	0.389587	557	564	Endoplasmic_reticulum
COG000484	unkn	2759	Eukaryota	10239	Viruses	NA	0.291556	98.3	root	FATTY ACID DESATURASE 2	1	224	Fatty acid desaturase	0.389587	557	564	Endoplasmic_reticulum
COG000623	unkn	2759	Eukaryota	10239	Viruses	NA	0.145827	100	root	GLYCYL-TRNA SYNTHETASE/DNA POLYMERASE SUBUNIT GAMMA-2	0.9969	320	glycyl-tRNA aminoacylation	0.174098	471	473	Cytoplasm
COG000810	unkn	2759	Eukaryota	10239	Viruses	NA	0.187082	83	82.4	CAMK FAMILY PROTEIN KINASE	0.5	6	Domain of unknown function (DUF1768)	0.542781	374	381	Mitochondrion
COG000810	unkn	2759	Eukaryota	10662	Myoviridae	NA	0.080948	82.4	87.7	CAMK FAMILY PROTEIN KINASE	0.5	6	Domain of unknown function (DUF1768)	0.542781	374	381	Unknown
COG001275	unkn	2759	Eukaryota	28883	Caudovirales	NA	0.243067	87.9	92.5	No annotation	0	0	RNA ligase	0.988372	258	258	Cytoplasm
COG000554	unkn	2759	Eukaryota	455363	unclassified Phycodnaviridae	NA	0.71005	86	95.7	PTHR46496	0.4395	248	FAD binding domain	0.454012	511	513	Cell_membrane
COG000941	unkn	2759	Eukaryota	455363	unclassified Phycodnaviridae	NA	0.260045	86.5	88.1	PROLYL 4-HYDROXYLASE ALPHA SUBUNIT	0.9854	206	Prolyl 4-hydroxylase alpha subunit homologues	0.828402	338	343	Cytoplasm
COG001432	unkn	2759	Eukaryota	455363	unclassified Phycodnaviridae	NA	0.158524	94.3	86.5	3-DEOXY-MANNO-OCTULOSONATE CYTIDYLYLTRANSFERASE	1	78	Activates KDO (a required 8-carbon sugar) for incorporation into bacterial lipopolysaccharide in Gram-negative bacteria	0.726087	230	230	Mitochondrion
COG000001	unkn	2759	Eukaryota	549779	Mimiviridae	NA	0.937897	90.4	88.7	SERINE/THREONINE-PROTEIN KINASE	0.2995	16718	protein serine/threonine kinase activity	0.191391	17075	17289	Cytoplasm
COG001200	unkn	2759	Eukaryota	549779	Mimiviridae	NA	0.075535	92.8	95.9	VESICULAR-FUSION PROTEIN NSF	0.9887	266	AAA domain (Cdc48 subfamily)	0.245421	273	274	Cytoplasm
COG000113	unkn	2759	Eukaryota	944644	Marseilleviridae	NA	0.158923	88.1	90.9	UBIQUITIN	0.9609	1279	ubiquitin	0.414104	1333	1402	Cytoplasm
COG005805	unkn	2759	Eukaryota	1868663	uncultured Mediterranean phage uvDeep-CGR0-KM14-C182	NA	0.245495	82.3	root	MUCIN	1	1	Belongs to the helicase family	0.533333	15	16	Mitochondrion
COG000032	unkn	2759	Eukaryota	1880590	Tenacibaculum phage pT24	NA	0.261518	91.3	88.3	THIOREDOXIN	0.4056	1383	Belongs to the thioredoxin family	0.394606	3226	3257	Plastid
COG000253	unkn	2759	Eukaryota	1988039	Mimivirus AB-566-O17	NA	0.149889	97.6	89.6	CHITINASE	0.9854	684	Belongs to the glycosyl hydrolase 18 family	0.258918	869	875	Extracellular
COG000258	unkn	2759	Eukaryota	2506605	Marseillevirus LCMAC201	NA	0.096966	86.6	87.3	C-1-TETRAHYDROFOLATE SYNTHASE, CYTOPLASMIC-RELATED	1	595	Catalyzes the oxidation of 5,10- methylenetetrahydrofolate to 5,10-methenyltetrahydrofolate and then the hydrolysis of 5,10-methenyltetrahydrofolate to 10- formyltetrahydrofolate	0.341094	859	863	Mitochondrion
COG000005	unkn	2759	Eukaryota	2732007	Nucleocytoviricota	NA	0.168618	88.3	89.3	DRAB5-RELATED	0.2327	10584	Rab subfamily of small GTPases	0.149102	10798	10903	Golgi_apparatus
COG000019	unkn	2759	Eukaryota	2732007	Nucleocytoviricota	NA	0.10007	82.7	94.5	HEAT SHOCK PROTEIN 70KDA	0.8288	3895	Belongs to the heat shock protein 70 family	0.27064	4530	4585	Cytoplasm
COG000043	unkn	2759	Eukaryota	2732007	Nucleocytoviricota	NA	0.146041	96	81.9	THYMIDYLATE SYNTHASE 1	0.701	2381	Thymidylate synthase	0.35328	2607	2647	Mitochondrion
COG000066	unkn	2759	Eukaryota	2732007	Nucleocytoviricota	NA	0.426552	94.6	92.2	PEPTIDYL-PROLYL CIS-TRANS ISOMERASE	0.585	1682	Peptidyl-prolyl cis-trans isomerase	0.282587	1964	2001	Extracellular
COG000113	unkn	2759	Eukaryota	2732007	Nucleocytoviricota	NA	0.48952	84.6	87.4	UBIQUITIN	0.9609	1279	ubiquitin	0.414104	1333	1402	Nucleus
COG000137	unkn	2759	Eukaryota	2732007	Nucleocytoviricota	NA	0.147494	98	94.3	REPLICATION FACTOR C / DNA POLYMERASE III GAMMA-TAU SUBUNIT	0.9991	1056	Part of the RFC clamp loader complex which loads the PCNA sliding clamp onto DNA	0.14134	1224	1230	Cytoplasm
COG000137	unkn	2759	Eukaryota	2732007	Nucleocytoviricota	NA	0.179405	96.4	94.3	REPLICATION FACTOR C / DNA POLYMERASE III GAMMA-TAU SUBUNIT	0.9991	1056	Part of the RFC clamp loader complex which loads the PCNA sliding clamp onto DNA	0.14134	1224	1230	Cytoplasm
COG000151	unkn	2759	Eukaryota	2732007	Nucleocytoviricota	NA	0.678134	91.6	100	DNA TOPOISOMERASE, TYPE IA, CORE	0.9946	933	Releases the supercoiling and torsional tension of DNA, which is introduced during the DNA replication and transcription, by transiently cleaving and rejoining one strand of the DNA duplex	0.807448	1101	1141	Nucleus
COG000151	unkn	2759	Eukaryota	2732007	Nucleocytoviricota	NA	0.664571	94.6	81	DNA TOPOISOMERASE, TYPE IA, CORE	0.9946	933	Releases the supercoiling and torsional tension of DNA, which is introduced during the DNA replication and transcription, by transiently cleaving and rejoining one strand of the DNA duplex	0.807448	1101	1141	Nucleus
COG000203	unkn	2759	Eukaryota	2732007	Nucleocytoviricota	NA	0.153891	83.5	80.4	MICROTUBULE-ASSOCIATED PROTEINS 1A/1B LIGHT CHAIN 3-RELATED	0.999	954	Belongs to the ATG8 family	0.387565	965	987	Nucleus
COG000249	unkn	2759	Eukaryota	2732007	Nucleocytoviricota	NA	0.131117	91.6	97.7	PROTEASE FAMILY S9A OLIGOPEPTIDASE	0.6147	558	Prolyl oligopeptidase, N-terminal beta-propeller domain	0.272311	874	881	Mitochondrion
COG000429	unkn	2759	Eukaryota	2732007	Nucleocytoviricota	NA	0.038349	82.5	96.4	NHL REPEAT-CONTAINING PROTEIN 2	0.8098	326	NHL repeat	0.219224	593	606	Cell_membrane
COG000746	unkn	2759	Eukaryota	2732007	Nucleocytoviricota	NA	0.180501	80.7	94.4	L-ASPARAGINASE	0.9919	247	Asparaginase	0.386534	401	405	Cytoplasm
COG000849	unkn	2759	Eukaryota	2732007	Nucleocytoviricota	NA	0.106526	90.3	97.1	THREONINE SYNTHASE FAMILY MEMBER	0.7512	213	Threonine synthase	0.237057	367	369	Mitochondrion
COG004265	unkn	2759	Eukaryota	2732007	Nucleocytoviricota	NA	0.289239	100	root	CALPAIN	0.5	2	SET (Su(var)3-9, Enhancer-of-zeste, Trithorax) domain	1	35	40	Mitochondrion
COG005622	unkn	2759	Eukaryota	2732007	Nucleocytoviricota	NA	0.12345	97.8	root	No annotation	0	0	no annotation	0	0	18	Mitochondrion
COG007074	unkn	2759	Eukaryota	2732007	Nucleocytoviricota	NA	0.444649	97.1	root	POLY-BETA-1,6-N-ACETYL-D-GLUCOSAMINE SYNTHASE	1	1	Glycosyltransferase like family 2	0.8	10	10	Endoplasmic_reticulum
COG000032	unkn	2759	Eukaryota	2732523	Megaviricetes	NA	0.235793	87.5	83.8	THIOREDOXIN	0.4056	1383	Belongs to the thioredoxin family	0.394606	3226	3257	Endoplasmic_reticulum
COG000089	unkn	2759	Eukaryota	2732523	Megaviricetes	NA	0.36306	100	99.6	ATP-DEPENDENT RNA AND DNA HELICASE	0.965	1228	DNA-dependent ATPase and 3'-5' DNA helicase that may be involved in repair of stalled replication forks	0.292776	1578	1607	Cytoplasm
COG000518	unkn	2759	Eukaryota	2732523	Megaviricetes	NA	0.051051	100	94.6	PEROXIREDOXIN	0.9917	363	Redoxin	0.332703	529	539	Cytoplasm
COG000945	unkn	2759	Eukaryota	2732523	Megaviricetes	NA	0.66783	80.1	100	N-TERMINAL ACETYLTRANSFERASE	0.9918	245	TIGRFAM ribosomal-protein-alanine acetyltransferase	0.220588	340	342	Extracellular
COG003191	unkn	2759	Eukaryota	2732523	Megaviricetes	NA	0.113704	94.2	root	PROTEIN C6ORF130	1	63	Macro domain	0.39726	73	82	Cytoplasm
COG000003	unkn	2759	Eukaryota	Weakly supported	Weakly supported	long branching recipient	1.04321	97.2	91.8	ATP-DEPENDENT RNA HELICASE	0.4875	2482	RNA-protein covalent cross-linking	0.962677	11387	12749	Nucleus
COG000003	unkn	2759	Eukaryota	Weakly supported	Weakly supported	long branching recipient	1.42922	95.4	91.8	ATP-DEPENDENT RNA HELICASE	0.4875	2482	RNA-protein covalent cross-linking	0.962677	11387	12749	Cytoplasm
COG000005	unkn	2759	Eukaryota	Weakly supported	Weakly supported	long branching donor	0.326837	94.7	89.3	DRAB5-RELATED	0.2327	10584	Rab subfamily of small GTPases	0.149102	10798	10903	Unknown
COG000006	unkn	2759	Eukaryota	Weakly supported	Weakly supported	long branching donor	0.260139	87.2	89.2	RIBOSOMAL PROTEIN S6 KINASE	0.3016	8645	protein serine/threonine kinase activity	0.106591	8800	8897	Cytoplasm
COG000009	unkn	2759	Eukaryota	Weakly supported	Weakly supported	long branching donor	0.580322	88.7	root	CELL DIVISION PROTEIN KINASE	0.4861	7181	Belongs to the protein kinase superfamily	0.127773	7302	7369	Cytoplasm
COG000048	unkn	2759	Eukaryota	Weakly supported	Weakly supported	long branching recipient	3.20297	97.9	100	RIBONUCLEOSIDE-DIPHOSPHATE REDUCTASE LARGE CHAIN	0.9955	2244	Provides the precursors necessary for DNA synthesis	0.506765	2439	2481	Cytoplasm
COG000079	unkn	2759	Eukaryota	Weakly supported	Weakly supported	long branching recipient	1.47287	83.3	91.2	DUAL SPECIFICITY PROTEIN KINASE	0.7051	1760	Protein tyrosine kinase	0.126476	1779	1799	Nucleus
COG000118	unkn	2759	Eukaryota	Weakly supported	Weakly supported	long branching donor	0.239682	97.8	94.4	HEAT SHOCK PROTEIN 90 FAMILY MEMBER	0.9975	1184	Hsp90 protein	0.25405	1358	1376	Nucleus
COG000204	unkn	2759	Eukaryota	Weakly supported	Weakly supported	long branching donor	0.147133	83	84.4	NUCLEOSIDE DIPHOSPHATE KINASE	0.934	591	Major role in the synthesis of nucleoside triphosphates other than ATP	0.413374	987	987	Cytoplasm
COG000303	unkn	2759	Eukaryota	Weakly supported	Weakly supported	long branching recipient	0.834325	99.7	root	GDP-MANNOSE 4,6-DEHYDRATASE	0.99	600	Catalyzes the conversion of GDP-D-mannose to GDP-4- dehydro-6-deoxy-D-mannose	0.357049	759	771	Peroxisome
COG000355	unkn	2759	Eukaryota	Weakly supported	Weakly supported	long branching donor	0.549173	81.6	86	UDP-GLUCURONIC ACID DECARBOXYLASE-RELATED	0.891	422	UDP-glucuronate decarboxylase activity	0.121302	676	686	Cytoplasm
COG000369	unkn	2759	Eukaryota	Weakly supported	Weakly supported	long branching donor	0.101857	95.1	92.4	DNA-DIRECTED RNA POLYMERASE	0.9978	460	DNA-dependent RNA polymerase catalyzes the transcription of DNA into RNA using the four ribonucleoside triphosphates as substrates	0.263952	663	664	Cytoplasm
COG000393	unkn	2759	Eukaryota	Weakly supported	Weakly supported	long branching donor	0.111356	87.5	82.9	UDP-GLUCOSE 4-EPIMERASE	0.7828	465	UDP-glucose 4-epimerase	0.169304	632	636	Golgi_apparatus
COG000496	unkn	2759	Eukaryota	Weakly supported	Weakly supported	long branching donor	0.28212	88.2	root	DNA LIGASE 1/3 FAMILY MEMBER	0.9845	323	DNA ligase	0.310469	554	557	Cytoplasm
COG000519	unkn	2759	Eukaryota	Weakly supported	Weakly supported	long branching donor	0.07343	95.7	92.2	CYCLIC NUCLEOTIDE-GATED CATION CHANNEL SUBUNIT A	0.9093	496	cyclic nucleotide-gated ion channel activity	0.246241	532	538	Cell_membrane
COG000576	unkn	2759	Eukaryota	Weakly supported	Weakly supported	long branching donor	0.447806	83.2	82.2	NAD-DEPENDENT PROTEIN LIPOAMIDASE SIRTUIN-4	0.4946	277	NAD-dependent lysine deacetylase and desuccinylase that specifically removes acetyl and succinyl groups on target proteins	0.288618	492	497	Mitochondrion
COG000762	unkn	2759	Eukaryota	Weakly supported	Weakly supported	long branching donor	0.041265	88.9	root	BIFUNCTIONAL PURINE BIOSYNTHESIS PROTEIN PURH	0.9833	239	Bifunctional purine biosynthesis protein PurH	0.237975	395	397	Cytoplasm
COG000959	unkn	2759	Eukaryota	Weakly supported	Weakly supported	long branching recipient	0.95404	100	root	HOMOCITRATE SYNTHASE-RELATED	0.84	175	Catalyzes the condensation of the acetyl group of acetyl-CoA with 3-methyl-2-oxobutanoate (2-oxoisovalerate) to form 3-carboxy-3-hydroxy-4-methylpentanoate (2-isopropylmalate)	0.436364	330	338	Cytoplasm
COG000985	unkn	2759	Eukaryota	Weakly supported	Weakly supported	long branching donor	0.092204	90.8	root	PHOSPHO-2-DEHYDRO-3-DEOXYHEPTONATE ALDOLASE DAHP SYNTHETASE	1	177	Stereospecific condensation of phosphoenolpyruvate (PEP) and D-erythrose-4-phosphate (E4P) giving rise to 3-deoxy-D- arabino-heptulosonate-7-phosphate (DAHP)	0.82622	328	330	Cytoplasm
COG001349	unkn	2759	Eukaryota	Weakly supported	Weakly supported	long branching donor	0.448826	95.9	root	RIBOFLAVIN SYNTHASE ALPHA CHAIN	0.9891	92	Lumazine binding domain	0.296296	243	244	Cytoplasm
COG001466	unkn	2759	Eukaryota	Weakly supported	Weakly supported	long branching donor	0.356312	99.8	root	DJ-1 PROTEIN	0.9865	74	DJ-1/PfpI family	0.443946	223	224	Cytoplasm
COG001506	unkn	2759	Eukaryota	Weakly supported	Weakly supported	long branching donor	0.230906	81.8	95.5	BNR/ASP-BOX REPEAT FAMILY PROTEIN	1	31	BNR repeat-like domain	0.792627	217	217	Extracellular
COG002523	unkn	6072	Eumetazoa	340016	uncultured virus	NA	0.317423	95.4	90.8	BIFUNCTIONAL POLYMYXIN RESISTANCE PROTEIN ARNA	0.9167	24	NAD-dependent epimerase dehydratase	0.189394	132	132	Cytoplasm
COG000599	unkn	6072	Eumetazoa	2732007	Nucleocytoviricota	NA	0.333451	91.8	83.1	PROCOLLAGEN-LYSINE,2-OXOGLUTARATE 5-DIOXYGENASE/GLYCOSYLTRANSFERASE 25 FAMILY MEMBER	1	186	Glycosyltransferase family 25 (LPS biosynthesis protein)	0.435417	480	487	Endoplasmic_reticulum
COG000697	unkn	2605435	Evosea	985780	unclassified Mimiviridae	NA	0.073606	92.1	88.8	HYPOXANTHINE-GUANINE PHOSPHORIBOSYLTRANSFERASE	1	144	Belongs to the purine pyrimidine phosphoribosyltransferase family	0.74186	430	430	Cytoplasm
COG001274	unkn	1519565	Fistulifera solaris	10239	Viruses	NA	1.71259	83.8	94	RIBITOL-5-PHOSPHATE XYLOSYLTRANSFERASE 1	0.8384	99	Haloacid dehalogenase-like hydrolase	0.357143	14	258	Golgi_apparatus
COG001593	unkn	1519565	Fistulifera solaris	2732007	Nucleocytoviricota	NA	1.51954	85.2	93.5	UNNAMED PRODUCT	0.8598	107	repeat protein	0.35	160	206	Unknown
COG000413	unkn	691883	Fonticula alba	985780	unclassified Mimiviridae	NA	0.539982	84.8	99.6	THREONINE-TRNA LIGASE	0.9978	460	Catalyzes the attachment of threonine to tRNA(Thr) in a two-step reaction L-threonine is first activated by ATP to form Thr-AMP and then transferred to the acceptor end of tRNA(Thr)	0.2589	618	623	Cytoplasm
COG000786	unkn	691883	Fonticula alba	2732007	Nucleocytoviricota	NA	0.608563	84.7	80.2	METHIONINE SYNTHASE	0.6957	230	Methionine synthase	0.310705	383	391	Mitochondrion
COG000733	unkn	635003	Fragilariopsis cylindrus CCMP1102	10239	Viruses	NA	1.02571	90.7	90.3	POLYNUCLEOTIDYL TRANSFERASE, RIBONUCLEASE H-LIKE SUPERFAMILY PROTEIN	0.9701	268	RNase H	0.298246	399	412	Cytoplasm
COG001401	unkn	635003	Fragilariopsis cylindrus CCMP1102	2732007	Nucleocytoviricota	NA	1.21761	88.7	93.4	RHAMNAN SYNTHESIS F	1	20	Glycosyltransferase WbsX	0.846154	234	235	Unknown
COG002684	unkn	635003	Fragilariopsis cylindrus CCMP1102	2732007	Nucleocytoviricota	NA	0.710257	92.2	98.9	PTHR39638	1	14	Protein of unknown function (DUF1257)	0.801724	116	117	Unknown
COG000108	unkn	635003	Fragilariopsis cylindrus CCMP1102	Weakly supported	Weakly supported	long branching recipient	1.77241	90	89.4	DNA POLYMERASE TYPE-X FAMILY MEMBER	0.7341	1245	DNA ligase (NAD+) activity	0.532909	1413	1460	Nucleus
COG002433	unkn	635003	Fragilariopsis cylindrus CCMP1102	Weakly supported	Weakly supported	long branching recipient	1.60329	82.3	root	UBIQUITIN	0.9925	134	ubiquitin	0.514706	136	140	Cytoplasm
COG000766	unkn	130081	Galdieria sulphuraria	573012	Raphidovirus	NA	1.26394	98.5	93.8	MOLYBDOPTERIN COFACTOR SULFURASE MOSC	0.983	235	Sulfurates the molybdenum cofactor	0.192308	390	397	Unknown
COG002508	unkn	130081	Galdieria sulphuraria	2732007	Nucleocytoviricota	NA	0.18853	92.6	96.1	ENDO-BETA-1,6-GALACTANASE	1	51	O-Glycosyl hydrolase family 30	0.694656	131	133	Unknown
COG000038	unkn	130081	Galdieria sulphuraria	Weakly supported	Weakly supported	long branching donor	0.773278	98.6	88.4	DNA-DIRECTED RNA POLYMERASE	0.9996	2582	DNA-dependent RNA polymerase catalyzes the transcription of DNA into RNA using the four ribonucleoside triphosphates as substrates	0.704619	2793	2889	Unknown
COG000045	unkn	130081	Galdieria sulphuraria	Weakly supported	Weakly supported	long branching recipient	1.55437	96.4	96.3	DNA POLYMERASE CATALYTIC SUBUNIT	0.9057	2090	3'-5' exonuclease activity	0.66927	2561	2589	Cytoplasm
COG000702	unkn	184922	Giardia lamblia ATCC 50803	Weakly supported	Weakly supported	long branching recipient	1.26878	96.8	root	RNA-SPLICING LIGASE RTCB	0.9427	192	tRNA-splicing ligase RtcB	0.562061	427	428	Cytoplasm
COG000110	unkn	431595	Globisporangium ultimum DAOM BR144	Weakly supported	Weakly supported	long branching recipient	2.423	95	84.4	DEOXYURIDINE 5'-TRIPHOSPHATE NUCLEOTIDOHYDROLASE	1	940	dUTPase	0.432432	1406	1412	Unknown
COG004356	unkn	33097	Gonium pectorale	10239	Viruses	NA	1.61319	99.2	root	FLAVIN MONOAMINE OXIDASE	0.5455	33	FAD dependent oxidoreductase	0.378378	37	38	Extracellular
COG006233	unkn	33834	Gonyaulacaceae	2732007	Nucleocytoviricota	NA	0.203907	87	root	CARBOXYL-TERMINAL HYDROLASE, PUTATIVE-RELATED	1	1	ubiquitinyl hydrolase activity	1	1	13	Mitochondrion
COG000440	unkn	110365	Gregarina niphandrodes	2732523	Megaviricetes	NA	1.02347	90.8	99.3	ADP-RIBOSYLGLYCOHYDROLASE	1	131	ADP-ribosylglycohydrolase	0.673986	592	595	Unknown
COG000014	unkn	905079	Guillardia theta CCMP2712	455363	unclassified Phycodnaviridae	NA	0.384085	83.5	83.2	DNAJ HOMOLOG SUBFAMILY C MEMBER	0.3541	3253	ATP binding to DnaK triggers the release of the substrate protein, thus completing the reaction cycle	0.315643	5747	5826	Extracellular
COG000484	unkn	905079	Guillardia theta CCMP2712	455363	unclassified Phycodnaviridae	NA	0.375742	99.8	98.1	FATTY ACID DESATURASE 2	1	224	Fatty acid desaturase	0.389587	557	564	Endoplasmic_reticulum
COG008317	unkn	905079	Guillardia theta CCMP2712	455363	unclassified Phycodnaviridae	NA	0.870804	95.8	root	PROTEIN DISULFIDE-ISOMERASE A6	1	1	Protein disulfide isomerase	0.5	2	6	Unknown
COG008896	unkn	905079	Guillardia theta CCMP2712	1586712	Yellowstone lake mimivirus	NA	1.29634	89.6	root	E3 UBIQUITIN-PROTEIN LIGASE TTC3	1	1	RING-H2 zinc finger domain	1	1	5	Nucleus
COG001630	unkn	905079	Guillardia theta CCMP2712	1977639	Klosneuvirus	NA	0.273628	91	82	EUKARYOTIC TRANSLATION INITIATION FACTOR	1	200	translation initiation factor activity	0.835821	201	202	Nucleus
COG000658	unkn	905079	Guillardia theta CCMP2712	2732007	Nucleocytoviricota	NA	1.2754	86	90.2	AT29763P-RELATED	0.7828	419	Domain of unknown function (DUF1977)	0.206977	430	450	Nucleus
COG001994	unkn	905079	Guillardia theta CCMP2712	2732007	Nucleocytoviricota	NA	1.32686	99.4	root	UNCHARACTERIZED	1	89	Glycosyl transferase, family 2	0.449367	158	166	Cytoplasm
COG003312	unkn	905079	Guillardia theta CCMP2712	2732007	Nucleocytoviricota	NA	1.30893	88.8	84.2	ALPHA- 1,3 -FUCOSYLTRANSFERASE	0.7778	9	Glycosyltransferase family 10 (fucosyltransferase) C-term	0.818182	11	75	Unknown
COG003312	unkn	905079	Guillardia theta CCMP2712	2732007	Nucleocytoviricota	NA	0.789484	88.8	84.2	ALPHA- 1,3 -FUCOSYLTRANSFERASE	0.7778	9	Glycosyltransferase family 10 (fucosyltransferase) C-term	0.818182	11	75	Endoplasmic_reticulum
COG000628	unkn	905079	Guillardia theta CCMP2712	2732523	Megaviricetes	NA	0.41369	100	96.3	FOLATE-BIOPTERIN TRANSPORTER 1, CHLOROPLASTIC	0.9912	340	BT1 family	0.444924	463	468	Plastid
COG000488	unkn	905079	Guillardia theta CCMP2712	Weakly supported	Weakly supported	long branching donor	0.445019	91.8	88.9	EUKARYOTIC TRANSLATION INITIATION FACTOR	1	273	translation initiation factor activity	0.919643	560	562	Nucleus
COG001308	unkn	905079	Guillardia theta CCMP2712	Weakly supported	Weakly supported	long branching donor	1.45837	80.9	81.3	BETA-1,4-MANNOSYL-GLYCOPROTEIN BETA-1,4-N-ACETYLGLUCOSAMINYL-TRANSFERASE	1	147	Glycosyltransferase family 17	0.814655	232	252	Extracellular
COG006111	unkn	6412	Helobdella robusta	Weakly supported	Weakly supported	long branching recipient	3.57169	83.7	root	ANKYRIN REPEAT-CONTAINING PROTEIN DDB_G0279043	0.5385	13	ankyrin repeat	0.357143	14	14	Unknown
COG001318	unkn	670386	Heterostelium album PN500	455363	unclassified Phycodnaviridae	NA	1.07024	90.1	91.5	RING FINGER DOMAIN-CONTAINING	0.6364	242	ubiquitin-protein transferase activity	0.193416	243	250	Nucleus
COG000134	unkn	5739	Hexamitidae	10239	Viruses	NA	0.346502	81.7	81.3	THYMIDINE KINASE	1	1074	Thymidine kinase	0.408831	1223	1242	Cytoplasm
COG000118	unkn	5739	Hexamitidae	2732007	Nucleocytoviricota	NA	0.379201	99.5	88.6	HEAT SHOCK PROTEIN 90 FAMILY MEMBER	0.9975	1184	Hsp90 protein	0.25405	1358	1376	Cytoplasm
COG000427	unkn	5739	Hexamitidae	Weakly supported	Weakly supported	long branching donor	0.221615	81.7	99.1	LYSYL-TRNA SYNTHETASE	0.993	428	Belongs to the class-II aminoacyl-tRNA synthetase family	0.233831	603	607	Nucleus
COG000007	unkn	9606	Homo sapiens	206037	Human endogenous retroviruses	NA	1.7518e-06	97.6	87.7	ENDOGENOUS RETROVIRUS GROUP K MEMBER POL PROTEIN	0.7503	5615	ribonuclease H activity	0.620133	7987	8051	Nucleus
COG000007	unkn	9606	Homo sapiens	206037	Human endogenous retroviruses	NA	1.7534e-06	80.2	87.7	ENDOGENOUS RETROVIRUS GROUP K MEMBER POL PROTEIN	0.7503	5615	ribonuclease H activity	0.620133	7987	8051	Unknown
COG004840	unkn	2315210	Hondaea fermentalgiana	346673	Coccolithovirus	NA	0.472908	98.3	85.6	DELTA(5) FATTY ACID DESATURASE C-RELATED	1	1	Fatty acid desaturase	0.964286	28	28	Endoplasmic_reticulum
COG003971	unkn	2315210	Hondaea fermentalgiana	455363	unclassified Phycodnaviridae	NA	1.84664	94.6	86.2	ALPHA-1,2-MANNOSYLTRANSFERASE MNN2	1	1	transferase activity, transferring glycosyl groups	0.416667	24	48	Endoplasmic_reticulum
COG005709	unkn	2315210	Hondaea fermentalgiana	455363	unclassified Phycodnaviridae	NA	1.9885	82	89.5	TESTIS-SPECIFIC PROTEIN PBS13 T-COMPLEX 11	1	5	regulation of sperm capacitation	0.75	4	17	Endoplasmic_reticulum
COG001274	unkn	2315210	Hondaea fermentalgiana	2732007	Nucleocytoviricota	NA	1.31845	89.4	94	RIBITOL-5-PHOSPHATE XYLOSYLTRANSFERASE 1	0.8384	99	Haloacid dehalogenase-like hydrolase	0.357143	14	258	Unknown
COG001438	unkn	2315210	Hondaea fermentalgiana	2732007	Nucleocytoviricota	NA	0.514772	86.1	94.4	MANNOSYL PHOSPHORYLINOSITOL CERAMIDE SYNTHASE	1	181	Glycosyltransferase sugar-binding region containing DXD motif	0.502242	223	229	Unknown
COG000098	unkn	31277	Hymenostomatida	10239	Viruses	NA	0.709171	81.9	89.5	DUAL SPECIFICITY PROTEIN PHOSPHATASE	0.3823	1512	Dual specificity phosphatase, catalytic domain	0.230013	1526	1556	Nucleus
COG000334	unkn	42384	Hyphochytrium catenoides	549779	Mimiviridae	NA	0.129221	85.2	82	ALDEHYDE REDUCTASE	0.8688	541	Alcohol dehydrogenase GroES-like domain	0.274929	702	712	Cytoplasm
COG000032	unkn	42384	Hyphochytrium catenoides	2487769	Homavirus sp.	NA	1.17745	82.8	85	THIOREDOXIN	0.4056	1383	Belongs to the thioredoxin family	0.394606	3226	3257	Unknown
COG000314	unkn	42384	Hyphochytrium catenoides	Weakly supported	Weakly supported	long branching donor	0.45589	93.6	81.3	HISTONE H3	0.9324	740	protein heterodimerization activity	0.693767	738	752	Nucleus
COG001655	unkn	42384	Hyphochytrium catenoides	Weakly supported	Weakly supported	long branching donor	0.385917	97.7	92.9	ALKANE 1-MONOOXYGENASE 1	0.9792	48	Fatty acid desaturase	0.641414	198	199	Unknown
COG000342	unkn	1819745	Intoshia linei	10239	Viruses	NA	0.758274	85.7	92.7	DEOXYNUCLEOSIDE TRIPHOSPHATE TRIPHOSPHOHYDROLASE	1	532	dGTPase activity	0.21256	621	698	Cytoplasm
COG000001	unkn	1819745	Intoshia linei	1561226	Testudinid alphaherpesvirus 3	NA	0.830618	96.8	89.8	SERINE/THREONINE-PROTEIN KINASE	0.2995	16718	protein serine/threonine kinase activity	0.191391	17075	17289	Unknown
COG001064	unkn	1819745	Intoshia linei	2732007	Nucleocytoviricota	NA	0.958637	85.8	88.9	THYMIDYLATE KINASE	0.9964	277	Thymidylate kinase	0.366337	303	304	Cytoplasm
COG000378	unkn	1819745	Intoshia linei	Weakly supported	Weakly supported	long branching recipient	0.89235	100	root	NICOTINAMIDE PHOSPHORIBOSYLTRANSFERASE	1	487	nicotinate-nucleotide diphosphorylase (carboxylating) activity	0.483721	645	651	Unknown
COG000516	unkn	431838	Intramacronucleata	10239	Viruses	NA	0.19716	93.6	90	CYTOSINE DEAMINASE FAMILY MEMBER	0.8077	52	Domain of unknown function (DUF1768)	0.526316	532	539	Cytoplasm
COG000204	unkn	6945	Ixodes scapularis	1513461	unclassified Marseilleviridae	NA	0.612554	82	82.6	NUCLEOSIDE DIPHOSPHATE KINASE	0.934	591	Major role in the synthesis of nucleoside triphosphates other than ATP	0.413374	987	987	Cytoplasm
COG003384	unkn	5653	Kinetoplastea	455363	unclassified Phycodnaviridae	NA	0.906833	90.6	root	No annotation	0	0	RNA ligase	0.588235	68	71	Mitochondrion
COG000753	unkn	5653	Kinetoplastea	2732007	Nucleocytoviricota	NA	0.295823	86.5	90.3	ENDOTHELIAL DIFFERENTIATION-RELATED FACTOR 1 MULTIPROTEIN BRIDGING FACTOR 1	1	361	Helix-turn-helix XRE-family like proteins	0.20354	339	401	Nucleus
COG000195	unkn	157538	Leptomonas pyrrhocoris	Weakly supported	Weakly supported	long branching recipient	1.51548	81.5	93.8	URACIL-DNA GLYCOSYLASE	0.9941	847	Excises uracil residues from the DNA which can arise as a result of misincorporation of dUMP residues by DNA polymerase or due to deamination of cytosine	0.505976	1004	1012	Unknown
COG000246	unkn	7574	Lingula anatina	573012	Raphidovirus	NA	1.52871	96.3	84.6	PEPTIDASE S8	0.9414	546	Belongs to the peptidase S8 family	0.335624	873	888	Extracellular
COG000466	unkn	299123	Lonchura striata domestica	Weakly supported	Weakly supported	long branching recipient	0.955366	81.3	94.8	POL PROTEIN	0.7067	491	genomic stop codons	0.435897	546	576	Unknown
COG000466	unkn	9544	Macaca mulatta	11632	Retroviridae	NA	0.248082	91	96.5	POL PROTEIN	0.7067	491	genomic stop codons	0.435897	546	576	Unknown
COG000401	unkn	13792	Mamiellales	455363	unclassified Phycodnaviridae	NA	0.975685	82.9	88	BETA-1,4-GALACTOSYLTRANSFERASE	0.9967	610	N-terminal region of glycosyl transferase group 7	0.248387	620	630	Cytoplasm
COG001577	unkn	13792	Mamiellales	549779	Mimiviridae	NA	0.869777	87.8	93.8	GLUTAMINE AMIDOTRANSFERASE DUG3-RELATED	0.9825	57	Glutamine amidotransferases class-II	0.514423	208	208	Nucleus
COG000038	unkn	1437183	Mesangiospermae	Weakly supported	Weakly supported	long branching recipient	2.49097	90.8	81.4	DNA-DIRECTED RNA POLYMERASE	0.9996	2582	DNA-dependent RNA polymerase catalyzes the transcription of DNA into RNA using the four ribonucleoside triphosphates as substrates	0.704619	2793	2889	Nucleus
COG000134	unkn	2704647	Metakinetoplastina	549779	Mimiviridae	NA	0.260737	83.2	81.9	THYMIDINE KINASE	1	1074	Thymidine kinase	0.408831	1223	1242	Nucleus
COG003772	unkn	2704647	Metakinetoplastina	1513234	Cafeteriavirus	NA	1.01814	90.1	85.2	DNA ANNEALING HELICASE AND ENDONUCLEASE ZRANB3 FAMILY MEMBER	1	1	Poly A polymerase regulatory subunit	0.981481	54	55	Mitochondrion
COG004271	unkn	2704647	Metakinetoplastina	2732523	Megaviricetes	NA	1.0037	87	root	SUPERFAMILY HYDROLASE, PUTATIVE (AFU_ORTHOLOGUE AFUA_1G03035)-RELATED	1	36	Metal dependent phosphohydrolases with conserved 'HD' motif	0.733333	15	40	Cytoplasm
COG003326	unkn	33208	Metazoa	10501	Phycodnaviridae	NA	0.3079	84.9	root	AN1-TYPE ZINC FINGER PROTEIN 4	0.7222	72	ubiquitin	0.411765	68	74	Nucleus
COG006711	unkn	554055	Micractinium conductrix	2732007	Nucleocytoviricota	NA	0.519559	98.7	root	No annotation	0	0	O-methyltransferase activity	1	11	11	Unknown
COG001593	unkn	38832	Micromonas	2732007	Nucleocytoviricota	NA	0.198134	94.3	98.2	UNNAMED PRODUCT	0.8598	107	repeat protein	0.35	160	206	Extracellular
COG001593	unkn	296587	Micromonas commoda	12429	unclassified viruses	NA	0.987331	98.9	root	UNNAMED PRODUCT	0.8598	107	repeat protein	0.35	160	206	Extracellular
COG001593	unkn	296587	Micromonas commoda	181084	Prasinovirus	NA	1.34221	88.1	93.8	UNNAMED PRODUCT	0.8598	107	repeat protein	0.35	160	206	Unknown
COG001497	unkn	296587	Micromonas commoda	2732007	Nucleocytoviricota	NA	0.165711	100	root	ROK (REPRESSOR, ORF, KINASE) FAMILY	0.8806	67	ROK family	0.342466	219	219	Cytoplasm
COG001593	unkn	296587	Micromonas commoda	2732523	Megaviricetes	NA	0.543101	87.6	98.2	UNNAMED PRODUCT	0.8598	107	repeat protein	0.35	160	206	Cell_membrane
COG001593	unkn	564608	Micromonas pusilla CCMP1545	2732007	Nucleocytoviricota	NA	0.199512	91.2	92.6	UNNAMED PRODUCT	0.8598	107	repeat protein	0.35	160	206	Extracellular
COG000897	unkn	564608	Micromonas pusilla CCMP1545	Weakly supported	Weakly supported	long branching recipient	1.83225	90.6	81.1	BETA-1,2-XYLOSYLTRANSFERASE	1	1	Glycosyl transferase, family 2	1	249	357	Unknown
COG000393	unkn	1485682	Mitosporidium daphniae	10239	Viruses	NA	0.844336	89.1	82.9	UDP-GLUCOSE 4-EPIMERASE	0.7828	465	UDP-glucose 4-epimerase	0.169304	632	636	Cytoplasm
COG000204	unkn	1485682	Mitosporidium daphniae	150286	Anguillid herpesvirus 1	NA	0.450766	93.8	82.6	NUCLEOSIDE DIPHOSPHATE KINASE	0.934	591	Major role in the synthesis of nucleoside triphosphates other than ATP	0.413374	987	987	Cytoplasm
COG000110	unkn	1485682	Mitosporidium daphniae	1714377	Bottlenose dolphin adenovirus 1	NA	0.325515	82.5	90.8	DEOXYURIDINE 5'-TRIPHOSPHATE NUCLEOTIDOHYDROLASE	1	940	dUTPase	0.432432	1406	1412	Cytoplasm
COG002508	unkn	145388	Monoraphidium neglectum	Weakly supported	Weakly supported	long branching recipient	1.87847	92.6	96.1	ENDO-BETA-1,6-GALACTANASE	1	51	O-Glycosyl hydrolase family 30	0.694656	131	133	Unknown
COG001389	unkn	81824	Monosiga brevicollis	Weakly supported	Weakly supported	long branching donor	0.555718	98.1	93.6	CALCIUM-ACTIVATED CHLORIDE CHANNEL REGULATOR	0.756	168	Hint-domain	0.560538	223	236	Unknown
COG001555	unkn	81824	Monosiga brevicollis	Weakly supported	Weakly supported	long branching donor	0.922188	99.6	93.4	MANNITOL DEHYDROGENASE DSF1-RELATED	0.9828	58	Mannitol dehydrogenase C-terminal domain	0.228571	210	212	Cytoplasm
COG000019	unkn	5762	Naegleria gruberi	10239	Viruses	NA	0.234369	94.7	90.9	HEAT SHOCK PROTEIN 70KDA	0.8288	3895	Belongs to the heat shock protein 70 family	0.27064	4530	4585	Cytoplasm
COG000617	unkn	5762	Naegleria gruberi	10239	Viruses	NA	1.66008	83.3	88.1	MANNOSYL PHOSPHORYLINOSITOL CERAMIDE SYNTHASE	0.8295	387	Glycosyltransferase sugar-binding region containing DXD motif	0.876126	444	477	Unknown
COG000782	unkn	5762	Naegleria gruberi	10239	Viruses	NA	0.569581	93.8	99.4	OS06G0652100 PROTEIN	1	327	Domain of unknown function (DUF2828)	0.884021	388	393	Cytoplasm
COG000810	unkn	5762	Naegleria gruberi	10239	Viruses	NA	0.636689	86.1	82.6	CAMK FAMILY PROTEIN KINASE	0.5	6	Domain of unknown function (DUF1768)	0.542781	374	381	Cytoplasm
COG001263	unkn	5762	Naegleria gruberi	10239	Viruses	NA	0.319437	99.7	root	No annotation	0	0	RNA ligase	1	258	261	Cytoplasm
COG000021	unkn	5762	Naegleria gruberi	10442	Baculoviridae	NA	0.754283	93.2	82.1	CYSTEINE PROTEASE FAMILY C1-RELATED	0.9951	3849	Belongs to the peptidase C1 family	0.410457	4093	4142	Lysosome/Vacuole
COG000367	unkn	5762	Naegleria gruberi	231992	Feldmannia irregularis virus a	NA	0.322126	88.9	88.8	ALPHA/BETA-HYDROLASES SUPERFAMILY PROTEIN	0.9199	537	Lipase (class 3)	0.37156	654	667	Extracellular
COG000938	unkn	5762	Naegleria gruberi	346673	Coccolithovirus	NA	0.566626	87	86.4	PTHR35596	0.9675	154	Uncharacterized protein conserved in bacteria (DUF2263)	0.957704	331	343	Nucleus
COG000353	unkn	5762	Naegleria gruberi	1513234	Cafeteriavirus	NA	0.723615	90	99.9	OXIDASE/PEROXIDASE	0.9836	610	Animal haem peroxidase	0.452276	681	687	Endoplasmic_reticulum
COG000127	unkn	5762	Naegleria gruberi	1977631	Catovirus CTV1	NA	0.306839	99.8	83.1	2-HYDROXYACID DEHYDROGENASE-RELATED	0.4266	1083	Belongs to the D-isomer specific 2-hydroxyacid dehydrogenase family	0.344958	1319	1324	Cytoplasm
COG001134	unkn	5762	Naegleria gruberi	1977631	Catovirus CTV1	NA	0.433217	93.7	86	SPHINGOSINE KINASE	0.963	27	Diacylglycerol kinase catalytic domain (presumed)	0.238754	289	289	Unknown
COG000189	unkn	5762	Naegleria gruberi	1977639	Klosneuvirus	NA	0.582712	84.6	85.4	GANGLIOSIDE INDUCED DIFFERENTIATION ASSOCIATED PROTEIN 2-RELATED	0.8168	262	Appr-1'-p processing enzyme	0.323558	1023	1029	Unknown
COG005113	unkn	5762	Naegleria gruberi	2023057	Orpheovirus IHUMI-LCC2	NA	1.61948	98.3	root	No annotation	0	0	no annotation	0	0	24	Cytoplasm
COG007370	unkn	5762	Naegleria gruberi	2023203	Pithoviridae	NA	1.14578	84.4	root	No annotation	0	0	no annotation	0	0	9	Unknown
COG005875	unkn	5762	Naegleria gruberi	2042251	Xanthomonas phage XacN1	NA	2.23032	80.4	83.7	No annotation	0	0	nucleotidyltransferase activity	1	13	16	Unknown
COG009592	unkn	5762	Naegleria gruberi	2506595	Pithovirus LCPAC401	NA	1.04916	85	root	RNA POLYMERASE II-ASSOCIATED PROTEIN 3	1	1	negative regulation of ER-associated ubiquitin-dependent protein catabolic process	1	2	4	Cytoplasm
COG000016	unkn	5762	Naegleria gruberi	2732007	Nucleocytoviricota	NA	0.465957	99.6	83.3	AAA-FAMILY ATPASE	0.3075	4859	Belongs to the AAA ATPase family	0.292333	5504	5550	Unknown
COG000113	unkn	5762	Naegleria gruberi	2732007	Nucleocytoviricota	NA	0.743259	89.2	84.3	UBIQUITIN	0.9609	1279	ubiquitin	0.414104	1333	1402	Unknown
COG000113	unkn	5762	Naegleria gruberi	2732007	Nucleocytoviricota	NA	0.056411	89.2	84.3	UBIQUITIN	0.9609	1279	ubiquitin	0.414104	1333	1402	Cytoplasm
COG000429	unkn	5762	Naegleria gruberi	2732007	Nucleocytoviricota	NA	0.537653	100	85.7	NHL REPEAT-CONTAINING PROTEIN 2	0.8098	326	NHL repeat	0.219224	593	606	Cell_membrane
COG000688	unkn	5762	Naegleria gruberi	2732007	Nucleocytoviricota	NA	0.896749	85.2	86.9	SER/THR PROTEIN PHOSPHATASE SUPERFAMILY (AFU_ORTHOLOGUE AFUA_1G14840)	1	272	Calcineurin-like phosphoesterase	0.356643	429	435	Cytoplasm
COG000767	unkn	5762	Naegleria gruberi	2732007	Nucleocytoviricota	NA	0.76126	86	91	COLLAGEN ALPHA	0.3333	3	Phage Tail Collar Domain	0.366667	390	397	Unknown
COG005200	unkn	5762	Naegleria gruberi	2732007	Nucleocytoviricota	NA	2.27166	87.5	root	E3 UBIQUITIN-PROTEIN LIGASE RNF26	0.2	5	E3 ubiquitin-protein ligase LUL4	0.166667	6	22	Cytoplasm
COG005512	unkn	5762	Naegleria gruberi	2732555	Pimascovirales	NA	0.792843	92.8	root	No annotation	0	0	no annotation	0	0	19	Extracellular
COG000001	unkn	5762	Naegleria gruberi	Weakly supported	Weakly supported	long branching donor	0.742762	88.5	85.8	SERINE/THREONINE-PROTEIN KINASE	0.2995	16718	protein serine/threonine kinase activity	0.191391	17075	17289	Cytoplasm
COG000001	unkn	5762	Naegleria gruberi	Weakly supported	Weakly supported	long branching recipient	1.65924	90.9	90.8	SERINE/THREONINE-PROTEIN KINASE	0.2995	16718	protein serine/threonine kinase activity	0.191391	17075	17289	Cytoplasm
COG000017	unkn	5762	Naegleria gruberi	Weakly supported	Weakly supported	long branching recipient	3.19388	93.8	91.6	SNF2/RAD54 HELICASE FAMILY	0.3007	3884	SNF2 family N-terminal domain	0.194991	5031	5096	Nucleus
COG000040	unkn	5762	Naegleria gruberi	Weakly supported	Weakly supported	long branching recipient	5.06016	87.3	80.7	TWO-COMPONENT HISTIDINE KINASE	0.4898	1374	PhoQ Sensor	0.307939	2809	2838	Lysosome/Vacuole
COG000446	unkn	5762	Naegleria gruberi	Weakly supported	Weakly supported	long branching recipient	2.06882	81.9	81.8	SINGLE-STRANDED DNA-BINDING PROTEIN	1	195	Plays an important role in DNA replication, recombination and repair	0.667797	590	592	Mitochondrion
COG000578	unkn	5762	Naegleria gruberi	Weakly supported	Weakly supported	long branching recipient	0.901399	99.7	87	GMP REDUCTASE	1	340	Catalyzes the irreversible NADPH-dependent deamination of GMP to IMP	0.642857	490	496	Unknown
COG002476	unkn	5762	Naegleria gruberi	Weakly supported	Weakly supported	long branching recipient	1.70224	83.3	root	L-FUCOSYLTRANSFERASE	0.5	4	transferase activity, transferring glycosyl groups	0.961832	131	136	Endoplasmic_reticulum
COG002754	unkn	5762	Naegleria gruberi	Weakly supported	Weakly supported	long branching recipient	2.48734	88.4	84.7	6-PHOSPHOGLUCONATE PHOSPHATASE	0.8929	84	pseudouridine 5'-phosphatase activity	0.71	100	110	Cytoplasm
COG000108	unkn	72520	Nannochloropsis gaditana	10239	Viruses	NA	1.38015	89.1	97	DNA POLYMERASE TYPE-X FAMILY MEMBER	0.7341	1245	DNA ligase (NAD+) activity	0.532909	1413	1460	Nucleus
COG000032	unkn	72520	Nannochloropsis gaditana	Weakly supported	Weakly supported	long branching recipient	1.88315	93.1	80.6	THIOREDOXIN	0.4056	1383	Belongs to the thioredoxin family	0.394606	3226	3257	Golgi_apparatus
COG000686	unkn	72520	Nannochloropsis gaditana	Weakly supported	Weakly supported	long branching recipient	4.06343	84	82.8	RAD25/XP-B DNA REPAIR HELICASE	1	269	ERCC3/RAD25/XPB C-terminal helicase	0.213793	435	435	Nucleus
COG000518	unkn	38748	Naviculales	2732523	Megaviricetes	NA	0.043663	100	94.6	PEROXIREDOXIN	0.9917	363	Redoxin	0.332703	529	539	Cytoplasm
COG001458	unkn	45351	Nematostella vectensis	2023203	Pithoviridae	NA	0.909407	84.8	86.1	PHOSPHATIDYLETHANOLAMINE-BINDING PROTEIN	0.9953	213	Phosphatidylethanolamine-binding protein	0.621005	219	225	Unknown
COG000005	unkn	45351	Nematostella vectensis	Weakly supported	Weakly supported	long branching recipient	1.37466	81.1	89.3	DRAB5-RELATED	0.2327	10584	Rab subfamily of small GTPases	0.149102	10798	10903	Unknown
COG000188	unkn	34765	Oikopleura dioica	62099	Anomala cuprea entomopoxvirus	NA	0.724433	95.5	80.3	MATRIX METALLOPROTEINASE	0.9969	983	Belongs to the peptidase M10A family	0.355404	1027	1033	Unknown
COG000203	unkn	34765	Oikopleura dioica	2732007	Nucleocytoviricota	NA	1.01037	87.5	83.2	MICROTUBULE-ASSOCIATED PROTEINS 1A/1B LIGHT CHAIN 3-RELATED	0.999	954	Belongs to the ATG8 family	0.387565	965	987	Cytoplasm
COG000017	unkn	34765	Oikopleura dioica	Weakly supported	Weakly supported	long branching recipient	12.0916	93.8	91.6	SNF2/RAD54 HELICASE FAMILY	0.3007	3884	SNF2 family N-terminal domain	0.194991	5031	5096	Nucleus
COG000118	unkn	34765	Oikopleura dioica	Weakly supported	Weakly supported	long branching recipient	0.997763	86.1	91	HEAT SHOCK PROTEIN 90 FAMILY MEMBER	0.9975	1184	Hsp90 protein	0.25405	1358	1376	Cytoplasm
COG000188	unkn	34765	Oikopleura dioica	Weakly supported	Weakly supported	long branching donor	0.469006	96.4	94.1	MATRIX METALLOPROTEINASE	0.9969	983	Belongs to the peptidase M10A family	0.355404	1027	1033	Extracellular
COG000315	unkn	34765	Oikopleura dioica	Weakly supported	Weakly supported	long branching recipient	1.853	96.6	100	DNA-DIRECTED RNA POLYMERASE, MITOCHONDRIAL	1	682	DNA-directed RNA polymerase activity	0.502008	747	750	Unknown
COG000499	unkn	34765	Oikopleura dioica	Weakly supported	Weakly supported	long branching recipient	1.20158	95.4	88	6-PHOSPHOFRUCTO-2-KINASE/FRUCTOSE-2,6-BISPHOSPHATASE	0.9962	527	6-phosphofructo-2-kinase	0.269928	552	556	Cytoplasm
COG006454	unkn	6020	Oligohymenophorea	10239	Viruses	NA	1.16797	88.6	root	TRANSMEMBRANE PROTEIN-RELATED	1	9	Belongs to the BI1 family	0.5	12	12	Mitochondrion
COG002930	unkn	6020	Oligohymenophorea	455363	unclassified Phycodnaviridae	NA	0.176101	97.3	87.9	NUDIX HYDROLASE 14, CHLOROPLASTIC	1	85	NUDIX domain	0.46875	96	98	Cytoplasm
COG000001	unkn	6020	Oligohymenophorea	2732007	Nucleocytoviricota	NA	0.660441	81.7	85.8	SERINE/THREONINE-PROTEIN KINASE	0.2995	16718	protein serine/threonine kinase activity	0.191391	17075	17289	Cytoplasm
COG000258	unkn	6020	Oligohymenophorea	2732007	Nucleocytoviricota	NA	0.283707	90.5	89.3	C-1-TETRAHYDROFOLATE SYNTHASE, CYTOPLASMIC-RELATED	1	595	Catalyzes the oxidation of 5,10- methylenetetrahydrofolate to 5,10-methenyltetrahydrofolate and then the hydrolysis of 5,10-methenyltetrahydrofolate to 10- formyltetrahydrofolate	0.341094	859	863	Mitochondrion
COG000697	unkn	6020	Oligohymenophorea	2732007	Nucleocytoviricota	NA	0.108827	93.9	89.7	HYPOXANTHINE-GUANINE PHOSPHORIBOSYLTRANSFERASE	1	144	Belongs to the purine pyrimidine phosphoribosyltransferase family	0.74186	430	430	Cytoplasm
COG000743	unkn	6020	Oligohymenophorea	2732007	Nucleocytoviricota	NA	0.255969	91.8	97.5	PHOSPHOSERINE AMINOTRANSFERASE	0.9755	245	Catalyzes the reversible conversion of 3- phosphohydroxypyruvate to phosphoserine and of 3-hydroxy-2-oxo-4- phosphonooxybutanoate to phosphohydroxythreonine	0.441624	394	406	Cytoplasm
COG001431	unkn	6020	Oligohymenophorea	2732523	Megaviricetes	NA	0.158266	83.2	92.3	PUTATIVE PHOSPHOTRANSFERASE	0.9867	225	RNA 2'-phosphotransferase, Tpt1 / KptA family	0.350877	228	230	Cytoplasm
COG002986	unkn	6020	Oligohymenophorea	Weakly supported	Weakly supported	long branching donor	1.20392	89.7	root	MONOOXYGENASE ASQM-RELATED	0.5273	55	FAD binding domain	0.393258	89	94	Mitochondrion
COG000134	unkn	4762	Oomycota	10239	Viruses	NA	0.175739	86.8	85.7	THYMIDINE KINASE	1	1074	Thymidine kinase	0.408831	1223	1242	Cytoplasm
COG000032	unkn	4762	Oomycota	455363	unclassified Phycodnaviridae	NA	0.623359	80.8	80.6	THIOREDOXIN	0.4056	1383	Belongs to the thioredoxin family	0.394606	3226	3257	Cytoplasm
COG000782	unkn	4762	Oomycota	2732007	Nucleocytoviricota	NA	0.209696	87.9	91.5	OS06G0652100 PROTEIN	1	327	Domain of unknown function (DUF2828)	0.884021	388	393	Cytoplasm
COG001289	unkn	8665	Ophiophagus hannah	Weakly supported	Weakly supported	long branching recipient	2.97232	84.1	98	KETIMINE REDUCTASE MU-CRYSTALLIN	0.9806	103	Ornithine cyclodeaminase/mu-crystallin family	0.547244	254	255	Mitochondrion
COG000113	unkn	33154	Opisthokonta	10239	Viruses	NA	0.232424	86.8	87.4	UBIQUITIN	0.9609	1279	ubiquitin	0.414104	1333	1402	Unknown
COG000762	unkn	33154	Opisthokonta	Weakly supported	Weakly supported	long branching donor	0.263612	88.9	root	BIFUNCTIONAL PURINE BIOSYNTHESIS PROTEIN PURH	0.9833	239	Bifunctional purine biosynthesis protein PurH	0.237975	395	397	Cytoplasm
COG000017	unkn	9258	Ornithorhynchus anatinus	Weakly supported	Weakly supported	long branching recipient	4.114	93.8	91.6	SNF2/RAD54 HELICASE FAMILY	0.3007	3884	SNF2 family N-terminal domain	0.194991	5031	5096	Nucleus
COG000032	unkn	39947	Oryza sativa Japonica Group	10239	Viruses	NA	1.20432	87.5	88.1	THIOREDOXIN	0.4056	1383	Belongs to the thioredoxin family	0.394606	3226	3257	Unknown
COG000580	unkn	70448	Ostreococcus tauri	2732523	Megaviricetes	NA	1.12142	81.6	86.2	PROTEIN DISULFIDE-ISOMERASE A6	0.5188	478	Belongs to the protein disulfide isomerase family	0.305955	487	495	Unknown
COG000134	unkn	57506	Oxytrichidae	10239	Viruses	NA	0.862487	86.8	85.7	THYMIDINE KINASE	1	1074	Thymidine kinase	0.408831	1223	1242	Mitochondrion
COG004271	unkn	57506	Oxytrichidae	10239	Viruses	NA	0.601148	94.8	87	SUPERFAMILY HYDROLASE, PUTATIVE (AFU_ORTHOLOGUE AFUA_1G03035)-RELATED	1	36	Metal dependent phosphohydrolases with conserved 'HD' motif	0.733333	15	40	Cytoplasm
COG008890	unkn	57506	Oxytrichidae	10487	Iridovirus	NA	3.50097	86.4	root	RING FINGER AND PROTEASE ASSOCIATED DOMAIN-CONTAINING	0.25	4	Zinc finger, C3HC4 type (RING finger)	0.333333	3	5	Unknown
COG000049	unkn	57506	Oxytrichidae	2732007	Nucleocytoviricota	NA	0.743563	91.2	88.5	CASEIN KINASE-RELATED	0.9962	2357	protein kinase activity	0.174385	2397	2444	Cytoplasm
COG000258	unkn	57506	Oxytrichidae	2732007	Nucleocytoviricota	NA	0.552983	85.1	84.6	C-1-TETRAHYDROFOLATE SYNTHASE, CYTOPLASMIC-RELATED	1	595	Catalyzes the oxidation of 5,10- methylenetetrahydrofolate to 5,10-methenyltetrahydrofolate and then the hydrolysis of 5,10-methenyltetrahydrofolate to 10- formyltetrahydrofolate	0.341094	859	863	Cytoplasm
COG000001	unkn	57506	Oxytrichidae	2732523	Megaviricetes	NA	0.989939	86.1	92.8	SERINE/THREONINE-PROTEIN KINASE	0.2995	16718	protein serine/threonine kinase activity	0.191391	17075	17289	Unknown
COG000005	unkn	57506	Oxytrichidae	Weakly supported	Weakly supported	long branching donor	0.800558	86.9	80.6	DRAB5-RELATED	0.2327	10584	Rab subfamily of small GTPases	0.149102	10798	10903	Unknown
COG001123	unkn	57506	Oxytrichidae	Weakly supported	Weakly supported	long branching recipient	1.71164	83.9	99.8	MALATE SYNTHASE	0.9929	140	Malate synthase	0.431034	290	291	Cytoplasm
COG000005	unkn	5888	Paramecium tetraurelia	1977639	Klosneuvirus	NA	0.855839	93.1	82.4	DRAB5-RELATED	0.2327	10584	Rab subfamily of small GTPases	0.149102	10798	10903	Unknown
COG000030	unkn	5888	Paramecium tetraurelia	2732523	Megaviricetes	NA	0.677659	89.4	81.8	UBIQUITIN-CONJUGATING ENZYME E2	0.9944	3206	protein modification by small protein conjugation	0.406107	3275	3304	Unknown
COG000113	unkn	39717	Paulinella chromatophora	10239	Viruses	NA	0.39828	83.5	83.8	UBIQUITIN	0.9609	1279	ubiquitin	0.414104	1333	1402	Unknown
COG004356	unkn	39717	Paulinella chromatophora	10239	Viruses	NA	1.57197	92.4	85.2	FLAVIN MONOAMINE OXIDASE	0.5455	33	FAD dependent oxidoreductase	0.378378	37	38	Unknown
COG004446	unkn	39717	Paulinella chromatophora	10239	Viruses	NA	0.435779	82.4	87.6	SLR1338 PROTEIN	0.9655	29	von Willebrand factor (vWF) type A domain	0.5	8	36	Extracellular
COG000593	unkn	39717	Paulinella chromatophora	181086	Prymnesiovirus	NA	1.18427	92.8	89.6	WD REPEAT, SAM AND U-BOX DOMAIN-CONTAINING PROTEIN 1	0.7494	451	ubiquitin-protein transferase activity	0.326754	456	489	Cytoplasm
COG001120	unkn	39717	Paulinella chromatophora	455363	unclassified Phycodnaviridae	NA	0.654604	92.5	96.4	PTHR31270	0.9786	140	Glutamine cyclotransferase	0.713793	290	291	Golgi_apparatus
COG004316	unkn	39717	Paulinella chromatophora	1977639	Klosneuvirus	NA	1.24784	100	root	CHITIN SYNTHASE	0.9677	31	chitin synthase activity	1	34	39	Cell_membrane
COG000429	unkn	39717	Paulinella chromatophora	2732007	Nucleocytoviricota	NA	0.29024	99.6	86.1	NHL REPEAT-CONTAINING PROTEIN 2	0.8098	326	NHL repeat	0.219224	593	606	Extracellular
COG000458	unkn	39717	Paulinella chromatophora	2732555	Pimascovirales	NA	0.565416	92.7	84	HIGH MOBILITY GROUP PROTEIN DSP1	0.9269	547	high mobility group	0.407063	538	585	Nucleus
COG002763	unkn	39717	Paulinella chromatophora	2732555	Pimascovirales	NA	1.16204	99.9	92.2	E3 UBIQUITIN-PROTEIN LIGASE TRIM36-RELATED	0.5789	38	Fibronectin type III domain	0.592233	103	109	Cell_membrane
COG000040	unkn	39717	Paulinella chromatophora	Weakly supported	Weakly supported	long branching recipient	3.44596	87.3	80.7	TWO-COMPONENT HISTIDINE KINASE	0.4898	1374	PhoQ Sensor	0.307939	2809	2838	Unknown
COG000762	unkn	39717	Paulinella chromatophora	Weakly supported	Weakly supported	long branching recipient	0.743356	94	91.3	BIFUNCTIONAL PURINE BIOSYNTHESIS PROTEIN PURH	0.9833	239	Bifunctional purine biosynthesis protein PurH	0.237975	395	397	Cytoplasm
COG000658	unkn	1314962	Perkinsela sp. CCAP 1560/4	10501	Phycodnaviridae	NA	1.46965	82.5	90.2	AT29763P-RELATED	0.7828	419	Domain of unknown function (DUF1977)	0.206977	430	450	Endoplasmic_reticulum
COG002659	unkn	4777	Peronosporaceae	2732007	Nucleocytoviricota	NA	0.854566	88.4	root	No annotation	0	0	Phage plasmid primase P4 family	0.410256	117	119	Unknown
COG003892	unkn	556484	Phaeodactylum tricornutum CCAP 1055/1	10501	Phycodnaviridae	NA	1.94192	89	84	No annotation	0	0	no annotation	0	0	50	Endoplasmic_reticulum
COG001593	unkn	556484	Phaeodactylum tricornutum CCAP 1055/1	181084	Prasinovirus	NA	1.92351	88.1	93.8	UNNAMED PRODUCT	0.8598	107	repeat protein	0.35	160	206	Unknown
COG001593	unkn	556484	Phaeodactylum tricornutum CCAP 1055/1	2732007	Nucleocytoviricota	NA	0.808456	93.6	96.2	UNNAMED PRODUCT	0.8598	107	repeat protein	0.35	160	206	Extracellular
COG001691	unkn	3218	Physcomitrium patens	181086	Prymnesiovirus	NA	0.692609	98.6	91.4	PTHR31252	1	119	Domain of unknown function (DUF4419)	0.994652	187	193	Cytoplasm
COG000139	unkn	3218	Physcomitrium patens	455363	unclassified Phycodnaviridae	NA	0.846232	99	87.7	DTDP-D-GLUCOSE 4,6-DEHYDRATASE-RELATED	0.7699	969	dTDP-glucose 4,6-dehydratase activity	0.372171	1193	1220	Mitochondrion
COG001040	unkn	3218	Physcomitrium patens	2732007	Nucleocytoviricota	NA	0.976529	95.8	99.3	REGUCALCIN	0.9808	156	SMP-30/Gluconolaconase/LRE-like region	0.522727	308	311	Cytoplasm
COG003458	unkn	3218	Physcomitrium patens	2732007	Nucleocytoviricota	NA	0.365887	100	100	PTHR31451	1	23	Belongs to the glycosyl hydrolase 5 (cellulase A) family	0.238806	67	68	Extracellular
COG000488	unkn	3218	Physcomitrium patens	Weakly supported	Weakly supported	long branching recipient	4.10845	91.8	88.9	EUKARYOTIC TRANSLATION INITIATION FACTOR	1	273	translation initiation factor activity	0.919643	560	562	Nucleus
COG000580	unkn	134013	Phytomonas sp. isolate Hart1	549779	Mimiviridae	NA	0.819499	97.1	86.2	PROTEIN DISULFIDE-ISOMERASE A6	0.5188	478	Belongs to the protein disulfide isomerase family	0.305955	487	495	Unknown
COG002027	unkn	4783	Phytophthora	2732007	Nucleocytoviricota	NA	1.15053	99.3	85.4	ATP BINDING PROTEIN-RELATED	0.9565	23	D5 N terminal like	1	153	163	Cytoplasm
COG000429	unkn	67593	Phytophthora sojae	2732007	Nucleocytoviricota	NA	0.504852	97.3	85.7	NHL REPEAT-CONTAINING PROTEIN 2	0.8098	326	NHL repeat	0.219224	593	606	Unknown
COG005735	unkn	67593	Phytophthora sojae	2732007	Nucleocytoviricota	NA	0.458529	81.6	root	No annotation	0	0	no annotation	0	0	17	Mitochondrion
COG000007	unkn	67593	Phytophthora sojae	Weakly supported	Weakly supported	long branching recipient	2.91714	89.7	94	ENDOGENOUS RETROVIRUS GROUP K MEMBER POL PROTEIN	0.7503	5615	ribonuclease H activity	0.620133	7987	8051	Unknown
COG001414	unkn	1890364	Planoprotostelium fungivorum	2080449	Acanthamoeba castellanii medusavirus	NA	0.376496	85.2	90	No annotation	0	0	Domain of unknown function (DUF4326)	0.615385	221	233	Nucleus
COG000179	unkn	1890364	Planoprotostelium fungivorum	Weakly supported	Weakly supported	long branching recipient	1.58646	98.3	86.1	5'->3' EXORIBONUCLEASE	1	1016	XRN 5'-3' exonuclease N-terminus	0.779195	1019	1056	Unknown
COG000367	unkn	37360	Plasmodiophora brassicae	455363	unclassified Phycodnaviridae	NA	1.06145	97.3	91.6	ALPHA/BETA-HYDROLASES SUPERFAMILY PROTEIN	0.9199	537	Lipase (class 3)	0.37156	654	667	Unknown
COG000021	unkn	37360	Plasmodiophora brassicae	2732007	Nucleocytoviricota	NA	0.207299	96.9	85.2	CYSTEINE PROTEASE FAMILY C1-RELATED	0.9951	3849	Belongs to the peptidase C1 family	0.410457	4093	4142	Lysosome/Vacuole
COG000272	unkn	37360	Plasmodiophora brassicae	Weakly supported	Weakly supported	long branching recipient	1.35035	88.1	85.3	FLAP ENDONUCLEASE FAMILY MEMBER	0.9927	546	Structure-specific nuclease with 5'-flap endonuclease and 5'-3' exonuclease activities involved in DNA replication and repair	0.751225	816	826	Mitochondrion
COG000518	unkn	5820	Plasmodium	196896	unclassified Myoviridae	NA	0.458921	98.6	94.4	PEROXIREDOXIN	0.9917	363	Redoxin	0.332703	529	539	Endoplasmic_reticulum
COG000003	unkn	5820	Plasmodium	Weakly supported	Weakly supported	long branching recipient	0.588812	86.6	80.4	ATP-DEPENDENT RNA HELICASE	0.4875	2482	RNA-protein covalent cross-linking	0.962677	11387	12749	Cytoplasm
COG001299	unkn	5820	Plasmodium	Weakly supported	Weakly supported	long branching recipient	1.23236	95.5	96.5	CYSTEINE DESULFURASE	0.9703	101	Belongs to the class-V pyridoxal-phosphate-dependent aminotransferase family	0.31746	252	253	Extracellular
COG001368	unkn	5820	Plasmodium	Weakly supported	Weakly supported	long branching donor	0.515868	97.8	84.2	3-OXOACYL-[ACYL-CARRIER-PROTEIN] SYNTHASE	0.8444	90	Catalyzes the condensation reaction of fatty acid synthesis by the addition to an acyl acceptor of two carbons from malonyl-ACP	0.620833	240	240	Extracellular
COG000271	unkn	36329	Plasmodium falciparum 3D7	2732007	Nucleocytoviricota	NA	0.657647	81.4	89.1	CYTOCHROME B5	0.9159	666	heme binding	0.303659	820	830	Nucleus
COG000327	unkn	1137138	Pleurotus ostreatus PC15	10239	Viruses	NA	0.367779	84.6	87.2	METACASPASE-4	0.9935	619	Caspase domain	0.455571	709	725	Cytoplasm
COG003093	unkn	1137138	Pleurotus ostreatus PC15	Weakly supported	Weakly supported	long branching recipient	1.9018	95.9	92.9	No annotation	0	0	RNA ligase	0.647059	85	87	Cytoplasm
COG002978	unkn	133427	Protoceratium reticulatum	10241	Chordopoxvirinae	NA	1.92931	87.1	96.3	BETA-GALACTOSIDE ALPHA-2,6-SIALYLTRANSFERASE	0.9677	93	beta-galactoside alpha-2,6-sialyltransferase activity	0.308511	94	95	Unknown
COG004020	unkn	133427	Protoceratium reticulatum	12429	unclassified viruses	NA	1.6419	93.7	root	GROUNDHOG-RELATED	0.5	2	Poly A polymerase regulatory subunit	1	46	46	Unknown
COG004410	unkn	133427	Protoceratium reticulatum	2732007	Nucleocytoviricota	NA	1.52746	81.9	99	CARBOHYDRATE SULFOTRANSFERASE	1	1	Sulfotransferase family	1	18	37	Unknown
COG001389	unkn	2608131	Prymnesiophyceae	10501	Phycodnaviridae	NA	0.429277	100	93.6	CALCIUM-ACTIVATED CHLORIDE CHANNEL REGULATOR	0.756	168	Hint-domain	0.560538	223	236	Cytoplasm
COG000999	unkn	2608131	Prymnesiophyceae	346673	Coccolithovirus	NA	0.153182	99	91.9	SPHINGOLIPID DELTA 4 DESATURASE/C-4 HYDROXYLASE PROTEIN DES2	1	263	Sphingolipid Delta4-desaturase (DES)	0.253086	324	327	Endoplasmic_reticulum
COG000985	unkn	2608131	Prymnesiophyceae	Weakly supported	Weakly supported	long branching donor	0.74644	84	85.4	PHOSPHO-2-DEHYDRO-3-DEOXYHEPTONATE ALDOLASE DAHP SYNTHETASE	1	177	Stereospecific condensation of phosphoenolpyruvate (PEP) and D-erythrose-4-phosphate (E4P) giving rise to 3-deoxy-D- arabino-heptulosonate-7-phosphate (DAHP)	0.82622	328	330	Unknown
COG000021	unkn	266149	Pseudocohnilembus persalinus	12429	unclassified viruses	NA	0.568992	91.8	86.5	CYSTEINE PROTEASE FAMILY C1-RELATED	0.9951	3849	Belongs to the peptidase C1 family	0.410457	4093	4142	Unknown
COG000005	unkn	266149	Pseudocohnilembus persalinus	2732007	Nucleocytoviricota	NA	0.889409	80.3	89.3	DRAB5-RELATED	0.2327	10584	Rab subfamily of small GTPases	0.149102	10798	10903	Cytoplasm
COG004680	unkn	266149	Pseudocohnilembus persalinus	2732523	Megaviricetes	NA	0.929989	81.1	82.5	GLYCOSYL TRANSFERASE-RELATED	1	30	Polysaccharide deacetylase	0.677419	31	31	Unknown
COG005200	unkn	947166	Ramazzottius varieornatus	549779	Mimiviridae	NA	1.78614	92.9	87.5	E3 UBIQUITIN-PROTEIN LIGASE RNF26	0.2	5	E3 ubiquitin-protein ligase LUL4	0.166667	6	22	Cytoplasm
COG001991	unkn	10116	Rattus norvegicus	10365	Muromegalovirus	NA	2.0567e-06	99.1	86.6	C-TYPE LECTIN DOMAIN-CONTAINING PROTEIN 180	0.8896	163	carbohydrate binding	0.393939	165	166	Cell_membrane
COG003120	unkn	10116	Rattus norvegicus	10365	Muromegalovirus	NA	2.8753e-06	95.2	100	OX-2 MEMBRANE GLYCOPROTEIN	1	85	negative regulation of macrophage activation	0.458824	85	86	Cell_membrane
COG000098	unkn	46433	Reticulomyxa filosa	10239	Viruses	NA	1.82564	93.3	89.5	DUAL SPECIFICITY PROTEIN PHOSPHATASE	0.3823	1512	Dual specificity phosphatase, catalytic domain	0.230013	1526	1556	Unknown
COG001064	unkn	46433	Reticulomyxa filosa	10239	Viruses	NA	0.609757	87.4	94.2	THYMIDYLATE KINASE	0.9964	277	Thymidylate kinase	0.366337	303	304	Unknown
COG009377	unkn	46433	Reticulomyxa filosa	455363	unclassified Phycodnaviridae	NA	1.02874	94.8	root	POPEYE DOMAIN CONTAINING PROTEIN	1	5	Popeye protein conserved region	0.333333	3	5	Endoplasmic_reticulum
COG000014	unkn	46433	Reticulomyxa filosa	573012	Raphidovirus	NA	0.98231	94.8	84.8	DNAJ HOMOLOG SUBFAMILY C MEMBER	0.3541	3253	ATP binding to DnaK triggers the release of the substrate protein, thus completing the reaction cycle	0.315643	5747	5826	Nucleus
COG000394	unkn	46433	Reticulomyxa filosa	1977639	Klosneuvirus	NA	0.47448	94.3	99	UBIQUITIN-ACTIVATING ENZYME E1	0.9983	605	ubiquitin activating enzyme activity	0.296651	627	634	Cytoplasm
COG000098	unkn	46433	Reticulomyxa filosa	2023203	Pithoviridae	NA	1.11064	90.8	91.3	DUAL SPECIFICITY PROTEIN PHOSPHATASE	0.3823	1512	Dual specificity phosphatase, catalytic domain	0.230013	1526	1556	Cytoplasm
COG000005	unkn	46433	Reticulomyxa filosa	Weakly supported	Weakly supported	long branching recipient	1.79617	83.7	89.3	DRAB5-RELATED	0.2327	10584	Rab subfamily of small GTPases	0.149102	10798	10903	Unknown
COG000043	unkn	46433	Reticulomyxa filosa	Weakly supported	Weakly supported	long branching recipient	1.76418	85.7	84.5	THYMIDYLATE SYNTHASE 1	0.701	2381	Thymidylate synthase	0.35328	2607	2647	Mitochondrion
COG000266	unkn	46433	Reticulomyxa filosa	Weakly supported	Weakly supported	long branching recipient	1.48244	81.8	84.3	SERINE PROTEASE FAMILY S1C HTRA-RELATED	0.4932	517	Belongs to the peptidase S1C family	0.232614	834	840	Endoplasmic_reticulum
COG000330	unkn	46433	Reticulomyxa filosa	Weakly supported	Weakly supported	long branching recipient	1.60042	81.7	88	ARSENITE METHYLTRANSFERASE	0.2773	339	Mycolic acid cyclopropane synthetase	0.363636	715	718	Cytoplasm
COG001971	unkn	46433	Reticulomyxa filosa	Weakly supported	Weakly supported	long branching donor	0.182287	82	96.4	TRANSMEMBRANE PROTEIN	1	1	Belongs to the UPF0335 family	0.517857	168	168	Endoplasmic_reticulum
COG000394	unkn	543769	Rhizaria	1977639	Klosneuvirus	NA	1.26554	81.3	99	UBIQUITIN-ACTIVATING ENZYME E1	0.9983	605	ubiquitin activating enzyme activity	0.296651	627	634	Nucleus
COG000036	unkn	588596	Rhizophagus irregularis	455363	unclassified Phycodnaviridae	NA	0.381369	99.1	85.5	PROTEIN PHOSPHATASE 2C	0.6993	2820	protein serine/threonine phosphatase activity	0.215374	2888	2939	Unknown
COG000458	unkn	588596	Rhizophagus irregularis	455363	unclassified Phycodnaviridae	NA	0.606013	94.5	90.7	HIGH MOBILITY GROUP PROTEIN DSP1	0.9269	547	high mobility group	0.407063	538	585	Nucleus
COG000040	unkn	588596	Rhizophagus irregularis	2732007	Nucleocytoviricota	NA	0.409822	88.2	80.7	TWO-COMPONENT HISTIDINE KINASE	0.4898	1374	PhoQ Sensor	0.307939	2809	2838	Unknown
COG002614	unkn	588596	Rhizophagus irregularis	2732007	Nucleocytoviricota	NA	0.174804	84.2	92.5	BLR8090 PROTEIN	0.3333	3	Transcription regulator that activates transcription by stimulating RNA polymerase (RNAP) recycling in case of stress conditions such as supercoiled DNA or high salt concentrations	0.448276	58	123	Nucleus
COG000393	unkn	246409	Rhizopus delemar RA 99-880	2023203	Pithoviridae	NA	0.485988	84.8	87	UDP-GLUCOSE 4-EPIMERASE	0.7828	465	UDP-glucose 4-epimerase	0.169304	632	636	Mitochondrion
[truncated: 4,920 more rows]
